# Supplementary material
Source: publisher figshare collection journal article supplement (https://acs.figshare.com/ndownloader/files/3886534)
Supplement: Supplementary file 1 [file 3886534]

 
data_kbg19
 
_audit_creation_method            SHELXL-2014
_chemical_name_systematic
;
 ?
;
_chemical_name_common             'C70 . 0.68 I2 . 0.32 CS2'
_chemical_melting_point           ?
_chemical_formula_moiety          'C70,  0.68(I2), C0.16 S0.32,  0.32(S),  0.16(C)'
_chemical_formula_sum
 'C70.32 I1.36 S0.64' 
_chemical_formula_weight          1038.06

loop_
 _atom_type_symbol
 _atom_type_description
 _atom_type_scat_dispersion_real
 _atom_type_scat_dispersion_imag
 _atom_type_scat_source
 'C'  'C'   0.0033   0.0016
 'International Tables Vol C Tables 4.2.6.8 and 6.1.1.4'
 'I'  'I'  -0.4742   1.8119
 'International Tables Vol C Tables 4.2.6.8 and 6.1.1.4'
 'S'  'S'   0.1246   0.1234
 'International Tables Vol C Tables 4.2.6.8 and 6.1.1.4'
 
_space_group_crystal_system       orthorhombic
_space_group_IT_number            70
_space_group_name_H-M_alt         'F d d d'
_space_group_name_Hall            '-F 2uv 2vw'
 
_shelx_space_group_comment
;
The symmetry employed for this shelxl refinement is uniquely defined
by the following loop, which should always be used as a source of
symmetry information in preference to the above space-group names.
They are only intended as comments.
;
 
loop_
 _space_group_symop_operation_xyz
 'x, y, z'
 '-x+3/4, -y+3/4, z'
 '-x+3/4, y, -z+3/4'
 'x, -y+3/4, -z+3/4'
 'x, y+1/2, z+1/2'
 '-x+3/4, -y+5/4, z+1/2'
 '-x+3/4, y+1/2, -z+5/4'
 'x, -y+5/4, -z+5/4'
 'x+1/2, y, z+1/2'
 '-x+5/4, -y+3/4, z+1/2'
 '-x+5/4, y, -z+5/4'
 'x+1/2, -y+3/4, -z+5/4'
 'x+1/2, y+1/2, z'
 '-x+5/4, -y+5/4, z'
 '-x+5/4, y+1/2, -z+3/4'
 'x+1/2, -y+5/4, -z+3/4'
 '-x, -y, -z'
 'x-3/4, y-3/4, -z'
 'x-3/4, -y, z-3/4'
 '-x, y-3/4, z-3/4'
 '-x, -y+1/2, -z+1/2'
 'x-3/4, y-1/4, -z+1/2'
 'x-3/4, -y+1/2, z-1/4'
 '-x, y-1/4, z-1/4'
 '-x+1/2, -y, -z+1/2'
 'x-1/4, y-3/4, -z+1/2'
 'x-1/4, -y, z-1/4'
 '-x+1/2, y-3/4, z-1/4'
 '-x+1/2, -y+1/2, -z'
 'x-1/4, y-1/4, -z'
 'x-1/4, -y+1/2, z-3/4'
 '-x+1/2, y-1/4, z-3/4'
 
_cell_length_a                    28.316(5)
_cell_length_b                    28.318(5)
_cell_length_c                    34.196(6)
_cell_angle_alpha                 90
_cell_angle_beta                  90
_cell_angle_gamma                 90
_cell_volume                      27421(8)
_cell_formula_units_Z             32
_cell_measurement_temperature     90(2)
_cell_measurement_reflns_used     9550 
_cell_measurement_theta_min       2.35 
_cell_measurement_theta_max       32.92
 
_exptl_crystal_description        block 
_exptl_crystal_colour             black 
_exptl_crystal_density_meas       ? 
_exptl_crystal_density_method     ?              
_exptl_crystal_density_diffrn     2.012          
_exptl_crystal_F_000              16141
_exptl_transmission_factor_min    ?                                             
_exptl_transmission_factor_max    ?                                             
_exptl_crystal_size_max           0.301
_exptl_crystal_size_mid           0.237
_exptl_crystal_size_min           0.169
_exptl_absorpt_coefficient_mu     1.365
_shelx_estimated_absorpt_T_min    0.684
_shelx_estimated_absorpt_T_max    0.802
_exptl_absorpt_correction_type    multi-scan 
_exptl_absorpt_correction_T_min   0.6185 
_exptl_absorpt_correction_T_max   0.7466 
_exptl_absorpt_process_details    'SADABS (Sheldrick, 2012)'
 
_exptl_special_details
;
 ?
;
 
_diffrn_ambient_temperature       90(2)
_diffrn_radiation_wavelength      0.71073
_diffrn_radiation_type            MoK\a
_diffrn_source                    'fine-focus sealed tube'                       
_diffrn_measurement_device_type   'Bruker Apex II' 
_diffrn_measurement_method        \w 
_diffrn_detector_area_resol_mean  8.3
_diffrn_reflns_number             121736
_diffrn_reflns_av_unetI/netI      0.0171
_diffrn_reflns_av_R_equivalents   0.0328
_diffrn_reflns_limit_h_min        -42
_diffrn_reflns_limit_h_max        42
_diffrn_reflns_limit_k_min        -42
_diffrn_reflns_limit_k_max        42
_diffrn_reflns_limit_l_min        -51
_diffrn_reflns_limit_l_max        51
_diffrn_reflns_theta_min          1.867
_diffrn_reflns_theta_max          32.574
_diffrn_reflns_theta_full         25.242
_diffrn_measured_fraction_theta_max   1.000
_diffrn_measured_fraction_theta_full  1.000
_diffrn_reflns_Laue_measured_fraction_max    1.000
_diffrn_reflns_Laue_measured_fraction_full   1.000
_diffrn_reflns_point_group_measured_fraction_max   1.000
_diffrn_reflns_point_group_measured_fraction_full  1.000
_reflns_number_total              12489
_reflns_number_gt                 11000
_reflns_threshold_expression      'I > 2\s(I)'
_reflns_Friedel_coverage          0.000
_reflns_Friedel_fraction_max      .
_reflns_Friedel_fraction_full     .
 
_reflns_special_details
;
 Reflections were merged by SHELXL according to the crystal
 class for the calculation of statistics and refinement.
 
 _reflns_Friedel_fraction is defined as the number of unique
 Friedel pairs measured divided by the number that would be
 possible theoretically, ignoring centric projections and
 systematic absences.
;
 
_computing_data_collection        'Apex2 (Bruker, 2013)'
_computing_cell_refinement        'SAINT (Bruker, 2013)'
_computing_data_reduction         'SAINT (Bruker, 2013)'
_computing_structure_solution     'XS (Sheldrick, 2008)'
_computing_structure_refinement   'SHELXL-2014 (Sheldrick, 2014)'
_computing_molecular_graphics     ?
_computing_publication_material   'SHELXL-2014 (Sheldrick, 2014)'
 
_refine_special_details
;
 Refined as a 2-component twin.
;
_refine_ls_structure_factor_coef  Fsqd
_refine_ls_matrix_type            full
_refine_ls_weighting_scheme       calc
_refine_ls_weighting_details
'w=1/[\s^2^(Fo^2^)+(0.0223P)^2^+75.7638P] where P=(Fo^2^+2Fc^2^)/3'
_atom_sites_solution_primary      direct
_atom_sites_solution_secondary    difmap
_atom_sites_solution_hydrogens    .
_refine_ls_hydrogen_treatment     undef
_refine_ls_extinction_method      none
_refine_ls_extinction_coef        .
_refine_ls_number_reflns          12489
_refine_ls_number_parameters      682
_refine_ls_number_restraints      0
_refine_ls_R_factor_all           0.0364
_refine_ls_R_factor_gt            0.0288
_refine_ls_wR_factor_ref          0.0685
_refine_ls_wR_factor_gt           0.0630
_refine_ls_goodness_of_fit_ref    1.072
_refine_ls_restrained_S_all       1.072
_refine_ls_shift/su_max           0.001
_refine_ls_shift/su_mean          0.000
 
loop_
 _atom_site_label
 _atom_site_type_symbol
 _atom_site_fract_x
 _atom_site_fract_y
 _atom_site_fract_z
 _atom_site_U_iso_or_equiv
 _atom_site_adp_type
 _atom_site_occupancy
 _atom_site_site_symmetry_order  
 _atom_site_calc_flag
 _atom_site_refinement_flags_posn
 _atom_site_refinement_flags_adp
 _atom_site_refinement_flags_occupancy
 _atom_site_disorder_assembly
 _atom_site_disorder_group
C1 C 0.18814(7) -0.10223(7) -0.03668(6) 0.0265(4) Uani 1 1 d . . . . .
C2 C 0.16971(7) -0.09410(7) 0.00120(6) 0.0257(4) Uani 1 1 d . . . . .
C3 C 0.19767(7) -0.11015(7) 0.03306(6) 0.0255(4) Uani 1 1 d . . . . .
C4 C 0.24575(7) -0.12409(7) 0.02725(7) 0.0244(4) Uani 1 1 d . . . . .
C5 C 0.26724(7) -0.12231(6) -0.01013(6) 0.0250(4) Uani 1 1 d . . . . .
C6 C 0.23647(8) -0.11623(7) -0.04249(6) 0.0270(4) Uani 1 1 d . . . . .
C7 C 0.25261(8) -0.09591(8) -0.07888(7) 0.0307(5) Uani 1 1 d . . . . .
C8 C 0.21370(8) -0.06959(8) -0.09617(6) 0.0326(5) Uani 1 1 d . . . . .
C9 C 0.17404(8) -0.07329(7) -0.06969(7) 0.0314(5) Uani 1 1 d . . . . .
C10 C 0.14451(7) -0.03493(8) -0.06330(7) 0.0305(5) Uani 1 1 d . . . . .
C11 C 0.12779(6) -0.02411(8) -0.02458(7) 0.0282(4) Uani 1 1 d . . . . .
C12 C 0.13857(6) -0.05383(7) 0.00777(7) 0.0261(4) Uani 1 1 d . . . . .
C13 C 0.13767(6) -0.03234(8) 0.04525(7) 0.0273(4) Uani 1 1 d . . . . .
C14 C 0.16436(7) -0.05149(8) 0.07765(6) 0.0279(4) Uani 1 1 d . . . . .
C15 C 0.19375(7) -0.08954(7) 0.07159(6) 0.0271(4) Uani 1 1 d . . . . .
C16 C 0.23998(7) -0.09096(8) 0.09020(6) 0.0272(4) Uani 1 1 d . . . . .
C17 C 0.27189(7) -0.11203(7) 0.06227(6) 0.0251(4) Uani 1 1 d . . . . .
C18 C 0.31790(7) -0.09525(7) 0.05940(6) 0.0247(4) Uani 1 1 d . . . . .
C19 C 0.33899(6) -0.08992(7) 0.02115(6) 0.0238(4) Uani 1 1 d . . . . .
C20 C 0.31552(7) -0.10475(7) -0.01333(6) 0.0254(4) Uani 1 1 d . . . . .
C21 C 0.33005(7) -0.08208(8) -0.04859(6) 0.0276(4) Uani 1 1 d . . . . .
C22 C 0.29850(8) -0.07915(8) -0.08203(6) 0.0317(5) Uani 1 1 d . . . . .
C23 C 0.30788(8) -0.03540(9) -0.10252(6) 0.0343(5) Uani 1 1 d . . . . .
C24 C 0.27065(9) -0.00957(9) -0.11899(6) 0.0353(5) Uani 1 1 d . . . . .
C25 C 0.22246(9) -0.02723(9) -0.11567(6) 0.0355(5) Uani 1 1 d . . . . .
C26 C 0.19127(9) 0.01269(9) -0.10929(6) 0.0340(5) Uani 1 1 d . . . . .
C27 C 0.15336(7) 0.00891(8) -0.08385(7) 0.0312(5) Uani 1 1 d . . . . .
C28 C 0.14266(7) 0.04662(8) -0.05687(7) 0.0286(4) Uani 1 1 d . . . . .
C29 C 0.12672(6) 0.02614(8) -0.02034(7) 0.0266(4) Uani 1 1 d . . . . .
C30 C 0.13615(6) 0.04806(7) 0.01612(7) 0.0267(4) Uani 1 1 d . . . . .
C31 C 0.13663(6) 0.01811(8) 0.04945(7) 0.0271(4) Uani 1 1 d . . . . .
C32 C 0.16271(7) 0.03051(8) 0.08443(6) 0.0291(4) Uani 1 1 d . . . . .
C33 C 0.17969(7) -0.01283(8) 0.10244(6) 0.0284(4) Uani 1 1 d . . . . .
C34 C 0.22423(8) -0.01360(9) 0.12004(6) 0.0307(4) Uani 1 1 d . . . . .
C35 C 0.25466(7) -0.05375(9) 0.11360(6) 0.0276(4) Uani 1 1 d . . . . .
C36 C 0.30296(7) -0.03664(8) 0.11040(5) 0.0274(4) Uani 1 1 d . . . . .
C37 C 0.33380(7) -0.05715(8) 0.08367(6) 0.0255(4) Uani 1 1 d . . . . .
C38 C 0.36442(6) -0.02760(7) 0.06037(6) 0.0232(4) Uani 1 1 d . . . . .
C39 C 0.36793(6) -0.04846(7) 0.02161(6) 0.0234(4) Uani 1 1 d . . . . .
C40 C 0.37390(6) -0.02039(7) -0.01208(6) 0.0228(4) Uani 1 1 d . . . . .
C41 C 0.35858(7) -0.04068(8) -0.04797(6) 0.0268(4) Uani 1 1 d . . . . .
C42 C 0.34504(7) -0.01127(8) -0.08105(6) 0.0299(5) Uani 1 1 d . . . . .
C43 C 0.34375(7) 0.03699(8) -0.07711(6) 0.0283(4) Uani 1 1 d . . . . .
C44 C 0.30562(8) 0.06415(8) -0.09436(6) 0.0293(4) Uani 1 1 d . . . . .
C45 C 0.26934(9) 0.04152(9) -0.11475(6) 0.0336(5) Uani 1 1 d . . . . .
C46 C 0.22061(8) 0.05532(9) -0.10884(6) 0.0328(5) Uani 1 1 d . . . . .
C47 C 0.20977(8) 0.09129(8) -0.08283(6) 0.0291(4) Uani 1 1 d . . . . .
C48 C 0.17040(7) 0.08679(7) -0.05646(6) 0.0288(4) Uani 1 1 d . . . . .
C49 C 0.18337(7) 0.10791(7) -0.01945(6) 0.0259(4) Uani 1 1 d . . . . .
C50 C 0.16575(6) 0.09046(7) 0.01662(6) 0.0257(4) Uani 1 1 d . . . . .
C51 C 0.19291(7) 0.10019(7) 0.05032(6) 0.0253(4) Uani 1 1 d . . . . .
C52 C 0.19031(7) 0.07065(7) 0.08491(6) 0.0279(4) Uani 1 1 d . . . . .
C53 C 0.23609(8) 0.06963(8) 0.10336(6) 0.0280(4) Uani 1 1 d . . . . .
C54 C 0.25302(7) 0.02829(9) 0.12029(6) 0.0295(5) Uani 1 1 d . . . . .
C55 C 0.30180(8) 0.01434(8) 0.11445(5) 0.0274(4) Uani 1 1 d . . . . .
C56 C 0.33143(7) 0.04227(7) 0.09205(6) 0.0251(4) Uani 1 1 d . . . . .
C57 C 0.36326(6) 0.02066(7) 0.06424(6) 0.0229(4) Uani 1 1 d . . . . .
C58 C 0.36571(6) 0.05033(7) 0.02999(6) 0.0210(3) Uani 1 1 d . . . . .
C59 C 0.37287(6) 0.03095(7) -0.00793(6) 0.0216(4) Uani 1 1 d . . . . .
C60 C 0.35634(6) 0.05850(7) -0.03973(6) 0.0224(4) Uani 1 1 d . . . . .
C61 C 0.32568(6) 0.09803(7) -0.03392(6) 0.0217(4) Uani 1 1 d . . . . .
C62 C 0.29414(7) 0.10139(7) -0.06737(6) 0.0254(4) Uani 1 1 d . . . . .
C63 C 0.24749(7) 0.11483(7) -0.06152(6) 0.0257(4) Uani 1 1 d . . . . .
C64 C 0.23083(7) 0.12513(6) -0.02268(6) 0.0233(4) Uani 1 1 d . . . . .
C65 C 0.26159(7) 0.12543(6) 0.00994(6) 0.0211(3) Uani 1 1 d . . . . .
C66 C 0.24054(7) 0.11737(7) 0.04694(6) 0.0234(4) Uani 1 1 d . . . . .
C67 C 0.26713(7) 0.09869(7) 0.07942(6) 0.0250(4) Uani 1 1 d . . . . .
C68 C 0.31357(7) 0.08519(7) 0.07416(5) 0.0236(4) Uani 1 1 d . . . . .
C69 C 0.33518(6) 0.09012(6) 0.03581(5) 0.0200(3) Uani 1 1 d . . . . .
C70 C 0.31071(6) 0.11113(6) 0.00419(5) 0.0197(3) Uani 1 1 d . . . . .
I1 I 0.00576(2) 0.00014(3) 0.03878(2) 0.01260(8) Uani 0.6831(14) 1 d . . P A 1
S1 S 0.0122(2) -0.0037(3) 0.04381(18) 0.0293(16) Uani 0.3169(14) 1 d . . P A 2
C71 C 0.0000 0.0000 0.0000 0.0198(15) Uani 0.3169(14) 2 d S . P A 2
I2 I 0.50075(2) 0.00194(2) 0.03923(2) 0.01334(7) Uani 0.6814(14) 1 d . . P B 3
S2 S 0.49130(18) 0.0012(3) 0.04368(18) 0.0261(11) Uani 0.3186(14) 1 d . . P B 4
C72 C 0.5000 0.0000 0.0000 0.0227(16) Uani 0.3186(14) 2 d S . P B 4
 
loop_
 _atom_site_aniso_label
 _atom_site_aniso_U_11
 _atom_site_aniso_U_22
 _atom_site_aniso_U_33
 _atom_site_aniso_U_23
 _atom_site_aniso_U_13
 _atom_site_aniso_U_12
C1 0.0258(9) 0.0160(9) 0.0376(11) -0.0040(8) -0.0118(8) -0.0085(7)
C2 0.0180(8) 0.0161(8) 0.0430(11) 0.0040(8) -0.0050(7) -0.0091(6)
C3 0.0227(9) 0.0122(8) 0.0415(11) 0.0073(7) -0.0007(8) -0.0071(6)
C4 0.0261(9) 0.0095(7) 0.0375(11) 0.0040(7) -0.0037(7) -0.0023(6)
C5 0.0264(9) 0.0087(7) 0.0400(11) -0.0046(7) -0.0033(8) 0.0036(6)
C6 0.0329(10) 0.0123(8) 0.0358(11) -0.0097(7) -0.0067(8) -0.0027(7)
C7 0.0424(12) 0.0235(10) 0.0263(10) -0.0167(8) -0.0027(8) -0.0021(8)
C8 0.0426(12) 0.0322(11) 0.0228(10) -0.0137(8) -0.0115(8) -0.0056(9)
C9 0.0330(11) 0.0257(10) 0.0355(11) -0.0056(8) -0.0196(8) -0.0097(8)
C10 0.0227(9) 0.0293(11) 0.0394(12) 0.0000(9) -0.0196(8) -0.0075(8)
C11 0.0114(7) 0.0282(10) 0.0449(12) 0.0028(9) -0.0110(7) -0.0048(7)
C12 0.0099(7) 0.0215(9) 0.0469(12) 0.0059(8) -0.0033(7) -0.0078(6)
C13 0.0115(7) 0.0284(10) 0.0420(12) 0.0072(9) 0.0071(7) -0.0033(7)
C14 0.0188(8) 0.0332(11) 0.0317(10) 0.0121(9) 0.0107(7) -0.0056(7)
C15 0.0263(9) 0.0228(10) 0.0323(10) 0.0120(8) 0.0064(8) -0.0076(7)
C16 0.0286(9) 0.0256(10) 0.0276(10) 0.0166(8) 0.0009(8) -0.0042(8)
C17 0.0284(9) 0.0150(8) 0.0320(10) 0.0119(7) -0.0055(8) 0.0011(7)
C18 0.0228(8) 0.0187(9) 0.0326(10) 0.0081(7) -0.0074(7) 0.0060(7)
C19 0.0161(7) 0.0170(8) 0.0383(10) 0.0013(7) -0.0042(7) 0.0082(6)
C20 0.0212(8) 0.0150(8) 0.0401(11) -0.0065(8) 0.0009(8) 0.0085(6)
C21 0.0248(9) 0.0251(10) 0.0328(10) -0.0125(8) 0.0060(8) 0.0075(7)
C22 0.0374(11) 0.0318(11) 0.0258(10) -0.0183(9) 0.0060(8) 0.0025(9)
C23 0.0402(12) 0.0424(13) 0.0203(9) -0.0137(9) 0.0117(8) -0.0020(9)
C24 0.0454(13) 0.0482(15) 0.0124(8) -0.0079(8) 0.0017(8) -0.0052(10)
C25 0.0478(13) 0.0448(14) 0.0139(9) -0.0086(8) -0.0108(8) -0.0076(11)
C26 0.0418(12) 0.0406(13) 0.0195(9) 0.0021(8) -0.0196(8) -0.0030(10)
C27 0.0277(10) 0.0354(12) 0.0304(11) 0.0041(9) -0.0207(8) -0.0039(8)
C28 0.0180(8) 0.0299(10) 0.0379(11) 0.0077(9) -0.0157(8) 0.0031(7)
C29 0.0091(7) 0.0266(10) 0.0441(12) 0.0084(9) -0.0066(7) 0.0017(6)
C30 0.0107(7) 0.0256(10) 0.0439(12) 0.0012(9) 0.0025(7) 0.0071(6)
C31 0.0117(7) 0.0294(10) 0.0401(11) 0.0033(9) 0.0108(7) 0.0037(7)
C32 0.0230(9) 0.0345(11) 0.0297(10) -0.0043(9) 0.0150(7) 0.0035(8)
C33 0.0275(9) 0.0349(11) 0.0227(9) 0.0042(8) 0.0158(7) -0.0007(8)
C34 0.0347(11) 0.0418(12) 0.0156(9) 0.0069(8) 0.0109(7) -0.0023(9)
C35 0.0371(11) 0.0331(11) 0.0125(8) 0.0105(8) 0.0009(7) -0.0046(8)
C36 0.0329(10) 0.0342(11) 0.0151(8) 0.0104(7) -0.0091(7) -0.0034(8)
C37 0.0220(8) 0.0295(10) 0.0251(9) 0.0109(8) -0.0114(7) 0.0014(7)
C38 0.0137(7) 0.0266(9) 0.0293(9) 0.0063(7) -0.0113(6) 0.0008(6)
C39 0.0105(7) 0.0238(9) 0.0359(10) 0.0009(8) -0.0032(6) 0.0074(6)
C40 0.0081(7) 0.0261(10) 0.0341(10) -0.0013(8) 0.0046(6) 0.0031(6)
C41 0.0176(8) 0.0330(11) 0.0297(10) -0.0081(8) 0.0096(7) 0.0073(7)
C42 0.0279(10) 0.0405(12) 0.0214(9) -0.0044(8) 0.0147(7) -0.0003(8)
C43 0.0267(9) 0.0380(12) 0.0202(9) 0.0035(8) 0.0122(7) -0.0065(8)
C44 0.0359(11) 0.0374(12) 0.0146(8) 0.0099(8) 0.0063(7) -0.0086(8)
C45 0.0467(13) 0.0435(13) 0.0106(8) 0.0065(8) 0.0002(8) -0.0070(10)
C46 0.0400(12) 0.0407(13) 0.0179(9) 0.0120(9) -0.0112(8) -0.0033(9)
C47 0.0339(10) 0.0281(10) 0.0254(10) 0.0149(8) -0.0116(8) -0.0017(8)
C48 0.0230(9) 0.0246(10) 0.0388(11) 0.0128(8) -0.0124(8) 0.0044(7)
C49 0.0217(9) 0.0151(8) 0.0410(11) 0.0065(8) -0.0055(8) 0.0072(6)
C50 0.0171(8) 0.0182(9) 0.0417(11) 0.0001(8) 0.0027(7) 0.0098(6)
C51 0.0228(9) 0.0170(9) 0.0361(11) -0.0050(7) 0.0079(7) 0.0065(7)
C52 0.0297(10) 0.0271(10) 0.0268(9) -0.0070(8) 0.0147(7) 0.0058(8)
C53 0.0372(11) 0.0293(10) 0.0175(9) -0.0098(8) 0.0092(8) 0.0011(8)
C54 0.0400(12) 0.0380(12) 0.0107(8) -0.0041(8) 0.0045(7) -0.0007(9)
C55 0.0352(11) 0.0349(11) 0.0119(8) 0.0005(7) -0.0066(7) -0.0040(8)
C56 0.0286(9) 0.0291(10) 0.0176(8) -0.0029(7) -0.0103(7) -0.0055(8)
C57 0.0159(8) 0.0283(10) 0.0244(9) 0.0010(7) -0.0108(6) -0.0023(7)
C58 0.0121(7) 0.0226(9) 0.0283(9) 0.0005(7) -0.0053(6) -0.0066(6)
C59 0.0084(7) 0.0262(9) 0.0300(9) 0.0005(8) 0.0030(6) -0.0042(6)
C60 0.0157(7) 0.0264(10) 0.0253(9) 0.0024(7) 0.0068(6) -0.0084(7)
C61 0.0215(8) 0.0194(9) 0.0243(9) 0.0064(7) 0.0016(6) -0.0099(7)
C62 0.0309(10) 0.0230(9) 0.0222(9) 0.0114(7) 0.0009(7) -0.0083(7)
C63 0.0329(10) 0.0179(9) 0.0263(10) 0.0111(8) -0.0052(7) -0.0029(7)
C64 0.0253(9) 0.0109(7) 0.0339(10) 0.0077(7) -0.0046(7) 0.0017(6)
C65 0.0238(8) 0.0088(7) 0.0306(9) -0.0003(7) -0.0014(7) -0.0030(6)
C66 0.0284(9) 0.0126(8) 0.0291(10) -0.0057(7) 0.0024(7) 0.0034(7)
C67 0.0323(10) 0.0200(9) 0.0228(9) -0.0122(7) 0.0005(7) -0.0007(7)
C68 0.0290(9) 0.0222(9) 0.0195(8) -0.0072(7) -0.0055(7) -0.0083(7)
C69 0.0189(8) 0.0175(8) 0.0236(9) -0.0018(6) -0.0038(6) -0.0085(6)
C70 0.0205(8) 0.0120(7) 0.0265(9) 0.0012(6) -0.0010(6) -0.0072(6)
I1 0.01564(12) 0.01341(12) 0.0087(2) 0.00078(13) -0.00161(13) -0.00187(9)
S1 0.050(3) 0.033(2) 0.0054(12) 0.0031(10) -0.0077(12) -0.0049(18)
C71 0.017(4) 0.017(4) 0.026(4) 0.000(3) -0.003(2) 0.003(3)
I2 0.01577(17) 0.01337(10) 0.01089(16) 0.00035(10) 0.00286(10) -0.00104(10)
S2 0.034(3) 0.0343(13) 0.0097(13) -0.0015(10) -0.0010(14) -0.0002(17)
C72 0.022(4) 0.026(5) 0.020(4) 0.003(3) 0.000(3) -0.002(3)
 
_geom_special_details
;
 All esds (except the esd in the dihedral angle between two l.s. planes)
 are estimated using the full covariance matrix.  The cell esds are taken
 into account individually in the estimation of esds in distances, angles
 and torsion angles; correlations between esds in cell parameters are only
 used when they are defined by crystal symmetry.  An approximate (isotropic)
 treatment of cell esds is used for estimating esds involving l.s. planes.
;
 
loop_
 _geom_bond_atom_site_label_1
 _geom_bond_atom_site_label_2
 _geom_bond_distance
 _geom_bond_site_symmetry_2
 _geom_bond_publ_flag
C1 C2 1.415(3) . ?
C1 C6 1.439(3) . ?
C1 C9 1.451(3) . ?
C2 C3 1.422(3) . ?
C2 C12 1.459(3) . ?
C3 C4 1.431(3) . ?
C3 C15 1.445(3) . ?
C4 C5 1.416(3) . ?
C4 C17 1.449(3) . ?
C5 C6 1.419(3) . ?
C5 C20 1.459(3) . ?
C6 C7 1.445(3) . ?
C7 C22 1.388(3) . ?
C7 C8 1.456(3) . ?
C8 C25 1.395(3) . ?
C8 C9 1.446(3) . ?
C9 C10 1.388(3) . ?
C10 C11 1.439(3) . ?
C10 C27 1.448(3) . ?
C11 C12 1.423(3) . ?
C11 C29 1.431(3) . ?
C12 C13 1.419(3) . ?
C13 C31 1.436(3) . ?
C13 C14 1.447(3) . ?
C14 C15 1.377(3) . ?
C14 C33 1.451(3) . ?
C15 C16 1.456(3) . ?
C16 C35 1.387(3) . ?
C16 C17 1.444(3) . ?
C17 C18 1.390(3) . ?
C18 C37 1.434(3) . ?
C18 C19 1.446(3) . ?
C19 C20 1.417(3) . ?
C19 C39 1.432(3) . ?
C20 C21 1.426(3) . ?
C21 C41 1.424(3) . ?
C21 C22 1.453(3) . ?
C22 C23 1.448(3) . ?
C23 C24 1.401(3) . ?
C23 C42 1.454(3) . ?
C24 C45 1.455(4) . ?
C24 C25 1.458(3) . ?
C25 C26 1.451(4) . ?
C26 C27 1.386(3) . ?
C26 C46 1.465(3) . ?
C27 C28 1.443(3) . ?
C28 C48 1.382(3) . ?
C28 C29 1.450(3) . ?
C29 C30 1.418(3) . ?
C30 C31 1.421(3) . ?
C30 C50 1.465(3) . ?
C31 C32 1.449(3) . ?
C32 C52 1.380(3) . ?
C32 C33 1.455(3) . ?
C33 C34 1.398(3) . ?
C34 C54 1.439(3) . ?
C34 C35 1.444(3) . ?
C35 C36 1.455(3) . ?
C36 C37 1.391(3) . ?
C36 C55 1.451(3) . ?
C37 C38 1.445(3) . ?
C38 C57 1.373(3) . ?
C38 C39 1.455(3) . ?
C39 C40 1.410(3) . ?
C40 C41 1.423(3) . ?
C40 C59 1.461(3) . ?
C41 C42 1.456(3) . ?
C42 C43 1.374(3) . ?
C43 C44 1.451(3) . ?
C43 C60 1.460(3) . ?
C44 C45 1.397(3) . ?
C44 C62 1.439(3) . ?
C45 C46 1.448(3) . ?
C46 C47 1.387(3) . ?
C47 C48 1.439(3) . ?
C47 C63 1.455(3) . ?
C48 C49 1.447(3) . ?
C49 C50 1.419(3) . ?
C49 C64 1.434(3) . ?
C50 C51 1.412(3) . ?
C51 C66 1.438(3) . ?
C51 C52 1.451(3) . ?
C52 C53 1.442(3) . ?
C53 C54 1.391(3) . ?
C53 C67 1.456(3) . ?
C54 C55 1.451(3) . ?
C55 C56 1.384(3) . ?
C56 C57 1.446(3) . ?
C56 C68 1.452(3) . ?
C57 C58 1.443(3) . ?
C58 C59 1.423(3) . ?
C58 C69 1.434(3) . ?
C59 C60 1.418(3) . ?
C60 C61 1.431(3) . ?
C61 C70 1.420(3) . ?
C61 C62 1.454(3) . ?
C62 C63 1.389(3) . ?
C63 C64 1.439(3) . ?
C64 C65 1.415(3) . ?
C65 C66 1.417(3) . ?
C65 C70 1.462(3) . ?
C66 C67 1.442(3) . ?
C67 C68 1.381(3) . ?
C68 C69 1.454(3) . ?
C69 C70 1.415(3) . ?
I1 I1 2.6724(14) 17 ?
S1 C71 1.541(6) . ?
C71 S1 1.541(6) 17 ?
I2 I2 2.6856(15) 17_655 ?
S2 C72 1.514(6) . ?
C72 S2 1.514(6) 17_655 ?
 
loop_
 _geom_angle_atom_site_label_1
 _geom_angle_atom_site_label_2
 _geom_angle_atom_site_label_3
 _geom_angle
 _geom_angle_site_symmetry_1
 _geom_angle_site_symmetry_3
 _geom_angle_publ_flag
C2 C1 C6 121.47(18) . . ?
C2 C1 C9 121.2(2) . . ?
C6 C1 C9 108.04(19) . . ?
C1 C2 C3 116.37(19) . . ?
C1 C2 C12 119.42(19) . . ?
C3 C2 C12 117.9(2) . . ?
C2 C3 C4 120.8(2) . . ?
C2 C3 C15 121.79(19) . . ?
C4 C3 C15 108.11(18) . . ?
C5 C4 C3 121.60(19) . . ?
C5 C4 C17 121.21(18) . . ?
C3 C4 C17 107.83(19) . . ?
C4 C5 C6 116.39(19) . . ?
C4 C5 C20 118.84(19) . . ?
C6 C5 C20 118.4(2) . . ?
C5 C6 C1 120.64(19) . . ?
C5 C6 C7 121.7(2) . . ?
C1 C6 C7 108.06(19) . . ?
C22 C7 C6 119.9(2) . . ?
C22 C7 C8 120.1(2) . . ?
C6 C7 C8 108.31(19) . . ?
C25 C8 C9 120.0(2) . . ?
C25 C8 C7 120.0(2) . . ?
C9 C8 C7 107.2(2) . . ?
C10 C9 C8 120.6(2) . . ?
C10 C9 C1 119.0(2) . . ?
C8 C9 C1 108.33(19) . . ?
C9 C10 C11 120.6(2) . . ?
C9 C10 C27 119.4(2) . . ?
C11 C10 C27 108.7(2) . . ?
C12 C11 C29 120.9(2) . . ?
C12 C11 C10 121.3(2) . . ?
C29 C11 C10 108.19(19) . . ?
C13 C12 C11 116.40(19) . . ?
C13 C12 C2 119.03(19) . . ?
C11 C12 C2 118.2(2) . . ?
C12 C13 C31 121.16(19) . . ?
C12 C13 C14 121.43(19) . . ?
C31 C13 C14 107.89(19) . . ?
C15 C14 C13 119.6(2) . . ?
C15 C14 C33 119.83(19) . . ?
C13 C14 C33 108.71(19) . . ?
C14 C15 C3 119.97(19) . . ?
C14 C15 C16 119.9(2) . . ?
C3 C15 C16 108.56(18) . . ?
C35 C16 C17 120.52(19) . . ?
C35 C16 C15 120.0(2) . . ?
C17 C16 C15 106.56(19) . . ?
C18 C17 C16 119.48(19) . . ?
C18 C17 C4 120.05(19) . . ?
C16 C17 C4 108.93(17) . . ?
C17 C18 C37 120.69(19) . . ?
C17 C18 C19 119.14(18) . . ?
C37 C18 C19 108.39(18) . . ?
C20 C19 C39 121.36(19) . . ?
C20 C19 C18 121.87(18) . . ?
C39 C19 C18 108.19(18) . . ?
C19 C20 C21 115.77(19) . . ?
C19 C20 C5 118.54(19) . . ?
C21 C20 C5 119.14(19) . . ?
C41 C21 C20 121.42(19) . . ?
C41 C21 C22 108.3(2) . . ?
C20 C21 C22 120.9(2) . . ?
C7 C22 C23 120.1(2) . . ?
C7 C22 C21 119.7(2) . . ?
C23 C22 C21 108.5(2) . . ?
C24 C23 C22 120.2(2) . . ?
C24 C23 C42 120.1(2) . . ?
C22 C23 C42 106.9(2) . . ?
C23 C24 C45 119.9(2) . . ?
C23 C24 C25 119.6(2) . . ?
C45 C24 C25 108.0(2) . . ?
C8 C25 C26 119.3(2) . . ?
C8 C25 C24 119.9(2) . . ?
C26 C25 C24 108.3(2) . . ?
C27 C26 C25 120.4(2) . . ?
C27 C26 C46 119.7(2) . . ?
C25 C26 C46 107.3(2) . . ?
C26 C27 C28 120.4(2) . . ?
C26 C27 C10 120.3(2) . . ?
C28 C27 C10 106.7(2) . . ?
C48 C28 C27 119.7(2) . . ?
C48 C28 C29 119.8(2) . . ?
C27 C28 C29 108.67(19) . . ?
C30 C29 C11 121.38(19) . . ?
C30 C29 C28 121.60(19) . . ?
C11 C29 C28 107.7(2) . . ?
C29 C30 C31 116.5(2) . . ?
C29 C30 C50 118.5(2) . . ?
C31 C30 C50 118.3(2) . . ?
C30 C31 C13 120.9(2) . . ?
C30 C31 C32 121.51(19) . . ?
C13 C31 C32 108.25(19) . . ?
C52 C32 C31 119.9(2) . . ?
C52 C32 C33 120.2(2) . . ?
C31 C32 C33 108.28(19) . . ?
C34 C33 C14 120.7(2) . . ?
C34 C33 C32 119.6(2) . . ?
C14 C33 C32 106.87(19) . . ?
C33 C34 C54 120.1(2) . . ?
C33 C34 C35 119.0(2) . . ?
C54 C34 C35 108.17(19) . . ?
C16 C35 C34 120.5(2) . . ?
C16 C35 C36 119.4(2) . . ?
C34 C35 C36 108.1(2) . . ?
C37 C36 C55 119.48(19) . . ?
C37 C36 C35 120.0(2) . . ?
C55 C36 C35 107.64(19) . . ?
C36 C37 C18 119.82(18) . . ?
C36 C37 C38 119.83(19) . . ?
C18 C37 C38 107.76(18) . . ?
C57 C38 C37 120.59(19) . . ?
C57 C38 C39 119.57(18) . . ?
C37 C38 C39 107.96(18) . . ?
C40 C39 C19 121.47(18) . . ?
C40 C39 C38 121.59(18) . . ?
C19 C39 C38 107.70(18) . . ?
C39 C40 C41 116.14(19) . . ?
C39 C40 C59 118.64(18) . . ?
C41 C40 C59 118.66(18) . . ?
C40 C41 C21 121.2(2) . . ?
C40 C41 C42 121.3(2) . . ?
C21 C41 C42 108.05(19) . . ?
C43 C42 C23 119.9(2) . . ?
C43 C42 C41 120.0(2) . . ?
C23 C42 C41 108.3(2) . . ?
C42 C43 C44 120.5(2) . . ?
C42 C43 C60 119.6(2) . . ?
C44 C43 C60 108.45(19) . . ?
C45 C44 C62 119.4(2) . . ?
C45 C44 C43 120.5(2) . . ?
C62 C44 C43 107.21(18) . . ?
C44 C45 C46 120.5(2) . . ?
C44 C45 C24 119.1(2) . . ?
C46 C45 C24 107.9(2) . . ?
C47 C46 C45 119.9(2) . . ?
C47 C46 C26 119.1(2) . . ?
C45 C46 C26 108.4(2) . . ?
C46 C47 C48 120.5(2) . . ?
C46 C47 C63 119.7(2) . . ?
C48 C47 C63 107.17(19) . . ?
C28 C48 C47 120.4(2) . . ?
C28 C48 C49 119.5(2) . . ?
C47 C48 C49 108.35(18) . . ?
C50 C49 C64 120.97(18) . . ?
C50 C49 C48 121.81(19) . . ?
C64 C49 C48 108.12(19) . . ?
C51 C50 C49 116.73(18) . . ?
C51 C50 C30 118.76(19) . . ?
C49 C50 C30 118.4(2) . . ?
C50 C51 C66 120.74(19) . . ?
C50 C51 C52 121.68(19) . . ?
C66 C51 C52 107.94(18) . . ?
C32 C52 C53 119.9(2) . . ?
C32 C52 C51 119.6(2) . . ?
C53 C52 C51 108.84(18) . . ?
C54 C53 C52 120.6(2) . . ?
C54 C53 C67 120.12(19) . . ?
C52 C53 C67 106.57(18) . . ?
C53 C54 C34 119.7(2) . . ?
C53 C54 C55 120.0(2) . . ?
C34 C54 C55 108.3(2) . . ?
C56 C55 C54 119.9(2) . . ?
C56 C55 C36 120.2(2) . . ?
C54 C55 C36 107.79(19) . . ?
C55 C56 C57 120.0(2) . . ?
C55 C56 C68 120.03(19) . . ?
C57 C56 C68 107.13(17) . . ?
C38 C57 C58 120.01(18) . . ?
C38 C57 C56 119.96(19) . . ?
C58 C57 C56 108.49(17) . . ?
C59 C58 C69 121.03(17) . . ?
C59 C58 C57 121.46(18) . . ?
C69 C58 C57 108.42(17) . . ?
C60 C59 C58 116.09(18) . . ?
C60 C59 C40 118.67(18) . . ?
C58 C59 C40 118.37(17) . . ?
C59 C60 C61 121.62(17) . . ?
C59 C60 C43 121.50(19) . . ?
C61 C60 C43 107.44(17) . . ?
C70 C61 C60 120.88(17) . . ?
C70 C61 C62 121.44(18) . . ?
C60 C61 C62 108.34(18) . . ?
C63 C62 C44 120.54(19) . . ?
C63 C62 C61 119.24(18) . . ?
C44 C62 C61 108.54(19) . . ?
C62 C63 C64 120.01(18) . . ?
C62 C63 C47 120.0(2) . . ?
C64 C63 C47 108.33(18) . . ?
C65 C64 C49 121.21(18) . . ?
C65 C64 C63 121.79(18) . . ?
C49 C64 C63 108.02(18) . . ?
C64 C65 C66 116.36(18) . . ?
C64 C65 C70 118.55(18) . . ?
C66 C65 C70 118.40(17) . . ?
C65 C66 C51 121.36(19) . . ?
C65 C66 C67 121.80(18) . . ?
C51 C66 C67 107.68(18) . . ?
C68 C67 C66 119.89(18) . . ?
C68 C67 C53 119.4(2) . . ?
C66 C67 C53 108.98(18) . . ?
C67 C68 C56 120.58(19) . . ?
C67 C68 C69 119.45(18) . . ?
C56 C68 C69 108.28(17) . . ?
C70 C69 C58 121.30(17) . . ?
C70 C69 C68 121.55(17) . . ?
C58 C69 C68 107.67(17) . . ?
C69 C70 C61 116.43(17) . . ?
C69 C70 C65 118.65(17) . . ?
C61 C70 C65 118.67(17) . . ?
S1 C71 S1 180.0 . 17 ?
S2 C72 S2 180.0 17_655 . ?
 
loop_
 _geom_torsion_atom_site_label_1
 _geom_torsion_atom_site_label_2
 _geom_torsion_atom_site_label_3
 _geom_torsion_atom_site_label_4
 _geom_torsion
 _geom_torsion_site_symmetry_1
 _geom_torsion_site_symmetry_2
 _geom_torsion_site_symmetry_3
 _geom_torsion_site_symmetry_4
 _geom_torsion_publ_flag
C6 C1 C2 C3 -13.2(3) . . . . ?
C9 C1 C2 C3 -156.01(17) . . . . ?
C6 C1 C2 C12 138.37(19) . . . . ?
C9 C1 C2 C12 -4.4(3) . . . . ?
C1 C2 C3 C4 13.1(3) . . . . ?
C12 C2 C3 C4 -138.92(19) . . . . ?
C1 C2 C3 C15 155.75(17) . . . . ?
C12 C2 C3 C15 3.7(3) . . . . ?
C2 C3 C4 C5 0.2(3) . . . . ?
C15 C3 C4 C5 -146.92(18) . . . . ?
C2 C3 C4 C17 147.03(18) . . . . ?
C15 C3 C4 C17 -0.1(2) . . . . ?
C3 C4 C5 C6 -13.5(3) . . . . ?
C17 C4 C5 C6 -155.94(18) . . . . ?
C3 C4 C5 C20 138.08(19) . . . . ?
C17 C4 C5 C20 -4.4(3) . . . . ?
C4 C5 C6 C1 13.3(3) . . . . ?
C20 C5 C6 C1 -138.4(2) . . . . ?
C4 C5 C6 C7 155.49(19) . . . . ?
C20 C5 C6 C7 3.8(3) . . . . ?
C2 C1 C6 C5 0.0(3) . . . . ?
C9 C1 C6 C5 147.03(18) . . . . ?
C2 C1 C6 C7 -146.73(18) . . . . ?
C9 C1 C6 C7 0.3(2) . . . . ?
C5 C6 C7 C22 -3.9(3) . . . . ?
C1 C6 C7 C22 142.4(2) . . . . ?
C5 C6 C7 C8 -147.14(19) . . . . ?
C1 C6 C7 C8 -0.8(2) . . . . ?
C22 C7 C8 C25 -0.5(3) . . . . ?
C6 C7 C8 C25 142.6(2) . . . . ?
C22 C7 C8 C9 -142.08(19) . . . . ?
C6 C7 C8 C9 1.1(2) . . . . ?
C25 C8 C9 C10 -0.2(3) . . . . ?
C7 C8 C9 C10 141.35(19) . . . . ?
C25 C8 C9 C1 -142.43(19) . . . . ?
C7 C8 C9 C1 -0.9(2) . . . . ?
C2 C1 C9 C10 4.6(3) . . . . ?
C6 C1 C9 C10 -142.57(19) . . . . ?
C2 C1 C9 C8 147.48(18) . . . . ?
C6 C1 C9 C8 0.4(2) . . . . ?
C8 C9 C10 C11 -138.7(2) . . . . ?
C1 C9 C10 C11 -0.4(3) . . . . ?
C8 C9 C10 C27 0.8(3) . . . . ?
C1 C9 C10 C27 139.1(2) . . . . ?
C9 C10 C11 C12 -3.9(3) . . . . ?
C27 C10 C11 C12 -147.19(18) . . . . ?
C9 C10 C11 C29 142.44(19) . . . . ?
C27 C10 C11 C29 -0.9(2) . . . . ?
C29 C11 C12 C13 13.5(3) . . . . ?
C10 C11 C12 C13 155.63(17) . . . . ?
C29 C11 C12 C2 -138.14(19) . . . . ?
C10 C11 C12 C2 4.0(3) . . . . ?
C1 C2 C12 C13 -150.76(17) . . . . ?
C3 C2 C12 C13 0.4(3) . . . . ?
C1 C2 C12 C11 0.1(2) . . . . ?
C3 C2 C12 C11 151.31(17) . . . . ?
C11 C12 C13 C31 -13.6(3) . . . . ?
C2 C12 C13 C31 137.79(18) . . . . ?
C11 C12 C13 C14 -155.81(17) . . . . ?
C2 C12 C13 C14 -4.4(3) . . . . ?
C12 C13 C14 C15 4.3(3) . . . . ?
C31 C13 C14 C15 -142.22(19) . . . . ?
C12 C13 C14 C33 147.12(17) . . . . ?
C31 C13 C14 C33 0.6(2) . . . . ?
C13 C14 C15 C3 -0.2(3) . . . . ?
C33 C14 C15 C3 -138.85(19) . . . . ?
C13 C14 C15 C16 138.95(19) . . . . ?
C33 C14 C15 C16 0.3(3) . . . . ?
C2 C3 C15 C14 -3.9(3) . . . . ?
C4 C3 C15 C14 142.84(19) . . . . ?
C2 C3 C15 C16 -147.15(17) . . . . ?
C4 C3 C15 C16 -0.4(2) . . . . ?
C14 C15 C16 C35 -0.9(3) . . . . ?
C3 C15 C16 C35 142.43(18) . . . . ?
C14 C15 C16 C17 -142.49(19) . . . . ?
C3 C15 C16 C17 0.8(2) . . . . ?
C35 C16 C17 C18 1.1(3) . . . . ?
C15 C16 C17 C18 142.48(18) . . . . ?
C35 C16 C17 C4 -142.26(19) . . . . ?
C15 C16 C17 C4 -0.9(2) . . . . ?
C5 C4 C17 C18 4.5(3) . . . . ?
C3 C4 C17 C18 -142.49(18) . . . . ?
C5 C4 C17 C16 147.57(18) . . . . ?
C3 C4 C17 C16 0.6(2) . . . . ?
C16 C17 C18 C37 -0.4(3) . . . . ?
C4 C17 C18 C37 138.89(19) . . . . ?
C16 C17 C18 C19 -139.05(19) . . . . ?
C4 C17 C18 C19 0.2(3) . . . . ?
C17 C18 C19 C20 -5.0(3) . . . . ?
C37 C18 C19 C20 -148.26(17) . . . . ?
C17 C18 C19 C39 143.11(17) . . . . ?
C37 C18 C19 C39 -0.1(2) . . . . ?
C39 C19 C20 C21 12.4(2) . . . . ?
C18 C19 C20 C21 156.46(17) . . . . ?
C39 C19 C20 C5 -139.00(19) . . . . ?
C18 C19 C20 C5 5.0(3) . . . . ?
C4 C5 C20 C19 -0.3(3) . . . . ?
C6 C5 C20 C19 150.67(18) . . . . ?
C4 C5 C20 C21 -150.76(18) . . . . ?
C6 C5 C20 C21 0.2(3) . . . . ?
C19 C20 C21 C41 -12.9(3) . . . . ?
C5 C20 C21 C41 138.39(19) . . . . ?
C19 C20 C21 C22 -155.40(17) . . . . ?
C5 C20 C21 C22 -4.2(3) . . . . ?
C6 C7 C22 C23 -138.9(2) . . . . ?
C8 C7 C22 C23 0.0(3) . . . . ?
C6 C7 C22 C21 -0.1(3) . . . . ?
C8 C7 C22 C21 138.8(2) . . . . ?
C41 C21 C22 C7 -142.7(2) . . . . ?
C20 C21 C22 C7 4.1(3) . . . . ?
C41 C21 C22 C23 0.4(2) . . . . ?
C20 C21 C22 C23 147.23(18) . . . . ?
C7 C22 C23 C24 0.5(3) . . . . ?
C21 C22 C23 C24 -142.34(19) . . . . ?
C7 C22 C23 C42 142.17(19) . . . . ?
C21 C22 C23 C42 -0.7(2) . . . . ?
C22 C23 C24 C45 136.9(2) . . . . ?
C42 C23 C24 C45 0.3(3) . . . . ?
C22 C23 C24 C25 -0.6(3) . . . . ?
C42 C23 C24 C25 -137.2(2) . . . . ?
C9 C8 C25 C26 -0.4(3) . . . . ?
C7 C8 C25 C26 -137.2(2) . . . . ?
C9 C8 C25 C24 137.2(2) . . . . ?
C7 C8 C25 C24 0.5(3) . . . . ?
C23 C24 C25 C8 0.0(3) . . . . ?
C45 C24 C25 C8 -141.9(2) . . . . ?
C23 C24 C25 C26 141.8(2) . . . . ?
C45 C24 C25 C26 -0.2(2) . . . . ?
C8 C25 C26 C27 0.5(3) . . . . ?
C24 C25 C26 C27 -141.6(2) . . . . ?
C8 C25 C26 C46 142.27(19) . . . . ?
C24 C25 C26 C46 0.2(2) . . . . ?
C25 C26 C27 C28 137.0(2) . . . . ?
C46 C26 C27 C28 -0.1(3) . . . . ?
C25 C26 C27 C10 0.1(3) . . . . ?
C46 C26 C27 C10 -137.0(2) . . . . ?
C9 C10 C27 C26 -0.7(3) . . . . ?
C11 C10 C27 C26 143.10(19) . . . . ?
C9 C10 C27 C28 -142.79(18) . . . . ?
C11 C10 C27 C28 1.1(2) . . . . ?
C26 C27 C28 C48 0.1(3) . . . . ?
C10 C27 C28 C48 142.07(18) . . . . ?
C26 C27 C28 C29 -142.84(19) . . . . ?
C10 C27 C28 C29 -0.9(2) . . . . ?
C12 C11 C29 C30 -0.2(3) . . . . ?
C10 C11 C29 C30 -146.67(18) . . . . ?
C12 C11 C29 C28 146.79(18) . . . . ?
C10 C11 C29 C28 0.3(2) . . . . ?
C48 C28 C29 C30 4.4(3) . . . . ?
C27 C28 C29 C30 147.25(18) . . . . ?
C48 C28 C29 C11 -142.55(19) . . . . ?
C27 C28 C29 C11 0.3(2) . . . . ?
C11 C29 C30 C31 -13.0(3) . . . . ?
C28 C29 C30 C31 -155.49(17) . . . . ?
C11 C29 C30 C50 137.84(19) . . . . ?
C28 C29 C30 C50 -4.6(3) . . . . ?
C29 C30 C31 C13 12.9(3) . . . . ?
C50 C30 C31 C13 -138.01(19) . . . . ?
C29 C30 C31 C32 155.57(17) . . . . ?
C50 C30 C31 C32 4.7(3) . . . . ?
C12 C13 C31 C30 0.4(3) . . . . ?
C14 C13 C31 C30 147.09(17) . . . . ?
C12 C13 C31 C32 -146.60(17) . . . . ?
C14 C13 C31 C32 0.1(2) . . . . ?
C30 C31 C32 C52 -4.3(3) . . . . ?
C13 C31 C32 C52 142.49(18) . . . . ?
C30 C31 C32 C33 -147.45(18) . . . . ?
C13 C31 C32 C33 -0.7(2) . . . . ?
C15 C14 C33 C34 0.5(3) . . . . ?
C13 C14 C33 C34 -142.17(18) . . . . ?
C15 C14 C33 C32 141.72(18) . . . . ?
C13 C14 C33 C32 -1.0(2) . . . . ?
C52 C32 C33 C34 -0.3(3) . . . . ?
C31 C32 C33 C34 142.70(19) . . . . ?
C52 C32 C33 C14 -142.03(19) . . . . ?
C31 C32 C33 C14 1.0(2) . . . . ?
C14 C33 C34 C54 136.4(2) . . . . ?
C32 C33 C34 C54 0.0(3) . . . . ?
C14 C33 C34 C35 -0.7(3) . . . . ?
C32 C33 C34 C35 -137.2(2) . . . . ?
C17 C16 C35 C34 136.9(2) . . . . ?
C15 C16 C35 C34 0.6(3) . . . . ?
C17 C16 C35 C36 -1.3(3) . . . . ?
C15 C16 C35 C36 -137.6(2) . . . . ?
C33 C34 C35 C16 0.2(3) . . . . ?
C54 C34 C35 C16 -141.55(19) . . . . ?
C33 C34 C35 C36 142.56(18) . . . . ?
C54 C34 C35 C36 0.8(2) . . . . ?
C16 C35 C36 C37 0.9(3) . . . . ?
C34 C35 C36 C37 -142.00(19) . . . . ?
C16 C35 C36 C55 142.17(19) . . . . ?
C34 C35 C36 C55 -0.7(2) . . . . ?
C55 C36 C37 C18 -136.99(19) . . . . ?
C35 C36 C37 C18 -0.2(3) . . . . ?
C55 C36 C37 C38 0.2(3) . . . . ?
C35 C36 C37 C38 137.03(19) . . . . ?
C17 C18 C37 C36 -0.1(3) . . . . ?
C19 C18 C37 C36 142.52(17) . . . . ?
C17 C18 C37 C38 -141.83(18) . . . . ?
C19 C18 C37 C38 0.7(2) . . . . ?
C36 C37 C38 C57 -0.3(3) . . . . ?
C18 C37 C38 C57 141.52(18) . . . . ?
C36 C37 C38 C39 -142.84(17) . . . . ?
C18 C37 C38 C39 -1.1(2) . . . . ?
C20 C19 C39 C40 0.7(3) . . . . ?
C18 C19 C39 C40 -147.67(17) . . . . ?
C20 C19 C39 C38 147.80(17) . . . . ?
C18 C19 C39 C38 -0.53(19) . . . . ?
C57 C38 C39 C40 5.0(3) . . . . ?
C37 C38 C39 C40 148.08(16) . . . . ?
C57 C38 C39 C19 -142.05(17) . . . . ?
C37 C38 C39 C19 0.98(19) . . . . ?
C19 C39 C40 C41 -13.3(2) . . . . ?
C38 C39 C40 C41 -155.98(16) . . . . ?
C19 C39 C40 C59 137.90(18) . . . . ?
C38 C39 C40 C59 -4.7(2) . . . . ?
C39 C40 C41 C21 12.9(3) . . . . ?
C59 C40 C41 C21 -138.35(19) . . . . ?
C39 C40 C41 C42 155.29(17) . . . . ?
C59 C40 C41 C42 4.1(3) . . . . ?
C20 C21 C41 C40 0.2(3) . . . . ?
C22 C21 C41 C40 146.91(18) . . . . ?
C20 C21 C41 C42 -146.51(18) . . . . ?
C22 C21 C41 C42 0.2(2) . . . . ?
C24 C23 C42 C43 -0.4(3) . . . . ?
C22 C23 C42 C43 -142.02(19) . . . . ?
C24 C23 C42 C41 142.47(19) . . . . ?
C22 C23 C42 C41 0.8(2) . . . . ?
C40 C41 C42 C43 -4.6(3) . . . . ?
C21 C41 C42 C43 142.18(19) . . . . ?
C40 C41 C42 C23 -147.34(18) . . . . ?
C21 C41 C42 C23 -0.6(2) . . . . ?
C23 C42 C43 C44 -0.2(3) . . . . ?
C41 C42 C43 C44 -138.77(19) . . . . ?
C23 C42 C43 C60 138.99(19) . . . . ?
C41 C42 C43 C60 0.5(3) . . . . ?
C42 C43 C44 C45 0.9(3) . . . . ?
C60 C43 C44 C45 -142.34(19) . . . . ?
C42 C43 C44 C62 141.94(19) . . . . ?
C60 C43 C44 C62 -1.3(2) . . . . ?
C62 C44 C45 C46 0.0(3) . . . . ?
C43 C44 C45 C46 136.4(2) . . . . ?
C62 C44 C45 C24 -137.4(2) . . . . ?
C43 C44 C45 C24 -0.9(3) . . . . ?
C23 C24 C45 C44 0.3(3) . . . . ?
C25 C24 C45 C44 142.2(2) . . . . ?
C23 C24 C45 C46 -141.8(2) . . . . ?
C25 C24 C45 C46 0.0(2) . . . . ?
C44 C45 C46 C47 0.1(3) . . . . ?
C24 C45 C46 C47 141.7(2) . . . . ?
C44 C45 C46 C26 -141.5(2) . . . . ?
C24 C45 C46 C26 0.1(2) . . . . ?
C27 C26 C46 C47 -0.1(3) . . . . ?
C25 C26 C46 C47 -142.14(19) . . . . ?
C27 C26 C46 C45 141.9(2) . . . . ?
C25 C26 C46 C45 -0.2(2) . . . . ?
C45 C46 C47 C48 -137.2(2) . . . . ?
C26 C46 C47 C48 0.3(3) . . . . ?
C45 C46 C47 C63 -0.2(3) . . . . ?
C26 C46 C47 C63 137.3(2) . . . . ?
C27 C28 C48 C47 0.2(3) . . . . ?
C29 C28 C48 C47 139.0(2) . . . . ?
C27 C28 C48 C49 -138.65(19) . . . . ?
C29 C28 C48 C49 0.2(3) . . . . ?
C46 C47 C48 C28 -0.4(3) . . . . ?
C63 C47 C48 C28 -142.07(19) . . . . ?
C46 C47 C48 C49 142.48(19) . . . . ?
C63 C47 C48 C49 0.8(2) . . . . ?
C28 C48 C49 C50 -4.4(3) . . . . ?
C47 C48 C49 C50 -147.66(18) . . . . ?
C28 C48 C49 C64 142.76(18) . . . . ?
C47 C48 C49 C64 -0.5(2) . . . . ?
C64 C49 C50 C51 13.3(3) . . . . ?
C48 C49 C50 C51 156.32(17) . . . . ?
C64 C49 C50 C30 -139.03(19) . . . . ?
C48 C49 C50 C30 4.0(3) . . . . ?
C29 C30 C50 C51 -151.26(17) . . . . ?
C31 C30 C50 C51 -0.9(3) . . . . ?
C29 C30 C50 C49 0.5(2) . . . . ?
C31 C30 C50 C49 150.80(17) . . . . ?
C49 C50 C51 C66 -13.4(3) . . . . ?
C30 C50 C51 C66 138.83(19) . . . . ?
C49 C50 C51 C52 -155.39(17) . . . . ?
C30 C50 C51 C52 -3.2(3) . . . . ?
C31 C32 C52 C53 -138.88(19) . . . . ?
C33 C32 C52 C53 -0.1(3) . . . . ?
C31 C32 C52 C51 0.1(3) . . . . ?
C33 C32 C52 C51 138.91(19) . . . . ?
C50 C51 C52 C32 3.6(3) . . . . ?
C66 C51 C52 C32 -142.57(18) . . . . ?
C50 C51 C52 C53 146.67(18) . . . . ?
C66 C51 C52 C53 0.5(2) . . . . ?
C32 C52 C53 C54 0.8(3) . . . . ?
C51 C52 C53 C54 -142.09(18) . . . . ?
C32 C52 C53 C67 142.46(18) . . . . ?
C51 C52 C53 C67 -0.5(2) . . . . ?
C52 C53 C54 C34 -1.2(3) . . . . ?
C67 C53 C54 C34 -137.7(2) . . . . ?
C52 C53 C54 C55 137.2(2) . . . . ?
C67 C53 C54 C55 0.7(3) . . . . ?
C33 C34 C54 C53 0.8(3) . . . . ?
C35 C34 C54 C53 142.00(19) . . . . ?
C33 C34 C54 C55 -141.92(19) . . . . ?
C35 C34 C54 C55 -0.7(2) . . . . ?
C53 C54 C55 C56 0.1(3) . . . . ?
C34 C54 C55 C56 142.65(19) . . . . ?
C53 C54 C55 C36 -142.3(2) . . . . ?
C34 C54 C55 C36 0.2(2) . . . . ?
C37 C36 C55 C56 -0.4(3) . . . . ?
C35 C36 C55 C56 -141.99(19) . . . . ?
C37 C36 C55 C54 141.83(18) . . . . ?
C35 C36 C55 C54 0.3(2) . . . . ?
C54 C55 C56 C57 -137.1(2) . . . . ?
C36 C55 C56 C57 0.7(3) . . . . ?
C54 C55 C56 C68 -0.6(3) . . . . ?
C36 C55 C56 C68 137.23(19) . . . . ?
C37 C38 C57 C58 -138.60(18) . . . . ?
C39 C38 C57 C58 -0.3(3) . . . . ?
C37 C38 C57 C56 0.5(3) . . . . ?
C39 C38 C57 C56 138.83(17) . . . . ?
C55 C56 C57 C38 -0.7(3) . . . . ?
C68 C56 C57 C38 -142.16(17) . . . . ?
C55 C56 C57 C58 142.58(18) . . . . ?
C68 C56 C57 C58 1.1(2) . . . . ?
C38 C57 C58 C59 -4.7(3) . . . . ?
C56 C57 C58 C59 -147.99(16) . . . . ?
C38 C57 C58 C69 142.48(17) . . . . ?
C56 C57 C58 C69 -0.8(2) . . . . ?
C69 C58 C59 C60 12.4(2) . . . . ?
C57 C58 C59 C60 155.57(16) . . . . ?
C69 C58 C59 C40 -138.24(17) . . . . ?
C57 C58 C59 C40 4.9(2) . . . . ?
C39 C40 C59 C60 -150.08(17) . . . . ?
C41 C40 C59 C60 0.4(2) . . . . ?
C39 C40 C59 C58 -0.2(2) . . . . ?
C41 C40 C59 C58 150.31(17) . . . . ?
C58 C59 C60 C61 -12.8(2) . . . . ?
C40 C59 C60 C61 137.72(18) . . . . ?
C58 C59 C60 C43 -155.05(16) . . . . ?
C40 C59 C60 C43 -4.5(2) . . . . ?
C42 C43 C60 C59 4.1(3) . . . . ?
C44 C43 C60 C59 147.71(17) . . . . ?
C42 C43 C60 C61 -142.74(19) . . . . ?
C44 C43 C60 C61 0.9(2) . . . . ?
C59 C60 C61 C70 0.1(3) . . . . ?
C43 C60 C61 C70 146.90(16) . . . . ?
C59 C60 C61 C62 -146.89(17) . . . . ?
C43 C60 C61 C62 -0.1(2) . . . . ?
C45 C44 C62 C63 0.0(3) . . . . ?
C43 C44 C62 C63 -141.50(18) . . . . ?
C45 C44 C62 C61 142.79(18) . . . . ?
C43 C44 C62 C61 1.2(2) . . . . ?
C70 C61 C62 C63 -4.2(3) . . . . ?
C60 C61 C62 C63 142.59(18) . . . . ?
C70 C61 C62 C44 -147.49(17) . . . . ?
C60 C61 C62 C44 -0.7(2) . . . . ?
C44 C62 C63 C64 138.72(19) . . . . ?
C61 C62 C63 C64 -0.2(3) . . . . ?
C44 C62 C63 C47 -0.2(3) . . . . ?
C61 C62 C63 C47 -139.03(19) . . . . ?
C46 C47 C63 C62 0.3(3) . . . . ?
C48 C47 C63 C62 142.31(19) . . . . ?
C46 C47 C63 C64 -142.87(19) . . . . ?
C48 C47 C63 C64 -0.8(2) . . . . ?
C50 C49 C64 C65 -0.2(3) . . . . ?
C48 C49 C64 C65 -147.65(18) . . . . ?
C50 C49 C64 C63 147.47(18) . . . . ?
C48 C49 C64 C63 0.0(2) . . . . ?
C62 C63 C64 C65 4.8(3) . . . . ?
C47 C63 C64 C65 147.93(18) . . . . ?
C62 C63 C64 C49 -142.62(19) . . . . ?
C47 C63 C64 C49 0.5(2) . . . . ?
C49 C64 C65 C66 -12.7(3) . . . . ?
C63 C64 C65 C66 -155.90(18) . . . . ?
C49 C64 C65 C70 138.22(19) . . . . ?
C63 C64 C65 C70 -5.0(3) . . . . ?
C64 C65 C66 C51 12.6(3) . . . . ?
C70 C65 C66 C51 -138.40(18) . . . . ?
C64 C65 C66 C67 155.33(18) . . . . ?
C70 C65 C66 C67 4.4(3) . . . . ?
C50 C51 C66 C65 0.5(3) . . . . ?
C52 C51 C66 C65 147.07(18) . . . . ?
C50 C51 C66 C67 -146.85(18) . . . . ?
C52 C51 C66 C67 -0.3(2) . . . . ?
C65 C66 C67 C68 -4.4(3) . . . . ?
C51 C66 C67 C68 142.82(19) . . . . ?
C65 C66 C67 C53 -147.19(18) . . . . ?
C51 C66 C67 C53 0.0(2) . . . . ?
C54 C53 C67 C68 -0.9(3) . . . . ?
C52 C53 C67 C68 -142.74(18) . . . . ?
C54 C53 C67 C66 142.1(2) . . . . ?
C52 C53 C67 C66 0.3(2) . . . . ?
C66 C67 C68 C56 -138.60(19) . . . . ?
C53 C67 C68 C56 0.4(3) . . . . ?
C66 C67 C68 C69 0.2(3) . . . . ?
C53 C67 C68 C69 139.17(19) . . . . ?
C55 C56 C68 C67 0.3(3) . . . . ?
C57 C56 C68 C67 141.77(18) . . . . ?
C55 C56 C68 C69 -142.48(18) . . . . ?
C57 C56 C68 C69 -1.0(2) . . . . ?
C59 C58 C69 C70 0.7(3) . . . . ?
C57 C58 C69 C70 -146.64(16) . . . . ?
C59 C58 C69 C68 147.51(16) . . . . ?
C57 C58 C69 C68 0.13(19) . . . . ?
C67 C68 C69 C70 3.9(3) . . . . ?
C56 C68 C69 C70 147.23(17) . . . . ?
C67 C68 C69 C58 -142.73(18) . . . . ?
C56 C68 C69 C58 0.56(19) . . . . ?
C58 C69 C70 C61 -13.5(2) . . . . ?
C68 C69 C70 C61 -155.72(16) . . . . ?
C58 C69 C70 C65 138.40(18) . . . . ?
C68 C69 C70 C65 -3.8(2) . . . . ?
C60 C61 C70 C69 13.1(2) . . . . ?
C62 C61 C70 C69 155.79(17) . . . . ?
C60 C61 C70 C65 -138.80(18) . . . . ?
C62 C61 C70 C65 3.9(3) . . . . ?
C64 C65 C70 C69 -150.62(17) . . . . ?
C66 C65 C70 C69 -0.3(2) . . . . ?
C64 C65 C70 C61 0.7(2) . . . . ?
C66 C65 C70 C61 150.97(17) . . . . ?
 
_refine_diff_density_max    0.502
_refine_diff_density_min   -0.381
_refine_diff_density_rms    0.072

_shelxl_version_number 2014-3

_shelx_res_file
;
TITL KBG19 in Fddd 'C70 . 0.68 I2 . 0.32 CS2'
CELL 0.71073  28.31600  28.31830  34.19610  90.0000  90.0000  90.0000
ZERR   32.00   0.00490   0.00490   0.00590   0.0000   0.0000   0.0000
LATT  4
SYMM 0.75-X, 0.75-Y, Z
SYMM 0.75-X, Y, 0.75-Z
SYMM X, 0.75-Y, 0.75-Z
SFAC  C I S
UNIT  2250.17   43.67    20.33
SIZE 0.301 0.237 0.169 !black block
TEMP -183

L.S. 12
BOND
CONF
ACTA
TWIN 0 1 0 -1 0 0 0 0 1
EQIV $1 -0.25+x, -y, -0.25+z
EQIV $2 0.25-x, y, 0.25-z
RTAB BOND C24 I2_$1
RTAB BOND C34 I1_$2

WGHT    0.022300   75.763794
BASF   0.24625
FVAR       0.00795   0.68310   0.68142
C1    1    0.188137   -0.102232   -0.036675    11.00000    0.02582    0.01602 =
         0.03764   -0.00398   -0.01177   -0.00848
C2    1    0.169712   -0.094096    0.001195    11.00000    0.01798    0.01610 =
         0.04299    0.00396   -0.00502   -0.00911
C3    1    0.197670   -0.110150    0.033064    11.00000    0.02269    0.01220 =
         0.04149    0.00732   -0.00068   -0.00706
C4    1    0.245751   -0.124085    0.027252    11.00000    0.02609    0.00951 =
         0.03753    0.00401   -0.00368   -0.00226
C5    1    0.267236   -0.122308   -0.010126    11.00000    0.02636    0.00869 =
         0.03997   -0.00462   -0.00331    0.00358
C6    1    0.236475   -0.116231   -0.042489    11.00000    0.03292    0.01231 =
         0.03576   -0.00966   -0.00670   -0.00273
C7    1    0.252611   -0.095915   -0.078880    11.00000    0.04240    0.02349 =
         0.02630   -0.01670   -0.00266   -0.00210
C8    1    0.213696   -0.069592   -0.096166    11.00000    0.04264    0.03222 =
         0.02282   -0.01373   -0.01148   -0.00561
C9    1    0.174042   -0.073290   -0.069689    11.00000    0.03296    0.02569 =
         0.03553   -0.00561   -0.01955   -0.00972
C10   1    0.144505   -0.034928   -0.063303    11.00000    0.02274    0.02930 =
         0.03939    0.00003   -0.01955   -0.00753
C11   1    0.127795   -0.024110   -0.024585    11.00000    0.01141    0.02823 =
         0.04491    0.00275   -0.01098   -0.00479
C12   1    0.138567   -0.053833    0.007769    11.00000    0.00986    0.02152 =
         0.04686    0.00592   -0.00330   -0.00776
C13   1    0.137673   -0.032336    0.045251    11.00000    0.01155    0.02839 =
         0.04203    0.00717    0.00711   -0.00331
C14   1    0.164363   -0.051493    0.077645    11.00000    0.01877    0.03316 =
         0.03168    0.01214    0.01072   -0.00565
C15   1    0.193754   -0.089536    0.071588    11.00000    0.02628    0.02283 =
         0.03227    0.01204    0.00643   -0.00761
C16   1    0.239977   -0.090960    0.090200    11.00000    0.02858    0.02555 =
         0.02758    0.01660    0.00089   -0.00423
C17   1    0.271888   -0.112029    0.062274    11.00000    0.02837    0.01503 =
         0.03198    0.01192   -0.00547    0.00110
C18   1    0.317898   -0.095251    0.059396    11.00000    0.02276    0.01868 =
         0.03260    0.00806   -0.00738    0.00602
C19   1    0.338994   -0.089924    0.021154    11.00000    0.01606    0.01697 =
         0.03828    0.00131   -0.00419    0.00816
C20   1    0.315525   -0.104754   -0.013333    11.00000    0.02120    0.01497 =
         0.04011   -0.00649    0.00088    0.00847
C21   1    0.330045   -0.082084   -0.048591    11.00000    0.02479    0.02507 =
         0.03283   -0.01245    0.00598    0.00753
C22   1    0.298502   -0.079148   -0.082030    11.00000    0.03740    0.03179 =
         0.02580   -0.01826    0.00596    0.00254
C23   1    0.307883   -0.035405   -0.102524    11.00000    0.04024    0.04236 =
         0.02028   -0.01365    0.01170   -0.00199
C24   1    0.270653   -0.009575   -0.118988    11.00000    0.04539    0.04823 =
         0.01236   -0.00794    0.00174   -0.00519
C25   1    0.222461   -0.027227   -0.115672    11.00000    0.04778    0.04483 =
         0.01388   -0.00862   -0.01083   -0.00765
C26   1    0.191270    0.012694   -0.109291    11.00000    0.04179    0.04064 =
         0.01954    0.00210   -0.01963   -0.00298
C27   1    0.153355    0.008912   -0.083850    11.00000    0.02773    0.03544 =
         0.03042    0.00406   -0.02073   -0.00392
C28   1    0.142665    0.046624   -0.056870    11.00000    0.01797    0.02992 =
         0.03794    0.00772   -0.01569    0.00313
C29   1    0.126722    0.026137   -0.020336    11.00000    0.00905    0.02664 =
         0.04408    0.00843   -0.00661    0.00168
C30   1    0.136148    0.048056    0.016121    11.00000    0.01072    0.02559 =
         0.04390    0.00122    0.00254    0.00712
C31   1    0.136634    0.018113    0.049451    11.00000    0.01170    0.02941 =
         0.04011    0.00326    0.01076    0.00369
C32   1    0.162706    0.030507    0.084427    11.00000    0.02303    0.03450 =
         0.02971   -0.00425    0.01504    0.00347
C33   1    0.179690   -0.012831    0.102438    11.00000    0.02750    0.03493 =
         0.02268    0.00422    0.01582   -0.00068
C34   1    0.224230   -0.013597    0.120043    11.00000    0.03470    0.04176 =
         0.01562    0.00689    0.01092   -0.00226
C35   1    0.254664   -0.053746    0.113598    11.00000    0.03707    0.03306 =
         0.01254    0.01047    0.00094   -0.00459
C36   1    0.302957   -0.036645    0.110398    11.00000    0.03294    0.03422 =
         0.01510    0.01045   -0.00905   -0.00341
C37   1    0.333798   -0.057148    0.083675    11.00000    0.02198    0.02954 =
         0.02506    0.01092   -0.01136    0.00142
C38   1    0.364423   -0.027597    0.060373    11.00000    0.01369    0.02657 =
         0.02931    0.00629   -0.01128    0.00079
C39   1    0.367927   -0.048457    0.021612    11.00000    0.01051    0.02380 =
         0.03595    0.00085   -0.00324    0.00740
C40   1    0.373900   -0.020389   -0.012080    11.00000    0.00810    0.02614 =
         0.03411   -0.00132    0.00462    0.00311
C41   1    0.358584   -0.040684   -0.047965    11.00000    0.01760    0.03304 =
         0.02970   -0.00810    0.00964    0.00727
C42   1    0.345044   -0.011272   -0.081053    11.00000    0.02794    0.04050 =
         0.02140   -0.00436    0.01466   -0.00031
C43   1    0.343751    0.036987   -0.077111    11.00000    0.02670    0.03797 =
         0.02023    0.00351    0.01225   -0.00650
C44   1    0.305624    0.064147   -0.094357    11.00000    0.03589    0.03740 =
         0.01464    0.00994    0.00628   -0.00855
C45   1    0.269340    0.041516   -0.114753    11.00000    0.04668    0.04354 =
         0.01058    0.00650    0.00022   -0.00696
C46   1    0.220612    0.055316   -0.108837    11.00000    0.03999    0.04067 =
         0.01788    0.01201   -0.01121   -0.00332
C47   1    0.209772    0.091286   -0.082832    11.00000    0.03393    0.02809 =
         0.02540    0.01492   -0.01163   -0.00172
C48   1    0.170404    0.086786   -0.056462    11.00000    0.02299    0.02459 =
         0.03876    0.01278   -0.01244    0.00437
C49   1    0.183368    0.107909   -0.019452    11.00000    0.02167    0.01506 =
         0.04102    0.00653   -0.00545    0.00724
C50   1    0.165753    0.090464    0.016624    11.00000    0.01714    0.01822 =
         0.04174    0.00009    0.00265    0.00979
C51   1    0.192911    0.100191    0.050316    11.00000    0.02275    0.01695 =
         0.03614   -0.00497    0.00791    0.00651
C52   1    0.190314    0.070654    0.084907    11.00000    0.02973    0.02710 =
         0.02685   -0.00696    0.01474    0.00576
C53   1    0.236092    0.069628    0.103358    11.00000    0.03724    0.02931 =
         0.01749   -0.00980    0.00923    0.00112
C54   1    0.253015    0.028289    0.120291    11.00000    0.03998    0.03796 =
         0.01065   -0.00409    0.00451   -0.00070
C55   1    0.301804    0.014341    0.114445    11.00000    0.03519    0.03495 =
         0.01193    0.00045   -0.00663   -0.00399
C56   1    0.331431    0.042274    0.092045    11.00000    0.02856    0.02913 =
         0.01756   -0.00289   -0.01028   -0.00553
C57   1    0.363262    0.020659    0.064237    11.00000    0.01590    0.02835 =
         0.02437    0.00103   -0.01077   -0.00229
C58   1    0.365708    0.050335    0.029990    11.00000    0.01207    0.02255 =
         0.02825    0.00046   -0.00525   -0.00655
C59   1    0.372866    0.030950   -0.007935    11.00000    0.00843    0.02621 =
         0.03005    0.00048    0.00296   -0.00424
C60   1    0.356342    0.058495   -0.039732    11.00000    0.01568    0.02638 =
         0.02528    0.00242    0.00675   -0.00843
C61   1    0.325677    0.098026   -0.033922    11.00000    0.02153    0.01939 =
         0.02430    0.00642    0.00157   -0.00994
C62   1    0.294145    0.101387   -0.067368    11.00000    0.03093    0.02296 =
         0.02219    0.01135    0.00092   -0.00833
C63   1    0.247492    0.114829   -0.061516    11.00000    0.03292    0.01787 =
         0.02629    0.01112   -0.00521   -0.00290
C64   1    0.230830    0.125129   -0.022679    11.00000    0.02530    0.01085 =
         0.03390    0.00772   -0.00465    0.00167
C65   1    0.261588    0.125430    0.009941    11.00000    0.02382    0.00878 =
         0.03063   -0.00034   -0.00136   -0.00302
C66   1    0.240537    0.117374    0.046942    11.00000    0.02842    0.01265 =
         0.02910   -0.00574    0.00242    0.00337
C67   1    0.267128    0.098695    0.079420    11.00000    0.03232    0.02001 =
         0.02278   -0.01219    0.00055   -0.00073
C68   1    0.313566    0.085195    0.074163    11.00000    0.02899    0.02222 =
         0.01949   -0.00721   -0.00548   -0.00827
C69   1    0.335180    0.090118    0.035809    11.00000    0.01892    0.01750 =
         0.02363   -0.00180   -0.00384   -0.00853
C70   1    0.310711    0.111134    0.004193    11.00000    0.02054    0.01199 =
         0.02648    0.00120   -0.00104   -0.00721
PART   1
I1    2    0.005761    0.000142    0.038784    21.00000    0.01564    0.01341 =
         0.00874    0.00078   -0.00161   -0.00187
PART   2
S1    3    0.012186   -0.003702    0.043814   -21.00000    0.04998    0.03259 =
         0.00544    0.00305   -0.00772   -0.00486
C71   1    0.000000    0.000000    0.000000   -20.50000    0.01674    0.01681 =
         0.02572   -0.00032   -0.00297    0.00332
PART   3
I2    2    0.500751    0.001943    0.039228    31.00000    0.01577    0.01337 =
         0.01089    0.00035    0.00286   -0.00104
PART   4
S2    3    0.491299    0.001227    0.043681   -31.00000    0.03413    0.03432 =
         0.00970   -0.00146   -0.00101   -0.00024
C72   1    0.500000    0.000000    0.000000   -30.50000    0.02217    0.02647 =
         0.01955    0.00339   -0.00035   -0.00161
PART   0
HKLF 4

REM  KBG19 in Fddd 'C70 . 0.68 I2 . 0.32 CS2'
REM R1 =  0.0288 for   11000 Fo > 4sig(Fo)  and  0.0364 for all   12489 data
REM    682 parameters refined using      0 restraints

END

WGHT      0.0223     75.7726

REM Highest difference peak  0.502,  deepest hole -0.381,  1-sigma level  0.072
Q1    1  -0.0195 -0.0024  0.0493  11.00000  0.05    0.50
Q2    1   0.2785  0.0258  0.1129  11.00000  0.05    0.46
Q3    1   0.1682  0.0915 -0.0047  11.00000  0.05    0.44
Q4    1   0.3605 -0.0239 -0.0696  11.00000  0.05    0.43
Q5    1   0.1799  0.0790  0.0674  11.00000  0.05    0.43
Q6    1   0.1395  0.0436 -0.0045  11.00000  0.05    0.43
Q7    1   0.2411  0.0503 -0.1196  11.00000  0.05    0.42
Q8    1   0.1512 -0.0439  0.0644  11.00000  0.05    0.42
Q9    1   0.1505  0.0390  0.0677  11.00000  0.05    0.42
Q10   1   0.2155  0.0039 -0.1183  11.00000  0.05    0.41
Q11   1   0.1706  0.0023 -0.0968  11.00000  0.05    0.41
Q12   1   0.2339  0.0381  0.1123  11.00000  0.05    0.41
Q13   1   0.2791 -0.0298  0.1143  11.00000  0.05    0.39
Q14   1   0.1365  0.0276 -0.0394  11.00000  0.05    0.39
Q15   1   0.3126 -0.0892 -0.0705  11.00000  0.05    0.38
Q16   1   0.1585  0.0478 -0.0767  11.00000  0.05    0.38
Q17   1   0.2056 -0.0033  0.1107  11.00000  0.05    0.37
Q18   1   0.2194 -0.0830  0.0843  11.00000  0.05    0.37
Q19   1   0.2194  0.0803  0.0914  11.00000  0.05    0.37
Q20   1   0.3479 -0.0360  0.0751  11.00000  0.05    0.37
;
_shelx_res_checksum    9261

_shelx_hkl_file
;
   4   0   0  268.62    5.60
   4   0   0  269.69    5.68
   4   0   0  258.58    5.58
   6   0   0   -0.32    0.03
   6   0   0   -0.29    0.02
   6   0   0   -0.26    0.03
   6   0   0   -0.26    0.02
   8   0   0  432.49    9.11
   8   0   0  420.90    9.01
   8   0   0  405.96    8.81
  10   0   0   -0.06    0.03
  10   0   0   -0.09    0.03
  10   0   0   -0.05    0.02
  10   0   0   -0.13    0.02
  12   0   0  240.01    5.15
  12   0   0  243.62    5.22
  12   0   0  257.05    5.32
  12   0   0  249.59    5.17
  14   0   0    0.01    0.03
  14   0   0   -0.03    0.03
  14   0   0   -0.03    0.03
  14   0   0   -0.04    0.03
  16   0   0  276.01    5.86
  16   0   0  273.61    5.95
  16   0   0  292.61    6.05
  16   0   0  280.97    5.89
  18   0   0    0.04    0.04
  18   0   0    0.01    0.05
  18   0   0    0.01    0.03
  18   0   0    0.06    0.05
  20   0   0   75.26    1.72
  20   0   0   73.95    1.71
 -20   0   0   77.46    1.68
  20   0   0   77.80    1.74
  20   0   0   75.71    1.68
  22   0   0    0.08    0.06
  22   0   0    0.07    0.06
  22   0   0    0.10    0.05
 -22   0   0    0.04    0.05
  24   0   0   58.24    1.35
  24   0   0   55.89    1.36
 -24   0   0   57.97    1.32
  24   0   0   56.76    1.38
  26   0   0    0.03    0.06
 -26   0   0    0.14    0.06
  26   0   0    0.02    0.05
  26   0   0    0.06    0.06
  28   0   0   14.77    0.51
  28   0   0   14.56    0.49
 -28   0   0   14.62    0.45
  30   0   0    0.06    0.07
  30   0   0   -0.04    0.06
 -30   0   0    0.02    0.06
  32   0   0   21.79    0.69
  32   0   0   22.07    0.70
  34   0   0    0.11    0.08
  34   0   0    0.06    0.08
  36   0   0   24.53    0.79
  36   0   0   25.10    0.81
 -38   0   0    0.02    0.10
  38   0   0    0.03    0.10
 -40   0   0    5.93    0.39
 -42   0   0    0.07    0.13
   2  -2   0    0.00    0.01
   2   2   0    0.00    0.01
   2   2   0    0.01    0.01
   2  -2   0    0.01    0.01
   4  -2   0   -0.74    0.03
   4  -2   0   -0.68    0.03
   4  -2   0   -0.75    0.03
   4   2   0   -0.77    0.03
   4   2   0   -0.77    0.03
  -4  -2   0   -0.81    0.03
   6   2   0   -0.08    0.02
   6   2   0   -0.08    0.02
   6  -2   0   -0.08    0.02
   6  -2   0   -0.04    0.03
   6   2   0   -0.07    0.02
   6  -2   0   -0.07    0.02
   6   2   0   -0.07    0.02
   6  -2   0   -0.12    0.02
   8   2   0   -0.11    0.03
   8   2   0   -0.17    0.02
   8   2   0   -0.14    0.03
   8  -2   0   -0.19    0.02
   8   2   0   -0.16    0.02
   8  -2   0   -0.16    0.03
   8  -2   0   -0.18    0.02
   8  -2   0   -0.17    0.03
  10  -2   0    0.15    0.04
  10  -2   0    0.10    0.04
  10   2   0    0.18    0.05
  10  -2   0    0.13    0.04
  10   2   0    0.10    0.03
  10   2   0    0.17    0.03
  10  -2   0    0.16    0.04
  10   2   0    0.13    0.04
  12  -2   0   -0.08    0.03
  12   2   0   -0.10    0.03
  12   2   0   -0.03    0.03
  12  -2   0   -0.05    0.03
  12  -2   0   -0.06    0.03
  12  -2   0   -0.04    0.03
  12   2   0   -0.09    0.02
  12   2   0   -0.04    0.03
  14   2   0    2.05    0.11
  14   2   0    1.91    0.09
  14  -2   0    1.95    0.11
  14  -2   0    2.08    0.12
  14  -2   0    2.24    0.12
  14   2   0    2.21    0.13
  14  -2   0    1.92    0.10
  14   2   0    1.84    0.12
  16  -2   0   -0.09    0.03
  16  -2   0   -0.06    0.03
  16   2   0    0.07    0.04
  16   2   0   -0.07    0.03
  16  -2   0   -0.04    0.03
  16  -2   0    0.01    0.04
  16   2   0   -0.01    0.04
  16   2   0   -0.02    0.03
  18   2   0    0.33    0.06
  18  -2   0    0.33    0.07
  18   2   0    0.33    0.07
  18  -2   0    0.38    0.06
  18   2   0    0.22    0.05
  18  -2   0    0.26    0.05
  18  -2   0    0.31    0.07
  18   2   0    0.17    0.06
  20  -2   0    0.00    0.04
 -20   2   0    0.06    0.05
  20   2   0   -0.04    0.03
  20   2   0    0.04    0.04
  20   2   0   -0.01    0.03
  20  -2   0   -0.01    0.03
  20   2   0    0.00    0.05
  20  -2   0    0.03    0.05
 -22  -2   0    0.46    0.07
  22   2   0    0.27    0.08
  22  -2   0    0.39    0.07
  22  -2   0    0.37    0.08
  22   2   0    0.38    0.08
  22   2   0    0.55    0.08
 -22   2   0    0.49    0.08
  22  -2   0    0.53    0.09
 -24   2   0    0.02    0.05
 -24  -2   0    0.01    0.05
  24  -2   0    0.06    0.06
  24   2   0    0.01    0.05
  24  -2   0    0.02    0.04
  24   2   0    0.00    0.05
  24  -2   0   -0.02    0.05
  24   2   0    0.09    0.06
  26  -2   0    0.60    0.11
  26   2   0    0.42    0.09
 -26  -2   0    0.46    0.08
  26   2   0    0.53    0.08
 -26   2   0    0.47    0.09
  26   2   0    0.52    0.11
  26  -2   0    0.30    0.09
  28   2   0   -0.02    0.06
  28  -2   0    0.06    0.07
 -28  -2   0   -0.06    0.05
 -28   2   0    0.03    0.06
  28   2   0    0.05    0.06
  28  -2   0   -0.01    0.06
  30  -2   0    0.15    0.08
  30   2   0    0.51    0.12
  30   2   0    0.27    0.10
 -30   2   0    0.46    0.10
  30  -2   0    0.41    0.11
 -32   2   0    0.21    0.08
  32  -2   0    0.36    0.11
  32   2   0    0.15    0.09
  32  -2   0    0.30    0.11
  32   2   0    0.19    0.10
  34   2   0    0.23    0.10
  34  -2   0    0.10    0.08
 -34  -2   0    0.01    0.09
  34  -2   0   -0.10    0.07
 -36  -2   0   -0.08    0.09
  36  -2   0    0.04    0.09
  36   2   0   -0.02    0.09
  36  -2   0   -0.04    0.09
 -38  -2   0    0.02    0.12
  38   2   0   -0.02    0.09
  38  -2   0    0.02    0.09
 -40  -2   0   -0.08    0.11
  40  -2   0    0.05    0.11
  40   2   0    0.20    0.13
 -42  -2   0    0.45    0.16
 -42   2   0    0.36    0.16
   0   4   0  278.54    5.65
   0   4   0  254.28    5.90
   0  -4   0  273.27    5.68
  -2  -4   0   -0.81    0.03
  -2   4   0   -0.78    0.03
   2  -4   0   -0.74    0.03
   2  -4   0   -0.83    0.03
   2   4   0   -0.85    0.02
   2   4   0   -0.80    0.03
  -2   4   0   -0.74    0.03
   4   4   0    3.34    0.12
   4  -4   0    3.16    0.12
  -4   4   0    3.26    0.10
  -4  -4   0    2.97    0.11
   4  -4   0    2.84    0.11
   4  -4   0    3.15    0.10
   4   4   0    2.83    0.11
   6   4   0   -0.16    0.03
   6  -4   0   -0.15    0.02
  -6   4   0   -0.17    0.02
   6  -4   0   -0.14    0.03
   6  -4   0   -0.20    0.03
  -6  -4   0   -0.19    0.03
   6   4   0   -0.09    0.03
   8   4   0  675.70   14.93
   8   4   0  725.09   15.25
   8  -4   0  680.48   14.79
  -8   4   0  774.84   15.16
   8  -4   0  693.45   14.85
  -8  -4   0  701.11   14.69
   8   4   0  669.55   14.56
  10   4   0   -0.08    0.02
  10  -4   0   -0.09    0.03
  10  -4   0   -0.05    0.03
  10  -4   0   -0.08    0.02
  10   4   0   -0.07    0.02
 -10   4   0   -0.08    0.02
 -10  -4   0   -0.07    0.03
  10   4   0   -0.10    0.03
  12   4   0   76.44    1.67
  12  -4   0   75.28    1.62
  12   4   0   75.73    1.59
  12  -4   0   74.66    1.64
  12  -4   0   71.78    1.64
  14   4   0   -0.02    0.03
  14  -4   0    0.03    0.04
  14   4   0    0.00    0.04
  14   4   0   -0.02    0.03
  14  -4   0   -0.03    0.03
  14   4   0   -0.05    0.03
  14  -4   0   -0.01    0.03
  14  -4   0    0.01    0.04
  16  -4   0  145.59    3.08
  16  -4   0  143.76    3.10
  16   4   0  142.34    3.09
  16  -4   0  139.65    3.14
  16   4   0  146.10    3.04
  16   4   0  144.45    3.17
  16   4   0  148.78    3.14
  16  -4   0  144.80    3.11
  18   4   0   -0.03    0.03
  18  -4   0   -0.01    0.03
  18   4   0    0.09    0.05
  18   4   0    0.05    0.04
  18  -4   0    0.00    0.04
  18   4   0    0.05    0.04
  18  -4   0    0.00    0.04
  18  -4   0    0.03    0.05
 -18   4   0    0.01    0.04
  20   4   0   69.66    1.58
  20   4   0   67.19    1.52
  20   4   0   69.52    1.62
 -20   4   0   71.58    1.57
  20  -4   0   67.52    1.59
  20  -4   0   69.67    1.59
  20   4   0   70.68    1.60
  20  -4   0   69.02    1.57
  22  -4   0   -0.01    0.05
 -22  -4   0    0.05    0.04
  22   4   0   -0.03    0.05
  22   4   0    0.06    0.05
  22  -4   0    0.01    0.03
  22  -4   0    0.02    0.05
  22   4   0    0.05    0.06
 -22   4   0    0.05    0.05
  24  -4   0   64.92    1.52
 -24   4   0   68.65    1.53
  24  -4   0   65.93    1.56
  24   4   0   64.22    1.55
  24   4   0   67.20    1.56
 -24  -4   0   67.94    1.48
  24   4   0   66.03    1.59
  24  -4   0   65.07    1.56
 -26   4   0   -0.04    0.06
  26   4   0    0.05    0.06
  26  -4   0    0.16    0.08
  26  -4   0    0.06    0.06
 -26  -4   0    0.03    0.07
  26   4   0   -0.06    0.05
 -26  -4   0    0.03    0.05
  28  -4   0   35.36    0.96
  28  -4   0   34.66    0.95
  28   4   0   36.93    0.94
  28   4   0   36.97    0.99
 -28   4   0   36.10    0.93
 -28  -4   0   34.97    0.95
 -30   4   0    0.01    0.07
  30  -4   0    0.07    0.08
 -30  -4   0   -0.14    0.05
  30   4   0    0.04    0.08
  30  -4   0    0.11    0.07
  32   4   0   32.62    0.96
  32  -4   0   32.54    0.93
 -32   4   0   33.08    0.88
  32  -4   0   32.65    0.93
 -32  -4   0   32.40    0.93
 -34   4   0   -0.01    0.08
  34  -4   0    0.06    0.09
  34  -4   0   -0.09    0.07
  34   4   0   -0.05    0.08
 -34  -4   0    0.02    0.10
 -36  -4   0   12.84    0.53
  36   4   0   12.39    0.53
  36  -4   0   12.70    0.52
 -38  -4   0    0.13    0.11
  38  -4   0    0.10    0.10
  38   4   0   -0.03    0.09
 -40  -4   0   10.92    0.52
  40   4   0   11.03    0.52
  40  -4   0   11.80    0.52
  42  -4   0    0.10    0.11
 -42  -4   0    0.18    0.14
  42   4   0   -0.02    0.11
   0   6   0   -0.20    0.02
   0  -6   0   -0.19    0.02
   0  -6   0   -0.19    0.02
   0   6   0   -0.22    0.03
   2   6   0   -0.24    0.03
  -2   6   0   -0.22    0.02
  -2   6   0   -0.20    0.03
   2   6   0   -0.25    0.02
   2  -6   0   -0.20    0.03
  -2  -6   0   -0.23    0.02
   2  -6   0   -0.18    0.02
   2   6   0   -0.22    0.02
  -4  -6   0   -0.09    0.02
   4   6   0   -0.06    0.02
   4   6   0   -0.11    0.03
   4  -6   0   -0.09    0.02
  -4   6   0   -0.07    0.02
   4  -6   0   -0.09    0.02
  -4   6   0   -0.02    0.02
   6   6   0   -0.20    0.03
   6  -6   0   -0.27    0.03
  -6  -6   0   -0.20    0.03
   6  -6   0   -0.25    0.03
   6   6   0   -0.25    0.03
   6  -6   0   -0.26    0.02
  -6   6   0   -0.21    0.02
  -8   6   0   -0.09    0.02
  -8  -6   0   -0.12    0.02
   8  -6   0   -0.07    0.02
   8   6   0   -0.11    0.02
   8  -6   0   -0.12    0.03
   8   6   0   -0.12    0.01
   8   6   0   -0.10    0.03
   8  -6   0   -0.13    0.02
  10   6   0    1.34    0.09
  10   6   0    1.33    0.06
  10   6   0    1.47    0.10
 -10  -6   0    1.45    0.09
 -10   6   0    1.35    0.07
  10  -6   0    1.30    0.09
  10  -6   0    1.25    0.08
  10  -6   0    1.22    0.09
  12   6   0   -0.04    0.02
  12  -6   0   -0.03    0.04
 -12  -6   0   -0.08    0.03
  12   6   0   -0.05    0.03
  12  -6   0   -0.02    0.03
  12   6   0   -0.07    0.04
  12  -6   0   -0.05    0.04
  14   6   0    9.65    0.30
  14  -6   0    9.79    0.31
  14  -6   0   10.14    0.30
 -14  -6   0    9.56    0.30
  14   6   0    9.96    0.32
  14   6   0   10.31    0.25
 -14   6   0    9.87    0.28
  14  -6   0   10.03    0.30
  16  -6   0    0.02    0.03
  16   6   0   -0.09    0.03
 -16   6   0    0.00    0.03
 -16   6   0   -0.06    0.03
  16  -6   0   -0.06    0.04
  16  -6   0   -0.02    0.03
  16   6   0   -0.05    0.02
  16   6   0    0.00    0.04
 -16  -6   0   -0.03    0.04
  18   6   0    0.31    0.07
 -18  -6   0    0.25    0.06
  18  -6   0    0.27    0.07
  18   6   0    0.26    0.06
  18   6   0    0.27    0.04
 -18   6   0    0.25    0.06
 -18   6   0    0.32    0.06
  18  -6   0    0.25    0.06
 -20  -6   0    0.04    0.03
 -20  -6   0   -0.03    0.04
  20  -6   0    0.00    0.04
  20   6   0    0.02    0.04
  20   6   0    0.04    0.05
 -20   6   0    0.01    0.04
  20  -6   0    0.03    0.05
 -20   6   0    0.07    0.05
 -22   6   0    1.41    0.11
 -22  -6   0    1.39    0.10
  22   6   0    1.59    0.13
  22  -6   0    1.23    0.13
 -22   6   0    1.20    0.13
  22  -6   0    1.46    0.15
 -22  -6   0    1.30    0.13
  22   6   0    1.42    0.15
 -24   6   0    0.13    0.06
  24   6   0   -0.02    0.06
 -24  -6   0    0.06    0.06
  24  -6   0   -0.01    0.05
  24   6   0    0.00    0.05
  24  -6   0    0.02    0.06
  26   6   0    1.62    0.17
 -26  -6   0    1.54    0.16
  26  -6   0    1.46    0.15
  26   6   0    1.60    0.14
 -26   6   0    1.68    0.15
  26  -6   0    1.50    0.17
 -28   6   0    0.01    0.07
 -28  -6   0    0.09    0.07
  28  -6   0    0.10    0.08
  28   6   0    0.02    0.07
  28  -6   0    0.02    0.06
  28   6   0    0.07    0.06
 -30   6   0    0.21    0.09
  30  -6   0    0.23    0.09
  30   6   0    0.26    0.10
  30  -6   0    0.30    0.09
 -30  -6   0    0.09    0.09
 -32   6   0    0.19    0.09
  32   6   0    0.21    0.11
  32  -6   0    0.27    0.08
 -32  -6   0    0.25    0.10
  32  -6   0    0.25    0.10
 -34   6   0    0.15    0.10
 -34  -6   0    0.22    0.11
  34  -6   0    0.10    0.09
  34   6   0    0.03    0.09
  36  -6   0   -0.01    0.09
  36   6   0    0.03    0.10
 -36  -6   0    0.05    0.10
 -36   6   0    0.14    0.10
 -38  -6   0    0.76    0.17
  38   6   0    0.64    0.15
  38  -6   0    0.68    0.16
  40   6   0   -0.11    0.10
  40  -6   0    0.22    0.11
 -40  -6   0    0.11    0.13
 -42  -6   0    0.27    0.16
  42  -6   0    0.61    0.17
  42   6   0    0.37    0.15
   0   8   0  410.85    8.72
   0  -8   0  403.72    8.66
   0  -8   0  429.27    8.73
  -2   8   0   -0.29    0.04
   2   8   0   -0.32    0.03
  -2   8   0   -0.30    0.03
   2   8   0   -0.32    0.04
   2   8   0   -0.30    0.02
  -4  -8   0  705.24   14.77
  -4   8   0  756.90   15.37
   4   8   0  710.00   14.94
  -4   8   0  722.71   14.90
   4   8   0  658.55   14.65
   4  -8   0  671.08   14.83
   4   8   0  723.87   15.53
   4  -8   0  711.30   14.82
  -6   8   0   -0.07    0.03
   6   8   0   -0.10    0.03
  -6   8   0   -0.14    0.03
   6   8   0   -0.09    0.03
  -6  -8   0   -0.09    0.03
   6  -8   0   -0.05    0.04
   6  -8   0   -0.09    0.02
  -8  -8   0  325.86    6.89
  -8   8   0  338.29    7.03
   8  -8   0  323.90    6.90
   8   8   0  321.63    6.97
  -8   8   0  340.09    7.19
   8  -8   0  330.11    7.01
   8   8   0  344.05    7.42
  10  -8   0    0.01    0.04
  10  -8   0   -0.03    0.04
  10   8   0   -0.06    0.04
 -10  -8   0   -0.08    0.03
  10   8   0   -0.08    0.03
 -10   8   0   -0.04    0.03
  10  -8   0   -0.06    0.03
  10   8   0   -0.11    0.01
 -10   8   0   -0.09    0.03
  12  -8   0  135.55    3.04
 -12   8   0  145.61    3.04
  12  -8   0  147.32    3.03
  12   8   0  137.86    3.07
  12   8   0  143.44    3.13
  12   8   0  137.91    2.95
 -12   8   0  148.29    3.09
 -12  -8   0  143.30    3.03
 -14  -8   0    0.01    0.04
 -14   8   0   -0.01    0.03
  14   8   0   -0.01    0.04
  14   8   0    0.02    0.05
  14  -8   0    0.01    0.03
  14   8   0    0.01    0.02
  14  -8   0    0.02    0.05
 -14   8   0    0.00    0.04
  16  -8   0  184.47    3.94
  16   8   0  179.48    3.85
  16  -8   0  181.75    3.94
  16   8   0  189.54    4.05
  16   8   0  182.47    3.99
 -16   8   0  188.96    4.01
 -16  -8   0  182.89    3.93
 -16   8   0  189.57    3.94
 -18   8   0    0.03    0.03
 -18  -8   0   -0.03    0.04
  18  -8   0    0.00    0.03
 -18   8   0   -0.01    0.04
  18   8   0    0.00    0.02
  18   8   0    0.07    0.05
  18   8   0    0.00    0.04
  18  -8   0   -0.01    0.04
 -20  -8   0   61.63    1.36
 -20  -8   0   62.63    1.45
 -20   8   0   63.25    1.45
  20  -8   0   61.51    1.46
  20   8   0   65.46    1.48
  20   8   0   61.46    1.48
  20  -8   0   61.47    1.44
 -20   8   0   62.56    1.43
  22   8   0    0.04    0.06
 -22   8   0    0.03    0.05
 -22  -8   0   -0.02    0.05
  22  -8   0   -0.03    0.04
  22   8   0    0.10    0.06
 -22   8   0    0.03    0.04
  22  -8   0    0.03    0.05
 -24  -8   0   46.40    1.15
  24   8   0   47.13    1.19
 -24   8   0   46.14    1.14
  24   8   0   46.02    1.16
  24  -8   0   46.47    1.16
  24  -8   0   46.71    1.14
 -26  -8   0    0.01    0.07
  26  -8   0    0.03    0.06
  26   8   0    0.03    0.06
 -26   8   0   -0.04    0.06
  26   8   0    0.01    0.07
  26  -8   0   -0.03    0.06
 -28  -8   0   14.57    0.51
  28  -8   0   15.07    0.50
  28  -8   0   15.06    0.53
 -28   8   0   15.16    0.50
  28   8   0   15.87    0.55
  28   8   0   16.21    0.51
 -30   8   0    0.10    0.08
  30   8   0    0.06    0.09
 -30  -8   0    0.09    0.09
  30   8   0    0.02    0.06
  30  -8   0    0.04    0.08
  32   8   0   32.18    0.96
  32  -8   0   31.60    0.93
 -32   8   0   32.96    0.91
 -32  -8   0   32.81    0.93
  34   8   0    0.14    0.11
 -34  -8   0    0.05    0.09
  34  -8   0    0.11    0.10
 -34   8   0    0.09    0.10
  36  -8   0    7.81    0.40
 -36   8   0    7.59    0.37
  36   8   0    8.03    0.42
 -36  -8   0    7.45    0.39
 -38  -8   0   -0.01    0.11
  38   8   0   -0.02    0.10
  38  -8   0    0.01    0.09
 -38   8   0    0.00    0.09
 -40  -8   0   16.56    0.64
  40   8   0   15.60    0.65
  40  -8   0   16.37    0.64
  42  -8   0    0.10    0.11
  42   8   0    0.00    0.12
   0 -10   0   -0.18    0.03
   0  10   0   -0.14    0.03
   0  10   0   -0.17    0.02
   0 -10   0   -0.15    0.03
  -2 -10   0    0.26    0.05
   2  10   0    0.32    0.06
   2 -10   0    0.17    0.04
  -2  10   0    0.28    0.06
   2 -10   0    0.31    0.04
  -2 -10   0    0.33    0.05
   2  10   0    0.30    0.04
  -2  10   0    0.33    0.05
   4 -10   0   -0.02    0.03
   4 -10   0   -0.05    0.02
   4  10   0   -0.09    0.03
  -4  10   0   -0.07    0.02
   4  10   0   -0.07    0.01
   4  10   0   -0.04    0.03
  -4  10   0   -0.10    0.03
  -4 -10   0   -0.04    0.03
   6  10   0    1.85    0.11
  -6 -10   0    1.61    0.10
   6  10   0    1.78    0.10
   6 -10   0    1.75    0.08
  -6  10   0    1.79    0.10
   6 -10   0    1.83    0.11
  -6  10   0    1.67    0.10
  -8 -10   0   -0.07    0.03
   8 -10   0   -0.06    0.04
  -8  10   0   -0.08    0.03
   8  10   0   -0.13    0.03
   8  10   0   -0.06    0.04
  -8  10   0   -0.07    0.03
   8 -10   0   -0.06    0.02
 -10  10   0   -0.04    0.03
  10 -10   0   -0.06    0.04
  10 -10   0   -0.09    0.02
 -10  10   0   -0.05    0.04
  10  10   0   -0.03    0.04
 -10 -10   0   -0.04    0.04
  10  10   0    0.01    0.04
  12  10   0    0.02    0.04
  12  10   0    0.02    0.04
  12 -10   0   -0.02    0.04
 -12 -10   0    0.06    0.04
 -12  10   0    0.03    0.04
  12 -10   0    0.04    0.03
  14  10   0    2.64    0.15
 -14 -10   0    2.67    0.15
  14  10   0    2.81    0.16
 -14  10   0    2.54    0.14
  14 -10   0    2.76    0.15
  14 -10   0    2.39    0.12
  14  10   0    2.58    0.08
 -14  10   0    2.34    0.11
  16  10   0   -0.01    0.04
 -16 -10   0    0.07    0.05
  16 -10   0   -0.02    0.03
 -16  10   0   -0.01    0.04
 -16  10   0   -0.01    0.03
  16  10   0    0.00    0.02
  16  10   0   -0.06    0.04
  16 -10   0   -0.04    0.04
 -18 -10   0    0.16    0.06
  18  10   0    0.16    0.07
 -18  10   0    0.12    0.06
 -18  10   0    0.26    0.05
  18  10   0    0.16    0.06
  18 -10   0    0.20    0.05
  18 -10   0    0.17    0.07
  20 -10   0    0.10    0.05
 -20 -10   0    0.04    0.06
  20 -10   0    0.02    0.06
 -20  10   0    0.06    0.05
  20  10   0   -0.04    0.05
  20  10   0    0.02    0.05
 -20  10   0    0.05    0.04
 -22  10   0    0.27    0.08
  22 -10   0    0.34    0.09
  22  10   0    0.22    0.08
  22  10   0    0.30    0.08
  22 -10   0    0.25    0.07
 -22 -10   0    0.19    0.07
  24  10   0   -0.03    0.05
  24  10   0    0.00    0.06
  24 -10   0   -0.04    0.06
 -24 -10   0   -0.01    0.06
 -24  10   0   -0.02    0.06
  24 -10   0    0.05    0.05
  26 -10   0    0.75    0.11
 -26  10   0    0.63    0.12
  26  10   0    0.62    0.12
 -26 -10   0    0.76    0.12
  26  10   0    0.77    0.12
  26 -10   0    0.99    0.15
  28  10   0    0.06    0.08
 -28  10   0    0.11    0.08
  28 -10   0   -0.07    0.06
 -28 -10   0   -0.07    0.07
  28  10   0    0.01    0.06
 -30 -10   0    0.56    0.12
  30  10   0    0.42    0.12
  30  10   0    0.42    0.10
  30 -10   0    0.47    0.12
 -30  10   0    0.59    0.12
  32  10   0    0.17    0.10
 -32  10   0    0.40    0.12
 -32 -10   0    0.28    0.11
  32 -10   0    0.33    0.12
  34 -10   0   -0.02    0.09
 -34 -10   0    0.06    0.10
 -34  10   0    0.03    0.09
  34  10   0    0.05    0.09
  36  10   0    0.00    0.10
 -36  10   0   -0.13    0.08
  36 -10   0    0.07    0.09
 -36 -10   0    0.01    0.10
 -38 -10   0   -0.10    0.11
 -38  10   0    0.18    0.13
  38 -10   0    0.27    0.12
  38  10   0    0.16    0.12
  40 -10   0    0.01    0.09
  40  10   0    0.13    0.12
 -40  10   0    0.05    0.11
   0 -12   0  150.01    3.23
   0 -12   0  158.68    3.24
   0  12   0  149.96    3.21
   0  12   0  152.56    3.36
  -2 -12   0   -0.12    0.03
   2  12   0   -0.11    0.02
  -2 -12   0   -0.07    0.03
   2 -12   0   -0.04    0.04
   2 -12   0   -0.05    0.03
  -2  12   0   -0.11    0.04
   2  12   0   -0.10    0.04
  -2  12   0   -0.10    0.03
   4 -12   0  186.21    3.89
  -4 -12   0  185.01    3.89
  -4  12   0  193.20    4.05
   4 -12   0  184.24    3.90
  -4  12   0  186.41    3.89
   4  12   0  179.73    4.05
   4  12   0  185.19    3.92
   4  12   0  179.91    3.85
   6 -12   0   -0.04    0.03
  -6  12   0   -0.06    0.04
   6  12   0   -0.11    0.04
  -6 -12   0   -0.09    0.04
   6 -12   0   -0.08    0.04
   6  12   0   -0.05    0.02
   6  12   0   -0.10    0.04
  -6  12   0   -0.08    0.04
  -8  12   0   49.05    1.11
  -8  12   0   47.14    1.12
   8 -12   0   50.57    1.13
   8 -12   0   48.85    1.07
  10  12   0    0.07    0.05
 -10 -12   0    0.08    0.05
 -10  12   0    0.07    0.04
  10 -12   0    0.07    0.03
  10 -12   0    0.10    0.05
  10  12   0    0.05    0.05
 -10  12   0    0.09    0.04
  12 -12   0  205.00    4.27
  12 -12   0  200.43    4.30
  12  12   0  206.37    4.45
 -12  12   0  201.86    4.29
 -12 -12   0  196.40    4.28
  12  12   0  199.67    4.34
 -12  12   0  207.02    4.39
  14 -12   0    0.01    0.03
  14 -12   0    0.09    0.05
 -14 -12   0    0.06    0.05
  14  12   0    0.02    0.04
 -14  12   0    0.04    0.04
  14  12   0    0.09    0.05
 -14  12   0    0.03    0.05
  16  12   0   78.76    1.82
  16 -12   0   75.89    1.79
  16  12   0   82.73    1.84
 -16  12   0   80.54    1.77
 -16 -12   0   78.11    1.77
  16 -12   0   78.21    1.75
 -18  12   0    0.10    0.05
  18  12   0    0.09    0.07
 -18  12   0    0.00    0.04
  18  12   0    0.06    0.05
  18 -12   0    0.10    0.04
  18 -12   0    0.16    0.06
 -18 -12   0    0.12    0.06
  20  12   0   65.14    1.57
  20 -12   0   64.29    1.49
 -20  12   0   64.63    1.49
  20 -12   0   65.70    1.55
 -20 -12   0   65.40    1.52
  20  12   0   66.69    1.57
 -20  12   0   65.75    1.53
  22 -12   0    0.05    0.06
  22 -12   0    0.14    0.05
 -22  12   0    0.11    0.07
  22  12   0    0.02    0.07
 -22 -12   0   -0.06    0.06
  22  12   0    0.21    0.07
  24  12   0   69.20    1.67
  24  12   0   68.77    1.66
 -24 -12   0   68.23    1.62
  24 -12   0   67.59    1.64
 -24  12   0   68.86    1.63
 -26  12   0    0.06    0.07
  26  12   0    0.01    0.06
  26  12   0    0.03    0.08
 -26 -12   0    0.00    0.07
  26 -12   0    0.04    0.07
  28  12   0   23.12    0.74
 -28  12   0   23.22    0.70
  28  12   0   23.26    0.71
  28 -12   0   23.07    0.72
 -28 -12   0   23.24    0.70
  30  12   0    0.02    0.07
 -30 -12   0    0.07    0.09
  30 -12   0    0.05    0.08
  30  12   0   -0.01    0.08
 -30  12   0    0.12    0.09
  32 -12   0   27.99    0.86
  32  12   0   28.99    0.89
  32  12   0   28.51    0.86
 -32  12   0   28.10    0.84
 -32 -12   0   27.73    0.84
 -34 -12   0    0.00    0.09
  34 -12   0    0.03    0.09
 -34  12   0    0.03    0.09
  34  12   0   -0.10    0.08
  36 -12   0    6.62    0.37
 -36  12   0    6.30    0.36
 -36 -12   0    6.22    0.36
  36  12   0    6.20    0.38
 -38 -12   0   -0.13    0.12
 -38  12   0    0.02    0.11
  38  12   0    0.02    0.10
  38 -12   0   -0.11    0.09
  40 -12   0    8.00    0.44
  40  12   0    7.48    0.44
 -40  12   0    7.93    0.42
   0  14   0    0.00    0.04
   0 -14   0   -0.04    0.04
   0 -14   0   -0.01    0.03
   0  14   0   -0.05    0.03
  -2 -14   0    2.85    0.14
  -2  14   0    2.82    0.13
   2  14   0    2.72    0.12
   2  14   0    2.72    0.15
   2 -14   0    2.88    0.12
   2 -14   0    3.04    0.15
  -2  14   0    2.54    0.15
  -2 -14   0    2.86    0.13
   4 -14   0   -0.02    0.04
  -4 -14   0    0.02    0.04
   4  14   0   -0.01    0.04
   4  14   0   -0.02    0.02
  -4 -14   0    0.01    0.04
  -4  14   0    0.04    0.05
   4 -14   0   -0.04    0.03
  -4  14   0    0.03    0.03
  -6 -14   0    8.88    0.28
   6  14   0    8.47    0.30
   6  14   0    8.66    0.21
   6 -14   0    8.58    0.28
  -6  14   0    8.14    0.29
   6 -14   0    8.22    0.23
  -6  14   0    8.47    0.27
   6  14   0    8.47    0.27
  -8  14   0   -0.02    0.04
   8 -14   0   -0.11    0.03
  -8 -14   0    0.02    0.04
   8  14   0   -0.01    0.04
   8  14   0    0.03    0.05
   8  14   0   -0.05    0.01
   8 -14   0    0.02    0.03
  -8  14   0   -0.01    0.04
  10  14   0    5.37    0.22
  10  14   0    5.28    0.23
  10 -14   0    5.39    0.17
 -10  14   0    5.78    0.22
 -10  14   0    5.30    0.20
 -10 -14   0    5.62    0.22
  10 -14   0    5.61    0.23
 -12 -14   0   -0.01    0.04
  12  14   0    0.06    0.05
 -12  14   0    0.01    0.04
  12 -14   0    0.03    0.03
  12 -14   0   -0.02    0.04
  14 -14   0    0.52    0.07
 -14 -14   0    0.44    0.08
  14  14   0    0.41    0.08
  14 -14   0    0.42    0.08
 -14  14   0    0.61    0.07
  14  14   0    0.47    0.09
 -14  14   0    0.46    0.09
  16  14   0   -0.04    0.05
  16  14   0    0.09    0.06
 -16 -14   0    0.00    0.05
  16 -14   0    0.06    0.05
 -16  14   0    0.02    0.05
 -16  14   0   -0.05    0.03
  16 -14   0   -0.02    0.03
 -18  14   0    4.59    0.19
  18  14   0    4.96    0.24
 -18 -14   0    4.57    0.23
 -18  14   0    5.04    0.24
  18  14   0    4.65    0.25
  18 -14   0    4.29    0.23
  18 -14   0    4.37    0.19
 -20  14   0    0.06    0.06
  20 -14   0   -0.03    0.06
  20  14   0    0.11    0.07
  20  14   0    0.01    0.06
 -20 -14   0   -0.03    0.06
  22 -14   0    0.48    0.11
 -22 -14   0    0.51    0.10
  22  14   0    0.22    0.09
 -22  14   0    0.30    0.09
  22  14   0    0.32    0.09
 -24  14   0    0.01    0.07
  24  14   0    0.05    0.08
  24  14   0    0.06    0.07
  24 -14   0    0.03    0.06
 -24 -14   0   -0.02    0.06
  26 -14   0    0.55    0.12
 -26 -14   0    0.50    0.11
  26  14   0    0.75    0.14
  26  14   0    0.53    0.11
 -26  14   0    0.37    0.10
 -28 -14   0    0.03    0.09
  28  14   0    0.01    0.07
  28  14   0   -0.13    0.06
  28 -14   0    0.06    0.07
 -28  14   0    0.07    0.07
 -30 -14   0    0.14    0.10
 -30  14   0    0.13    0.10
  30  14   0    0.28    0.10
  30 -14   0    0.04    0.08
  30  14   0    0.30    0.11
 -32  14   0    0.27    0.11
  32  14   0    0.25    0.12
  32  14   0    0.48    0.12
 -32 -14   0    0.35    0.12
  32 -14   0    0.35    0.12
 -34 -14   0    0.36    0.13
  34  14   0    0.45    0.14
  34 -14   0    0.41    0.12
 -34  14   0    0.28    0.12
  36 -14   0    0.05    0.10
 -36  14   0   -0.16    0.09
  36  14   0   -0.14    0.09
 -36 -14   0   -0.08    0.11
  38 -14   0    0.85    0.19
 -38  14   0    0.47    0.16
  38  14   0    0.73    0.17
  40  14   0    0.12    0.14
  40 -14   0    0.01    0.10
 -40  14   0    0.06    0.13
   0  16   0  123.70    2.75
   0  16   0  114.59    2.60
   0 -16   0  129.26    2.64
   0 -16   0  121.40    2.63
  -2  16   0   -0.02    0.03
  -2 -16   0   -0.05    0.04
   2  16   0    0.00    0.03
   2  16   0   -0.04    0.04
  -2  16   0   -0.02    0.05
   2 -16   0   -0.01    0.04
  -2 -16   0   -0.02    0.04
   2 -16   0   -0.07    0.03
   4 -16   0  285.01    6.02
   4  16   0  289.79    6.00
   4  16   0  277.54    6.25
  -4 -16   0  287.29    6.01
   4 -16   0  287.83    6.03
  -4 -16   0  284.55    6.07
  -4  16   0  288.56    6.01
  -4  16   0  295.41    6.25
  -6 -16   0   -0.07    0.04
   6 -16   0   -0.04    0.03
   6  16   0   -0.07    0.02
  -6 -16   0   -0.05    0.04
  -6  16   0   -0.03    0.05
   6 -16   0   -0.10    0.04
  -6  16   0   -0.08    0.03
   6  16   0   -0.08    0.04
  -8  16   0  212.19    4.50
   8  16   0  202.46    4.52
   8  16   0  203.38    4.38
  -8 -16   0  203.08    4.33
   8 -16   0  206.17    4.31
   8 -16   0  207.47    4.36
   8  16   0  198.34    4.24
  -8  16   0  205.01    4.34
  10  16   0    0.02    0.05
 -10  16   0    0.01    0.05
  10 -16   0   -0.04    0.02
 -10 -16   0    0.04    0.05
 -10  16   0   -0.05    0.03
  10  16   0    0.00    0.05
  10 -16   0    0.02    0.05
  12  16   0  108.70    2.52
  12  16   0  109.40    2.45
 -12  16   0  115.54    2.47
 -12  16   0  110.21    2.42
  12 -16   0  106.40    2.43
  12 -16   0  109.88    2.36
 -12 -16   0  110.81    2.41
 -14 -16   0    0.08    0.06
 -14  16   0   -0.02    0.04
  14 -16   0    0.00    0.03
  14  16   0    0.05    0.05
  14 -16   0    0.01    0.05
  14  16   0    0.00    0.05
 -14  16   0    0.02    0.05
 -16  16   0   49.84    1.15
 -16  16   0   49.02    1.18
  16  16   0   47.75    1.22
  16  16   0   48.14    1.20
  16 -16   0   48.25    1.19
 -16 -16   0   47.19    1.16
  16 -16   0   48.54    1.13
  18  16   0    0.03    0.06
  18 -16   0    0.04    0.06
  18  16   0    0.05    0.06
 -18  16   0   -0.03    0.04
 -18  16   0    0.04    0.06
 -18 -16   0    0.00    0.06
  20  16   0   70.48    1.71
 -20  16   0   70.51    1.67
  20 -16   0   70.31    1.69
  20  16   0   72.93    1.73
 -20 -16   0   71.63    1.66
  22  16   0   -0.04    0.06
 -22 -16   0   -0.03    0.06
 -22  16   0    0.02    0.06
  22  16   0   -0.02    0.07
  22 -16   0   -0.09    0.06
  24  16   0   15.30    0.55
 -24 -16   0   16.39    0.53
  24  16   0   16.28    0.55
 -24  16   0   16.43    0.54
  24 -16   0   15.05    0.54
 -26 -16   0   -0.06    0.07
 -26  16   0    0.00    0.07
  26 -16   0    0.05    0.07
  26  16   0   -0.08    0.06
  26  16   0   -0.04    0.08
  28  16   0   26.88    0.85
  28  16   0   28.87    0.84
 -28  16   0   27.84    0.82
  28 -16   0   27.77    0.84
 -28 -16   0   26.20    0.79
  30  16   0    0.09    0.10
 -30 -16   0    0.12    0.10
  30  16   0   -0.05    0.08
  30 -16   0   -0.03    0.07
 -30  16   0   -0.06    0.08
  32  16   0    9.61    0.44
 -32  16   0   10.24    0.45
  32  16   0    9.74    0.47
  32 -16   0   10.74    0.47
 -32 -16   0   10.28    0.44
 -34  16   0    0.08    0.11
 -34 -16   0   -0.03    0.10
  34 -16   0    0.01    0.10
  34  16   0    0.06    0.11
  36 -16   0    7.28    0.42
 -36  16   0    7.66    0.41
  36  16   0    7.73    0.44
 -38  16   0   -0.04    0.11
  38 -16   0    0.13    0.11
  38  16   0    0.16    0.13
   0 -18   0    0.04    0.04
   0 -18   0   -0.04    0.04
   0  18   0    0.03    0.05
   0  18   0   -0.03    0.03
   2 -18   0    0.26    0.05
  -2  18   0    0.33    0.08
  -2 -18   0    0.33    0.07
   2  18   0    0.34    0.08
   2 -18   0    0.40    0.08
  -2 -18   0    0.24    0.06
  -2  18   0    0.32    0.06
   2  18   0    0.31    0.06
   4 -18   0   -0.04    0.04
   4  18   0   -0.03    0.03
   4  18   0   -0.05    0.04
   4 -18   0   -0.04    0.03
  -4  18   0   -0.02    0.04
  -4  18   0    0.01    0.04
  -4 -18   0   -0.02    0.04
  -4 -18   0   -0.07    0.04
  -6 -18   0    0.25    0.07
  -6  18   0    0.25    0.06
   6 -18   0    0.35    0.05
   6  18   0    0.22    0.04
   6  18   0    0.34    0.09
   6 -18   0    0.20    0.06
  -6  18   0    0.22    0.07
  -6 -18   0    0.21    0.06
   8 -18   0    0.01    0.05
  -8  18   0   -0.04    0.04
  -8 -18   0    0.04    0.05
   8  18   0    0.00    0.02
   8  18   0    0.05    0.06
  -8 -18   0    0.01    0.04
  -8  18   0   -0.02    0.05
   8 -18   0   -0.03    0.02
  10  18   0    0.55    0.09
 -10 -18   0    0.42    0.08
  10 -18   0    0.44    0.06
 -10  18   0    0.49    0.09
  10  18   0    0.38    0.09
  10 -18   0    0.52    0.09
 -10  18   0    0.55    0.09
 -12  18   0    0.05    0.05
 -12  18   0    0.00    0.04
 -12 -18   0    0.03    0.05
  12 -18   0    0.03    0.03
  12  18   0    0.00    0.05
  12 -18   0   -0.02    0.05
  12  18   0    0.08    0.06
 -14  18   0    5.53    0.23
  14  18   0    5.15    0.25
  14  18   0    5.03    0.26
 -14 -18   0    5.22    0.24
 -14  18   0    5.23    0.24
  14 -18   0    5.36    0.26
 -16  18   0    0.00    0.05
  16  18   0    0.00    0.06
  16 -18   0    0.00    0.06
 -16 -18   0    0.07    0.07
 -16  18   0    0.09    0.06
  16  18   0   -0.04    0.05
 -18  18   0    0.14    0.07
  18  18   0    0.18    0.09
  18  18   0    0.20    0.08
 -18 -18   0    0.23    0.08
  18 -18   0    0.18    0.08
  20  18   0    0.03    0.07
  20  18   0    0.00    0.07
 -20  18   0    0.03    0.06
  20 -18   0    0.04    0.07
 -20 -18   0    0.11    0.07
 -22  18   0    0.15    0.09
 -22 -18   0    0.06    0.08
  22  18   0    0.23    0.10
  22  18   0    0.25    0.10
  22 -18   0    0.07    0.07
  24  18   0    0.03    0.08
  24 -18   0    0.00    0.07
 -24  18   0    0.02    0.08
 -24 -18   0   -0.02    0.07
  24  18   0    0.10    0.07
  26 -18   0    1.95    0.21
 -26 -18   0    1.72    0.19
  26  18   0    1.52    0.19
  26  18   0    1.38    0.19
 -26  18   0    1.52    0.19
  28 -18   0    0.06    0.09
 -28  18   0   -0.06    0.07
  28  18   0   -0.04    0.08
 -28 -18   0   -0.04    0.08
  28  18   0   -0.01    0.09
 -30  18   0    0.82    0.16
  30 -18   0    1.05    0.17
  30  18   0    0.74    0.15
  30  18   0    0.68    0.16
 -30 -18   0    0.97    0.16
  32  18   0    0.07    0.12
  32 -18   0    0.19    0.11
  32  18   0    0.16    0.11
 -32  18   0    0.17    0.11
 -32 -18   0    0.15    0.12
  34  18   0    0.03    0.10
 -34  18   0   -0.15    0.10
  34 -18   0    0.24    0.12
  34  18   0    0.34    0.14
  36  18   0   -0.02    0.10
  36 -18   0    0.25    0.12
 -36  18   0   -0.02    0.11
  38  18   0    0.56    0.19
  38 -18   0    0.67    0.18
 -38  18   0    0.16    0.13
   0  20   0  117.10    2.67
   0  20   0  117.07    2.52
   0 -20   0  118.32    2.57
   0 -20   0  115.82    2.55
   2  20   0    0.02    0.04
   2 -20   0    0.11    0.04
  -2  20   0    0.07    0.04
   2  20   0    0.03    0.05
  -2 -20   0    0.11    0.06
  -2 -20   0    0.04    0.05
  -2  20   0    0.10    0.06
   2 -20   0    0.12    0.06
  -4 -20   0   77.03    1.74
   4 -20   0   76.31    1.75
  -4  20   0   74.56    1.72
   4  20   0   76.48    1.83
   4  20   0   78.07    1.68
   4 -20   0   77.32    1.70
  -4  20   0   79.79    1.82
  -4 -20   0   77.64    1.75
  -6 -20   0    0.12    0.06
  -6  20   0    0.11    0.06
   6  20   0    0.16    0.07
   6  20   0    0.15    0.04
   6 -20   0    0.12    0.06
   6 -20   0    0.17    0.04
  -6  20   0    0.15    0.05
  -6 -20   0    0.15    0.06
  -8  20   0   47.50    1.15
   8  20   0   44.84    1.17
  -8  20   0   44.18    1.09
   8 -20   0   44.94    1.03
  -8 -20   0   45.81    1.10
   8 -20   0   45.59    1.12
  -8 -20   0   46.47    1.12
 -10  20   0    0.10    0.06
 -10  20   0    0.09    0.06
 -10 -20   0    0.01    0.05
  10 -20   0    0.11    0.06
  10  20   0    0.05    0.06
 -10 -20   0    0.15    0.06
  12 -20   0   91.32    2.09
 -12 -20   0   92.31    2.07
  12  20   0   92.88    2.10
 -12  20   0   93.21    2.08
 -12  20   0   95.59    2.14
  12  20   0   85.36    2.16
 -14  20   0    0.01    0.06
  14  20   0    0.06    0.07
 -14 -20   0    0.14    0.07
  14 -20   0   -0.01    0.06
  14  20   0    0.12    0.07
 -14  20   0    0.13    0.07
  16  20   0   59.71    1.42
 -16  20   0   57.64    1.40
 -16 -20   0   58.10    1.39
 -16  20   0   58.04    1.40
  16  20   0   55.85    1.46
  16 -20   0   57.95    1.42
  18 -20   0    0.19    0.08
  18  20   0    0.20    0.09
 -18 -20   0    0.01    0.08
  18  20   0    0.16    0.08
 -18  20   0    0.07    0.07
  20  20   0   44.42    1.17
  20  20   0   44.28    1.19
 -20 -20   0   45.60    1.13
 -20  20   0   44.27    1.15
  20 -20   0   43.68    1.16
  22  20   0    0.04    0.09
  22  20   0    0.03    0.08
  22 -20   0    0.06    0.08
 -22  20   0    0.01    0.08
 -22 -20   0    0.06    0.08
  24  20   0   23.36    0.76
 -24  20   0   25.00    0.75
  24  20   0   24.41    0.77
  24 -20   0   23.48    0.75
 -24 -20   0   23.64    0.71
  26  20   0    0.03    0.10
 -26 -20   0    0.11    0.09
  26 -20   0    0.04    0.09
 -26  20   0   -0.03    0.08
  26  20   0   -0.03    0.08
  28  20   0   30.95    0.95
  28  20   0   31.08    0.94
 -28  20   0   30.03    0.91
 -28 -20   0   30.59    0.89
  28 -20   0   31.91    0.94
 -30 -20   0    0.13    0.10
  30  20   0    0.19    0.12
 -30  20   0    0.13    0.11
  30 -20   0    0.14    0.10
  30  20   0    0.16    0.11
 -32  20   0    8.15    0.42
  32  20   0    8.22    0.43
  32  20   0    9.56    0.48
  32 -20   0    8.80    0.44
  34 -20   0   -0.05    0.09
  34  20   0    0.11    0.12
  34  20   0    0.06    0.11
 -34  20   0   -0.02    0.11
  36 -20   0   12.42    0.56
 -36  20   0   11.98    0.55
  36  20   0   11.03    0.56
   0 -22   0    0.08    0.06
   0  22   0    0.12    0.05
   0  22   0    0.08    0.06
   0 -22   0    0.05    0.05
  -2  22   0    0.23    0.08
   2  22   0    0.24    0.08
   2 -22   0    0.17    0.06
  -2  22   0    0.12    0.06
  -2 -22   0    0.29    0.07
   2 -22   0    0.12    0.07
   2  22   0    0.09    0.05
  -2 -22   0    0.15    0.07
  -4  22   0    0.06    0.06
   4  22   0   -0.01    0.06
   4 -22   0   -0.01    0.04
   4 -22   0    0.09    0.06
  -4 -22   0    0.08    0.06
   4  22   0   -0.01    0.03
  -4 -22   0   -0.02    0.04
  -4  22   0   -0.02    0.04
   6 -22   0    2.06    0.12
  -6  22   0    1.90    0.15
  -6 -22   0    2.15    0.16
   6  22   0    2.06    0.17
  -6  22   0    1.86    0.16
  -6 -22   0    2.02    0.16
   6 -22   0    2.00    0.16
  -8 -22   0    0.06    0.06
   8 -22   0   -0.05    0.05
  -8  22   0    0.00    0.05
  -8 -22   0   -0.03    0.06
   8  22   0    0.12    0.07
  -8  22   0    0.05    0.05
 -10 -22   0    0.12    0.07
 -10  22   0    0.13    0.07
 -10  22   0    0.10    0.06
 -10 -22   0    0.03    0.05
  10 -22   0    0.18    0.07
  10  22   0    0.05    0.07
  12 -22   0    0.04    0.06
 -12  22   0   -0.01    0.05
 -12 -22   0    0.04    0.07
  12  22   0    0.03    0.06
 -12 -22   0    0.15    0.07
 -12  22   0    0.09    0.06
  14 -22   0    0.30    0.09
 -14 -22   0    0.36    0.09
 -14  22   0    0.35    0.09
  14  22   0    0.35    0.10
 -14  22   0    0.45    0.10
 -14 -22   0    0.35    0.10
  16 -22   0    0.05    0.07
 -16  22   0    0.04    0.06
 -16 -22   0    0.14    0.08
  16  22   0   -0.05    0.06
  16  22   0    0.05    0.08
  18 -22   0    0.04    0.07
 -18  22   0    0.16    0.09
 -18 -22   0    0.06    0.08
  18  22   0    0.02    0.08
  18  22   0    0.06    0.08
 -20  22   0    0.03    0.07
 -20 -22   0   -0.04    0.07
  20 -22   0    0.09    0.08
  20  22   0    0.08    0.09
  20  22   0   -0.04    0.07
  22 -22   0   -0.05    0.07
 -22 -22   0    0.04    0.08
  22  22   0    0.04    0.08
  22  22   0    0.16    0.09
 -22  22   0   -0.01    0.07
  24  22   0    0.01    0.09
 -24  22   0   -0.02    0.09
  24  22   0   -0.13    0.08
  24 -22   0    0.08    0.08
 -24 -22   0    0.05    0.09
  26 -22   0    0.39    0.13
 -26  22   0    0.29    0.12
  26  22   0    0.37    0.13
  26  22   0    0.48    0.14
 -26 -22   0    0.35    0.12
  28  22   0    0.06    0.10
  28  22   0    0.05    0.11
  28 -22   0    0.00    0.09
 -28  22   0    0.03    0.10
 -28 -22   0   -0.10    0.09
 -30  22   0    0.52    0.15
  30  22   0    0.68    0.17
  30 -22   0    0.61    0.15
  30  22   0    0.18    0.12
 -32  22   0   -0.06    0.11
  32  22   0    0.13    0.13
  32 -22   0   -0.04    0.09
  32  22   0    0.16    0.11
  34  22   0    2.51    0.29
  34 -22   0    3.09    0.32
  34  22   0    2.84    0.31
 -34  22   0    2.86    0.30
   0  24   0   79.17    1.91
   0 -24   0   79.45    1.84
   0 -24   0   79.49    1.81
   0  24   0   81.71    1.79
  -2 -24   0   -0.08    0.05
  -2 -24   0    0.01    0.05
   2  24   0    0.03    0.04
   2  24   0    0.06    0.07
  -2  24   0   -0.03    0.06
   2 -24   0    0.05    0.06
   2 -24   0   -0.02    0.04
  -2  24   0    0.01    0.05
  -4  24   0   92.20    2.13
  -4 -24   0   90.14    2.05
   4 -24   0   89.85    2.06
   4 -24   0   90.05    1.99
  -4 -24   0   90.34    2.05
   4  24   0   87.47    2.14
  -4  24   0   90.95    2.02
   6  24   0    0.06    0.07
  -6  24   0    0.05    0.05
   6 -24   0    0.04    0.06
  -6  24   0    0.09    0.07
  -6 -24   0   -0.03    0.05
  -6 -24   0    0.09    0.06
  -8 -24   0   84.05    1.91
   8  24   0   81.44    2.01
  -8  24   0   82.45    1.90
  -8 -24   0   83.68    1.93
   8 -24   0   80.74    1.92
  -8  24   0   86.96    1.98
 -10  24   0    0.06    0.07
  10  24   0   -0.06    0.06
 -10  24   0    0.07    0.06
 -10 -24   0   -0.04    0.06
 -10 -24   0    0.05    0.07
  10 -24   0    0.19    0.08
  12  24   0   87.83    2.24
 -12  24   0   96.44    2.15
 -12 -24   0   95.92    2.15
  12 -24   0   93.89    2.17
 -12 -24   0   93.03    2.19
 -12  24   0   95.93    2.20
  14 -24   0    0.01    0.07
 -14 -24   0   -0.04    0.07
 -14 -24   0   -0.07    0.06
 -14  24   0    0.08    0.07
 -14  24   0    0.07    0.07
  14  24   0    0.01    0.07
 -16 -24   0   20.44    0.62
  16  24   0   17.59    0.64
  16 -24   0   20.51    0.64
 -16  24   0   19.50    0.62
 -16 -24   0   20.05    0.66
 -18  24   0    0.03    0.08
 -18 -24   0   -0.08    0.07
 -18 -24   0    0.07    0.08
  18 -24   0   -0.07    0.06
  18  24   0   -0.01    0.08
  20  24   0   33.42    0.96
  20 -24   0   34.19    0.96
 -20  24   0   33.06    0.94
 -20 -24   0   34.50    0.93
  20  24   0   31.91    0.98
  22 -24   0    0.17    0.09
  22  24   0    0.04    0.09
 -22 -24   0    0.01    0.08
  22  24   0    0.07    0.10
 -22  24   0   -0.04    0.08
  24  24   0   23.29    0.81
 -24 -24   0   25.96    0.78
 -24  24   0   25.35    0.80
  24  24   0   26.64    0.83
  24 -24   0   26.01    0.82
 -26 -24   0   -0.05    0.09
  26  24   0   -0.07    0.08
  26  24   0    0.04    0.10
 -26  24   0   -0.05    0.08
  26 -24   0   -0.09    0.08
 -28  24   0    7.75    0.42
  28  24   0    8.79    0.44
  28 -24   0    8.19    0.42
  28  24   0    7.88    0.43
 -30  24   0   -0.01    0.12
  30  24   0    0.08    0.10
  30  24   0    0.11    0.12
  30 -24   0   -0.04    0.10
  32 -24   0    7.29    0.41
  32  24   0    7.14    0.43
 -32  24   0    7.34    0.42
 -34  24   0   -0.22    0.11
  34  24   0   -0.05    0.12
  34 -24   0    0.17    0.12
  34  24   0    0.07    0.12
   0 -26   0    0.04    0.07
   0  26   0    0.05    0.05
   0 -26   0    0.03    0.05
   0  26   0    0.14    0.08
   2  26   0    1.25    0.16
  -2 -26   0    1.36    0.16
  -2  26   0    1.07    0.15
   2 -26   0    1.12    0.14
  -2 -26   0    1.10    0.12
  -2  26   0    1.28    0.13
   4  26   0    0.11    0.08
  -4 -26   0    0.03    0.06
  -4 -26   0   -0.01    0.06
  -4  26   0    0.02    0.07
  -4  26   0    0.01    0.05
   4 -26   0   -0.04    0.07
   6  26   0    1.03    0.16
  -6 -26   0    0.58    0.11
  -6 -26   0    0.95    0.13
  -6  26   0    0.61    0.11
   6 -26   0    0.79    0.13
  -6  26   0    0.61    0.12
  -8  26   0   -0.08    0.06
  -8 -26   0    0.02    0.07
  -8 -26   0    0.02    0.07
  -8  26   0    0.03    0.06
   8  26   0   -0.04    0.06
   8 -26   0    0.07    0.07
  10 -26   0    1.08    0.15
 -10 -26   0    1.03    0.14
 -10  26   0    1.11    0.14
 -10 -26   0    1.05    0.14
 -10  26   0    1.06    0.15
  10  26   0    1.02    0.16
  12  26   0    0.06    0.08
 -12  26   0    0.12    0.08
 -12  26   0    0.11    0.08
 -12 -26   0    0.03    0.07
 -12 -26   0    0.00    0.07
  12 -26   0    0.07    0.07
  14 -26   0    0.04    0.08
 -14 -26   0    0.09    0.08
  14  26   0    0.12    0.09
 -14  26   0    0.15    0.08
 -14 -26   0    0.09    0.09
 -14  26   0    0.19    0.09
  16  26   0   -0.02    0.07
 -16 -26   0   -0.02    0.08
 -16 -26   0   -0.06    0.07
 -16  26   0   -0.04    0.07
  16 -26   0    0.01    0.08
 -18 -26   0    1.92    0.20
  18 -26   0    1.66    0.20
 -18 -26   0    1.46    0.20
 -18  26   0    1.96    0.21
  18  26   0    1.70    0.21
  20  26   0   -0.06    0.08
 -20 -26   0    0.02    0.09
 -20 -26   0    0.07    0.08
  20 -26   0    0.12    0.09
 -20  26   0    0.11    0.09
 -22  26   0    0.48    0.13
 -22 -26   0    0.29    0.12
 -22 -26   0    0.47    0.13
  22  26   0    0.34    0.13
  22 -26   0    0.49    0.13
 -24  26   0    0.03    0.09
 -24 -26   0    0.03    0.10
  24 -26   0   -0.17    0.07
  24  26   0   -0.02    0.09
 -24 -26   0    0.05    0.10
  26  26   0    0.40    0.14
  26 -26   0    0.18    0.10
 -26  26   0   -0.01    0.11
 -26 -26   0    0.07    0.11
  28 -26   0   -0.02    0.09
 -28 -26   0   -0.03    0.10
 -28  26   0    0.00    0.10
  28  26   0    0.01    0.11
 -30 -26   0    0.05    0.12
 -30  26   0   -0.12    0.10
  30  26   0    0.20    0.13
  30 -26   0    0.22    0.12
 -32 -26   0    0.39    0.14
  32 -26   0    0.06    0.11
 -32  26   0    0.18    0.14
  32  26   0    0.03    0.11
  34  26   0    0.28    0.14
   0 -28   0   22.56    0.68
   0  28   0   23.51    0.72
  -2 -28   0   -0.01    0.06
  -2 -28   0    0.01    0.07
  -2  28   0   -0.04    0.05
   2  28   0   -0.10    0.06
  -2  28   0   -0.01    0.07
   2 -28   0   -0.06    0.06
  -4 -28   0   55.92    1.35
   4  28   0   55.81    1.44
  -4  28   0   55.20    1.41
   4 -28   0   53.84    1.37
  -4 -28   0   53.91    1.36
  -4  28   0   56.03    1.33
   6  28   0   -0.07    0.07
  -6 -28   0    0.08    0.08
  -6  28   0    0.05    0.08
  -6  28   0    0.02    0.06
   6 -28   0    0.01    0.07
  -6 -28   0    0.06    0.07
  -8  28   0   20.26    0.63
  -8 -28   0   19.61    0.62
   8  28   0   19.87    0.67
   8 -28   0   19.34    0.63
  -8  28   0   20.02    0.61
  -8 -28   0   18.88    0.61
 -10 -28   0    0.04    0.08
  10  28   0    0.07    0.09
  10 -28   0    0.06    0.08
 -10  28   0    0.01    0.07
 -10 -28   0   -0.02    0.07
 -10  28   0   -0.05    0.06
 -12 -28   0   23.59    0.71
  12 -28   0   24.74    0.75
 -12  28   0   23.78    0.72
 -12 -28   0   24.18    0.74
  12  28   0   23.93    0.78
 -12  28   0   23.26    0.72
 -14 -28   0    0.16    0.09
  14  28   0    0.05    0.09
 -14 -28   0    0.02    0.08
 -14  28   0   -0.01    0.07
  14 -28   0    0.07    0.08
 -16  28   0   34.51    0.98
  16  28   0   34.83    1.04
  16 -28   0   36.12    1.01
 -16 -28   0   34.24    0.97
 -16 -28   0   35.37    1.02
  18  28   0    0.03    0.09
 -18 -28   0   -0.11    0.08
  18 -28   0    0.07    0.09
 -18  28   0   -0.05    0.07
 -18 -28   0    0.02    0.09
 -20  28   0   34.26    0.98
 -20 -28   0   34.70    0.96
  20  28   0   31.69    1.01
 -20 -28   0   32.19    1.01
  20 -28   0   33.49    0.99
 -22  28   0   -0.04    0.08
  22 -28   0   -0.07    0.09
 -22 -28   0   -0.09    0.09
  22  28   0   -0.12    0.08
 -22 -28   0    0.13    0.10
  24  28   0    6.31    0.38
 -24 -28   0    6.08    0.39
  24 -28   0    6.33    0.38
 -24  28   0    6.71    0.37
 -26  28   0    0.06    0.11
 -26 -28   0    0.05    0.11
  26 -28   0   -0.18    0.08
  26  28   0    0.18    0.12
  28  28   0   12.26    0.56
 -28  28   0   12.42    0.55
  28 -28   0   12.26    0.55
 -28 -28   0   11.06    0.56
  30  28   0    0.15    0.13
 -30  28   0    0.04    0.11
  30 -28   0    0.04    0.10
 -30 -28   0    0.07    0.13
  32  28   0   10.12    0.52
   0 -30   0    0.02    0.08
   0  30   0    0.09    0.09
  -2  30   0    0.20    0.10
   2 -30   0    0.18    0.09
   2  30   0    0.20    0.11
  -2 -30   0    0.12    0.08
  -4 -30   0   -0.01    0.06
  -4  30   0    0.12    0.07
   4  30   0    0.06    0.08
  -4 -30   0   -0.04    0.07
  -4  30   0    0.10    0.08
   4 -30   0    0.05    0.08
  -6  30   0    0.50    0.13
  -6  30   0    0.54    0.12
   6 -30   0    0.37    0.11
  -6 -30   0    0.39    0.10
  -6 -30   0    0.29    0.10
   6  30   0    0.48    0.14
  -8 -30   0    0.14    0.10
  -8  30   0    0.02    0.08
  -8 -30   0    0.06    0.08
  -8  30   0    0.00    0.07
   8 -30   0   -0.02    0.08
   8  30   0    0.00    0.08
 -10 -30   0    0.23    0.10
 -10  30   0    0.23    0.10
  10 -30   0    0.25    0.10
 -10 -30   0    0.07    0.09
  10  30   0    0.46    0.13
 -10  30   0    0.17    0.09
 -12 -30   0    0.00    0.08
 -12  30   0   -0.05    0.07
 -12 -30   0    0.08    0.08
 -12  30   0    0.12    0.08
  12  30   0   -0.02    0.09
  12 -30   0    0.07    0.08
 -14 -30   0    0.44    0.13
 -14 -30   0    0.46    0.12
  14 -30   0    0.67    0.15
  14  30   0    0.63    0.15
 -14  30   0    0.50    0.13
  16 -30   0   -0.01    0.08
 -16 -30   0   -0.22    0.08
  16  30   0    0.01    0.09
 -16 -30   0    0.06    0.09
 -16  30   0   -0.02    0.08
 -18 -30   0    0.32    0.13
 -18  30   0    0.10    0.10
  18  30   0    0.24    0.12
  18 -30   0    0.28    0.11
 -18 -30   0    0.28    0.12
  20 -30   0    0.03    0.10
  20  30   0    0.02    0.09
 -20 -30   0   -0.04    0.09
 -20  30   0    0.09    0.09
 -20 -30   0    0.09    0.11
 -22 -30   0    1.42    0.22
 -22  30   0    1.54    0.21
  22  30   0    1.43    0.23
  22 -30   0    1.27    0.20
 -24  30   0    0.17    0.12
 -24 -30   0   -0.01    0.11
  24  30   0   -0.05    0.10
  24 -30   0    0.17    0.12
 -26  30   0    0.22    0.13
  26  30   0    0.34    0.14
  26 -30   0    0.28    0.14
 -26 -30   0    0.38    0.16
 -28  30   0    0.13    0.12
 -28 -30   0    0.00    0.11
  28  30   0    0.01    0.10
  28 -30   0   -0.12    0.09
  30  30   0    0.54    0.17
   0 -32   0   45.65    1.21
   0  32   0   46.19    1.26
   2 -32   0   -0.04    0.08
   2  32   0    0.06    0.08
  -2  32   0   -0.01    0.08
  -2 -32   0    0.02    0.09
  -4  32   0   50.11    1.33
   4 -32   0   50.33    1.30
   4  32   0   49.34    1.35
  -4 -32   0   47.89    1.27
  -6 -32   0   -0.06    0.07
  -6  32   0    0.14    0.09
   6 -32   0   -0.05    0.08
   6  32   0    0.09    0.09
  -8 -32   0   45.28    1.21
  -8  32   0   47.30    1.19
   8  32   0   45.31    1.27
   8 -32   0   45.80    1.23
  -8 -32   0   44.75    1.19
  -8  32   0   44.88    1.23
 -10 -32   0   -0.13    0.07
  10 -32   0    0.02    0.08
 -10 -32   0   -0.10    0.08
 -10  32   0    0.06    0.09
  10  32   0    0.05    0.10
 -10  32   0   -0.16    0.06
 -12 -32   0   44.74    1.23
  12 -32   0   44.71    1.24
 -12  32   0   47.64    1.22
  12  32   0   45.00    1.29
 -12 -32   0   45.61    1.22
 -14  32   0   -0.02    0.08
  14 -32   0    0.24    0.11
 -14 -32   0   -0.03    0.09
 -14 -32   0   -0.01    0.09
  14  32   0   -0.08    0.09
  16 -32   0   15.56    0.61
 -16  32   0   15.59    0.59
  16  32   0   17.19    0.65
 -16 -32   0   15.21    0.57
 -16 -32   0   15.57    0.61
 -18 -32   0   -0.07    0.09
 -18  32   0    0.11    0.10
  18  32   0    0.09    0.11
 -18 -32   0    0.08    0.11
  18 -32   0    0.06    0.10
  20 -32   0   15.06    0.60
  20  32   0   14.09    0.61
 -20 -32   0   13.59    0.59
 -20  32   0   15.25    0.59
 -22  32   0    0.10    0.10
  22 -32   0   -0.03    0.10
  22  32   0   -0.08    0.10
 -22 -32   0    0.01    0.11
  24  32   0   16.40    0.68
 -24 -32   0   14.71    0.65
 -24  32   0   15.93    0.64
  24 -32   0   16.34    0.65
 -26  32   0   -0.04    0.10
  26  32   0   -0.06    0.10
  26 -32   0    0.12    0.12
 -26 -32   0    0.19    0.13
 -28 -32   0    6.72    0.49
   0 -34   0   -0.02    0.08
   0  34   0    0.14    0.10
  -2 -34   0    0.31    0.11
   2 -34   0    0.01    0.09
  -2  34   0    0.02    0.09
   2  34   0    0.17    0.11
  -4  34   0   -0.10    0.08
   4 -34   0    0.04    0.09
  -4 -34   0    0.07    0.09
   4  34   0    0.17    0.11
  -6  34   0    0.20    0.11
  -6 -34   0    0.06    0.10
   6  34   0    0.18    0.11
   6 -34   0    0.25    0.10
   8 -34   0   -0.06    0.08
  -8  34   0    0.13    0.09
   8  34   0    0.00    0.09
  -8 -34   0    0.08    0.10
  10 -34   0    0.15    0.10
  10  34   0    0.18    0.13
 -10 -34   0    0.10    0.10
 -10  34   0    0.11    0.09
 -12 -34   0    0.00    0.10
  12 -34   0    0.03    0.10
  12  34   0    0.08    0.11
 -12 -34   0    0.05    0.10
 -12  34   0    0.03    0.09
 -14 -34   0    0.44    0.13
  14 -34   0    0.50    0.15
 -14  34   0    0.41    0.14
 -14 -34   0    0.73    0.15
  14  34   0    0.61    0.17
  16 -34   0   -0.06    0.09
 -16 -34   0    0.00    0.10
 -16 -34   0    0.01    0.10
  16  34   0    0.08    0.12
 -16  34   0    0.04    0.10
  18  34   0    0.13    0.13
  18 -34   0    0.16    0.11
 -18  34   0    0.10    0.11
 -18 -34   0    0.29    0.14
 -20  34   0    0.07    0.10
  20 -34   0   -0.04    0.11
  20  34   0    0.01    0.11
 -20 -34   0   -0.05    0.10
 -22 -34   0    1.13    0.21
  22  34   0    1.28    0.22
  22 -34   0    1.64    0.24
 -22  34   0    0.74    0.17
  24 -34   0    0.03    0.11
 -24 -34   0   -0.03    0.11
 -24  34   0    0.08    0.11
  24  34   0    0.12    0.13
 -26 -34   0    0.14    0.14
   0 -36   0   22.55    0.75
   0  36   0   22.37    0.77
   2  36   0    0.04    0.10
  -2  36   0    0.05    0.10
   2 -36   0   -0.03    0.09
  -2 -36   0    0.07    0.10
   4 -36   0   13.34    0.55
  -4 -36   0   13.75    0.54
  -4  36   0   13.70    0.55
   4  36   0   13.43    0.57
  -6 -36   0   -0.05    0.09
   6  36   0    0.05    0.10
   6 -36   0   -0.03    0.09
  -6  36   0    0.13    0.10
   8 -36   0   22.29    0.75
  -8 -36   0   21.58    0.72
  -8  36   0   20.50    0.72
   8  36   0   21.44    0.77
 -10 -36   0   -0.06    0.09
  10 -36   0    0.08    0.11
  10  36   0    0.04    0.11
 -12  36   0   10.69    0.46
  12  36   0    9.57    0.49
  12 -36   0   10.18    0.48
 -12 -36   0   10.53    0.48
 -14 -36   0    0.06    0.11
  14  36   0    0.08    0.12
  14 -36   0    0.19    0.11
 -14  36   0   -0.10    0.09
 -16  36   0   15.06    0.59
  16 -36   0   13.70    0.60
 -16 -36   0   13.86    0.59
  16  36   0   14.48    0.62
  18 -36   0    0.02    0.10
 -18 -36   0   -0.12    0.10
 -18  36   0    0.15    0.12
  18  36   0    0.15    0.13
  20  36   0   12.74    0.59
 -20 -36   0   11.41    0.55
  20 -36   0   11.84    0.56
 -20  36   0   12.66    0.56
 -22 -36   0   -0.13    0.11
 -22  36   0   -0.19    0.09
   0 -38   0    0.02    0.10
   0  38   0    0.11    0.12
  -2  38   0    0.14    0.11
   2 -38   0    0.28    0.12
  -2 -38   0    0.18    0.12
   2  38   0    0.23    0.12
   4 -38   0    0.00    0.09
  -4 -38   0   -0.05    0.11
  -4  38   0    0.11    0.11
   4  38   0    0.04    0.10
  -6  38   0    0.46    0.14
  -6 -38   0    0.50    0.14
   6  38   0    0.45    0.16
   6 -38   0    0.41    0.14
   8  38   0    0.01    0.11
   8 -38   0    0.16    0.12
  -8 -38   0   -0.15    0.09
  10 -38   0    0.72    0.17
 -10 -38   0    0.68    0.15
  10  38   0    0.78    0.19
  12  38   0    0.12    0.14
  12 -38   0    0.01    0.10
 -12 -38   0    0.10    0.11
  14  38   0    1.97    0.27
  14 -38   0    2.06    0.26
 -16  38   0   -0.06    0.10
  16  38   0    0.07    0.13
  16 -38   0    0.03    0.11
 -18  38   0    0.11    0.11
  18 -38   0    0.07    0.11
   0  40   0   19.03    0.71
   0 -40   0   17.47    0.68
  -2  40   0    0.16    0.13
  -2 -40   0   -0.13    0.10
   2 -40   0   -0.02    0.10
   2  40   0    0.11    0.12
  -4 -40   0   16.43    0.65
   4  40   0   16.57    0.67
   4 -40   0   16.50    0.65
  -4  40   0   16.91    0.65
  -6 -40   0   -0.11    0.10
   6 -40   0   -0.07    0.10
   6  40   0    0.08    0.12
   8 -40   0   29.90    0.95
  -8 -40   0   29.52    0.93
   8  40   0   26.76    0.95
  10  40   0    0.14    0.13
  10 -40   0   -0.16    0.09
  12  40   0    9.89    0.51
  12 -40   0    9.90    0.50
  14 -40   0    0.06    0.14
   0 -42   0   -0.13    0.10
   0  42   0    0.19    0.13
   2 -42   0    0.28    0.13
  -2 -42   0    0.37    0.15
   2  42   0    0.12    0.13
  -2  42   0   -0.02    0.11
   4 -42   0    0.12    0.11
  -4 -42   0    0.12    0.13
   4  42   0   -0.15    0.11
  -4  42   0    0.05    0.13
  -6 -42   0    0.47    0.15
   6 -42   0    0.85    0.19
   6  42   0    0.50    0.17
   8 -42   0    0.03    0.12
  -3   1   1   -0.94    0.02
   3   1  -1   -1.02    0.03
   3  -1   1   -0.94    0.03
   3   1  -1   -0.99    0.03
   3   1   1   -1.01    0.02
   3  -1  -1   -1.01    0.03
   3  -1  -1   -1.00    0.03
   3   1   1   -0.97    0.03
   5   1  -1    0.19    0.03
   5  -1   1    0.25    0.03
   5  -1   1    0.19    0.03
   5  -1   1    0.19    0.03
   5   1  -1    0.23    0.03
   5   1  -1    0.19    0.03
   5  -1   1    0.27    0.03
   5   1  -1    0.18    0.03
   5   1   1    0.20    0.03
   5   1   1    0.20    0.03
   5  -1  -1    0.24    0.03
   5  -1  -1    0.16    0.03
   5   1   1    0.17    0.03
   5   1   1    0.24    0.03
   5  -1  -1    0.14    0.03
   7   1  -1    1.19    0.06
   7  -1   1    1.18    0.07
   7  -1   1    1.22    0.07
   7   1  -1    1.29    0.08
   7   1  -1    1.17    0.06
   7  -1   1    1.29    0.07
   7  -1   1    1.22    0.08
   7   1  -1    1.17    0.08
   7  -1  -1    1.13    0.08
   7  -1  -1    1.22    0.07
   7   1   1    1.24    0.08
   7   1   1    1.21    0.07
   7  -1  -1    1.21    0.06
   7  -1  -1    1.26    0.08
   7   1   1    1.33    0.07
   7   1   1    1.18    0.07
   9  -1   1    0.74    0.06
   9  -1   1    0.86    0.06
   9   1  -1    0.63    0.06
   9  -1   1    0.83    0.06
   9   1  -1    0.72    0.05
   9  -1   1    0.79    0.05
   9   1  -1    0.78    0.05
   9   1  -1    0.81    0.07
   9  -1  -1    0.78    0.07
   9  -1  -1    0.86    0.05
   9   1   1    0.65    0.06
   9  -1  -1    0.68    0.05
   9  -1  -1    0.78    0.06
   9   1   1    0.88    0.06
   9   1   1    0.74    0.05
   9   1   1    0.81    0.06
  11   1  -1    0.34    0.06
  11   1  -1    0.30    0.05
  11  -1   1    0.34    0.06
  11  -1   1    0.29    0.05
  11   1  -1    0.23    0.05
  11   1  -1    0.30    0.04
  11  -1   1    0.31    0.05
  11  -1   1    0.20    0.05
  11  -1  -1    0.36    0.05
  11   1   1    0.30    0.05
  11   1   1    0.32    0.06
  11   1   1    0.27    0.06
  11  -1  -1    0.34    0.06
  11  -1  -1    0.29    0.06
  11  -1  -1    0.26    0.04
  11   1   1    0.31    0.05
  13   1  -1    2.22    0.10
  13   1  -1    2.52    0.11
  13  -1   1    2.30    0.12
  13   1  -1    2.46    0.13
  13   1  -1    2.34    0.13
  13  -1   1    2.49    0.11
  13  -1   1    2.36    0.11
  13  -1   1    2.39    0.12
  13  -1  -1    2.56    0.13
  13  -1  -1    2.38    0.13
  13   1   1    2.50    0.11
  13  -1  -1    2.29    0.11
  13  -1  -1    2.42    0.10
  13   1   1    2.48    0.12
  13   1   1    2.45    0.11
  13   1   1    2.39    0.12
  15   1  -1    0.24    0.06
  15   1  -1    0.22    0.06
  15  -1   1    0.33    0.06
  15   1  -1    0.16    0.04
  15  -1   1    0.24    0.05
  15   1  -1    0.18    0.04
  15  -1   1    0.21    0.05
  15  -1   1    0.25    0.05
  15   1   1    0.24    0.06
  15  -1  -1    0.18    0.06
  15   1   1    0.22    0.05
  15   1   1    0.38    0.06
  15  -1  -1    0.15    0.05
  15  -1  -1    0.30    0.07
  15  -1  -1    0.24    0.05
  15   1   1    0.26    0.06
  17   1  -1    0.39    0.07
  17  -1   1    0.32    0.06
  17   1  -1    0.27    0.05
  17  -1   1    0.26    0.06
 -17   1   1    0.37    0.06
  17  -1   1    0.30    0.05
  17   1  -1    0.35    0.07
  17  -1   1    0.56    0.08
  17  -1  -1    0.45    0.06
  17   1   1    0.31    0.06
 -17  -1   1    0.37    0.06
  17   1   1    0.45    0.07
  17   1   1    0.45    0.06
  17  -1  -1    0.22    0.05
  17  -1  -1    0.36    0.07
  17   1   1    0.29    0.05
  19  -1   1    0.69    0.08
  19   1  -1    0.65    0.09
  19  -1   1    0.81    0.08
  19  -1   1    0.69    0.09
  19   1  -1    0.71    0.09
  19   1  -1    0.76    0.08
  19  -1   1    0.65    0.09
 -19   1   1    0.59    0.08
  19  -1  -1    0.75    0.10
  19   1   1    0.88    0.09
  19  -1  -1    0.56    0.09
 -19  -1   1    0.77    0.08
  19   1   1    0.78    0.10
  19   1   1    0.83    0.09
  19  -1  -1    0.81    0.08
  19   1   1    0.65    0.09
 -21   1   1    0.17    0.05
  21   1  -1    0.16    0.05
  21   1  -1    0.11    0.06
  21  -1   1    0.17    0.06
  21  -1   1    0.18    0.07
  21   1  -1    0.14    0.06
  21  -1   1    0.14    0.05
  21  -1   1    0.18    0.05
  21  -1  -1    0.11    0.04
  21   1   1    0.13    0.06
  21   1   1    0.16    0.05
  21  -1  -1    0.14    0.06
  21   1   1    0.16    0.06
  21   1   1    0.12    0.05
 -21  -1   1    0.15    0.05
  21  -1  -1    0.11    0.06
  23  -1   1    0.63    0.10
  23   1  -1    0.73    0.09
 -23  -1  -1    0.65    0.09
  23  -1   1    0.59    0.10
 -23   1   1    0.86    0.10
  23   1  -1    0.78    0.12
  23   1  -1    0.67    0.11
  23  -1   1    0.84    0.10
  23   1   1    0.67    0.09
  23   1   1    0.66    0.09
  23  -1  -1    0.70    0.09
  23  -1  -1    0.65    0.10
 -23   1  -1    0.70    0.09
  23  -1  -1    0.80    0.12
  23   1   1    0.70    0.11
  23   1   1    0.73    0.11
 -23  -1   1    0.65    0.09
  25   1  -1    0.59    0.10
  25  -1   1    0.75    0.10
  25   1  -1    0.71    0.09
  25  -1   1    0.53    0.10
  25   1  -1    0.65    0.12
  25  -1   1    0.64    0.11
 -25  -1  -1    0.59    0.09
 -25   1   1    0.66    0.09
  25  -1  -1    0.56    0.10
  25  -1  -1    0.74    0.12
  25   1   1    0.62    0.10
  25   1   1    0.50    0.09
 -25  -1   1    0.68    0.09
  25   1   1    0.72    0.11
  25  -1  -1    0.57    0.08
 -25   1  -1    0.49    0.09
  27   1  -1    0.38    0.10
  27  -1   1    0.59    0.11
 -27   1   1    0.58    0.09
  27  -1   1    0.62    0.11
 -27  -1  -1    0.51    0.09
  27   1  -1    0.42    0.10
  27   1   1    0.49    0.11
  27  -1  -1    0.53    0.11
  27  -1  -1    0.39    0.10
  27   1   1    0.63    0.10
 -27   1  -1    0.68    0.10
 -27  -1   1    0.57    0.09
  27   1   1    0.42    0.09
 -29   1   1    0.67    0.11
  29  -1   1    0.60    0.12
  29  -1   1    0.75    0.13
  29   1  -1    0.60    0.12
 -29  -1  -1    0.58    0.10
  29   1  -1    0.58    0.12
 -29  -1   1    0.78    0.10
  29  -1  -1    0.70    0.12
  29   1   1    0.46    0.11
  29  -1  -1    0.52    0.12
  29   1   1    0.64    0.12
 -29   1  -1    0.54    0.10
  31   1  -1    3.55    0.24
 -31   1   1    3.27    0.20
  31   1  -1    3.31    0.24
  31  -1   1    3.40    0.23
  31  -1   1    2.84    0.22
  31   1   1    3.01    0.22
  31   1   1    3.53    0.23
  31  -1  -1    3.73    0.24
  31  -1  -1    2.93    0.22
 -31   1  -1    3.25    0.20
  33   1  -1    0.14    0.09
  33  -1   1    0.02    0.07
  33   1  -1    0.12    0.09
  33  -1   1    0.19    0.09
  33   1   1    0.11    0.09
  33  -1  -1    0.13    0.09
  33  -1  -1    0.26    0.10
  33   1   1    0.40    0.11
  35  -1   1    0.21    0.10
  35  -1   1    0.49    0.13
  35   1  -1    0.39    0.12
 -35  -1  -1    0.07    0.09
  35   1   1    0.46    0.13
  35   1   1    0.35    0.12
 -35  -1   1    0.39    0.13
  35  -1  -1    0.53    0.13
  35  -1  -1    0.43    0.12
  37  -1   1    0.04    0.09
  37   1  -1   -0.06    0.09
  37  -1   1    0.13    0.10
 -37  -1  -1    0.02    0.10
  37  -1  -1    0.08    0.10
  37   1   1    0.11    0.09
  37  -1  -1    0.16    0.11
 -37  -1   1   -0.01    0.10
 -39  -1  -1    3.60    0.31
  39   1  -1    3.31    0.29
 -39   1   1    4.05    0.32
  39   1   1    3.03    0.30
 -39  -1   1    3.56    0.30
 -39   1  -1    3.94    0.32
 -41  -1  -1    0.27    0.15
 -41   1   1    0.20    0.14
 -41  -1   1    0.01    0.13
 -41   1  -1    0.46    0.17
   1   3  -1   -1.03    0.03
  -1   3   1   -0.98    0.03
   1  -3   1   -0.98    0.02
  -1  -3  -1   -1.04    0.03
   1  -3   1   -0.98    0.03
   1  -3  -1   -0.97    0.03
  -1   3  -1   -0.98    0.03
  -1  -3   1   -1.01    0.03
   1   3   1   -0.99    0.03
   3  -3   1   -0.05    0.02
  -3  -3  -1   -0.06    0.02
   3  -3   1   -0.05    0.02
   3   3  -1   -0.04    0.02
  -3   3   1   -0.04    0.02
   3   3  -1   -0.04    0.02
   3  -3  -1   -0.05    0.01
  -3  -3   1   -0.07    0.02
   3  -3  -1   -0.05    0.02
   3   3   1   -0.03    0.02
  -3   3  -1   -0.06    0.01
   3   3   1   -0.04    0.02
   5   3  -1    0.01    0.04
   5  -3   1    0.14    0.04
  -5  -3  -1    0.04    0.03
  -5   3   1    0.16    0.04
   5  -3   1   -0.03    0.03
   5   3  -1    0.15    0.04
   5  -3   1    0.08    0.03
   5   3   1    0.03    0.03
  -5   3  -1    0.09    0.03
   5   3   1    0.01    0.04
   5  -3  -1    0.14    0.04
   5  -3  -1    0.09    0.03
  -5  -3   1    0.07    0.04
   7  -3   1   -0.04    0.04
   7  -3   1    0.04    0.04
   7   3  -1   -0.01    0.05
   7   3  -1    0.03    0.03
   7   3  -1    0.11    0.04
   7  -3   1    0.03    0.04
  -7   3   1    0.02    0.03
  -7  -3   1   -0.06    0.04
  -7   3  -1   -0.03    0.04
   7  -3  -1   -0.05    0.04
   7   3   1   -0.01    0.04
   7   3   1   -0.01    0.04
   7   3   1   -0.02    0.03
   7   3   1    0.01    0.04
   7  -3  -1   -0.04    0.04
   7  -3  -1    0.07    0.04
   9  -3   1    0.02    0.03
   9   3  -1   -0.01    0.02
   9   3  -1   -0.03    0.02
   9  -3   1   -0.03    0.02
   9  -3   1    0.00    0.03
   9  -3   1   -0.05    0.02
   9   3  -1    0.02    0.03
   9   3  -1   -0.04    0.03
   9  -3  -1   -0.01    0.03
   9   3   1   -0.01    0.03
   9  -3  -1   -0.02    0.02
   9  -3  -1   -0.01    0.03
   9   3   1   -0.02    0.03
   9   3   1   -0.02    0.03
   9  -3  -1   -0.05    0.03
   9   3   1   -0.02    0.02
  11   3  -1    0.62    0.06
  11  -3   1    0.57    0.06
  11   3  -1    0.43    0.06
  11  -3   1    0.43    0.06
  11   3  -1    0.60    0.07
  11   3  -1    0.57    0.05
  11  -3   1    0.44    0.05
  11  -3   1    0.66    0.06
  11  -3  -1    0.61    0.06
  11  -3  -1    0.52    0.07
  11  -3  -1    0.54    0.05
  11   3   1    0.61    0.06
  11   3   1    0.62    0.05
  11  -3  -1    0.57    0.06
  11   3   1    0.50    0.06
  11   3   1    0.59    0.07
  13  -3   1    1.83    0.10
  13   3  -1    1.87    0.09
  13   3  -1    2.08    0.10
 -13   3   1    1.75    0.10
  13   3  -1    2.15    0.12
  13   3  -1    1.91    0.12
  13  -3   1    2.04    0.10
  13  -3   1    1.99    0.11
  13  -3   1    2.03    0.11
  13  -3  -1    2.02    0.09
  13  -3  -1    1.91    0.11
  13   3   1    1.97    0.12
  13   3   1    1.94    0.10
  13   3   1    2.07    0.11
  13   3   1    2.15    0.09
  13  -3  -1    2.00    0.10
  13  -3  -1    1.77    0.11
  15   3  -1    0.46    0.06
  15  -3   1    0.37    0.06
  15   3  -1    0.44    0.08
  15   3  -1    0.49    0.06
  15  -3   1    0.44    0.06
  15   3  -1    0.37    0.07
  15  -3   1    0.45    0.06
  15  -3   1    0.49    0.07
 -15   3   1    0.58    0.07
  15   3   1    0.41    0.07
  15  -3  -1    0.40    0.07
  15   3   1    0.43    0.05
  15  -3  -1    0.42    0.07
  15  -3  -1    0.43    0.05
  15   3   1    0.40    0.06
  15   3   1    0.49    0.07
  17  -3   1    0.38    0.07
 -17   3   1    0.25    0.06
  17  -3   1    0.30    0.05
  17   3  -1    0.24    0.06
  17  -3   1    0.24    0.06
  17   3  -1    0.18    0.06
  17  -3   1    0.20    0.05
  17   3  -1    0.27    0.05
  17   3   1    0.33    0.05
  17  -3  -1    0.20    0.04
  17   3   1    0.27    0.06
 -17  -3   1    0.26    0.05
  17  -3  -1    0.23    0.06
  17   3   1    0.34    0.06
  17   3   1    0.23    0.06
  17  -3  -1    0.20    0.06
  19  -3   1    0.48    0.08
  19   3  -1    0.33    0.08
  19  -3   1    0.42    0.07
  19   3  -1    0.49    0.07
  19  -3   1    0.38    0.06
 -19   3   1    0.44    0.07
  19  -3   1    0.39    0.08
  19   3  -1    0.31    0.07
  19  -3  -1    0.44    0.06
  19  -3  -1    0.60    0.09
  19   3   1    0.44    0.08
  19   3   1    0.46    0.07
  19  -3  -1    0.41    0.08
  19   3   1    0.44    0.06
 -19  -3   1    0.41    0.06
  19   3   1    0.56    0.08
  21   3  -1    0.43    0.08
  21   3  -1    0.44    0.07
  21  -3   1    0.32    0.07
  21  -3   1    0.27    0.07
  21  -3   1    0.34    0.08
 -21   3   1    0.36    0.07
  21   3  -1    0.39    0.08
  21  -3   1    0.38    0.06
  21   3   1    0.36    0.08
  21  -3  -1    0.41    0.09
  21   3   1    0.36    0.06
 -21  -3   1    0.37    0.06
  21   3   1    0.30    0.07
  21  -3  -1    0.44    0.08
  21   3   1    0.27    0.06
  21  -3  -1    0.33    0.06
  23   3  -1    0.05    0.06
  23  -3   1   -0.04    0.03
  23   3  -1    0.00    0.06
  23  -3   1    0.00    0.05
 -23   3   1    0.10    0.05
  23  -3   1    0.04    0.05
  23   3  -1   -0.02    0.04
 -23   3  -1    0.09    0.05
  23  -3  -1    0.01    0.05
  23  -3  -1    0.07    0.06
  23   3   1    0.02    0.04
  23   3   1   -0.03    0.04
 -23  -3   1    0.00    0.04
  23   3   1    0.00    0.05
  23   3   1   -0.02    0.05
  23  -3  -1    0.00    0.04
  25   3  -1    0.27    0.08
 -25  -3  -1    0.33    0.07
  25  -3   1    0.18    0.07
  25  -3   1    0.30    0.06
  25  -3   1    0.25    0.08
  25   3  -1    0.15    0.08
 -25   3   1    0.31    0.08
  25   3  -1    0.22    0.07
  25   3   1    0.15    0.07
 -25  -3   1    0.18    0.06
 -25   3  -1    0.32    0.08
  25   3   1    0.22    0.07
  25  -3  -1    0.23    0.08
  25  -3  -1    0.35    0.09
  25   3   1    0.24    0.08
  27   3  -1    0.12    0.06
  27  -3   1    0.13    0.08
  27  -3   1    0.24    0.08
 -27  -3  -1    0.07    0.06
 -27   3   1    0.04    0.07
  27   3  -1    0.14    0.07
  27   3  -1    0.09    0.07
  27   3   1    0.03    0.05
  27  -3  -1    0.09    0.07
  27  -3  -1    0.05    0.07
  27   3   1    0.06    0.06
 -27   3  -1    0.03    0.06
 -27  -3   1    0.12    0.06
  27   3   1    0.18    0.08
  29  -3   1    0.27    0.09
 -29   3   1    0.32    0.09
  29  -3   1    0.16    0.08
  29   3  -1    0.23    0.09
  29   3  -1    0.21    0.09
  29   3   1    0.31    0.09
  29   3   1    0.16    0.08
 -29   3  -1    0.09    0.07
  29  -3  -1    0.17    0.08
  29  -3  -1    0.24    0.09
 -29  -3   1    0.14    0.09
 -31   3   1    2.73    0.19
  31  -3   1    2.44    0.20
 -31  -3  -1    2.80    0.22
  31  -3   1    2.50    0.21
  31   3  -1    2.38    0.24
  31  -3  -1    2.73    0.22
  31   3   1    2.44    0.22
 -31  -3   1    2.65    0.21
 -31   3  -1    2.58    0.19
  31  -3  -1    2.35    0.21
  33  -3   1    0.16    0.09
 -33   3   1    0.49    0.11
  33  -3   1    0.33    0.10
  33   3  -1    0.25    0.10
 -33  -3  -1    0.25    0.11
  33   3   1    0.16    0.10
 -33   3  -1    0.14    0.08
  33  -3  -1    0.25    0.10
  33  -3  -1    0.23    0.10
 -33  -3   1    0.17    0.10
  35   3  -1    0.13    0.10
 -35  -3  -1    0.24    0.12
  35  -3   1    0.19    0.09
  35  -3   1    0.28    0.11
  35  -3  -1    0.25    0.11
  35  -3  -1    0.34    0.11
 -35  -3   1    0.17    0.11
  35   3   1    0.24    0.11
  37   3  -1    0.03    0.10
 -37  -3  -1    0.23    0.12
  37  -3   1    0.04    0.08
 -37  -3   1   -0.10    0.09
  37   3   1   -0.07    0.09
  37  -3  -1   -0.03    0.09
  39  -3   1    0.77    0.16
 -39  -3  -1    0.96    0.19
  39   3  -1    0.58    0.16
  39  -3  -1    0.96    0.18
 -39  -3   1    0.79    0.17
  39   3   1    0.90    0.18
  41  -3   1    0.21    0.12
 -41  -3  -1    0.27    0.14
  41   3  -1    0.37    0.15
 -41  -3   1    0.51    0.17
  41   3   1    0.09    0.11
  41  -3  -1    0.72    0.17
  -1   5   1    0.09    0.02
   1  -5   1    0.04    0.02
  -1  -5  -1    0.03    0.02
  -1  -5  -1    0.10    0.03
   1  -5   1    0.08    0.02
   1   5  -1    0.10    0.03
  -1   5   1    0.10    0.03
   1   5  -1    0.05    0.02
  -1  -5   1    0.09    0.03
   1   5   1    0.07    0.02
   1   5   1    0.07    0.03
   1  -5  -1    0.07    0.02
  -1   5  -1    0.07    0.03
   1  -5  -1    0.05    0.02
  -3  -5  -1    0.48    0.05
   3  -5   1    0.56    0.05
   3  -5   1    0.45    0.05
   3   5  -1    0.51    0.05
   3   5  -1    0.39    0.06
  -3   5   1    0.48    0.05
  -3  -5   1    0.37    0.05
   3  -5  -1    0.36    0.04
   3   5   1    0.40    0.05
   3   5   1    0.47    0.05
   3  -5  -1    0.40    0.05
  -3   5  -1    0.51    0.05
   5   5  -1   -0.16    0.04
  -5  -5  -1   -0.18    0.03
  -5   5   1   -0.15    0.04
   5  -5   1   -0.13    0.04
  -5   5   1   -0.10    0.03
   5  -5   1   -0.13    0.04
   5   5  -1   -0.08    0.04
   5  -5   1   -0.16    0.02
  -5  -5   1   -0.04    0.04
   5   5   1   -0.17    0.04
   5  -5  -1   -0.11    0.03
  -5   5  -1   -0.06    0.04
   5   5   1   -0.17    0.04
   5  -5  -1   -0.06    0.04
   7  -5   1    0.18    0.03
   7   5  -1    0.20    0.04
   7   5  -1    0.20    0.04
  -7   5   1    0.31    0.05
  -7   5   1    0.21    0.03
   7  -5   1    0.22    0.04
  -7  -5  -1    0.21    0.04
   7  -5   1    0.16    0.04
   7  -5  -1    0.23    0.04
   7   5   1    0.17    0.02
  -7  -5   1    0.25    0.04
   7   5   1    0.26    0.04
   7  -5  -1    0.17    0.03
  -7   5  -1    0.24    0.04
   7   5   1    0.18    0.04
  -9  -5  -1    0.62    0.06
   9   5  -1    0.48    0.07
   9   5  -1    0.60    0.04
   9  -5   1    0.69    0.05
   9   5  -1    0.66    0.06
   9  -5   1    0.57    0.07
  -9   5   1    0.66    0.05
   9  -5   1    0.55    0.06
  -9   5   1    0.54    0.06
   9   5   1    0.64    0.04
   9   5   1    0.38    0.06
   9   5   1    0.60    0.06
  -9   5  -1    0.62    0.05
   9  -5  -1    0.49    0.06
   9  -5  -1    0.59    0.05
  -9  -5   1    0.62    0.07
 -11  -5  -1    3.30    0.14
  11  -5   1    3.33    0.13
  11   5  -1    3.14    0.10
 -11   5   1    3.11    0.11
  11   5  -1    3.34    0.13
  11  -5   1    3.21    0.14
  11   5  -1    3.37    0.15
  11  -5   1    3.53    0.14
  11   5   1    3.37    0.11
  11  -5  -1    3.28    0.14
 -11   5  -1    3.25    0.12
  11   5   1    3.07    0.13
  11  -5  -1    3.08    0.13
 -11  -5   1    2.94    0.14
  11   5   1    3.28    0.15
  13   5  -1    0.12    0.05
  13   5  -1    0.10    0.03
  13  -5   1    0.12    0.05
  13  -5   1    0.11    0.04
  13  -5   1    0.08    0.05
 -13   5   1    0.10    0.04
 -13  -5  -1    0.11    0.05
  13   5  -1    0.07    0.04
 -13   5   1    0.13    0.05
 -13  -5   1    0.02    0.04
  13   5   1    0.12    0.05
  13   5   1    0.11    0.05
  13  -5  -1    0.08    0.04
  13   5   1    0.13    0.03
  13  -5  -1    0.07    0.05
 -13   5  -1    0.12    0.04
 -15   5   1    4.33    0.15
 -15  -5  -1    4.36    0.18
  15   5  -1    4.58    0.17
  15   5  -1    4.33    0.14
  15  -5   1    4.64    0.17
 -15   5   1    4.47    0.18
  15  -5   1    4.06    0.18
  15   5  -1    4.46    0.20
  15  -5   1    4.59    0.18
  15  -5  -1    4.11    0.17
  15  -5  -1    4.22    0.19
  15   5   1    4.26    0.19
 -15  -5   1    4.22    0.18
  15   5   1    4.38    0.17
  15   5   1    4.37    0.14
 -15   5  -1    4.37    0.16
  17  -5   1    0.03    0.04
  17   5  -1    0.01    0.04
 -17   5   1    0.06    0.04
 -17  -5  -1   -0.02    0.04
  17   5  -1   -0.01    0.03
  17  -5   1   -0.01    0.04
  17  -5   1   -0.01    0.03
 -17   5   1   -0.04    0.03
  17   5   1   -0.03    0.02
  17   5   1    0.01    0.04
 -17  -5   1   -0.01    0.04
  17  -5  -1   -0.05    0.04
  17  -5  -1    0.01    0.03
 -17   5  -1    0.01    0.03
 -17  -5   1   -0.04    0.02
  17   5   1    0.03    0.04
 -19  -5  -1    0.47    0.08
  19  -5   1    0.68    0.09
  19   5  -1    0.82    0.11
  19  -5   1    0.70    0.09
  19  -5   1    0.56    0.09
 -19   5   1    0.54    0.08
 -19   5   1    0.57    0.07
  19   5  -1    0.55    0.08
 -19  -5   1    0.51    0.09
  19  -5  -1    0.59    0.08
  19  -5  -1    0.56    0.09
 -19   5  -1    0.55    0.08
  19   5   1    0.60    0.10
 -19  -5   1    0.55    0.06
  19   5   1    0.56    0.06
  19   5   1    0.56    0.08
  21  -5   1    0.46    0.08
 -21   5   1    0.37    0.07
  21  -5   1    0.37    0.08
 -21   5   1    0.55    0.07
  21   5  -1    0.37    0.08
 -21  -5  -1    0.45    0.09
  21   5  -1    0.27    0.06
  21   5   1    0.30    0.07
 -21  -5   1    0.44    0.06
 -21   5  -1    0.33    0.07
 -21   5  -1    0.27    0.07
 -21  -5   1    0.46    0.08
  21  -5  -1    0.45    0.09
  21  -5  -1    0.46    0.08
  21   5   1    0.56    0.10
  21   5   1    0.45    0.06
 -23   5   1    0.42    0.08
  23   5  -1    0.23    0.07
  23   5  -1    0.27    0.08
  23  -5   1    0.40    0.09
 -23  -5  -1    0.31    0.07
 -23  -5  -1    0.31    0.08
  23  -5   1    0.32    0.08
 -23   5  -1    0.26    0.08
 -23  -5   1    0.32    0.08
  23   5   1    0.39    0.08
 -23  -5   1    0.37    0.06
  23   5   1    0.37    0.09
  23  -5  -1    0.18    0.07
  23  -5  -1    0.37    0.08
 -23   5  -1    0.34    0.07
 -25   5   1    0.85    0.11
  25   5  -1    0.72    0.10
  25  -5   1    0.94    0.13
  25   5  -1    0.72    0.12
 -25  -5  -1    0.75    0.09
  25  -5   1    1.10    0.13
 -25  -5  -1    0.64    0.10
  25   5   1    0.75    0.10
  25  -5  -1    0.85    0.12
 -25  -5   1    0.74    0.12
  25   5   1    1.04    0.14
  25  -5  -1    0.84    0.13
 -25   5  -1    0.83    0.11
  27   5  -1    0.59    0.10
  27   5  -1    0.60    0.12
  27  -5   1    0.74    0.12
 -27   5   1    0.49    0.10
  27  -5   1    0.67    0.12
 -27  -5  -1    0.60    0.11
  27   5   1    0.91    0.14
  27  -5  -1    0.45    0.11
  27  -5  -1    0.68    0.12
  27   5   1    0.86    0.12
 -27  -5   1    0.61    0.12
 -27   5  -1    0.64    0.11
  29   5  -1    0.51    0.12
 -29  -5  -1    0.39    0.11
  29  -5   1    0.23    0.08
 -29   5   1    0.45    0.10
  29  -5   1    0.30    0.10
  29   5   1    0.33    0.09
 -29  -5   1    0.20    0.09
  29   5   1    0.44    0.12
  29  -5  -1    0.23    0.10
 -29   5  -1    0.33    0.10
  29  -5  -1    0.26    0.09
 -31  -5  -1    1.17    0.16
  31   5  -1    1.06    0.16
  31  -5   1    1.21    0.16
  31  -5   1    1.21    0.17
 -31   5   1    1.32    0.16
  31  -5  -1    1.21    0.16
 -31  -5   1    1.53    0.18
 -31   5  -1    1.28    0.15
  31  -5  -1    1.14    0.16
  31   5   1    0.85    0.15
 -33   5   1    0.08    0.09
  33   5  -1    0.19    0.10
  33  -5   1    0.24    0.10
 -33  -5  -1    0.17    0.11
 -33  -5   1    0.23    0.11
  33   5   1    0.25    0.11
  33  -5  -1    0.15    0.10
 -33   5  -1    0.43    0.11
  33  -5  -1    0.12    0.08
 -35  -5  -1    1.23    0.18
 -35   5   1    1.09    0.16
  35  -5   1    1.04    0.17
  35   5  -1    1.01    0.18
 -35  -5   1    1.23    0.19
  35  -5  -1    1.24    0.18
  35   5   1    1.08    0.18
 -35   5  -1    1.20    0.16
  37  -5   1    0.30    0.12
  37   5  -1    0.46    0.14
 -37  -5  -1    0.44    0.14
  37  -5  -1    0.63    0.15
  37   5   1    0.52    0.14
 -37  -5   1    0.64    0.16
 -39  -5  -1    0.17    0.13
  39   5  -1    0.05    0.11
  39  -5   1    0.19    0.11
  39  -5  -1    0.17    0.12
  39   5   1    0.22    0.12
 -39  -5   1    0.23    0.14
  41   5  -1    1.21    0.22
  41  -5   1    0.82    0.18
 -41  -5  -1    1.02    0.21
 -41  -5   1    0.87    0.19
  41  -5  -1    0.77    0.18
  41   5   1    1.36    0.21
   1  -7   1    0.98    0.06
   1  -7   1    1.00    0.08
  -1   7   1    1.04    0.08
   1   7  -1    0.99    0.06
  -1  -7  -1    1.05    0.07
  -1   7   1    1.06    0.07
   1   7  -1    1.11    0.07
  -1  -7  -1    0.96    0.07
  -1  -7   1    1.13    0.08
  -1   7  -1    1.03    0.09
  -1   7  -1    1.04    0.07
   1  -7  -1    1.06    0.07
   1   7   1    0.94    0.06
   1  -7  -1    1.01    0.07
   1   7   1    1.05    0.08
  -3  -7  -1    0.51    0.05
   3   7  -1    0.54    0.06
  -3   7   1    0.58    0.06
   3  -7   1    0.57    0.04
  -3   7   1    0.63    0.07
   3  -7   1    0.72    0.06
   3   7  -1    0.60    0.07
   3  -7   1    0.58    0.06
   3  -7  -1    0.57    0.05
   3   7   1    0.59    0.06
   3   7   1    0.59    0.04
  -3   7  -1    0.68    0.06
  -3  -7   1    0.55    0.06
   3  -7  -1    0.69    0.06
   3   7   1    0.47    0.06
  -5   7   1   -0.04    0.03
   5  -7   1    0.00    0.02
  -5  -7  -1   -0.08    0.03
   5   7  -1    0.06    0.04
  -5   7   1   -0.01    0.03
   5  -7   1    0.02    0.03
   5   7  -1   -0.01    0.04
   5  -7   1    0.02    0.04
  -5  -7   1   -0.07    0.03
  -5   7  -1   -0.06    0.03
   5  -7  -1   -0.03    0.03
   5   7   1   -0.04    0.03
   5  -7  -1   -0.06    0.03
   5   7   1    0.02    0.04
   7  -7   1   -0.04    0.03
   7  -7   1   -0.13    0.02
  -7   7   1   -0.13    0.02
   7  -7   1   -0.11    0.02
   7   7  -1   -0.11    0.03
  -7  -7  -1   -0.11    0.02
  -7   7   1   -0.08    0.02
   7   7  -1   -0.02    0.03
   7   7   1   -0.09    0.03
  -7   7  -1   -0.11    0.02
   7   7   1   -0.11    0.03
   7  -7  -1   -0.14    0.02
   7   7   1   -0.12    0.01
  -7  -7   1   -0.09    0.03
   7  -7  -1   -0.11    0.02
  -9   7   1    5.12    0.18
   9  -7   1    4.88    0.18
   9   7  -1    4.91    0.18
  -9  -7  -1    5.12    0.17
   9  -7   1    4.99    0.15
   9   7  -1    4.94    0.18
   9  -7   1    4.77    0.18
  -9   7   1    5.15    0.15
   9  -7  -1    4.60    0.18
   9   7   1    4.64    0.18
   9  -7  -1    5.04    0.16
  -9   7  -1    5.02    0.16
  -9  -7   1    4.64    0.17
   9   7   1    4.89    0.13
 -11   7   1    1.46    0.07
  11  -7   1    1.26    0.10
 -11  -7  -1    1.42    0.09
  11   7  -1    1.30    0.10
  11   7  -1    1.51    0.10
  11  -7   1    1.27    0.07
 -11   7   1    1.40    0.09
  11   7  -1    1.32    0.05
  11  -7   1    1.32    0.09
  11  -7  -1    1.40    0.08
  11   7   1    1.34    0.09
  11  -7  -1    1.33    0.10
 -11   7  -1    1.32    0.08
  11   7   1    1.36    0.10
 -11  -7   1    1.36    0.09
  11   7   1    1.41    0.06
 -13   7   1    2.30    0.13
  13   7  -1    2.28    0.14
  13  -7   1    2.33    0.11
  13  -7   1    2.39    0.13
 -13   7   1    2.45    0.10
  13   7  -1    2.32    0.08
  13   7  -1    2.63    0.13
 -13  -7  -1    2.46    0.13
  13  -7   1    2.40    0.13
  13   7   1    2.53    0.09
 -13  -7   1    2.33    0.13
  13  -7  -1    2.28    0.13
 -13   7  -1    2.35    0.11
  13   7   1    2.46    0.13
  13   7   1    2.30    0.14
  13  -7  -1    2.45    0.12
 -15  -7  -1    1.26    0.10
  15  -7   1    0.99    0.10
  15   7  -1    1.22    0.09
 -15   7   1    1.21    0.10
  15   7  -1    1.37    0.12
  15  -7   1    1.22    0.09
 -15   7   1    1.20    0.08
  15  -7   1    1.18    0.10
 -15  -7   1    1.16    0.10
  15   7   1    1.25    0.10
  15  -7  -1    1.15    0.10
  15   7   1    1.31    0.07
 -15   7  -1    1.18    0.08
  15   7   1    1.31    0.11
  15  -7  -1    1.27    0.09
 -17  -7  -1   -0.03    0.04
 -17   7   1    0.01    0.03
  17   7  -1   -0.03    0.04
  17  -7   1    0.04    0.04
  17   7  -1    0.01    0.05
  17  -7   1   -0.02    0.03
 -17   7   1    0.02    0.04
  17  -7   1   -0.05    0.04
  17   7   1   -0.01    0.03
 -17   7  -1    0.00    0.03
  17  -7  -1    0.02    0.04
  17  -7  -1   -0.04    0.03
 -17  -7   1   -0.01    0.02
 -17  -7   1   -0.01    0.04
  17   7   1   -0.01    0.04
  17   7   1   -0.01    0.04
  19  -7   1    1.10    0.12
  19   7  -1    1.05    0.12
 -19   7   1    1.40    0.11
  19   7  -1    1.11    0.10
 -19   7   1    1.13    0.09
  19  -7   1    1.39    0.11
  19  -7   1    1.39    0.11
 -19  -7  -1    1.27    0.11
 -19   7  -1    1.15    0.12
 -19  -7   1    1.38    0.08
 -19  -7   1    1.35    0.12
  19  -7  -1    1.41    0.13
  19   7   1    1.40    0.13
  19   7   1    1.26    0.08
  19   7   1    1.19    0.11
  19  -7  -1    1.15    0.10
 -19   7  -1    1.20    0.09
 -21  -7  -1    0.22    0.07
  21   7  -1    0.26    0.07
 -21   7   1    0.24    0.07
  21  -7   1    0.34    0.08
 -21   7   1    0.31    0.06
  21  -7   1    0.26    0.07
  21   7  -1    0.33    0.08
  21  -7  -1    0.20    0.06
 -21   7  -1    0.21    0.06
 -21  -7   1    0.27    0.05
  21   7   1    0.28    0.05
  21   7   1    0.42    0.09
  21   7   1    0.26    0.07
  21  -7  -1    0.22    0.07
 -21  -7   1    0.35    0.09
 -21   7  -1    0.24    0.07
 -23   7   1    0.68    0.10
 -23  -7  -1    0.90    0.12
  23   7  -1    0.97    0.13
  23  -7   1    0.70    0.11
  23  -7   1    0.62    0.10
  23   7  -1    0.91    0.11
  23  -7  -1    0.92    0.13
 -23   7  -1    0.65    0.08
  23   7   1    0.81    0.12
 -23   7  -1    0.60    0.10
  23  -7  -1    0.67    0.10
 -23  -7   1    0.77    0.11
  23   7   1    0.90    0.12
 -25   7   1    0.13    0.07
  25   7  -1    0.04    0.05
  25   7  -1    0.05    0.06
  25  -7   1   -0.02    0.04
 -25  -7  -1    0.00    0.06
  25  -7   1   -0.01    0.06
 -25  -7   1    0.08    0.07
  25  -7  -1    0.00    0.05
  25   7   1    0.04    0.07
  25  -7  -1    0.02    0.07
  25   7   1    0.02    0.05
 -25   7  -1    0.01    0.06
  27  -7   1   -0.01    0.05
 -27  -7  -1   -0.04    0.06
 -27   7   1    0.08    0.07
  27  -7   1    0.08    0.07
  27   7  -1   -0.03    0.07
  27   7  -1    0.01    0.05
  27   7   1   -0.03    0.07
  27   7   1    0.05    0.07
 -27  -7   1    0.05    0.08
  27  -7  -1    0.00    0.06
  27  -7  -1   -0.01    0.06
 -27   7  -1    0.06    0.07
  29  -7   1    0.04    0.06
 -29  -7  -1    0.00    0.07
 -29   7   1    0.03    0.07
  29  -7   1    0.00    0.07
  29   7  -1   -0.01    0.08
  29   7  -1    0.08    0.07
  29   7   1    0.00    0.07
 -29  -7   1   -0.09    0.07
  29   7   1   -0.06    0.06
 -29   7  -1   -0.06    0.07
  29  -7  -1    0.06    0.07
  29  -7  -1    0.01    0.06
 -31   7   1    1.83    0.19
  31  -7   1    1.45    0.18
 -31  -7  -1    1.36    0.17
  31   7  -1    1.94    0.22
 -31  -7   1    1.72    0.20
  31  -7  -1    1.53    0.19
  31  -7  -1    1.55    0.18
 -31   7  -1    1.81    0.18
  31   7   1    1.49    0.19
  33  -7   1    0.62    0.14
 -33   7   1    0.86    0.14
  33   7  -1    0.83    0.16
 -33  -7  -1    0.79    0.15
  33   7   1    0.88    0.17
  33  -7  -1    0.83    0.15
 -33  -7   1    0.67    0.15
 -33   7  -1    0.81    0.14
 -35  -7  -1    1.03    0.17
  35   7  -1    1.24    0.20
  35  -7   1    0.85    0.16
 -35   7   1    1.17    0.17
  35  -7  -1    0.93    0.17
 -35  -7   1    0.88    0.17
  35   7   1    0.81    0.17
 -35   7  -1    1.05    0.17
  37  -7   1    0.26    0.12
 -37   7   1    0.03    0.10
 -37  -7  -1    0.09    0.12
  37   7  -1    0.01    0.10
  37   7   1    0.29    0.12
  37  -7  -1    0.23    0.12
 -37  -7   1   -0.07    0.10
 -37   7  -1    0.15    0.11
  39  -7   1    0.30    0.13
 -39  -7  -1    0.28    0.15
  39   7  -1    0.40    0.14
  39  -7  -1    0.45    0.15
  39   7   1    0.13    0.11
 -39  -7   1    0.18    0.13
  41  -7   1    0.81    0.16
  41   7  -1    0.56    0.17
  41   7   1    0.39    0.15
  41  -7  -1    0.48    0.15
 -41  -7   1    0.75    0.18
   1   9  -1    0.34    0.04
  -1   9   1    0.37    0.06
  -1   9   1    0.35    0.05
   1  -9   1    0.24    0.05
   1   9  -1    0.32    0.06
   1  -9   1    0.37    0.04
  -1  -9  -1    0.30    0.05
  -1  -9  -1    0.37    0.05
  -1   9  -1    0.35    0.04
  -1   9  -1    0.31    0.06
   1   9   1    0.32    0.05
  -1  -9   1    0.28    0.04
   1   9   1    0.41    0.05
  -1  -9   1    0.25    0.04
   1  -9  -1    0.30    0.04
   1  -9  -1    0.30    0.05
   3   9  -1    0.02    0.03
  -3   9   1    0.01    0.03
   3  -9   1    0.03    0.03
   3  -9   1   -0.01    0.02
  -3  -9  -1    0.02    0.03
  -3  -9  -1   -0.02    0.03
  -3   9   1    0.04    0.04
   3   9  -1    0.00    0.02
   3   9  -1    0.01    0.04
  -3   9  -1    0.05    0.03
   3  -9  -1    0.07    0.03
   3  -9  -1    0.01    0.03
   3   9   1   -0.04    0.02
  -3   9  -1    0.05    0.04
   3   9   1    0.02    0.04
  -3  -9   1   -0.03    0.03
   5  -9   1    0.28    0.05
   5  -9   1    0.27    0.05
   5   9  -1    0.21    0.05
  -5   9   1    0.22    0.05
  -5   9   1    0.39    0.06
   5   9  -1    0.39    0.07
  -5  -9  -1    0.31    0.05
   5  -9   1    0.22    0.03
   5   9   1    0.22    0.03
   5   9   1    0.20    0.05
   5  -9  -1    0.28    0.04
   5  -9  -1    0.18    0.05
  -5   9  -1    0.27    0.05
  -5  -9   1    0.23    0.05
   5   9   1    0.35    0.06
   7  -9   1    1.51    0.07
   7  -9   1    1.79    0.11
  -7   9   1    1.55    0.09
   7   9  -1    1.55    0.10
   7   9  -1    1.80    0.11
  -7   9   1    1.40    0.08
   7   9   1    1.88    0.11
   7  -9  -1    1.62    0.08
   7  -9  -1    1.70    0.10
   7   9   1    1.81    0.10
  -7   9  -1    1.51    0.08
   9   9  -1    0.06    0.04
   9  -9   1    0.08    0.03
  -9  -9  -1    0.05    0.04
   9  -9   1   -0.01    0.04
   9   9  -1   -0.06    0.03
  -9   9   1   -0.04    0.03
  -9   9   1    0.04    0.03
   9  -9   1    0.05    0.04
  -9   9  -1    0.02    0.03
   9   9   1    0.02    0.02
   9  -9  -1    0.01    0.03
  -9  -9   1   -0.09    0.03
   9   9   1   -0.03    0.04
   9   9   1   -0.02    0.04
   9  -9  -1    0.02    0.04
  11   9  -1    0.05    0.04
  11  -9   1   -0.06    0.04
 -11   9   1    0.04    0.04
 -11   9   1    0.03    0.03
  11   9  -1   -0.02    0.04
  11  -9   1   -0.04    0.02
 -11  -9  -1   -0.08    0.03
  11  -9   1   -0.05    0.03
 -11  -9   1    0.00    0.04
  11  -9  -1   -0.03    0.04
  11   9   1    0.02    0.02
  11  -9  -1    0.02    0.03
  11   9   1   -0.04    0.04
 -11   9  -1    0.02    0.03
  11   9   1   -0.05    0.04
  13   9  -1    0.09    0.05
 -13   9   1    0.07    0.05
 -13  -9  -1    0.05    0.04
  13   9  -1    0.07    0.05
  13  -9   1    0.12    0.05
 -13   9   1    0.11    0.04
  13  -9   1    0.11    0.04
  13  -9   1    0.02    0.04
  13  -9  -1    0.12    0.04
  13  -9  -1    0.07    0.05
 -13  -9   1    0.06    0.05
  13   9   1    0.03    0.05
 -13   9  -1    0.11    0.04
 -13  -9   1    0.12    0.02
  13   9   1    0.12    0.02
  13   9   1    0.13    0.05
  15   9  -1    0.48    0.08
 -15   9   1    0.31    0.06
  15  -9   1    0.46    0.06
 -15   9   1    0.36    0.05
  15  -9   1    0.27    0.07
  15   9  -1    0.50    0.08
 -15  -9  -1    0.25    0.06
  15  -9   1    0.38    0.07
 -15   9  -1    0.37    0.06
  15   9   1    0.39    0.04
  15  -9  -1    0.48    0.07
  15  -9  -1    0.30    0.07
 -15  -9   1    0.29    0.07
  15   9   1    0.41    0.07
 -15  -9   1    0.41    0.04
  15   9   1    0.46    0.08
  17  -9   1    0.03    0.04
 -17   9   1    0.13    0.05
  17  -9   1    0.05    0.05
 -17   9   1   -0.01    0.03
 -17  -9  -1    0.12    0.06
  17   9  -1    0.05    0.05
  17   9  -1    0.06    0.05
  17  -9  -1    0.12    0.05
  17  -9  -1   -0.01    0.04
 -17   9  -1    0.04    0.05
 -17  -9   1    0.06    0.05
 -17   9  -1    0.04    0.04
  17   9   1    0.04    0.05
  17   9   1    0.15    0.05
 -17  -9   1    0.04    0.03
  17   9   1    0.02    0.03
 -19  -9  -1    1.06    0.12
 -19   9   1    1.02    0.08
 -19   9   1    1.12    0.12
  19   9  -1    1.09    0.11
  19  -9   1    1.00    0.12
  19  -9   1    0.95    0.10
  19   9  -1    1.16    0.14
  19  -9  -1    1.09    0.13
 -19   9  -1    0.99    0.09
  19   9   1    1.03    0.11
 -19  -9   1    1.01    0.12
 -19   9  -1    1.03    0.11
  19   9   1    1.06    0.07
  19  -9  -1    1.20    0.12
  19   9   1    1.19    0.13
  21  -9   1    0.10    0.05
  21   9  -1    0.24    0.07
  21  -9   1    0.30    0.08
  21   9  -1    0.23    0.08
 -21  -9  -1    0.11    0.07
 -21   9   1    0.23    0.07
  21   9   1    0.35    0.09
 -21  -9   1    0.24    0.07
  21  -9  -1    0.34    0.07
  21  -9  -1    0.14    0.07
 -21   9  -1    0.18    0.07
  21   9   1    0.22    0.07
 -21   9  -1    0.20    0.05
  23   9  -1    1.94    0.15
  23   9  -1    1.85    0.17
  23  -9   1    2.10    0.17
 -23   9   1    2.00    0.16
 -23  -9  -1    1.96    0.16
  23  -9   1    1.68    0.14
  23   9   1    2.02    0.16
  23  -9  -1    1.77    0.14
 -23  -9   1    1.69    0.16
  23   9   1    1.72    0.17
  23  -9  -1    1.48    0.16
 -23   9  -1    1.94    0.16
  25  -9   1    0.20    0.08
 -25   9   1    0.13    0.07
  25  -9   1    0.20    0.07
  25   9  -1    0.23    0.09
 -25  -9  -1    0.17    0.08
  25   9  -1    0.18    0.08
  25   9   1    0.19    0.09
 -25  -9   1    0.14    0.08
 -25   9  -1    0.25    0.08
  25   9   1    0.09    0.07
  25  -9  -1    0.12    0.08
  25  -9  -1    0.25    0.08
  27  -9   1    3.12    0.20
  27   9  -1    3.33    0.23
 -27   9   1    3.34    0.21
  27  -9   1    3.12    0.22
 -27  -9  -1    3.70    0.23
  27   9  -1    2.79    0.19
  27   9   1    3.29    0.23
  27  -9  -1    3.04    0.20
 -27   9  -1    2.92    0.21
 -27  -9   1    3.27    0.22
  27  -9  -1    2.89    0.21
  27   9   1    3.16    0.21
 -29  -9  -1    0.06    0.08
 -29   9   1    0.08    0.08
  29  -9   1    0.08    0.08
  29   9  -1    0.06    0.09
  29   9  -1    0.07    0.07
  29   9   1    0.21    0.08
 -29  -9   1    0.07    0.08
  29  -9  -1    0.08    0.08
 -29   9  -1    0.04    0.08
  29   9   1    0.17    0.10
 -31   9   1    0.68    0.13
  31   9  -1    0.69    0.15
 -31  -9  -1    0.36    0.11
  31  -9   1    0.65    0.14
 -31   9  -1    0.85    0.14
  31  -9  -1    0.75    0.14
 -31  -9   1    0.56    0.13
  31   9   1    0.63    0.14
  31   9   1    0.74    0.13
 -33  -9  -1    0.30    0.12
 -33   9   1    0.15    0.11
  33   9  -1    0.12    0.09
  33  -9   1    0.43    0.12
 -33   9  -1    0.36    0.11
  33   9   1    0.29    0.12
  33  -9  -1    0.38    0.12
 -33  -9   1    0.30    0.12
  35  -9   1    1.70    0.22
  35   9  -1    1.80    0.23
 -35   9   1    1.98    0.22
 -35  -9  -1    1.86    0.22
 -35   9  -1    1.98    0.22
  35  -9  -1    1.64    0.21
  35   9   1    1.78    0.23
 -35  -9   1    1.56    0.21
 -37  -9  -1    0.14    0.11
  37  -9   1   -0.10    0.09
 -37   9   1    0.12    0.11
  37   9  -1    0.27    0.12
  37  -9  -1    0.22    0.11
 -37   9  -1    0.17    0.11
 -37  -9   1    0.15    0.12
  37   9   1    0.42    0.14
 -39   9   1    1.32    0.20
  39   9  -1    0.81    0.18
  39  -9   1    0.98    0.19
 -39  -9   1    0.92    0.19
  39  -9  -1    1.00    0.19
  39   9   1    0.79    0.18
 -39   9  -1    1.35    0.20
  41  -9   1    0.08    0.11
  41   9  -1   -0.08    0.09
 -41  -9   1    0.01    0.12
  41   9   1    0.07    0.12
  41  -9  -1   -0.06    0.10
   1  11  -1    0.61    0.05
  -1 -11  -1    0.73    0.07
   1 -11   1    0.64    0.07
   1 -11   1    0.69    0.06
  -1 -11  -1    0.60    0.07
  -1  11   1    0.72    0.06
  -1  11   1    0.45    0.07
   1  11  -1    0.42    0.07
  -1  11  -1    0.60    0.09
  -1 -11   1    0.67    0.06
  -1 -11   1    0.55    0.07
  -1  11  -1    0.68    0.06
   1 -11  -1    0.57    0.06
   1 -11  -1    0.44    0.06
   1  11   1    0.71    0.08
   1  11   1    0.62    0.06
   3 -11   1    1.32    0.10
   3  11  -1    1.48    0.09
  -3 -11  -1    1.24    0.09
   3  11  -1    1.24    0.07
  -3 -11  -1    1.46    0.09
   3 -11   1    1.37    0.07
  -3  11   1    1.27    0.10
  -3  11   1    1.44    0.09
   3  11  -1    1.16    0.10
   3 -11  -1    1.32    0.09
   3 -11  -1    1.34    0.08
  -3  11  -1    1.45    0.10
  -3 -11   1    1.30    0.09
   3  11   1    1.22    0.07
   3  11   1    1.29    0.10
  -3  11  -1    1.57    0.09
   5 -11   1    5.79    0.17
  -5  11   1    5.92    0.20
   5  11  -1    6.18    0.20
   5  11  -1    5.93    0.15
  -5  11   1    6.23    0.21
  -5 -11  -1    6.02    0.20
  -5  11  -1    5.95    0.20
   5  11   1    6.18    0.16
   5 -11  -1    5.82    0.18
   5  11   1    6.22    0.20
  -5  11  -1    6.33    0.21
   5  11   1    5.84    0.22
  -5 -11   1    6.09    0.20
   5 -11  -1    5.81    0.20
  -7  11   1    0.35    0.06
   7 -11   1    0.50    0.04
   7 -11   1    0.53    0.07
   7  11  -1    0.44    0.07
  -7 -11  -1    0.55    0.07
  -7  11   1    0.40    0.06
   7  11  -1    0.35    0.06
  -7  11  -1    0.56    0.07
   7 -11  -1    0.46    0.05
  -7  11  -1    0.48    0.07
   7 -11  -1    0.52    0.07
  -7 -11   1    0.29    0.06
   7  11   1    0.44    0.06
   7  11   1    0.55    0.08
   9  11  -1   -0.10    0.03
  -9  11   1   -0.06    0.03
   9 -11   1   -0.06    0.03
  -9  11   1   -0.05    0.03
   9 -11   1   -0.01    0.02
  -9 -11  -1   -0.10    0.03
   9  11  -1    0.00    0.04
   9  11   1   -0.07    0.04
  -9  11  -1   -0.07    0.03
  -9  11  -1   -0.09    0.03
   9  11   1    0.00    0.04
   9  11   1   -0.05    0.01
   9 -11  -1   -0.03    0.04
  -9 -11   1   -0.16    0.03
   9 -11  -1   -0.05    0.02
  11  11  -1    1.32    0.11
 -11  11   1    1.34    0.08
 -11 -11  -1    1.26    0.10
 -11  11   1    1.18    0.10
  11 -11   1    1.13    0.10
  11  11  -1    1.10    0.10
  11 -11   1    1.09    0.07
  11  11   1    1.27    0.10
 -11  11  -1    1.17    0.08
  11  11   1    1.26    0.05
 -11 -11   1    1.30    0.10
 -11  11  -1    1.32    0.10
  11 -11  -1    1.09    0.10
  11 -11  -1    1.14    0.07
  11  11   1    1.11    0.10
 -13  11   1    5.09    0.17
  13 -11   1    4.73    0.21
 -13 -11  -1    4.96    0.20
  13  11  -1    4.79    0.21
 -13  11   1    4.86    0.20
  13 -11   1    4.79    0.17
  13  11  -1    4.92    0.21
  13  11   1    4.93    0.21
  13  11   1    4.66    0.21
  13  11   1    4.82    0.13
  13 -11  -1    4.87    0.17
 -13 -11   1    5.15    0.21
 -13  11  -1    4.89    0.18
 -13  11  -1    4.66    0.20
  13 -11  -1    4.82    0.21
  15  11  -1    0.53    0.09
 -15 -11  -1    0.59    0.08
  15  11  -1    0.59    0.09
 -15  11   1    0.58    0.06
 -15  11   1    0.47    0.08
  15 -11   1    0.40    0.08
  15 -11   1    0.53    0.07
  15 -11  -1    0.59    0.07
 -15  11  -1    0.43    0.08
  15  11   1    0.33    0.07
  15 -11  -1    0.42    0.08
  15  11   1    0.61    0.04
  15  11   1    0.51    0.08
 -15 -11   1    0.48    0.08
 -15  11  -1    0.47    0.06
 -17 -11  -1    0.86    0.10
 -17  11   1    0.61    0.09
  17  11  -1    0.59    0.10
  17  11  -1    0.66    0.10
  17 -11   1    0.71    0.08
 -17  11   1    0.70    0.07
  17 -11   1    0.62    0.10
 -17  11  -1    0.68    0.08
 -17  11  -1    0.99    0.11
  17 -11  -1    0.71    0.10
  17 -11  -1    0.71    0.08
 -17 -11   1    0.76    0.10
  17  11   1    0.83    0.11
  17  11   1    0.82    0.11
 -19  11   1    1.65    0.10
  19 -11   1    1.58    0.11
  19  11  -1    2.01    0.14
  19 -11   1    1.98    0.15
 -19 -11  -1    1.79    0.14
 -19  11   1    1.67    0.14
  19  11  -1    1.64    0.15
  19  11   1    1.90    0.15
 -19 -11   1    1.68    0.14
  19 -11  -1    1.70    0.12
  19 -11  -1    1.84    0.15
 -19  11  -1    1.96    0.15
 -19  11  -1    1.77    0.11
  19  11   1    2.06    0.15
  21  11  -1    0.34    0.09
 -21  11   1    0.43    0.09
 -21 -11  -1    0.29    0.08
  21  11  -1    0.35    0.09
  21 -11   1    0.44    0.08
  21 -11   1    0.32    0.08
 -21  11  -1    0.29    0.08
  21 -11  -1    0.46    0.08
  21  11   1    0.34    0.08
 -21 -11   1    0.24    0.08
 -21  11  -1    0.34    0.06
  21 -11  -1    0.20    0.08
  21  11   1    0.32    0.09
  23  11  -1    8.85    0.38
  23  11  -1    9.08    0.35
  23 -11   1    8.66    0.32
 -23  11   1    9.26    0.35
 -23 -11  -1   10.13    0.36
  23 -11   1    9.00    0.36
  23  11   1    9.75    0.36
  23 -11  -1    8.44    0.32
 -23 -11   1    8.98    0.35
  23 -11  -1    9.95    0.37
  23  11   1    8.61    0.37
 -23  11  -1    9.12    0.35
 -25  11   1    2.38    0.19
  25  11  -1    2.42    0.20
  25  11  -1    2.50    0.18
  25 -11   1    2.75    0.20
 -25 -11  -1    2.46    0.19
 -25 -11   1    2.54    0.19
  25  11   1    2.51    0.19
  25 -11  -1    2.28    0.17
 -25  11  -1    2.61    0.19
  25 -11  -1    2.37    0.19
  25  11   1    2.65    0.21
  27 -11   1    3.34    0.23
 -27 -11  -1    3.31    0.22
 -27  11   1    3.19    0.22
  27  11  -1    3.52    0.22
  27  11  -1    3.32    0.24
  27 -11  -1    3.56    0.24
 -27  11  -1    3.41    0.22
 -27 -11   1    4.02    0.24
  27  11   1    3.08    0.21
  27  11   1    2.77    0.23
 -29 -11  -1   -0.08    0.07
  29  11  -1    0.05    0.09
  29 -11   1    0.04    0.08
 -29  11   1    0.17    0.09
  29  11  -1    0.06    0.08
  29 -11  -1   -0.02    0.07
  29  11   1    0.13    0.08
  29  11   1    0.09    0.09
 -29  11  -1   -0.02    0.07
 -29 -11   1   -0.02    0.08
  31  11  -1    0.20    0.11
  31 -11   1    0.33    0.11
 -31 -11  -1    0.32    0.12
 -31  11   1    0.35    0.11
  31  11  -1    0.15    0.08
  31  11   1    0.20    0.09
 -31 -11   1    0.36    0.12
 -31  11  -1    0.29    0.10
  31  11   1    0.27    0.11
  31 -11  -1    0.29    0.11
  33 -11   1    0.11    0.10
  33  11  -1    0.27    0.12
 -33  11   1    0.20    0.11
 -33 -11  -1    0.24    0.12
 -33  11  -1    0.27    0.12
  33 -11  -1    0.24    0.11
 -33 -11   1    0.31    0.12
  33  11   1    0.15    0.11
  35 -11   1    1.43    0.21
  35  11  -1    1.09    0.19
 -35  11   1    1.40    0.19
 -35 -11  -1    1.36    0.20
  35 -11  -1    1.11    0.18
 -35  11  -1    1.06    0.18
 -35 -11   1    1.07    0.19
  35  11   1    1.17    0.20
  37 -11   1    0.19    0.11
 -37 -11  -1    0.10    0.12
  37  11  -1    0.25    0.13
 -37  11   1    0.05    0.11
  37  11   1    0.02    0.11
 -37  11  -1    0.12    0.11
 -37 -11   1    0.18    0.12
  37 -11  -1    0.06    0.10
 -39  11   1    0.61    0.16
  39  11  -1    1.20    0.22
  39 -11   1    0.61    0.15
 -39  11  -1    0.94    0.18
 -39 -11   1    0.98    0.19
  39 -11  -1    1.26    0.21
  39  11   1    0.73    0.17
 -41  11   1    0.10    0.14
  41 -11   1   -0.06    0.09
  41  11  -1    0.01    0.10
  41  11   1   -0.07    0.11
 -41  11  -1    0.01    0.12
  41 -11  -1    0.14    0.13
   1  13  -1    1.29    0.08
   1  13  -1    1.46    0.11
   1 -13   1    1.41    0.10
   1 -13   1    1.47    0.08
  -1 -13  -1    1.30    0.09
  -1 -13  -1    1.56    0.10
  -1  13   1    1.49    0.11
  -1  13   1    1.40    0.09
  -1 -13   1    1.63    0.09
  -1  13  -1    1.37    0.08
  -1 -13   1    1.25    0.09
  -1  13  -1    1.51    0.11
   1 -13  -1    1.56    0.09
   1  13   1    1.41    0.10
   1  13   1    1.28    0.08
   1 -13  -1    1.43    0.10
  -3  13   1    0.75    0.07
   3 -13   1    0.77    0.06
   3  13  -1    0.77    0.10
   3  13  -1    0.63    0.05
  -3  13   1    0.83    0.09
  -3 -13  -1    0.64    0.07
   3 -13   1    0.63    0.07
   3 -13  -1    0.70    0.08
  -3  13  -1    0.81    0.07
   3 -13  -1    0.72    0.06
  -3 -13   1    0.67    0.07
   3  13   1    0.74    0.06
  -3  13  -1    0.63    0.09
   3  13   1    0.70    0.09
  -3 -13   1    0.66    0.08
  -5  13   1    0.35    0.07
   5  13  -1    0.34    0.07
   5  13  -1    0.31    0.04
   5  13  -1    0.25    0.05
  -5 -13  -1    0.29    0.06
   5 -13   1    0.27    0.06
  -5 -13  -1    0.32    0.06
   5 -13   1    0.39    0.05
  -5  13   1    0.19    0.05
   5  13   1    0.34    0.04
   5 -13  -1    0.36    0.05
  -5  13  -1    0.46    0.08
   5 -13  -1    0.31    0.06
   5  13   1    0.19    0.06
  -5  13  -1    0.24    0.05
  -5 -13   1    0.31    0.06
   7  13  -1    1.25    0.10
  -7 -13  -1    1.25    0.10
   7 -13   1    1.27    0.10
   7  13  -1    1.45    0.12
   7  13  -1    1.25    0.05
   7 -13   1    1.28    0.07
  -7  13   1    1.29    0.10
  -7  13   1    1.32    0.10
   7 -13  -1    1.47    0.11
  -7 -13   1    1.28    0.10
   7 -13  -1    1.26    0.08
  -7  13  -1    1.17    0.10
   7  13   1    1.26    0.06
   7  13   1    1.24    0.10
  -7  13  -1    1.36    0.10
   7  13   1    1.36    0.11
  -9  13   1    0.09    0.04
   9  13  -1   -0.02    0.04
  -9 -13  -1    0.07    0.04
  -9  13   1    0.11    0.04
   9 -13   1    0.09    0.05
   9 -13   1    0.07    0.03
   9  13  -1    0.11    0.05
  -9  13  -1    0.10    0.04
   9 -13  -1    0.10    0.03
  -9 -13   1    0.05    0.05
   9  13   1   -0.01    0.04
  -9  13  -1    0.01    0.04
   9  13   1    0.02    0.05
   9  13   1    0.03    0.02
   9 -13  -1    0.07    0.05
  11 -13   1    1.92    0.13
 -11  13   1    1.63    0.12
  11  13  -1    1.83    0.13
 -11  13   1    1.47    0.10
  11  13  -1    1.90    0.13
  11 -13   1    1.71    0.08
  11 -13  -1    1.74    0.12
 -11  13  -1    1.52    0.10
  11 -13  -1    1.55    0.09
  11  13   1    1.65    0.12
  11  13   1    1.60    0.12
 -11  13  -1    1.76    0.12
 -13 -13  -1   -0.02    0.04
  13  13  -1   -0.01    0.04
  13 -13   1   -0.03    0.02
  13  13  -1   -0.01    0.04
 -13  13   1   -0.07    0.04
  13 -13   1   -0.05    0.04
 -13  13   1   -0.06    0.03
 -13  13  -1   -0.10    0.03
 -13  13  -1    0.02    0.04
  13  13   1   -0.01    0.05
  13  13   1   -0.05    0.04
  13 -13  -1   -0.03    0.05
 -13 -13   1   -0.04    0.04
  13 -13  -1   -0.03    0.03
 -15 -13  -1    0.66    0.09
 -15  13   1    0.49    0.09
  15  13  -1    0.54    0.09
  15 -13   1    0.56    0.09
  15 -13   1    0.64    0.07
 -15  13   1    0.59    0.07
  15  13  -1    0.47    0.09
 -15  13  -1    0.39    0.07
  15  13   1    0.54    0.09
  15 -13  -1    0.66    0.08
 -15  13  -1    0.63    0.07
 -15 -13   1    0.61    0.09
  15  13   1    0.56    0.09
  15 -13  -1    0.70    0.10
 -17  13   1   -0.01    0.05
  17 -13   1    0.06    0.06
  17 -13   1   -0.01    0.03
  17  13  -1    0.03    0.05
  17  13  -1    0.14    0.06
 -17 -13  -1    0.04    0.05
 -17  13   1    0.04    0.04
  17 -13  -1    0.04    0.05
 -17 -13   1    0.02    0.05
 -17  13  -1    0.09    0.05
 -17  13  -1    0.01    0.05
  17  13   1    0.04    0.06
  17 -13  -1    0.03    0.03
  17  13   1    0.09    0.06
  19  13  -1    0.72    0.11
 -19  13   1    0.53    0.10
 -19 -13  -1    0.60    0.10
  19 -13   1    0.52    0.10
  19  13  -1    0.74    0.12
  19 -13   1    0.83    0.09
  19  13   1    0.85    0.12
 -19 -13   1    0.86    0.11
 -19  13  -1    0.70    0.11
  19 -13  -1    0.69    0.11
 -19  13  -1    0.93    0.09
  19  13   1    0.82    0.11
  19 -13  -1    0.65    0.09
  21  13  -1    0.67    0.11
 -21 -13  -1    0.57    0.10
 -21  13   1    0.55    0.10
  21  13  -1    0.90    0.13
  21 -13   1    0.77    0.12
  21  13   1    0.72    0.12
  21 -13  -1    0.86    0.12
 -21  13  -1    0.62    0.11
  21 -13  -1    0.71    0.10
 -21 -13   1    0.60    0.10
  21  13   1    0.83    0.12
 -23  13   1    1.99    0.17
  23  13  -1    1.84    0.16
  23 -13   1    2.34    0.18
  23  13  -1    1.69    0.18
 -23 -13  -1    1.95    0.17
 -23  13  -1    1.96    0.17
 -23 -13   1    2.06    0.18
  23 -13  -1    1.77    0.18
  23  13   1    2.23    0.19
  25 -13   1    0.55    0.11
 -25  13   1    0.68    0.12
  25  13  -1    0.50    0.10
 -25 -13  -1    0.73    0.12
  25  13  -1    0.39    0.11
  25 -13  -1    0.61    0.12
  25  13   1    0.68    0.13
 -25 -13   1    0.56    0.12
 -25  13  -1    0.49    0.11
  25  13   1    0.59    0.11
 -27 -13  -1    0.81    0.14
  27  13  -1    0.38    0.12
  27 -13   1    0.47    0.12
 -27  13   1    0.53    0.12
  27  13  -1    0.39    0.10
  27  13   1    0.46    0.11
 -27  13  -1    0.39    0.11
  27 -13  -1    0.40    0.11
  27  13   1    0.46    0.12
 -27 -13   1    0.46    0.11
  29 -13   1    0.89    0.15
 -29  13   1    0.69    0.14
 -29 -13  -1    0.54    0.12
  29  13  -1    0.59    0.13
  29  13  -1    0.45    0.13
  29 -13  -1    0.79    0.15
  29  13   1    0.44    0.11
 -29 -13   1    0.48    0.12
 -29  13  -1    0.30    0.11
  29  13   1    0.45    0.12
 -31 -13  -1    0.76    0.15
 -31  13   1    0.93    0.16
  31 -13   1    0.80    0.15
  31  13  -1    0.52    0.13
  31  13  -1    0.68    0.14
  31 -13  -1    0.63    0.13
  31  13   1    0.44    0.13
 -31 -13   1    0.78    0.15
 -31  13  -1    0.64    0.13
  31  13   1    0.58    0.13
 -33 -13  -1    0.23    0.12
  33  13  -1    0.34    0.13
  33 -13   1    0.14    0.10
 -33  13   1    0.28    0.12
 -33  13  -1    0.17    0.11
  33  13   1    0.31    0.13
  33  13   1    0.31    0.13
 -33 -13   1    0.34    0.13
  33 -13  -1    0.19    0.11
  35  13  -1    1.23    0.20
 -35  13   1    1.25    0.19
  35 -13   1    1.12    0.19
 -35 -13  -1    0.71    0.16
  35  13   1    0.60    0.16
 -35  13  -1    1.08    0.18
  35 -13  -1    1.15    0.19
 -35 -13   1    1.00    0.18
 -37  13   1    0.31    0.14
  37 -13   1    0.43    0.14
  37  13  -1    0.39    0.15
 -37 -13   1    0.37    0.15
  37 -13  -1    0.11    0.12
  37  13   1    0.53    0.16
 -37  13  -1    0.59    0.16
 -39  13   1    0.52    0.16
  39 -13   1    0.54    0.15
  39  13  -1    0.57    0.17
  39 -13  -1    0.43    0.14
  39  13   1    0.65    0.17
 -39  13  -1    0.76    0.17
  -1  15   1    0.68    0.09
   1  15  -1    0.93    0.11
   1 -15   1    0.76    0.09
   1 -15   1    0.79    0.07
  -1 -15  -1    0.55    0.08
  -1 -15  -1    0.79    0.08
  -1  15   1    0.81    0.08
   1  15  -1    0.65    0.06
  -1  15  -1    0.78    0.07
  -1  15  -1    0.77    0.10
  -1 -15   1    0.78    0.08
   1 -15  -1    0.79    0.09
   1  15   1    0.68    0.10
   1  15   1    0.79    0.07
  -1 -15   1    0.99    0.09
   1 -15  -1    0.75    0.07
  -3 -15  -1    1.06    0.09
  -3  15   1    1.22    0.09
   3  15  -1    1.20    0.11
   3 -15   1    1.19    0.08
   3  15  -1    1.04    0.07
  -3 -15  -1    1.01    0.09
   3 -15   1    1.17    0.10
  -3  15   1    1.08    0.10
  -3  15  -1    1.27    0.09
   3  15   1    1.19    0.12
  -3 -15   1    1.15    0.10
   3 -15  -1    1.26    0.08
   3  15   1    0.95    0.07
  -3  15  -1    1.27    0.11
  -3 -15   1    1.16    0.09
   3 -15  -1    1.25    0.10
   5 -15   1    6.91    0.20
  -5  15   1    6.69    0.25
   5  15  -1    6.65    0.23
  -5  15   1    6.66    0.23
   5  15  -1    6.69    0.19
  -5 -15  -1    6.45    0.24
  -5 -15  -1    6.65    0.23
   5  15  -1    6.10    0.26
   5 -15   1    6.47    0.24
  -5  15  -1    7.07    0.23
   5 -15  -1    6.59    0.21
   5  15   1    6.53    0.26
  -5  15  -1    6.85    0.26
   5  15   1    6.77    0.19
  -5 -15   1    6.69    0.24
   5 -15  -1    6.30    0.24
   7  15  -1    0.62    0.09
  -7 -15  -1    0.84    0.10
   7 -15   1    0.73    0.09
  -7  15   1    0.73    0.09
   7  15  -1    0.71    0.04
   7  15  -1    0.82    0.09
  -7 -15  -1    0.72    0.09
  -7  15   1    0.80    0.09
   7 -15   1    0.82    0.06
   7 -15  -1    0.68    0.09
   7  15   1    0.81    0.10
   7 -15  -1    0.70    0.06
  -7  15  -1    0.74    0.09
  -7 -15   1    0.87    0.09
   7  15   1    0.64    0.08
  -7  15  -1    0.89    0.09
   7  15   1    0.72    0.05
  -9  15   1    1.05    0.10
   9  15  -1    1.06    0.12
   9  15  -1    1.04    0.11
   9 -15   1    1.03    0.07
  -9 -15  -1    1.06    0.10
  -9  15   1    0.94    0.10
   9 -15   1    1.21    0.11
  -9  15  -1    0.99    0.09
   9 -15  -1    1.08    0.07
   9  15   1    1.02    0.05
   9  15   1    1.10    0.11
   9 -15  -1    1.06    0.11
  -9  15  -1    1.18    0.10
   9  15   1    1.32    0.13
  -9 -15   1    0.99    0.10
  11  15  -1    0.38    0.08
  11 -15   1    0.31    0.04
 -11 -15  -1    0.33    0.07
  11  15  -1    0.35    0.08
 -11  15   1    0.32    0.07
  11 -15   1    0.34    0.07
 -11  15   1    0.26    0.06
 -11  15  -1    0.38    0.08
  11  15   1    0.42    0.09
 -11 -15   1    0.22    0.06
 -11  15  -1    0.28    0.06
  11 -15  -1    0.32    0.07
  11  15   1    0.23    0.07
  11 -15  -1    0.30    0.05
 -13  15   1    0.37    0.07
 -13 -15  -1    0.34    0.07
  13  15  -1    0.32    0.08
 -13  15   1    0.31    0.07
  13  15  -1    0.45    0.08
  13 -15   1    0.23    0.06
  13 -15   1    0.40    0.05
  13  15   1    0.49    0.09
 -13  15  -1    0.36    0.07
  13 -15  -1    0.47    0.09
  13  15   1    0.40    0.08
 -13  15  -1    0.33    0.06
 -13 -15   1    0.33    0.07
  13 -15  -1    0.45    0.06
 -15 -15  -1    0.87    0.11
  15  15  -1    1.07    0.13
 -15  15   1    1.04    0.09
  15  15  -1    1.20    0.13
  15 -15   1    1.46    0.14
 -15  15   1    1.10    0.12
  15 -15   1    1.04    0.08
  15 -15  -1    1.13    0.09
  15  15   1    1.07    0.13
 -15 -15   1    1.08    0.12
 -15  15  -1    0.94    0.11
 -15  15  -1    1.00    0.10
  15  15   1    1.14    0.14
  15 -15  -1    1.09    0.12
 -17 -15  -1    0.87    0.11
 -17  15   1    0.87    0.09
  17  15  -1    0.52    0.10
 -17  15   1    0.71    0.10
  17 -15   1    0.68    0.11
  17  15  -1    0.88    0.12
 -17  15  -1    0.92    0.10
  17  15   1    0.77    0.12
  17  15   1    0.90    0.12
  17 -15  -1    0.83    0.09
 -17  15  -1    0.53    0.09
 -17 -15   1    0.77    0.11
  17 -15  -1    0.50    0.10
 -19  15   1    2.41    0.17
  19  15  -1    2.28    0.17
  19  15  -1    2.06    0.18
  19 -15   1    2.27    0.17
 -19 -15  -1    2.34    0.16
  19  15   1    2.43    0.19
  19  15   1    2.24    0.17
 -19 -15   1    2.33    0.17
 -19  15  -1    2.34    0.14
  19 -15  -1    2.24    0.15
 -19  15  -1    2.05    0.16
  19 -15  -1    2.46    0.18
 -21 -15  -1    0.23    0.08
  21 -15   1    0.23    0.09
  21  15  -1    0.26    0.09
  21  15  -1    0.40    0.09
 -21  15   1    0.24    0.08
 -21 -15   1    0.26    0.09
  21  15   1    0.11    0.08
 -21  15  -1    0.21    0.08
  21  15   1    0.11    0.08
  21 -15  -1    0.25    0.09
 -23 -15  -1    1.74    0.17
  23  15  -1    1.34    0.16
 -23  15   1    1.80    0.18
  23 -15   1    1.83    0.19
  23  15  -1    1.30    0.17
 -23  15  -1    1.86    0.18
  23 -15  -1    1.97    0.19
  23  15   1    1.40    0.17
 -23 -15   1    1.68    0.17
  23  15   1    1.66    0.18
  25  15  -1    0.39    0.11
 -25 -15  -1    0.49    0.11
 -25  15   1    0.34    0.10
  25 -15   1    0.39    0.10
  25  15  -1    0.44    0.10
  25 -15  -1    0.42    0.11
 -25 -15   1    0.45    0.11
  25  15   1    0.30    0.10
 -25  15  -1    0.28    0.09
  25  15   1    0.48    0.12
  27  15  -1    0.19    0.10
 -27 -15  -1    0.32    0.11
  27  15  -1    0.23    0.09
 -27  15   1    0.17    0.09
  27 -15   1    0.20    0.10
  27  15   1    0.29    0.10
  27  15   1    0.24    0.11
  27 -15  -1    0.38    0.11
 -27  15  -1    0.36    0.11
 -27 -15   1    0.37    0.11
  29  15  -1    0.00    0.07
 -29 -15  -1    0.09    0.09
  29 -15   1   -0.02    0.08
 -29  15   1    0.05    0.09
  29  15  -1    0.13    0.09
  29 -15  -1    0.00    0.08
 -29  15  -1   -0.03    0.08
 -29 -15   1    0.04    0.09
  29  15   1    0.03    0.08
  29  15   1    0.03    0.09
  31  15  -1    0.12    0.11
 -31  15   1    0.43    0.12
  31 -15   1    0.13    0.09
  31  15  -1    0.27    0.10
 -31 -15  -1    0.10    0.10
 -31 -15   1    0.16    0.11
 -31  15  -1    0.26    0.11
  31  15   1    0.05    0.09
  31 -15  -1    0.15    0.09
  31  15   1    0.31    0.11
 -33 -15  -1   -0.14    0.09
  33 -15   1    0.05    0.09
  33  15  -1    0.02    0.10
 -33  15   1    0.16    0.11
 -33 -15   1    0.06    0.11
 -33  15  -1   -0.04    0.10
  33  15   1   -0.08    0.09
  33 -15  -1   -0.10    0.08
  33  15   1    0.13    0.10
  35 -15   1    3.01    0.27
 -35  15   1    2.71    0.27
  35  15  -1    2.46    0.29
  35 -15  -1    2.95    0.29
  35  15   1    2.64    0.29
 -35 -15   1    2.74    0.28
 -35  15  -1    3.08    0.27
  37  15  -1    0.79    0.18
  37 -15   1    0.94    0.18
 -37  15   1    0.50    0.16
  37  15   1    1.20    0.22
 -37  15  -1    0.71    0.17
  37 -15  -1    0.82    0.17
  39 -15   1    0.18    0.14
 -39  15   1    0.22    0.14
  39  15  -1    0.21    0.14
 -39  15  -1    0.08    0.14
  39  15   1    0.29    0.14
  39 -15  -1    0.12    0.10
   1 -17   1    0.36    0.07
  -1 -17  -1    0.32    0.06
  -1  17   1    0.40    0.08
   1  17  -1    0.43    0.08
   1  17  -1    0.37    0.05
  -1 -17  -1    0.33    0.06
  -1  17   1    0.35    0.06
   1 -17   1    0.32    0.06
   1 -17  -1    0.27    0.06
   1 -17  -1    0.31    0.06
  -1  17  -1    0.42    0.09
  -1 -17   1    0.42    0.07
   1  17   1    0.45    0.09
  -1  17  -1    0.38    0.06
   1  17   1    0.38    0.06
  -1 -17   1    0.42    0.08
  -3 -17  -1    0.05    0.05
   3  17  -1    0.20    0.06
   3  17  -1    0.06    0.03
  -3  17   1    0.09    0.04
   3 -17   1    0.05    0.05
  -3 -17  -1    0.08    0.04
  -3  17   1    0.08    0.05
   3 -17   1    0.13    0.04
  -3 -17   1    0.13    0.05
   3 -17  -1    0.14    0.05
  -3 -17   1    0.04    0.04
   3 -17  -1    0.05    0.04
  -3  17  -1    0.09    0.04
   3  17   1    0.12    0.05
  -3  17  -1    0.06    0.05
   3  17   1    0.03    0.03
  -5 -17  -1   -0.03    0.04
   5  17  -1    0.02    0.02
  -5  17   1   -0.01    0.03
   5  17  -1   -0.01    0.05
  -5 -17  -1    0.02    0.04
   5 -17   1   -0.01    0.02
   5 -17   1    0.04    0.05
  -5  17   1    0.03    0.04
   5 -17  -1   -0.03    0.04
   5  17   1   -0.05    0.04
   5  17   1    0.03    0.03
   5 -17  -1   -0.01    0.03
  -5 -17   1   -0.04    0.04
  -5  17  -1    0.04    0.03
  -5 -17   1    0.02    0.04
  -5  17  -1   -0.02    0.04
   7  17  -1   -0.02    0.02
   7  17  -1   -0.02    0.05
   7 -17   1    0.03    0.05
   7 -17   1   -0.01    0.03
  -7  17   1    0.02    0.04
   7  17  -1    0.05    0.05
  -7 -17  -1    0.04    0.05
  -7  17   1    0.09    0.06
  -7 -17  -1    0.00    0.04
   7  17   1    0.02    0.02
   7 -17  -1    0.05    0.05
  -7  17  -1    0.01    0.04
   7 -17  -1    0.04    0.03
  -7 -17   1   -0.01    0.04
  -7  17  -1    0.02    0.05
   7  17   1   -0.06    0.04
   9 -17   1    0.12    0.06
  -9 -17  -1    0.13    0.06
   9 -17   1    0.10    0.03
   9  17  -1   -0.02    0.05
  -9  17   1    0.03    0.05
   9  17  -1   -0.04    0.04
  -9 -17  -1    0.03    0.05
  -9  17   1   -0.04    0.05
  -9  17  -1    0.06    0.05
   9  17   1   -0.01    0.05
   9 -17  -1    0.07    0.03
   9  17   1    0.01    0.05
   9 -17  -1    0.09    0.05
   9  17   1    0.00    0.02
  -9 -17   1    0.02    0.05
  -9  17  -1    0.00    0.04
 -11  17   1    0.45    0.08
 -11 -17  -1    0.45    0.08
  11  17  -1    0.29    0.08
  11 -17   1    0.41    0.05
  11 -17   1    0.35    0.08
  11  17  -1    0.33    0.07
 -11  17   1    0.31    0.07
 -11  17  -1    0.58    0.09
 -11  17  -1    0.40    0.08
  11 -17  -1    0.25    0.07
 -11 -17   1    0.40    0.08
  11  17   1    0.27    0.07
  11 -17  -1    0.35    0.05
  11  17   1    0.26    0.08
  13 -17   1    0.01    0.03
  13 -17   1    0.03    0.05
 -13  17   1   -0.04    0.04
 -13 -17  -1   -0.04    0.04
  13  17  -1   -0.03    0.05
  13  17  -1    0.02    0.05
 -13  17   1    0.00    0.05
 -13  17  -1    0.07    0.05
 -13 -17   1   -0.01    0.05
  13  17   1   -0.01    0.05
  13 -17  -1    0.02    0.03
  13 -17  -1    0.01    0.05
  13  17   1    0.00    0.05
 -13  17  -1    0.03    0.05
 -15  17   1    0.40    0.08
  15  17  -1    0.48    0.10
  15 -17   1    0.33    0.08
  15  17  -1    0.33    0.08
 -15  17   1    0.32    0.08
 -15 -17  -1    0.28    0.08
 -15 -17   1    0.43    0.09
  15  17   1    0.35    0.09
 -15  17  -1    0.35    0.08
 -15  17  -1    0.45    0.09
  15  17   1    0.35    0.08
  15 -17  -1    0.50    0.07
  15 -17  -1    0.29    0.08
  17  17  -1    0.53    0.10
  17 -17   1    0.65    0.11
 -17 -17  -1    0.56    0.10
 -17  17   1    0.64    0.09
  17  17  -1    0.51    0.10
 -17  17   1    0.56    0.10
 -17  17  -1    0.57    0.09
  17 -17  -1    0.51    0.10
 -17  17  -1    0.44    0.09
  17  17   1    0.70    0.12
  17  17   1    0.40    0.10
 -17 -17   1    0.48    0.10
  19  17  -1    2.06    0.18
 -19  17   1    1.82    0.16
  19  17  -1    1.74    0.18
  19 -17   1    1.70    0.17
  19  17   1    1.81    0.17
 -19  17  -1    1.90    0.16
  19 -17  -1    1.51    0.16
  19  17   1    1.69    0.18
  21  17  -1    0.01    0.07
 -21  17   1   -0.04    0.06
 -21 -17  -1    0.09    0.07
  21  17  -1    0.02    0.07
  21 -17   1    0.04    0.07
  21  17   1   -0.06    0.07
 -21  17  -1    0.02    0.06
  21 -17  -1    0.03    0.07
  21  17   1   -0.01    0.07
 -21 -17   1    0.12    0.08
  23  17  -1    1.35    0.17
 -23 -17  -1    1.46    0.16
 -23  17   1    1.58    0.17
  23  17  -1    1.53    0.19
  23 -17   1    1.48    0.17
 -23  17  -1    1.18    0.15
  23 -17  -1    1.50    0.18
  23  17   1    1.23    0.16
 -23 -17   1    1.36    0.16
  23  17   1    1.27    0.17
 -25  17   1    0.42    0.12
  25  17  -1    0.39    0.11
  25 -17   1    0.49    0.12
  25  17  -1    0.70    0.14
 -25 -17  -1    0.87    0.14
  25  17   1    0.61    0.13
  25 -17  -1    0.45    0.12
 -25  17  -1    0.56    0.11
  25  17   1    0.43    0.12
 -25 -17   1    0.61    0.13
 -27  17   1    1.46    0.18
  27 -17   1    1.52    0.19
  27  17  -1    1.71    0.21
 -27 -17  -1    1.72    0.19
  27  17  -1    1.79    0.20
 -27 -17   1    1.27    0.17
 -27  17  -1    1.55    0.18
  27 -17  -1    1.39    0.19
  27  17   1    1.59    0.19
  27  17   1    1.60    0.20
  29 -17   1    0.20    0.10
  29  17  -1    0.14    0.10
 -29 -17  -1    0.12    0.09
  29  17  -1    0.08    0.11
 -29  17   1    0.01    0.08
  29  17   1    0.17    0.10
 -29 -17   1   -0.04    0.09
  29  17   1   -0.08    0.08
 -29  17  -1   -0.15    0.07
  29 -17  -1   -0.03    0.07
  31  17  -1    1.28    0.20
 -31  17   1    2.03    0.23
  31 -17   1    1.67    0.21
  31  17  -1    1.30    0.19
 -31 -17  -1    1.65    0.20
  31  17   1    1.70    0.23
 -31 -17   1    1.96    0.22
 -31  17  -1    1.59    0.20
  31  17   1    1.69    0.22
  31 -17  -1    1.40    0.20
  33  17  -1    0.16    0.10
 -33  17   1    0.14    0.11
  33  17  -1   -0.06    0.10
  33 -17   1    0.10    0.10
 -33 -17   1   -0.02    0.11
 -33  17  -1    0.33    0.12
  33 -17  -1    0.07    0.10
  33  17   1    0.07    0.09
  33  17   1   -0.07    0.10
  35  17  -1    0.79    0.19
 -35  17   1    0.55    0.16
  35 -17   1    1.18    0.20
 -35  17  -1    0.80    0.17
  35 -17  -1    0.92    0.18
  35  17   1    0.61    0.17
 -35 -17   1    1.00    0.19
 -37  17   1   -0.02    0.11
  37  17  -1    0.00    0.10
  37 -17   1   -0.14    0.08
  37 -17  -1    0.09    0.12
 -37  17  -1   -0.17    0.10
  37  17   1   -0.10    0.09
 -39  17   1    1.41    0.23
 -39  17  -1    1.05    0.21
  -1 -19  -1    0.26    0.06
   1  19  -1    0.25    0.05
   1  19  -1    0.18    0.07
   1 -19   1    0.17    0.06
  -1  19   1    0.30    0.06
   1 -19   1    0.21    0.05
  -1 -19  -1    0.20    0.06
  -1  19   1    0.31    0.08
   1 -19  -1    0.35    0.07
   1  19   1    0.25    0.06
  -1 -19   1    0.28    0.07
   1  19   1    0.32    0.08
  -1 -19   1    0.24    0.06
  -1  19  -1    0.23    0.05
   1 -19  -1    0.25    0.06
  -1  19  -1    0.16    0.07
  -3 -19  -1    0.12    0.05
  -3  19   1    0.14    0.05
   3 -19   1    0.09    0.06
  -3 -19  -1    0.10    0.05
   3  19  -1    0.16    0.06
  -3  19   1    0.02    0.05
   3  19  -1    0.13    0.04
   3 -19   1    0.20    0.05
  -3 -19   1    0.10    0.05
   3  19   1    0.11    0.04
  -3  19  -1    0.20    0.07
  -3  19  -1    0.11    0.05
   3  19   1    0.10    0.06
   3 -19  -1    0.12    0.06
   3 -19  -1    0.15    0.05
  -3 -19   1    0.17    0.06
   5 -19   1    0.19    0.06
   5 -19   1    0.23    0.05
   5  19  -1    0.29    0.08
  -5  19   1    0.32    0.07
  -5 -19  -1    0.23    0.06
   5  19  -1    0.29    0.05
  -5 -19  -1    0.25    0.07
  -5  19   1    0.13    0.06
   5 -19  -1    0.30    0.08
  -5  19  -1    0.26    0.06
   5  19   1    0.28    0.05
   5  19   1    0.32    0.09
  -5 -19   1    0.34    0.07
   5 -19  -1    0.31    0.06
  -5 -19   1    0.20    0.06
  -5  19  -1    0.38    0.09
  -7 -19  -1    0.47    0.08
   7 -19   1    0.43    0.05
   7 -19   1    0.54    0.09
  -7 -19  -1    0.35    0.08
  -7  19   1    0.41    0.08
   7  19  -1    0.43    0.09
  -7  19   1    0.31    0.07
   7  19   1    0.44    0.09
  -7 -19   1    0.43    0.08
  -7 -19   1    0.50    0.08
  -7  19  -1    0.50    0.09
  -7  19  -1    0.43    0.08
   7  19   1    0.43    0.05
   7 -19  -1    0.28    0.05
   7 -19  -1    0.46    0.08
  -9  19   1    0.33    0.07
   9  19  -1    0.48    0.09
  -9 -19  -1    0.28    0.07
   9 -19   1    0.51    0.06
   9  19  -1    0.36    0.07
  -9 -19  -1    0.42    0.09
  -9  19   1    0.32    0.08
   9 -19   1    0.44    0.09
   9 -19  -1    0.53    0.09
  -9  19  -1    0.30    0.07
  -9  19  -1    0.45    0.09
  -9 -19   1    0.42    0.08
   9 -19  -1    0.55    0.06
   9  19   1    0.38    0.09
 -11  19   1    0.60    0.10
  11  19  -1    0.58    0.11
 -11 -19  -1    0.62    0.10
  11  19  -1    0.55    0.09
 -11 -19  -1    0.60    0.10
 -11  19   1    0.52    0.09
  11 -19   1    0.61    0.10
  11 -19  -1    0.69    0.10
 -11  19  -1    0.67    0.11
 -11 -19   1    0.65    0.10
  11  19   1    0.64    0.12
  11 -19  -1    0.75    0.08
 -11  19  -1    0.53    0.09
  13  19  -1    0.27    0.08
 -13 -19  -1    0.19    0.07
 -13  19   1    0.08    0.06
 -13  19   1    0.26    0.07
  13  19  -1    0.35    0.08
  13 -19   1    0.25    0.08
  13  19   1    0.16    0.07
  13 -19  -1    0.30    0.08
 -13 -19   1    0.33    0.08
 -13  19  -1    0.14    0.07
  13  19   1    0.27    0.08
 -13  19  -1    0.19    0.07
 -15  19   1    0.80    0.11
  15  19  -1    1.09    0.15
 -15 -19  -1    0.90    0.12
  15 -19   1    1.12    0.14
  15  19  -1    0.97    0.13
 -15  19   1    0.99    0.13
  15 -19  -1    1.00    0.13
  15  19   1    0.89    0.13
  15  19   1    0.84    0.12
 -15  19  -1    0.79    0.11
 -15  19  -1    0.92    0.12
 -15 -19   1    1.03    0.13
  17  19  -1    5.62    0.28
 -17 -19  -1    5.58    0.26
 -17  19   1    5.52    0.27
  17 -19   1    5.39    0.27
  17  19  -1    5.19    0.28
  17 -19  -1    5.24    0.27
 -17  19  -1    5.89    0.27
 -17  19  -1    5.58    0.24
  17  19   1    5.17    0.28
  17  19   1    4.71    0.27
 -17 -19   1    5.53    0.26
  19 -19   1    5.82    0.29
  19  19  -1    6.08    0.31
 -19  19   1    6.50    0.30
 -19 -19  -1    6.20    0.28
  19  19  -1    5.59    0.30
 -19  19  -1    5.74    0.28
 -19 -19   1    6.53    0.30
  19  19   1    5.96    0.30
  19  19   1    6.41    0.31
  19 -19  -1    6.15    0.30
  21  19  -1    0.27    0.10
  21 -19   1    0.22    0.09
 -21  19   1    0.10    0.08
 -21 -19  -1    0.07    0.08
  21  19  -1    0.22    0.10
 -21 -19   1    0.24    0.09
 -21  19  -1    0.22    0.09
  21 -19  -1    0.26    0.09
  21  19   1    0.24    0.10
  21  19   1    0.31    0.11
  23  19  -1    0.27    0.11
 -23  19   1    0.34    0.11
  23  19  -1    0.14    0.09
 -23 -19  -1    0.22    0.09
  23 -19   1    0.26    0.10
  23 -19  -1    0.21    0.09
 -23  19  -1    0.20    0.09
  23  19   1    0.38    0.12
  23  19   1    0.24    0.10
 -23 -19   1    0.25    0.10
  25  19  -1    0.83    0.15
 -25  19   1    0.83    0.14
 -25 -19  -1    1.00    0.15
  25 -19   1    0.84    0.15
  25  19  -1    0.52    0.13
  25  19   1    0.83    0.14
 -25 -19   1    1.09    0.16
 -25  19  -1    0.93    0.15
  25 -19  -1    0.93    0.15
  25  19   1    0.77    0.15
  27 -19   1    0.80    0.15
 -27 -19  -1    0.69    0.14
  27  19  -1    0.61    0.13
  27  19  -1    0.43    0.13
 -27  19   1    0.77    0.14
 -27 -19   1    0.61    0.13
  27 -19  -1    0.69    0.14
  27  19   1    0.61    0.15
  27  19   1    0.75    0.15
 -27  19  -1    0.63    0.14
 -29  19   1    1.90    0.22
  29  19  -1    1.57    0.20
  29 -19   1    1.56    0.21
  29  19  -1    2.14    0.25
 -29 -19  -1    1.90    0.21
 -29  19  -1    1.71    0.21
  29 -19  -1    1.61    0.21
 -29 -19   1    2.20    0.23
  29  19   1    2.03    0.23
  29  19   1    1.71    0.23
  31  19  -1    0.61    0.15
  31 -19   1    0.80    0.16
 -31  19   1    0.55    0.15
  31  19  -1    0.81    0.17
  31 -19  -1    0.44    0.14
 -31  19  -1    0.60    0.15
  31  19   1    0.66    0.16
 -31 -19   1    1.02    0.17
  31  19   1    0.62    0.15
  33  19  -1    0.47    0.15
  33  19  -1    0.40    0.13
  33 -19   1    0.48    0.14
 -33  19   1    0.21    0.13
 -33  19  -1    0.28    0.12
  33  19   1    0.60    0.17
  33  19   1    0.24    0.12
  33 -19  -1    0.38    0.14
 -33 -19   1    0.49    0.14
  35  19  -1    1.15    0.21
 -35  19   1    0.96    0.19
  35 -19   1    1.08    0.20
  35 -19  -1    0.84    0.18
  35  19   1    1.81    0.26
 -35  19  -1    1.21    0.21
 -37  19   1    0.22    0.14
  37 -19   1    0.08    0.11
  37  19  -1    0.64    0.18
 -37  19  -1    0.14    0.15
  37 -19  -1    0.31    0.14
  37  19   1    0.29    0.14
   1 -21   1    0.06    0.05
  -1  21   1    0.07    0.06
  -1 -21  -1    0.02    0.05
  -1  21   1    0.06    0.05
   1 -21   1    0.10    0.05
   1  21  -1    0.10    0.07
  -1 -21  -1    0.10    0.06
   1  21  -1    0.02    0.04
   1  21   1    0.10    0.06
  -1  21  -1    0.11    0.05
   1 -21  -1    0.00    0.05
  -1 -21   1    0.04    0.06
   1 -21  -1    0.06    0.05
   1  21   1    0.01    0.04
  -1  21  -1    0.08    0.06
  -1 -21   1    0.09    0.05
   3  21  -1    0.05    0.06
   3  21  -1    0.16    0.05
   3 -21   1    0.14    0.06
   3 -21   1    0.24    0.05
  -3  21   1    0.18    0.07
  -3  21   1    0.16    0.06
  -3 -21  -1    0.18    0.06
  -3 -21  -1    0.11    0.05
  -3  21  -1    0.13    0.05
  -3 -21   1    0.14    0.06
   3 -21  -1    0.13    0.05
  -3  21  -1    0.18    0.07
   3  21   1    0.09    0.04
   3  21   1    0.14    0.06
   3 -21  -1    0.26    0.07
  -3 -21   1    0.20    0.06
   5 -21   1    0.64    0.07
  -5 -21  -1    0.60    0.09
  -5 -21  -1    0.58    0.10
  -5  21   1    0.49    0.09
  -5  21   1    0.54    0.09
   5  21  -1    0.60    0.06
   5  21  -1    0.53    0.11
   5 -21   1    0.69    0.11
  -5 -21   1    0.54    0.09
   5  21   1    0.58    0.07
   5 -21  -1    0.64    0.10
  -5 -21   1    0.57    0.09
   5 -21  -1    0.55    0.07
  -5  21  -1    0.66    0.09
   5  21   1    0.64    0.11
  -5  21  -1    0.64    0.11
  -7 -21  -1    0.40    0.08
  -7  21   1    0.41    0.09
   7 -21   1    0.46    0.09
  -7  21   1    0.65    0.10
   7 -21   1    0.41    0.06
   7  21  -1    0.37    0.09
  -7 -21  -1    0.51    0.09
   7  21   1    0.30    0.09
  -7  21  -1    0.47    0.08
  -7 -21   1    0.52    0.09
   7 -21  -1    0.46    0.07
  -7  21  -1    0.40    0.09
   7 -21  -1    0.52    0.10
  -7 -21   1    0.36    0.09
  -9  21   1    0.65    0.10
   9 -21   1    0.58    0.10
  -9 -21  -1    0.61    0.10
  -9 -21  -1    0.51    0.09
  -9  21   1    0.59    0.10
   9  21  -1    0.54    0.11
   9 -21  -1    0.79    0.11
  -9 -21   1    0.66    0.10
  -9 -21   1    0.80    0.12
   9  21   1    0.59    0.11
  -9  21  -1    0.59    0.11
   9 -21  -1    0.68    0.08
  -9  21  -1    0.57    0.10
 -11 -21  -1    0.33    0.09
 -11  21   1    0.29    0.08
  11  21  -1    0.61    0.10
 -11  21   1    0.34    0.08
 -11 -21  -1    0.42    0.09
  11 -21   1    0.18    0.07
  11  21  -1    0.40    0.10
 -11 -21   1    0.39    0.09
 -11  21  -1    0.36    0.08
 -11  21  -1    0.40    0.10
  11  21   1    0.38    0.10
  11 -21  -1    0.49    0.10
 -11 -21   1    0.29    0.08
  13  21  -1    1.40    0.17
 -13  21   1    1.61    0.14
 -13  21   1    1.42    0.15
  13 -21   1    1.81    0.18
 -13 -21  -1    1.67    0.16
 -13 -21  -1    1.81    0.18
  13  21  -1    1.76    0.17
 -13  21  -1    1.93    0.16
  13  21   1    1.43    0.17
  13 -21  -1    1.64    0.17
 -13  21  -1    1.64    0.17
 -13 -21   1    1.79    0.16
  15 -21   1    0.10    0.08
  15  21  -1    0.13    0.08
 -15  21   1    0.21    0.08
 -15  21   1    0.03    0.07
  15  21  -1    0.11    0.08
 -15 -21  -1    0.27    0.08
  15 -21  -1    0.20    0.09
  15  21   1    0.01    0.07
 -15  21  -1    0.20    0.08
 -15 -21   1    0.17    0.08
  15  21   1    0.19    0.08
 -15  21  -1    0.24    0.08
  17  21  -1    0.11    0.08
 -17  21   1   -0.05    0.05
 -17 -21  -1   -0.02    0.07
  17 -21   1    0.00    0.06
  17  21  -1    0.03    0.07
  17 -21  -1   -0.08    0.06
 -17  21  -1    0.07    0.06
 -17  21  -1    0.05    0.08
 -17 -21   1    0.00    0.07
  17  21   1   -0.03    0.06
  17  21   1   -0.01    0.06
  19  21  -1    0.33    0.11
  19  21  -1    0.64    0.13
 -19  21   1    0.52    0.12
 -19 -21  -1    0.24    0.10
  19 -21   1    0.41    0.11
  19 -21  -1    0.49    0.11
 -19  21  -1    0.43    0.10
  19  21   1    0.49    0.12
 -19 -21   1    0.57    0.12
  19  21   1    0.35    0.10
 -21  21   1   -0.05    0.07
  21  21  -1   -0.06    0.06
  21  21  -1    0.16    0.09
 -21 -21  -1    0.06    0.08
  21 -21   1    0.01    0.07
 -21 -21   1    0.02    0.08
  21 -21  -1   -0.01    0.07
  21  21   1    0.06    0.07
 -21  21  -1    0.01    0.07
  21  21   1    0.01    0.07
  23 -21   1    1.42    0.19
 -23 -21  -1    1.76    0.19
  23  21  -1    1.23    0.18
  23  21  -1    1.77    0.21
 -23  21   1    1.84    0.20
  23  21   1    1.67    0.20
  23  21   1    1.53    0.19
 -23 -21   1    1.64    0.19
 -23  21  -1    1.62    0.19
  23 -21  -1    1.72    0.20
  25 -21   1    0.28    0.11
  25  21  -1    0.46    0.13
  25  21  -1    0.20    0.11
 -25  21   1    0.31    0.12
 -25 -21  -1    0.31    0.11
  25  21   1    0.10    0.10
  25 -21  -1    0.09    0.09
 -25  21  -1    0.27    0.11
  25  21   1    0.18    0.10
 -25 -21   1    0.51    0.13
 -27 -21  -1    0.24    0.11
 -27  21   1    0.15    0.10
  27  21  -1    0.35    0.14
  27 -21   1    0.49    0.13
  27  21  -1   -0.05    0.08
 -27 -21   1    0.22    0.11
  27  21   1    0.37    0.13
 -27  21  -1    0.37    0.13
  27  21   1    0.19    0.11
  27 -21  -1    0.11    0.10
  29  21  -1   -0.01    0.10
 -29  21   1    0.06    0.10
  29 -21   1    0.18    0.11
 -29 -21  -1    0.00    0.10
  29  21  -1   -0.07    0.09
  29  21   1    0.01    0.10
  29  21   1    0.09    0.10
 -29  21  -1    0.18    0.11
  29 -21  -1    0.03    0.09
 -29 -21   1   -0.11    0.08
  31  21  -1    0.97    0.18
  31 -21   1    0.84    0.17
 -31  21   1    0.74    0.17
  31  21  -1    0.98    0.20
  31  21   1    0.80    0.17
  31  21   1    1.00    0.19
 -31  21  -1    1.09    0.19
 -31 -21   1    1.04    0.18
  31 -21  -1    0.56    0.15
 -33  21   1    0.83    0.19
  33 -21   1    0.89    0.18
  33  21  -1    0.77    0.17
  33  21  -1    0.55    0.17
  33  21   1    0.52    0.15
  33 -21  -1    0.65    0.16
 -33  21  -1    0.77    0.18
  33  21   1    0.53    0.15
  35 -21   1    0.25    0.12
 -35  21   1   -0.04    0.11
  35  21  -1    0.04    0.11
  35  21   1   -0.04    0.10
  35 -21  -1   -0.18    0.09
 -35  21  -1    0.01    0.13
  35  21   1    0.16    0.12
  -1 -23  -1    0.30    0.08
   1  23  -1    0.21    0.08
   1 -23   1    0.24    0.07
   1 -23   1    0.27    0.06
   1  23  -1    0.23    0.06
  -1 -23  -1    0.25    0.07
  -1  23   1    0.23    0.06
  -1  23   1    0.30    0.08
   1  23   1    0.29    0.07
   1 -23  -1    0.19    0.07
  -1 -23   1    0.26    0.07
  -1  23  -1    0.20    0.06
  -1  23  -1    0.26    0.08
  -1 -23   1    0.36    0.08
   1  23   1    0.35    0.09
   1 -23  -1    0.25    0.07
  -3 -23  -1   -0.01    0.05
  -3 -23  -1    0.09    0.06
  -3  23   1    0.02    0.05
   3 -23   1    0.11    0.06
   3 -23   1    0.08    0.04
   3  23  -1    0.07    0.04
  -3  23   1   -0.02    0.05
   3  23  -1    0.11    0.07
   3  23   1    0.13    0.05
  -3  23  -1    0.03    0.05
   3  23   1   -0.04    0.05
  -3  23  -1    0.03    0.06
   3 -23  -1    0.01    0.06
  -3 -23   1    0.05    0.05
   3 -23  -1    0.09    0.05
  -3 -23   1    0.09    0.06
   5  23  -1    0.29    0.09
   5 -23   1    0.45    0.10
  -5  23   1    0.65    0.10
  -5 -23  -1    0.42    0.09
  -5  23   1    0.58    0.10
  -5 -23  -1    0.58    0.10
  -5  23  -1    0.54    0.09
   5 -23  -1    0.35    0.09
  -5  23  -1    0.48    0.10
  -5 -23   1    0.50    0.09
   5 -23  -1    0.51    0.07
  -5 -23   1    0.47    0.10
   5  23   1    0.55    0.11
  -7  23   1    0.13    0.07
   7 -23   1    0.36    0.09
  -7 -23  -1    0.26    0.08
  -7 -23  -1    0.19    0.08
  -7  23   1    0.23    0.07
   7  23  -1    0.36    0.10
  -7 -23   1    0.23    0.08
  -7 -23   1    0.38    0.08
   7 -23  -1    0.25    0.08
  -7  23  -1    0.43    0.10
  -7  23  -1    0.29    0.07
   7  23   1    0.30    0.09
  -9 -23  -1    1.05    0.13
   9  23  -1    0.90    0.14
  -9 -23  -1    1.04    0.13
  -9  23   1    1.06    0.13
  -9  23   1    0.88    0.12
   9 -23   1    1.01    0.13
   9 -23  -1    0.73    0.11
  -9  23  -1    1.24    0.15
  -9  23  -1    1.17    0.13
  -9 -23   1    0.74    0.12
  -9 -23   1    1.00    0.13
   9  23   1    1.00    0.15
 -11  23   1    3.11    0.20
 -11  23   1    3.22    0.20
  11 -23   1    3.51    0.22
  11 -23  -1    3.27    0.21
 -11  23  -1    3.39    0.20
 -11  23  -1    2.86    0.20
  13  23  -1    4.65    0.28
 -13  23   1    5.04    0.26
  13 -23   1    5.12    0.27
 -13 -23  -1    5.24    0.28
 -13 -23  -1    5.30    0.26
 -13  23   1    4.62    0.24
 -13  23  -1    5.53    0.27
 -13  23  -1    5.46    0.26
  13  23   1    4.28    0.27
 -13 -23   1    4.74    0.26
 -13 -23   1    4.56    0.26
  13 -23  -1    5.22    0.27
 -15  23   1    0.66    0.12
  15 -23   1    0.54    0.12
  15  23  -1    0.57    0.13
 -15 -23  -1    0.63    0.13
 -15 -23  -1    0.66    0.12
  15  23  -1    0.95    0.13
 -15  23  -1    1.05    0.14
 -15 -23   1    0.78    0.13
  15 -23  -1    0.64    0.12
  15  23   1    0.58    0.12
 -15  23  -1    0.78    0.12
  17  23  -1    0.53    0.12
  17  23  -1    0.42    0.11
 -17 -23  -1    0.39    0.11
 -17  23   1    0.34    0.10
 -17 -23  -1    0.25    0.09
  17 -23   1    0.36    0.11
  17  23   1    0.27    0.10
 -17  23  -1    0.35    0.10
 -17 -23   1    0.59    0.12
  17 -23  -1    0.50    0.12
 -19 -23  -1    0.63    0.12
 -19  23   1    0.43    0.12
  19  23  -1    0.40    0.11
  19 -23   1    0.58    0.13
  19  23  -1    0.71    0.13
 -19 -23  -1    0.29    0.11
  19  23   1    0.61    0.14
  19 -23  -1    0.42    0.11
 -19  23  -1    0.48    0.12
  19  23   1    0.57    0.13
 -19 -23   1    0.46    0.11
  21 -23   1    0.70    0.14
 -21 -23  -1    0.71    0.13
 -21  23   1    0.60    0.13
  21  23  -1    0.52    0.13
  21  23  -1    0.51    0.13
 -21  23  -1    0.66    0.13
  21  23   1    0.53    0.14
  21 -23  -1    0.43    0.12
 -21 -23   1    0.76    0.14
  21  23   1    0.43    0.12
  23  23  -1    0.03    0.10
 -23  23   1    0.12    0.09
  23 -23   1   -0.05    0.07
  23  23  -1    0.02    0.08
 -23 -23  -1   -0.01    0.08
  23  23   1   -0.07    0.07
 -23  23  -1   -0.04    0.07
  23  23   1   -0.20    0.07
 -23 -23   1   -0.01    0.09
  23 -23  -1    0.04    0.08
  25 -23   1    0.38    0.11
 -25  23   1    0.49    0.13
 -25 -23  -1    0.25    0.11
  25  23  -1    0.29    0.13
  25  23  -1    0.12    0.10
  25 -23  -1    0.38    0.12
 -25 -23   1    0.27    0.12
  25  23   1    0.59    0.14
 -25  23  -1    0.28    0.11
  25  23   1    0.44    0.14
  27  23  -1    0.92    0.19
 -27 -23  -1    0.49    0.14
  27 -23   1    0.76    0.15
  27  23  -1    0.68    0.15
 -27  23   1    0.78    0.16
  27 -23  -1    0.68    0.15
  27  23   1    0.64    0.16
  27  23   1    0.50    0.15
 -27  23  -1    0.74    0.16
 -27 -23   1    0.48    0.13
  29 -23   1    0.02    0.09
  29  23  -1    0.14    0.12
 -29  23   1    0.20    0.13
  29  23  -1    0.05    0.10
  29 -23  -1    0.11    0.11
  29  23   1    0.14    0.12
 -29  23  -1    0.21    0.12
  29  23   1    0.02    0.10
 -29 -23   1    0.13    0.12
  31  23  -1   -0.03    0.11
  31 -23   1    0.04    0.11
  31  23  -1    0.15    0.11
 -31  23   1   -0.06    0.10
  31  23   1    0.15    0.13
  31  23   1   -0.04    0.11
 -31  23  -1    0.02    0.12
  31 -23  -1    0.09    0.11
  33 -23   1    0.15    0.11
  33  23  -1    0.29    0.14
 -33  23   1    0.16    0.13
  33  23  -1    0.28    0.14
 -33  23  -1   -0.11    0.13
  33  23   1    0.39    0.14
  33 -23  -1   -0.03    0.10
  33  23   1    0.21    0.15
 -35 -23  -1    0.25    0.16
  35 -23   1    0.13    0.12
 -35  23   1    0.43    0.17
  35  23  -1    0.38    0.16
  35  23   1    0.43    0.16
  35 -23  -1    0.36    0.14
 -35  23  -1    0.21    0.14
  35  23   1    0.20    0.13
  -1  25   1    0.60    0.12
  -1 -25  -1    0.72    0.10
  -1 -25  -1    0.78    0.12
   1  25  -1    0.65    0.12
  -1  25   1    0.80    0.11
   1  25  -1    0.77    0.10
   1 -25   1    0.76    0.10
   1 -25   1    0.78    0.12
   1 -25  -1    0.64    0.11
  -1 -25   1    0.55    0.10
   1  25   1    0.78    0.13
   1  25   1    0.88    0.10
  -1  25  -1    0.80    0.10
  -1  25  -1    0.63    0.12
  -1 -25   1    0.83    0.11
   1 -25  -1    0.84    0.10
  -3  25   1    0.65    0.10
  -3 -25  -1    0.45    0.09
   3  25  -1    0.47    0.11
  -3 -25  -1    0.54    0.10
   3 -25   1    0.45    0.10
  -3  25   1    0.60    0.11
  -3 -25   1    0.53    0.10
  -3  25  -1    0.56    0.09
  -3 -25   1    0.59    0.10
  -3  25  -1    0.54    0.11
   3 -25  -1    0.62    0.09
   3  25   1    0.52    0.11
   3 -25  -1    0.54    0.10
   5  25  -1    1.76    0.19
  -5  25   1    1.96    0.17
  -5 -25  -1    1.79    0.17
   5 -25   1    1.82    0.18
  -5 -25  -1    2.07    0.16
  -5  25   1    2.04    0.16
   5  25   1    1.83    0.19
  -5  25  -1    2.03    0.15
   5 -25  -1    1.91    0.17
  -5 -25   1    1.94    0.17
  -5  25  -1    2.02    0.17
  -5 -25   1    1.67    0.15
   7 -25   1   -0.10    0.06
  -7  25   1    0.14    0.06
  -7 -25  -1    0.03    0.06
  -7  25   1    0.00    0.06
   7  25  -1    0.11    0.08
  -7 -25  -1   -0.01    0.06
   7  25   1    0.05    0.07
  -7 -25   1   -0.10    0.05
   7 -25  -1   -0.02    0.07
  -7  25  -1   -0.01    0.05
  -7 -25   1   -0.03    0.06
  -7  25  -1    0.05    0.07
  -9  25   1    0.54    0.11
  -9 -25  -1    0.67    0.12
  -9 -25  -1    0.46    0.11
   9 -25   1    0.69    0.12
   9  25  -1    0.40    0.11
  -9  25   1    0.64    0.11
   9  25   1    0.42    0.11
  -9 -25   1    0.52    0.11
   9 -25  -1    0.52    0.11
  -9 -25   1    0.32    0.09
  -9  25  -1    0.43    0.11
  -9  25  -1    0.57    0.11
 -11  25   1    1.98    0.17
 -11  25   1    2.02    0.17
 -11 -25  -1    2.18    0.18
 -11 -25  -1    1.77    0.18
  11  25  -1    2.25    0.20
  11 -25   1    1.89    0.19
 -11 -25   1    1.87    0.19
  11 -25  -1    2.15    0.18
 -11  25  -1    2.07    0.18
  11  25   1    1.66    0.19
 -11  25  -1    2.35    0.18
 -11 -25   1    2.08    0.17
  13 -25   1    1.49    0.18
 -13 -25  -1    1.45    0.16
 -13 -25  -1    0.94    0.15
  13  25  -1    0.86    0.15
 -13  25   1    1.30    0.16
 -13  25   1    1.10    0.14
 -13 -25   1    1.35    0.16
  13  25   1    0.82    0.14
 -13 -25   1    0.99    0.15
  13 -25  -1    1.28    0.16
 -13  25  -1    1.18    0.15
 -13  25  -1    1.14    0.15
 -15 -25  -1    1.49    0.17
  15  25  -1    1.12    0.17
 -15  25   1    1.74    0.19
 -15 -25  -1    1.51    0.18
  15 -25   1    1.54    0.18
 -15 -25   1    1.39    0.17
 -15  25  -1    1.54    0.18
 -15 -25   1    1.42    0.18
  15 -25  -1    1.43    0.17
  15  25   1    0.92    0.16
 -15  25  -1    1.50    0.17
  17  25  -1    0.25    0.10
 -17  25   1    0.26    0.10
 -17 -25  -1    0.31    0.10
  17 -25   1    0.37    0.11
 -17 -25  -1    0.34    0.12
  17  25   1    0.22    0.10
  17 -25  -1    0.35    0.11
 -17 -25   1    0.15    0.09
 -17  25  -1    0.44    0.11
 -17 -25   1    0.13    0.10
  19  25  -1    0.67    0.14
 -19  25   1    0.62    0.14
 -19 -25  -1    0.74    0.15
  19 -25   1    0.44    0.12
 -19 -25  -1    0.62    0.12
 -19 -25   1    0.66    0.13
  19  25   1    0.67    0.15
 -19  25  -1    0.57    0.12
 -19 -25   1    0.84    0.16
  19 -25  -1    0.62    0.13
  21  25  -1    0.20    0.11
 -21 -25  -1    0.09    0.10
 -21  25   1    0.15    0.10
  21 -25   1    0.38    0.12
 -21 -25  -1    0.07    0.09
  21  25  -1    0.40    0.13
 -21  25  -1    0.26    0.12
  21  25   1    0.25    0.11
  21 -25  -1    0.27    0.11
 -21 -25   1    0.37    0.12
  23  25  -1    0.88    0.17
 -23 -25  -1    0.74    0.16
  23  25  -1    0.87    0.17
 -23 -25  -1    0.99    0.16
  23 -25   1    0.70    0.15
 -23  25   1    1.45    0.20
 -23  25  -1    1.17    0.18
 -23 -25   1    0.86    0.16
  23 -25  -1    0.83    0.16
  23  25   1    0.95    0.18
 -25 -25  -1    0.07    0.10
 -25 -25  -1    0.04    0.10
  25 -25   1    0.20    0.11
 -25  25   1    0.19    0.11
  25  25  -1    0.13    0.13
  25  25  -1    0.10    0.10
 -25 -25   1    0.07    0.10
  25  25   1    0.10    0.11
 -25  25  -1   -0.03    0.10
  25 -25  -1    0.16    0.11
  27  25  -1    0.27    0.14
 -27 -25  -1    0.27    0.14
 -27  25   1    0.22    0.12
  27  25  -1    0.20    0.12
  27 -25   1    0.28    0.12
 -27 -25   1    0.24    0.12
 -27  25  -1    0.31    0.13
  27  25   1    0.26    0.13
  27 -25  -1    0.32    0.13
 -29 -25  -1    0.04    0.12
  29  25  -1    0.08    0.11
  29 -25   1    0.05    0.10
  29  25  -1    0.05    0.12
 -29  25   1   -0.16    0.10
  29 -25  -1   -0.02    0.09
  29  25   1    0.13    0.13
 -29  25  -1   -0.08    0.10
 -31  25   1    3.63    0.34
  31  25  -1    3.43    0.33
  31 -25   1    3.84    0.31
 -31 -25  -1    3.40    0.35
  31  25  -1    3.29    0.30
 -31  25  -1    3.54    0.31
  31 -25  -1    3.53    0.30
  31  25   1    3.27    0.29
 -33  25   1    0.17    0.14
  33 -25   1    0.19    0.11
 -33 -25  -1    0.08    0.13
  33  25  -1    0.09    0.13
  33  25  -1    0.11    0.12
  33 -25  -1    0.28    0.13
  33  25   1    0.10    0.12
 -33  25  -1    0.12    0.13
  -1  27   1    0.46    0.11
  -1 -27  -1    0.30    0.09
   1  27  -1    0.45    0.11
   1 -27   1    0.16    0.08
  -1 -27  -1    0.39    0.08
  -1  27   1    0.22    0.07
  -1 -27   1    0.32    0.10
  -1  27  -1    0.36    0.11
  -1 -27   1    0.28    0.07
   1 -27  -1    0.15    0.08
  -1  27  -1    0.24    0.07
   1 -27  -1    0.41    0.09
   1  27   1    0.29    0.10
   3 -27   1    0.30    0.10
  -3  27   1    0.21    0.07
   3  27  -1    0.34    0.10
  -3  27   1    0.30    0.10
  -3 -27  -1    0.29    0.09
  -3 -27  -1    0.28    0.08
  -3 -27   1    0.28    0.09
  -3 -27   1    0.29    0.08
  -3  27  -1    0.41    0.11
   3  27   1    0.23    0.10
  -3  27  -1    0.34    0.08
   3 -27  -1    0.05    0.08
  -5  27   1    1.98    0.18
  -5 -27  -1    1.90    0.16
  -5  27   1    1.85    0.16
  -5 -27  -1    2.16    0.18
   5 -27   1    1.58    0.17
   5  27  -1    1.66    0.19
   5  27   1    1.68    0.19
  -5 -27   1    1.85    0.16
  -5 -27   1    1.74    0.18
  -5  27  -1    1.60    0.18
   5 -27  -1    1.66    0.18
  -5  27  -1    1.78    0.15
  -7 -27  -1    0.32    0.09
  -7  27   1    0.13    0.07
  -7  27   1    0.02    0.08
  -7 -27  -1    0.10    0.08
   7 -27   1    0.21    0.08
   7  27  -1   -0.04    0.07
  -7  27  -1    0.04    0.06
   7 -27  -1    0.00    0.07
  -7 -27   1    0.03    0.06
   7  27   1    0.22    0.09
  -7 -27   1   -0.02    0.07
  -7  27  -1    0.12    0.08
  -9  27   1    1.08    0.14
  -9 -27  -1    0.89    0.14
   9  27  -1    1.01    0.16
  -9  27   1    0.87    0.13
   9 -27   1    1.04    0.15
  -9 -27  -1    1.15    0.14
   9  27   1    1.11    0.17
  -9  27  -1    1.13    0.14
  -9 -27   1    1.08    0.15
  -9 -27   1    1.16    0.15
   9 -27  -1    0.94    0.14
  -9  27  -1    1.18    0.15
 -11 -27  -1    1.16    0.16
 -11  27   1    1.16    0.15
 -11  27   1    1.18    0.15
 -11 -27  -1    0.97    0.14
  11 -27   1    1.26    0.16
  11  27  -1    1.13    0.18
 -11 -27   1    1.12    0.15
  11  27   1    1.17    0.19
 -11  27  -1    0.95    0.14
 -11  27  -1    1.15    0.15
  11 -27  -1    1.22    0.16
 -11 -27   1    1.01    0.15
  13  27  -1    0.25    0.11
 -13  27   1    0.12    0.08
 -13 -27  -1    0.31    0.10
 -13 -27  -1    0.20    0.10
 -13  27   1    0.18    0.09
  13 -27   1    0.13    0.09
 -13  27  -1    0.26    0.10
  13  27   1    0.15    0.10
 -13  27  -1    0.13    0.09
  13 -27  -1    0.17    0.09
 -13 -27   1    0.21    0.10
 -13 -27   1    0.17    0.09
 -15 -27  -1    0.50    0.13
  15 -27   1    0.22    0.10
 -15 -27  -1    0.33    0.10
  15  27  -1    0.33    0.12
 -15  27   1    0.23    0.10
  15  27   1    0.43    0.12
 -15 -27   1    0.14    0.10
  15 -27  -1    0.31    0.10
 -15  27  -1    0.28    0.10
 -15 -27   1    0.32    0.11
 -17  27   1    0.36    0.11
  17  27  -1    0.37    0.12
  17 -27   1    0.58    0.13
 -17 -27  -1    0.10    0.09
 -17 -27  -1    0.62    0.14
 -17  27  -1    0.44    0.12
  17  27   1    0.58    0.15
 -17 -27   1    0.30    0.11
  17 -27  -1    0.57    0.13
 -17 -27   1    0.56    0.12
  19  27  -1    0.60    0.14
  19 -27   1    0.61    0.14
 -19 -27  -1    0.71    0.14
 -19  27   1    0.86    0.16
 -19 -27  -1    0.59    0.15
  19  27   1    0.49    0.13
 -19  27  -1    0.55    0.13
 -19 -27   1    0.64    0.14
 -19 -27   1    0.73    0.16
  19 -27  -1    0.84    0.15
  21  27  -1    0.23    0.12
 -21 -27  -1    0.35    0.11
 -21  27   1    0.42    0.12
  21 -27   1    0.16    0.10
 -21 -27  -1    0.39    0.14
 -21 -27   1    0.28    0.12
 -21  27  -1    0.50    0.13
  21  27   1    0.26    0.13
 -21 -27   1    0.22    0.11
  21 -27  -1    0.17    0.11
 -23  27   1    0.36    0.12
 -23 -27  -1    0.40    0.12
  23 -27   1    0.36    0.13
 -23 -27  -1    0.35    0.13
  23  27  -1    0.21    0.12
 -23 -27   1    0.37    0.12
  23 -27  -1    0.34    0.13
  23  27   1    0.39    0.14
 -23 -27   1    0.35    0.14
 -23  27  -1    0.24    0.12
  25 -27   1    0.05    0.11
 -25  27   1    0.07    0.11
  25  27  -1    0.16    0.11
 -25 -27  -1    0.20    0.13
 -25 -27   1    0.06    0.10
 -25  27  -1    0.00    0.10
 -25 -27   1   -0.22    0.08
  25  27   1    0.01    0.10
  25 -27  -1   -0.08    0.09
 -27  27   1    1.15    0.20
 -27 -27  -1    1.14    0.22
  27  27  -1    1.36    0.22
  27 -27   1    1.49    0.22
 -27  27  -1    1.59    0.23
 -27 -27   1    1.83    0.27
  27 -27  -1    1.60    0.22
  27  27   1    1.76    0.24
 -29 -27  -1    0.03    0.12
  29  27  -1   -0.01    0.11
  29 -27   1    0.12    0.11
 -29  27   1    0.04    0.11
 -29  27  -1    0.01    0.10
  29 -27  -1    0.30    0.13
 -29 -27   1    0.05    0.12
  29  27   1    0.02    0.11
 -31  27   1    0.30    0.16
 -31 -27  -1    0.33    0.16
  31 -27   1    0.55    0.15
  31  27  -1    0.50    0.16
  31 -27  -1    0.66    0.17
 -31  27  -1    0.36    0.14
  31  27   1    0.42    0.14
 -31 -27   1    0.48    0.17
  33  27  -1    0.32    0.15
  33  27   1    0.47    0.17
  -1  29   1    0.63    0.13
   1  29  -1    0.65    0.14
   1 -29   1    0.50    0.11
  -1 -29  -1    0.63    0.12
   1 -29  -1    0.53    0.12
   1  29   1    0.64    0.13
  -1 -29   1    0.46    0.12
  -1  29  -1    0.64    0.13
   3 -29   1    0.09    0.08
   3  29  -1    0.03    0.09
  -3  29   1    0.08    0.07
  -3 -29  -1   -0.02    0.07
  -3 -29  -1    0.04    0.06
  -3  29   1   -0.09    0.07
  -3  29  -1    0.10    0.08
   3 -29  -1   -0.03    0.07
   3  29   1    0.07    0.08
  -3  29  -1    0.12    0.07
  -3 -29   1    0.04    0.07
  -5  29   1    0.21    0.09
  -5  29   1    0.15    0.08
   5 -29   1    0.38    0.10
   5  29  -1    0.24    0.10
  -5 -29  -1    0.16    0.08
  -5 -29  -1    0.17    0.09
  -5 -29   1    0.18    0.09
  -5 -29   1    0.17    0.08
  -5  29  -1    0.21    0.08
  -5  29  -1    0.10    0.09
   5 -29  -1    0.01    0.07
   5  29   1    0.06    0.08
  -7 -29  -1    0.02    0.07
  -7  29   1   -0.03    0.07
   7 -29   1    0.00    0.07
  -7  29   1   -0.06    0.06
  -7 -29  -1    0.03    0.08
   7  29  -1   -0.02    0.08
  -7  29  -1    0.13    0.09
  -7 -29   1   -0.05    0.07
   7 -29  -1   -0.02    0.07
   7  29   1    0.08    0.08
  -7 -29   1    0.00    0.06
  -7  29  -1   -0.03    0.06
   9  29  -1    0.02    0.09
  -9 -29  -1    0.12    0.08
  -9  29   1   -0.02    0.07
  -9  29   1    0.03    0.07
  -9 -29  -1    0.07    0.08
   9 -29   1    0.18    0.09
   9  29   1    0.00    0.08
  -9  29  -1    0.11    0.09
  -9  29  -1    0.21    0.09
  -9 -29   1    0.14    0.10
   9 -29  -1   -0.03    0.07
  -9 -29   1    0.14    0.08
 -11 -29  -1    0.16    0.09
  11  29  -1   -0.05    0.08
 -11 -29  -1   -0.01    0.08
  11 -29   1   -0.08    0.07
 -11  29   1    0.03    0.08
 -11  29   1   -0.03    0.07
 -11  29  -1   -0.07    0.07
 -11 -29   1   -0.08    0.08
  11 -29  -1    0.10    0.09
 -11 -29   1    0.11    0.09
  11  29   1    0.18    0.11
 -11  29  -1    0.02    0.07
 -13 -29  -1    0.27    0.11
 -13 -29  -1    0.22    0.10
 -13  29   1    0.25    0.10
  13  29  -1    0.26    0.12
  13 -29   1    0.36    0.11
 -13  29  -1    0.37    0.11
 -13 -29   1    0.17    0.10
  13 -29  -1    0.17    0.10
 -13 -29   1    0.13    0.09
 -13  29  -1    0.18    0.10
  13  29   1    0.04    0.10
 -15 -29  -1    0.06    0.08
  15  29  -1    0.11    0.10
 -15  29   1   -0.06    0.07
 -15 -29  -1    0.11    0.10
  15 -29   1    0.02    0.07
  15  29   1    0.27    0.11
 -15 -29   1    0.09    0.10
  15 -29  -1    0.11    0.09
 -15 -29   1   -0.01    0.08
 -15  29  -1    0.19    0.10
  17  29  -1    0.05    0.09
 -17 -29  -1   -0.03    0.09
  17 -29   1   -0.07    0.08
 -17  29   1    0.00    0.09
 -17 -29  -1    0.24    0.10
  17  29   1    0.07    0.10
  17 -29  -1    0.13    0.10
 -17 -29   1    0.22    0.11
 -17  29  -1    0.01    0.09
 -17 -29   1    0.18    0.11
 -19 -29  -1    0.45    0.14
  19  29  -1    0.67    0.16
 -19  29   1    0.43    0.13
  19 -29   1    0.29    0.12
 -19 -29  -1    0.49    0.13
  19 -29  -1    0.80    0.16
  19  29   1    0.55    0.16
 -19 -29   1    0.27    0.11
 -19 -29   1    0.42    0.13
 -19  29  -1    0.52    0.14
 -21 -29  -1    0.04    0.11
 -21 -29  -1   -0.11    0.08
 -21  29   1   -0.04    0.08
  21 -29   1    0.02    0.09
  21  29  -1   -0.04    0.10
 -21 -29   1   -0.03    0.09
  21  29   1   -0.04    0.09
  21 -29  -1   -0.03    0.09
 -21 -29   1    0.07    0.10
 -21  29  -1   -0.05    0.08
 -23 -29  -1    0.36    0.14
 -23  29   1    0.14    0.11
  23  29  -1    0.33    0.15
  23 -29   1    0.16    0.11
 -23 -29   1    0.19    0.11
  23 -29  -1    0.38    0.13
  23  29   1    0.43    0.15
 -23  29  -1    0.22    0.12
 -23 -29   1    0.36    0.13
 -25  29   1   -0.03    0.10
 -25 -29  -1    0.09    0.12
  25 -29   1    0.01    0.09
  25  29  -1    0.12    0.12
 -25  29  -1    0.07    0.11
  25  29   1   -0.21    0.09
 -25 -29   1   -0.09    0.11
  25 -29  -1   -0.07    0.09
 -27 -29  -1   -0.14    0.11
  27  29  -1    0.14    0.13
 -27  29   1    0.00    0.12
  27 -29   1    0.05    0.10
  27  29   1    0.03    0.12
  27 -29  -1    0.03    0.11
 -27 -29   1   -0.05    0.12
 -27  29  -1    0.10    0.12
  29  29  -1    0.18    0.12
 -29  29   1    0.05    0.12
 -29 -29  -1    0.04    0.12
  29 -29   1   -0.05    0.09
  29 -29  -1    0.20    0.12
  29  29   1   -0.07    0.11
 -29 -29   1    0.08    0.13
 -29  29  -1   -0.02    0.11
  31  29  -1   -0.06    0.10
  31  29   1   -0.11    0.11
   1  31  -1    0.91    0.16
  -1  31   1    1.22    0.17
   1 -31   1    1.19    0.17
  -1 -31  -1    1.03    0.15
   1  31   1    1.00    0.16
   1 -31  -1    1.21    0.17
  -1  31  -1    0.96    0.16
  -1 -31   1    1.04    0.15
  -3  31   1    0.85    0.15
   3 -31   1    0.84    0.15
   3  31  -1    0.92    0.16
  -3 -31  -1    0.75    0.14
  -3 -31   1    0.58    0.13
   3  31   1    0.68    0.14
  -3  31  -1    1.05    0.16
   3 -31  -1    1.02    0.16
  -5 -31  -1    0.25    0.10
   5 -31   1    0.41    0.12
  -5  31   1    0.75    0.13
  -5  31   1    0.46    0.12
   5  31  -1    0.66    0.14
  -5 -31  -1    0.33    0.09
   5  31   1    0.38    0.12
   5 -31  -1    0.23    0.10
  -5  31  -1    0.24    0.11
  -5 -31   1    0.43    0.12
  -7  31   1    0.47    0.12
  -7  31   1    0.60    0.12
   7 -31   1    0.70    0.14
  -7 -31  -1    0.56    0.13
   7  31  -1    0.41    0.13
  -7 -31  -1    0.40    0.11
  -7 -31   1    0.55    0.13
   7 -31  -1    0.61    0.13
   7  31   1    0.44    0.13
  -7  31  -1    0.44    0.11
  -7  31  -1    0.74    0.14
  -7 -31   1    0.55    0.12
  -9 -31  -1    0.18    0.10
  -9  31   1    0.22    0.10
   9  31  -1    0.34    0.12
  -9  31   1    0.29    0.10
  -9 -31  -1    0.39    0.12
   9 -31   1    0.18    0.10
  -9 -31   1    0.14    0.09
  -9 -31   1    0.09    0.09
  -9  31  -1    0.25    0.10
   9  31   1    0.22    0.11
  -9  31  -1    0.08    0.09
   9 -31  -1    0.13    0.10
  11 -31   1    0.18    0.10
 -11 -31  -1   -0.05    0.07
 -11  31   1   -0.03    0.07
 -11  31   1    0.07    0.10
 -11 -31  -1    0.05    0.09
  11  31  -1   -0.22    0.09
 -11  31  -1    0.22    0.10
 -11 -31   1    0.19    0.10
  11 -31  -1    0.21    0.10
 -11 -31   1    0.21    0.10
  11  31   1    0.04    0.09
 -11  31  -1   -0.01    0.07
  13  31  -1    0.22    0.11
 -13 -31  -1    0.41    0.12
 -13  31   1    0.12    0.09
  13 -31   1    0.31    0.11
 -13 -31  -1    0.16    0.10
  13 -31  -1    0.33    0.12
 -13 -31   1    0.32    0.12
  13  31   1    0.15    0.11
 -13 -31   1    0.43    0.12
 -13  31  -1    0.41    0.11
 -15 -31  -1    0.02    0.09
 -15  31   1   -0.04    0.09
  15  31  -1   -0.07    0.08
 -15 -31  -1    0.18    0.10
  15 -31   1    0.14    0.10
 -15 -31   1    0.15    0.10
 -15  31  -1    0.21    0.10
  15  31   1    0.07    0.10
 -15 -31   1    0.18    0.11
  15 -31  -1    0.13    0.11
  17  31  -1    0.38    0.13
 -17 -31  -1    0.65    0.15
  17 -31   1    0.20    0.11
 -17  31   1    0.17    0.11
  17  31   1    0.40    0.14
 -17 -31   1    0.49    0.13
  17 -31  -1    0.28    0.12
 -17 -31   1    0.19    0.11
 -17  31  -1    0.46    0.13
  19  31  -1    0.20    0.12
 -19  31   1    0.10    0.11
 -19 -31  -1    0.19    0.12
  19 -31   1    0.45    0.14
 -19 -31  -1    0.14    0.12
 -19 -31   1    0.08    0.11
  19  31   1    0.34    0.13
 -19  31  -1    0.33    0.11
 -19 -31   1    0.13    0.11
  19 -31  -1    0.17    0.11
 -21  31   1    0.43    0.13
 -21 -31  -1    0.17    0.12
  21 -31   1    0.39    0.13
  21  31  -1    0.08    0.11
 -21 -31   1    0.13    0.12
 -21 -31   1    0.22    0.13
  21 -31  -1    0.30    0.13
  21  31   1    0.08    0.11
 -21  31  -1    0.41    0.13
 -23  31   1    0.22    0.13
  23 -31   1    0.21    0.12
 -23 -31  -1    0.01    0.10
  23  31  -1    0.17    0.12
 -23  31  -1    0.15    0.13
 -23 -31   1    0.26    0.14
  23  31   1    0.10    0.12
  23 -31  -1   -0.05    0.10
 -25  31   1    1.28    0.21
 -25 -31  -1    1.09    0.21
  25  31  -1    1.00    0.19
  25 -31   1    0.88    0.19
  25  31   1    0.78    0.19
  25 -31  -1    1.00    0.19
 -25  31  -1    1.07    0.20
 -25 -31   1    0.91    0.19
  27  31  -1    0.25    0.13
 -27  31   1    0.13    0.13
 -27 -31  -1   -0.11    0.11
  27 -31   1    0.26    0.14
  27  31   1    0.19    0.13
  27 -31  -1    0.13    0.12
 -27  31  -1    0.04    0.12
 -27 -31   1    0.11    0.13
  29  31  -1    0.09    0.12
  29  31   1    0.13    0.13
  -1  33   1    0.09    0.09
   1  33  -1    0.06    0.09
   1 -33   1    0.16    0.10
  -1 -33  -1    0.04    0.08
   1  33   1    0.09    0.10
  -1  33  -1    0.24    0.11
  -1 -33   1    0.11    0.08
   1 -33  -1    0.04    0.09
   3  33  -1    0.06    0.09
  -3 -33  -1   -0.02    0.07
   3 -33   1    0.13    0.09
  -3  33   1   -0.02    0.08
   3  33   1    0.10    0.10
   3 -33  -1    0.13    0.09
  -3 -33   1    0.09    0.09
  -3  33  -1    0.03    0.09
  -5 -33  -1    0.25    0.10
   5  33  -1    0.15    0.11
   5 -33   1    0.16    0.10
  -5  33   1    0.16    0.11
   5 -33  -1    0.14    0.10
  -5 -33   1    0.20    0.10
  -5  33  -1    0.02    0.09
   5  33   1    0.12    0.11
  -7  33   1    0.22    0.11
   7  33  -1    0.41    0.13
   7 -33   1    0.18    0.10
  -7 -33  -1    0.35    0.12
  -7 -33   1    0.18    0.11
   7 -33  -1    0.17    0.10
   7  33   1    0.31    0.12
  -7  33  -1    0.32    0.12
  -9 -33  -1    0.06    0.08
  -9  33   1    0.15    0.10
  -9 -33  -1    0.03    0.10
   9 -33   1    0.03    0.09
   9  33  -1    0.10    0.11
  -9  33   1    0.09    0.08
   9 -33  -1    0.00    0.09
  -9  33  -1    0.18    0.09
  -9 -33   1    0.20    0.10
   9  33   1    0.20    0.13
  -9  33  -1    0.09    0.10
 -11  33   1    0.28    0.11
  11 -33   1    0.06    0.10
 -11 -33  -1   -0.09    0.08
  11  33  -1    0.08    0.11
 -11 -33  -1    0.09    0.09
  11 -33  -1    0.13    0.10
 -11 -33   1    0.09    0.10
 -11 -33   1    0.12    0.09
  11  33   1    0.02    0.10
 -11  33  -1   -0.03    0.09
 -11  33  -1    0.10    0.09
  13  33  -1    0.42    0.14
 -13 -33  -1    0.12    0.10
 -13  33   1   -0.01    0.09
 -13 -33  -1    0.25    0.11
  13 -33   1    0.06    0.10
 -13 -33   1    0.05    0.09
  13  33   1    0.11    0.12
 -13 -33   1   -0.01    0.09
  13 -33  -1    0.08    0.10
 -13  33  -1    0.00    0.09
 -15 -33  -1    0.14    0.10
  15 -33   1    0.12    0.11
 -15 -33  -1    0.05    0.10
  15  33  -1    0.21    0.12
 -15  33   1    0.06    0.10
 -15  33  -1    0.17    0.11
 -15 -33   1    0.17    0.11
 -15 -33   1    0.14    0.12
  15  33   1    0.21    0.13
  15 -33  -1    0.00    0.10
  17 -33   1    0.35    0.13
 -17  33   1    0.10    0.11
 -17 -33  -1    0.20    0.12
  17  33  -1    0.38    0.14
 -17 -33  -1    0.13    0.11
  17  33   1    0.13    0.12
 -17 -33   1    0.09    0.11
 -17 -33   1    0.43    0.13
  17 -33  -1    0.08    0.11
 -17  33  -1    0.25    0.12
  19 -33   1    0.32    0.13
 -19  33   1    0.66    0.15
 -19 -33  -1    0.14    0.12
  19  33  -1   -0.03    0.11
  19 -33  -1    0.20    0.12
 -19 -33   1    0.38    0.13
 -19 -33   1    0.47    0.15
 -19  33  -1    0.39    0.13
  19  33   1    0.31    0.14
 -21 -33  -1    0.27    0.13
 -21  33   1    0.28    0.12
  21 -33   1    0.13    0.12
  21  33  -1    0.27    0.13
  21 -33  -1    0.08    0.12
 -21 -33   1    0.40    0.15
  21  33   1    0.36    0.15
 -21  33  -1    0.06    0.10
 -23 -33  -1    0.03    0.12
 -23  33   1    0.00    0.10
  23  33  -1    0.05    0.10
  23 -33   1    0.02    0.11
  23 -33  -1    0.15    0.12
 -23  33  -1    0.15    0.12
 -23 -33   1   -0.04    0.11
  23  33   1   -0.01    0.11
  25 -33   1    0.05    0.11
 -25  33   1   -0.02    0.10
  25  33  -1    0.14    0.12
 -25 -33  -1    0.08    0.11
  25 -33  -1    0.06    0.12
  25  33   1   -0.06    0.10
 -25 -33   1   -0.04    0.10
 -25  33  -1   -0.09    0.09
 -27 -33   1    1.62    0.27
  -1 -35  -1    0.32    0.11
   1 -35   1    0.05    0.10
  -1  35   1    0.07    0.10
   1  35  -1    0.24    0.12
  -1 -35   1    0.20    0.11
   1 -35  -1    0.23    0.11
   1  35   1    0.16    0.11
  -1  35  -1    0.23    0.12
   3  35  -1    0.14    0.12
  -3  35   1    0.18    0.11
  -3 -35  -1    0.32    0.11
   3 -35   1    0.25    0.11
   3 -35  -1    0.12    0.10
  -3  35  -1    0.18    0.11
   3  35   1    0.19    0.12
  -3 -35   1    0.05    0.10
   5  35  -1    0.41    0.14
   5 -35   1    0.20    0.11
  -5  35   1    0.37    0.13
  -5 -35  -1    0.26    0.12
  -5 -35   1    0.35    0.12
  -5  35  -1    0.24    0.12
   5  35   1    0.44    0.13
   5 -35  -1    0.34    0.12
   7  35  -1    0.32    0.14
  -7  35   1    0.30    0.13
   7 -35   1    0.52    0.14
  -7 -35  -1    0.37    0.12
   7 -35  -1    0.53    0.14
  -7  35  -1    0.30    0.12
  -7 -35   1    0.21    0.11
   7  35   1    0.55    0.16
   9  35  -1    1.43    0.22
   9 -35   1    1.42    0.20
  -9 -35  -1    1.56    0.21
  -9  35  -1    1.55    0.20
   9 -35  -1    1.32    0.20
   9  35   1    1.51    0.23
  -9 -35   1    1.33    0.19
  11  35  -1    0.44    0.16
 -11 -35  -1    0.33    0.13
  11 -35   1    0.39    0.14
 -11  35   1    0.34    0.12
 -11  35  -1    0.44    0.13
 -11 -35   1    0.40    0.14
  11  35   1    0.43    0.15
  11 -35  -1    0.56    0.15
  13  35  -1    0.41    0.15
 -13 -35  -1    0.55    0.14
 -13  35   1    0.68    0.15
 -13 -35  -1    0.84    0.17
  13 -35   1    0.60    0.15
  13  35   1    0.52    0.16
 -13  35  -1    0.74    0.16
  13 -35  -1    0.37    0.14
 -13 -35   1    0.47    0.14
 -15  35   1    0.81    0.17
  15 -35   1    1.16    0.19
 -15 -35  -1    0.81    0.17
  15  35  -1    0.71    0.19
 -15  35  -1    0.97    0.18
 -15 -35   1    1.06    0.18
  15 -35  -1    0.71    0.16
 -15 -35   1    0.68    0.16
  15  35   1    0.66    0.18
 -17 -35  -1    0.59    0.16
  17 -35   1    0.81    0.18
  17  35  -1    0.42    0.15
 -17  35   1    1.17    0.20
  17 -35  -1    0.68    0.16
 -17 -35   1    0.60    0.15
 -17 -35   1    0.55    0.15
 -17  35  -1    1.04    0.18
  17  35   1    0.66    0.18
  19  35  -1    0.25    0.15
 -19 -35  -1    0.44    0.15
 -19  35   1    0.39    0.15
  19 -35   1    0.07    0.11
  19  35   1    0.49    0.16
 -19 -35   1    0.36    0.15
 -19  35  -1    0.23    0.13
  19 -35  -1    0.41    0.15
 -21 -35  -1    0.09    0.12
  21  35  -1    0.03    0.11
  21 -35   1    0.02    0.10
 -21  35   1    0.10    0.11
  21  35   1    0.01    0.12
 -21  35  -1    0.06    0.11
  21 -35  -1   -0.05    0.10
 -21 -35   1    0.01    0.11
 -23  35   1    0.46    0.17
  23 -35   1    0.72    0.19
  23  35  -1    0.57    0.17
 -23 -35  -1    0.15    0.13
  23 -35  -1    0.56    0.17
 -23 -35   1    0.85    0.19
  23  35   1    0.84    0.20
 -23  35  -1    0.34    0.14
   1  37  -1    0.04    0.09
   1 -37   1   -0.02    0.10
  -1  37   1    0.06    0.11
  -1 -37  -1    0.02    0.09
   1 -37  -1   -0.01    0.09
  -1  37  -1    0.15    0.11
   1  37   1    0.10    0.11
  -1 -37   1   -0.08    0.09
  -3 -37  -1    0.07    0.09
  -3  37   1   -0.04    0.09
   3 -37   1   -0.03    0.09
   3  37  -1    0.12    0.12
   3 -37  -1    0.07    0.11
  -3  37  -1    0.08    0.11
   3  37   1    0.01    0.10
  -3 -37   1    0.34    0.13
   5 -37   1    0.40    0.14
  -5 -37  -1    0.67    0.15
  -5  37   1    0.36    0.13
   5  37  -1    0.22    0.13
   5  37   1    0.27    0.14
  -5 -37   1    0.47    0.13
   5 -37  -1    0.43    0.14
  -5  37  -1    0.64    0.16
   7  37  -1   -0.03    0.10
  -7 -37  -1    0.00    0.10
  -7  37   1    0.10    0.10
   7 -37   1   -0.03    0.09
   7 -37  -1    0.00    0.10
   7  37   1    0.00    0.12
  -7 -37   1    0.02    0.10
  -7  37  -1   -0.04    0.09
  -9 -37  -1    0.14    0.11
   9 -37   1    0.04    0.10
   9  37  -1    0.07    0.12
  -9 -37   1    0.13    0.12
   9  37   1    0.14    0.12
   9 -37  -1    0.14    0.11
  11  37  -1   -0.04    0.10
  11 -37   1    0.03    0.10
 -11 -37  -1    0.01    0.10
  11  37   1   -0.07    0.11
  11 -37  -1    0.01    0.11
 -11 -37   1   -0.12    0.09
  13  37  -1    0.34    0.15
  13 -37   1    0.29    0.14
  13 -37  -1    0.41    0.15
 -13 -37   1    0.46    0.15
  13  37   1    0.50    0.16
  15 -37   1    0.06    0.12
  15  37  -1    0.18    0.14
 -15  37   1    0.00    0.11
 -15  37  -1    0.29    0.13
  15 -37  -1    0.27    0.14
 -15 -37   1    0.21    0.13
  15  37   1    0.01    0.11
  17 -37   1   -0.04    0.10
 -17 -37  -1    0.01    0.12
 -17  37   1   -0.03    0.10
  17  37  -1    0.00    0.10
  17  37   1   -0.03    0.11
  17 -37  -1    0.05    0.11
 -17  37  -1    0.02    0.11
 -19 -37  -1    0.12    0.13
  19 -37   1    0.17    0.13
  19  37  -1    0.05    0.11
 -19  37   1    0.08    0.11
 -19  37  -1    0.18    0.13
 -19 -37   1    0.26    0.15
  19 -37  -1    0.23    0.12
  19  37   1    0.09    0.12
 -21  37   1   -0.11    0.10
 -21 -37  -1    0.02    0.11
 -21  37  -1   -0.08    0.11
 -21 -37   1    0.00    0.10
   1  39  -1    1.55    0.23
   1 -39   1    1.11    0.20
  -1 -39  -1    1.56    0.22
  -1  39   1    1.32    0.21
  -1 -39   1    1.49    0.22
   1 -39  -1    1.12    0.19
   1  39   1    1.26    0.20
  -1  39  -1    1.43    0.22
  -3  39   1    0.30    0.13
  -3 -39  -1    0.03    0.11
   3  39  -1    0.47    0.16
   3 -39   1    0.35    0.14
  -3  39  -1    0.33    0.14
   3  39   1    0.29    0.14
  -3 -39   1    0.14    0.11
   3 -39  -1    0.29    0.13
  -5 -39  -1    0.09    0.12
  -5  39   1   -0.03    0.10
   5 -39   1    0.17    0.12
   5  39  -1    0.23    0.13
  -5 -39   1    0.17    0.12
   5  39   1    0.21    0.15
  -5  39  -1    0.33    0.13
   5 -39  -1    0.15    0.12
   7 -39   1    0.34    0.14
  -7 -39  -1    0.10    0.12
   7  39  -1   -0.02    0.12
   7 -39  -1    0.36    0.14
   7  39   1    0.13    0.13
  -7 -39   1    0.19    0.12
  -7  39  -1    0.21    0.12
  -9 -39  -1    0.59    0.16
   9  39  -1    0.30    0.15
   9 -39   1    0.27    0.14
  -9 -39   1    0.22    0.14
   9 -39  -1    0.20    0.14
   9  39   1    0.05    0.13
  11 -39   1    0.27    0.13
  11  39  -1    0.47    0.17
  11  39   1    0.43    0.17
  11 -39  -1    0.41    0.15
 -11 -39   1    0.39    0.15
  13  39  -1    0.27    0.15
  13 -39   1    0.34    0.14
  13 -39  -1    0.23    0.12
  13  39   1    0.19    0.14
  15  39  -1    0.13    0.14
  15 -39   1   -0.01    0.12
  15 -39  -1    0.01    0.11
  15  39   1   -0.03    0.11
 -17  39   1    0.19    0.13
   1  41  -1    0.09    0.12
   1 -41   1   -0.04    0.10
  -1 -41  -1    0.12    0.11
  -1  41   1    0.15    0.12
   1 -41  -1    0.06    0.12
   1  41   1    0.19    0.13
  -1 -41   1   -0.05    0.10
  -1  41  -1    0.23    0.14
   3  41  -1    0.14    0.13
  -3  41   1    0.09    0.11
   3 -41   1    0.16    0.11
  -3 -41  -1    0.02    0.12
  -3  41  -1    0.08    0.12
   3 -41  -1    0.01    0.11
   3  41   1    0.07    0.12
  -3 -41   1    0.10    0.13
  -5 -41  -1    0.54    0.15
   5 -41   1    0.51    0.15
   5  41  -1    0.34    0.16
   5  41   1    0.41    0.15
  -5  41  -1    0.02    0.12
   5 -41  -1    0.30    0.14
  -5 -41   1    0.37    0.14
   7 -41   1    0.23    0.13
   7  41  -1    0.21    0.13
   7 -41  -1    0.43    0.15
  -7 -41   1    0.40    0.14
   7  41   1    0.01    0.13
   9 -41   1   -0.06    0.10
   9  41  -1    0.15    0.13
  -9 -41   1   -0.03    0.10
   9 -41  -1   -0.08    0.10
   9  41   1    0.11    0.13
  11 -41   1   -0.03    0.13
  11 -41  -1   -0.10    0.10
   2   0  -2    0.97    0.04
   4   0   2   -0.29    0.02
   4   0  -2   -0.36    0.02
   4   0   2   -0.25    0.02
   4   0  -2   -0.36    0.02
  -4   0   2   -0.27    0.02
   4   0   2   -0.28    0.02
   4   0   2   -0.31    0.02
   6   0  -2    2.16    0.09
   6   0  -2    2.22    0.09
   6   0   2    2.16    0.08
   6   0   2    2.34    0.08
   6   0  -2    2.22    0.07
   6   0   2    2.26    0.08
   6   0   2    2.17    0.08
  -6   0   2    2.17    0.08
   8   0   2   -0.13    0.02
   8   0   2   -0.15    0.02
   8   0   2   -0.13    0.03
   8   0   2   -0.10    0.02
  -8   0   2   -0.16    0.02
   8   0  -2   -0.15    0.02
   8   0  -2   -0.11    0.03
   8   0  -2   -0.12    0.02
  10   0   2   -0.01    0.02
  10   0   2    0.03    0.03
  10   0  -2    0.06    0.03
  10   0   2   -0.03    0.02
  10   0   2    0.02    0.03
 -10   0   2    0.00    0.02
  10   0  -2   -0.01    0.03
  10   0  -2    0.03    0.02
  12   0  -2   -0.03    0.03
  12   0   2   -0.03    0.03
  12   0   2   -0.01    0.03
  12   0   2   -0.02    0.03
  12   0  -2   -0.02    0.02
  12   0  -2   -0.02    0.03
 -12   0   2    0.01    0.03
  12   0   2   -0.01    0.03
  14   0   2    7.86    0.24
 -14   0   2    7.80    0.23
  14   0  -2    7.67    0.26
  14   0  -2    7.64    0.23
  14   0   2    8.01    0.25
  14   0   2    8.27    0.26
  14   0  -2    7.67    0.26
  14   0   2    8.45    0.24
  16   0   2    0.03    0.03
  16   0  -2    0.03    0.03
  16   0   2    0.04    0.04
  16   0  -2   -0.06    0.03
 -16   0   2    0.01    0.03
  16   0  -2    0.02    0.04
  16   0   2    0.03    0.04
  16   0   2    0.10    0.04
  18   0   2    3.81    0.16
 -18   0   2    3.64    0.15
  18   0   2    3.85    0.16
  18   0   2    3.85    0.18
  18   0  -2    3.86    0.18
  18   0  -2    3.69    0.15
  18   0  -2    3.77    0.19
  18   0   2    3.99    0.18
  20   0   2    0.03    0.04
  20   0  -2    0.00    0.03
  20   0  -2   -0.01    0.05
 -20   0   2    0.02    0.04
  20   0   2    0.01    0.03
  20   0   2    0.02    0.04
  20   0   2    0.01    0.04
  20   0  -2    0.02    0.05
  22   0  -2   11.58    0.35
 -22   0   2   11.90    0.35
  22   0   2   11.24    0.35
  22   0   2   11.78    0.38
  22   0  -2   11.35    0.39
  22   0  -2   11.25    0.40
  22   0   2   12.09    0.37
  22   0   2   11.24    0.38
  24   0   2    0.10    0.06
  24   0   2   -0.01    0.04
  24   0  -2    0.03    0.06
 -24   0   2   -0.08    0.04
  24   0   2    0.00    0.04
  24   0  -2    0.00    0.04
  24   0  -2    0.00    0.05
  24   0   2   -0.02    0.05
  26   0   2    5.88    0.27
 -26   0   2    5.39    0.23
  26   0  -2    5.09    0.27
  26   0  -2    5.16    0.26
  26   0   2    5.45    0.23
  26   0   2    5.07    0.26
 -26   0  -2    5.05    0.23
 -28   0  -2   -0.03    0.05
  28   0  -2   -0.02    0.06
  28   0   2    0.08    0.07
 -28   0   2    0.04    0.06
  28   0  -2   -0.02    0.06
  28   0   2    0.01    0.06
  30   0   2    1.47    0.17
 -30   0  -2    1.51    0.15
  30   0  -2    1.32    0.16
  30   0  -2    1.71    0.19
 -30   0   2    1.52    0.15
  30   0   2    1.60    0.18
  32   0  -2   -0.06    0.07
  32   0   2    0.03    0.08
  32   0  -2    0.01    0.07
  32   0   2    0.03    0.07
  34   0  -2    0.79    0.15
  34   0   2    1.10    0.17
  34   0  -2    1.11    0.17
  34   0   2    0.90    0.15
  36   0   2    0.03    0.09
  36   0  -2   -0.08    0.08
  36   0  -2    0.03    0.09
 -36   0   2    0.03    0.10
  36   0   2   -0.02    0.09
  38   0  -2    0.95    0.18
  38   0   2    1.28    0.20
 -38   0  -2    0.99    0.18
 -38   0   2    1.11    0.20
 -40   0  -2    0.05    0.12
  40   0  -2    0.16    0.11
 -40   0   2    0.02    0.13
 -42   0   2    0.56    0.17
 -42   0  -2    0.66    0.18
   2  -2   2   23.92    0.50
   2   2  -2   22.20    0.51
  -2   2   2   24.15    0.51
  -2  -2  -2   23.47    0.51
   2   2  -2   21.36    0.52
   2  -2   2   23.53    0.50
   2  -2  -2   23.59    0.50
  -2   2  -2   23.91    0.52
   2  -2  -2   23.82    0.51
  -2  -2   2   22.89    0.51
   4  -2   2   -0.34    0.02
  -4   2   2   -0.24    0.03
   4   2  -2   -0.26    0.03
   4  -2   2   -0.26    0.03
   4   2  -2   -0.32    0.03
   4  -2  -2   -0.34    0.02
   4   2   2   -0.29    0.03
  -4   2  -2   -0.32    0.02
  -4  -2   2   -0.34    0.02
   4   2   2   -0.29    0.03
   4  -2  -2   -0.32    0.02
   4   2   2   -0.28    0.02
   4   2   2   -0.29    0.02
   6  -2   2  922.82   19.12
   6  -2   2  919.33   19.26
   6   2  -2  908.26   19.11
   6   2  -2  905.57   19.37
   6  -2   2  910.98   19.14
  -6   2   2  924.48   19.15
   6  -2   2  913.02   19.74
   6   2   2  923.12   19.31
   6   2   2  945.08   19.76
   6   2   2  923.95   19.07
   6  -2  -2  932.31   19.16
   6   2   2  911.23   19.05
   6  -2  -2  898.60   19.30
   8  -2   2   -0.06    0.02
  -8   2   2   -0.07    0.02
   8  -2   2   -0.13    0.02
   8   2  -2   -0.04    0.02
   8  -2   2   -0.08    0.02
   8   2  -2   -0.06    0.03
   8   2  -2   -0.04    0.03
   8  -2   2   -0.04    0.03
   8   2   2   -0.07    0.03
   8  -2  -2   -0.05    0.02
   8   2   2   -0.07    0.02
   8   2   2   -0.08    0.02
   8   2   2   -0.02    0.03
  -8  -2   2   -0.08    0.02
   8  -2  -2   -0.04    0.03
   8  -2  -2   -0.05    0.03
  10  -2   2   37.32    0.85
  10   2  -2   37.60    0.86
  10  -2   2   37.99    0.86
  10  -2   2   38.21    0.86
 -10   2   2   37.79    0.85
  10   2  -2   38.49    0.86
  10   2  -2   37.32    0.88
  10  -2   2   38.49    0.85
  10  -2  -2   38.39    0.86
  10   2   2   38.42    0.87
 -10  -2   2   38.22    0.83
  10  -2  -2   37.83    0.84
  10   2   2   38.08    0.83
  10  -2  -2   38.02    0.87
  10   2   2   37.12    0.87
  10   2   2   38.42    0.85
  12  -2   2    0.52    0.06
 -12   2   2    0.44    0.06
  12   2  -2    0.48    0.07
  12  -2   2    0.42    0.06
  12  -2   2    0.47    0.06
  12  -2   2    0.50    0.06
  12   2  -2    0.52    0.06
  12   2  -2    0.51    0.07
  12   2   2    0.49    0.06
  12   2   2    0.63    0.07
  12   2   2    0.54    0.05
  12  -2  -2    0.48    0.05
  12  -2  -2    0.62    0.07
 -12  -2   2    0.54    0.05
  12  -2  -2    0.35    0.06
  12   2   2    0.39    0.06
  14  -2   2  244.49    5.15
  14   2  -2  246.94    5.17
  14  -2   2  246.30    5.31
  14  -2   2  242.76    5.16
  14  -2   2  241.00    5.21
  14   2  -2  256.59    5.31
  14   2  -2  244.03    5.23
 -14   2   2  246.89    5.15
  14   2   2  245.56    5.22
  14   2   2  249.68    5.33
 -14  -2   2  250.43    5.13
  14   2   2  242.82    5.16
  14  -2  -2  244.88    5.17
  14   2   2  247.41    5.14
  14  -2  -2  248.32    5.29
  14  -2  -2  247.52    5.23
  16  -2   2    0.96    0.09
  16   2  -2    0.92    0.08
  16   2  -2    0.83    0.09
  16  -2   2    0.83    0.08
  16  -2   2    0.94    0.09
  16   2  -2    0.87    0.10
 -16   2   2    0.91    0.08
  16  -2   2    0.91    0.08
  16   2   2    0.82    0.09
 -16  -2   2    0.90    0.07
  16  -2  -2    0.78    0.09
  16  -2  -2    0.88    0.07
  16  -2  -2    1.08    0.10
  16   2   2    1.03    0.09
  16   2   2    0.98    0.09
  16   2   2    0.91    0.07
  18   2  -2   39.33    0.96
  18  -2   2   37.58    0.91
  18   2  -2   38.02    0.93
  18  -2   2   39.49    0.91
  18  -2   2   38.45    0.93
 -18   2   2   38.18    0.90
  18  -2   2   37.79    0.92
  18   2  -2   38.78    0.91
  18   2   2   38.69    0.89
  18   2   2   38.27    0.93
  18  -2  -2   38.41    0.93
 -18  -2   2   38.50    0.88
  18   2   2   40.45    0.95
  18  -2  -2   37.98    0.90
  18  -2  -2   39.15    0.94
  18   2   2   37.20    0.92
 -20   2   2    0.04    0.04
  20  -2   2    0.04    0.04
  20   2  -2    0.01    0.03
  20   2  -2    0.09    0.05
  20  -2   2    0.09    0.05
  20  -2   2    0.08    0.04
  20   2  -2    0.09    0.05
  20  -2   2    0.09    0.05
  20   2   2    0.01    0.04
  20  -2  -2    0.00    0.04
 -20  -2   2    0.05    0.04
  20  -2  -2    0.01    0.03
  20   2   2    0.20    0.06
  20  -2  -2    0.05    0.05
  20   2   2    0.02    0.05
  20   2   2    0.06    0.04
 -22   2   2   98.85    2.15
  22   2  -2   96.63    2.19
  22  -2   2   95.61    2.15
  22  -2   2   94.45    2.18
  22  -2   2   95.18    2.19
  22   2  -2   97.82    2.23
  22  -2   2   98.26    2.21
  22   2  -2  100.53    2.20
  22  -2  -2  100.33    2.18
  22   2   2   96.28    2.21
 -22  -2   2   98.85    2.13
  22  -2  -2  100.05    2.22
  22   2   2   97.83    2.18
  22   2   2   97.21    2.14
  22  -2  -2   97.47    2.19
  22   2   2  102.03    2.23
  24  -2   2    0.18    0.06
  24   2  -2    0.12    0.07
  24  -2   2    0.21    0.07
  24   2  -2    0.20    0.06
 -24   2   2    0.03    0.05
  24  -2   2    0.10    0.06
  24   2  -2    0.19    0.07
  24  -2   2    0.23    0.07
  24  -2  -2    0.26    0.08
  24   2   2    0.19    0.06
  24  -2  -2    0.26    0.06
  24  -2  -2    0.07    0.07
  24   2   2    0.25    0.07
 -24  -2   2    0.18    0.06
  24   2   2    0.20    0.07
  24   2   2    0.09    0.07
 -26  -2  -2   19.64    0.56
  26   2  -2   21.43    0.64
  26   2  -2   20.49    0.57
  26  -2   2   19.28    0.56
  26  -2   2   19.12    0.59
  26   2  -2   19.85    0.61
  26  -2   2   21.00    0.61
 -26   2   2   20.56    0.57
  26   2   2   19.09    0.59
 -26  -2   2   20.67    0.55
  26   2   2   19.63    0.58
  26  -2  -2   21.28    0.63
  26   2   2   21.10    0.62
 -26   2  -2   19.10    0.57
  26  -2  -2   20.62    0.62
 -28  -2  -2    0.25    0.07
  28   2  -2    0.33    0.09
  28  -2   2    0.17    0.08
  28   2  -2    0.10    0.08
 -28   2   2    0.16    0.07
  28  -2   2    0.12    0.07
  28   2   2    0.18    0.07
  28   2   2    0.14    0.07
  28  -2  -2    0.15    0.08
 -28   2  -2    0.16    0.07
 -28  -2   2    0.21    0.07
  28  -2  -2    0.19    0.08
  28   2   2    0.20    0.08
  30  -2   2   42.16    1.12
  30   2  -2   43.60    1.13
  30  -2   2   41.48    1.12
  30   2  -2   43.96    1.16
 -30   2   2   43.88    1.08
  30  -2  -2   42.91    1.14
  30   2   2   43.66    1.15
  30   2   2   42.11    1.11
 -30   2  -2   43.18    1.08
  30  -2  -2   42.69    1.13
 -32   2   2    0.06    0.07
  32   2  -2    0.03    0.08
  32  -2   2    0.10    0.08
  32  -2   2    0.06    0.08
 -32  -2   2    0.18    0.10
  32  -2  -2    0.08    0.07
  32   2   2    0.07    0.07
  32  -2  -2    0.00    0.07
 -32   2  -2   -0.03    0.06
  32   2   2    0.00    0.07
 -34  -2  -2    6.70    0.35
  34  -2   2    5.99    0.33
  34   2  -2    7.22    0.37
  34  -2   2    7.11    0.36
  34  -2  -2    7.01    0.36
 -34  -2   2    7.15    0.37
  34   2   2    7.02    0.36
  34  -2  -2    6.62    0.35
 -36  -2  -2    0.02    0.10
  36  -2   2    0.04    0.09
  36   2  -2    0.16    0.10
  36  -2  -2    0.00    0.09
  36  -2  -2    0.07    0.09
 -36  -2   2   -0.10    0.10
  36   2   2    0.15    0.10
 -38  -2  -2   12.73    0.54
  38  -2   2   11.95    0.52
  38   2  -2   12.78    0.55
  38   2   2   13.11    0.55
  38  -2  -2   13.22    0.54
  38  -2  -2   13.68    0.56
 -38  -2   2   14.12    0.57
 -40  -2  -2    0.12    0.13
  40  -2   2    0.31    0.13
 -40   2   2    0.08    0.13
  40   2  -2    0.05    0.11
  40   2   2    0.27    0.12
 -40  -2   2    0.13    0.13
 -42  -2  -2    4.07    0.33
  42   2  -2    4.11    0.34
 -42   2   2    4.37    0.35
 -42   2  -2    4.57    0.35
 -42  -2   2    4.54    0.35
   0  -4   2   -0.35    0.01
   0   4  -2   -0.31    0.02
   0  -4   2   -0.33    0.02
   0   4   2   -0.30    0.02
   0   4   2   -0.33    0.02
   0  -4  -2   -0.34    0.02
   0  -4  -2   -0.32    0.02
  -2  -4  -2   -0.26    0.02
  -2   4   2   -0.22    0.03
   2   4  -2   -0.29    0.03
   2   4  -2   -0.33    0.02
  -2  -4  -2   -0.25    0.03
  -2   4   2   -0.25    0.03
   2  -4   2   -0.25    0.03
   2  -4   2   -0.27    0.03
   2   4   2   -0.28    0.03
  -2  -4   2   -0.28    0.03
  -2   4  -2   -0.26    0.03
   2  -4  -2   -0.30    0.03
   2  -4  -2   -0.30    0.02
   2   4   2   -0.26    0.02
  -4   4   2   -0.06    0.02
   4   4  -2   -0.04    0.02
   4  -4   2   -0.05    0.02
  -4  -4  -2   -0.08    0.02
   4  -4   2   -0.06    0.02
   4   4  -2   -0.04    0.03
   4  -4  -2   -0.06    0.02
   4   4   2   -0.07    0.01
  -4  -4   2   -0.08    0.02
   4   4   2   -0.06    0.02
   4   4   2   -0.07    0.02
   4  -4  -2   -0.08    0.02
  -4   4  -2   -0.07    0.02
  -6  -4  -2    1.15    0.06
  -6   4   2    1.27    0.05
   6  -4   2    1.13    0.07
   6  -4   2    1.01    0.07
   6  -4   2    1.15    0.05
   6   4  -2    1.20    0.07
  -6   4   2    1.16    0.07
   6   4  -2    1.06    0.07
  -6   4  -2    1.21    0.07
   6   4   2    1.07    0.07
   6  -4  -2    1.06    0.07
  -6  -4   2    1.26    0.07
   6   4   2    1.15    0.07
   6   4   2    1.13    0.05
   6  -4  -2    1.22    0.06
  -8  -4  -2   -0.10    0.02
   8   4  -2   -0.06    0.02
  -8   4   2   -0.08    0.02
  -8   4   2   -0.10    0.02
   8  -4   2   -0.11    0.02
   8   4  -2   -0.06    0.03
   8  -4   2   -0.10    0.03
   8  -4   2   -0.08    0.02
  -8   4  -2   -0.08    0.02
   8   4   2   -0.09    0.02
   8  -4  -2   -0.12    0.02
  -8  -4   2   -0.09    0.03
   8   4   2   -0.04    0.03
   8   4   2   -0.12    0.02
   8  -4  -2   -0.09    0.02
  -8  -4   2   -0.08    0.01
  10  -4   2    1.57    0.09
 -10   4   2    1.58    0.09
 -10   4   2    1.51    0.07
  10   4  -2    1.58    0.08
  10  -4   2    1.56    0.08
  10   4  -2    1.43    0.09
  10  -4   2    1.48    0.09
  10   4   2    1.46    0.09
  10  -4  -2    1.65    0.10
 -10  -4   2    1.41    0.06
  10  -4  -2    1.51    0.08
  10   4   2    1.57    0.07
  10   4   2    1.77    0.09
 -10  -4   2    1.57    0.10
  12   4  -2    0.03    0.03
 -12   4   2   -0.04    0.03
  12  -4   2   -0.03    0.03
  12  -4   2   -0.05    0.03
  12  -4   2    0.00    0.04
 -12   4   2    0.02    0.02
  12   4  -2    0.02    0.04
  12  -4   2    0.00    0.03
 -12  -4   2    0.00    0.04
  12   4   2    0.00    0.02
  12   4   2   -0.02    0.03
  12  -4  -2    0.05    0.03
  12   4   2    0.01    0.03
 -12  -4   2   -0.01    0.02
  12   4   2   -0.03    0.03
  12  -4  -2    0.01    0.04
 -14   4   2   26.28    0.62
  14  -4   2   25.27    0.62
  14   4  -2   23.98    0.64
  14  -4   2   25.88    0.61
  14  -4   2   25.75    0.63
  14   4  -2   25.68    0.62
  14   4  -2   25.71    0.63
  14  -4   2   24.37    0.61
  14  -4  -2   26.12    0.59
 -14  -4   2   25.25    0.58
  14   4   2   25.14    0.58
  14   4   2   24.80    0.64
  14   4   2   25.46    0.62
  14  -4  -2   25.12    0.63
 -14  -4   2   25.69    0.64
  14   4   2   25.84    0.63
  16  -4   2    0.54    0.07
  16  -4   2    0.62    0.08
  16  -4   2    0.76    0.09
  16   4  -2    0.58    0.09
  16  -4   2    0.68    0.07
  16   4  -2    0.50    0.08
  16   4  -2    0.66    0.07
 -16   4   2    0.55    0.07
  16   4   2    0.64    0.06
 -16  -4   2    0.62    0.06
  16  -4  -2    0.59    0.06
  16   4   2    0.54    0.07
  16  -4  -2    0.68    0.09
  16   4   2    0.64    0.08
  16   4   2    0.61    0.08
  16  -4  -2    0.62    0.08
  18   4  -2    7.43    0.24
 -18   4   2    6.92    0.25
  18   4  -2    7.15    0.28
  18  -4   2    6.74    0.25
  18   4  -2    7.01    0.26
  18  -4   2    6.75    0.25
  18  -4   2    7.36    0.23
  18  -4   2    7.12    0.26
  18  -4  -2    6.84    0.26
  18  -4  -2    7.36    0.22
  18   4   2    7.24    0.26
  18   4   2    6.90    0.27
 -18  -4   2    7.10    0.22
  18  -4  -2    6.75    0.26
  18   4   2    7.16    0.22
  18   4   2    7.13    0.25
 -20   4   2    0.14    0.06
  20  -4   2    0.21    0.06
  20   4  -2    0.26    0.07
  20  -4   2    0.19    0.05
  20  -4   2    0.09    0.05
  20   4  -2    0.16    0.05
  20   4  -2    0.22    0.07
  20  -4   2    0.16    0.06
  20  -4  -2    0.15    0.04
  20  -4  -2    0.05    0.05
  20   4   2    0.11    0.05
  20  -4  -2    0.14    0.06
  20   4   2    0.20    0.05
 -20  -4   2    0.13    0.04
  20   4   2    0.09    0.05
  20   4   2    0.16    0.06
  22  -4   2    0.35    0.08
  22  -4   2    0.45    0.07
  22   4  -2    0.38    0.09
  22   4  -2    0.36    0.08
  22   4  -2    0.36    0.07
  22  -4   2    0.47    0.08
 -22   4   2    0.44    0.08
  22  -4   2    0.37    0.08
  22   4   2    0.41    0.07
  22  -4  -2    0.59    0.07
  22  -4  -2    0.36    0.09
  22   4   2    0.39    0.09
  22   4   2    0.30    0.07
 -22  -4   2    0.42    0.07
  22   4   2    0.57    0.09
  22  -4  -2    0.54    0.09
  24   4  -2    0.02    0.06
  24  -4   2    0.01    0.05
  24  -4   2   -0.01    0.05
  24  -4   2    0.07    0.05
 -24   4   2    0.03    0.06
  24   4  -2    0.07    0.05
 -24  -4   2    0.01    0.06
 -24  -4   2    0.00    0.04
  24  -4  -2    0.04    0.05
  24  -4  -2    0.13    0.06
  24   4   2    0.03    0.05
 -24   4  -2    0.07    0.06
  24   4   2    0.07    0.05
  24   4   2   -0.03    0.05
  24   4   2    0.02    0.05
  26   4  -2    0.30    0.09
 -26  -4  -2    0.44    0.08
  26   4  -2    0.15    0.06
 -26   4   2    0.33    0.08
  26  -4   2    0.29    0.08
  26  -4   2    0.23    0.08
  26   4   2    0.07    0.07
 -26  -4   2    0.26    0.09
 -26   4  -2    0.21    0.07
  26   4   2    0.14    0.07
  26   4   2    0.20    0.08
  26  -4  -2    0.25    0.09
  26  -4  -2    0.30    0.09
 -28  -4  -2    0.10    0.08
  28   4  -2    0.22    0.09
  28  -4   2    0.19    0.08
  28  -4   2    0.07    0.07
 -28   4   2    0.08    0.07
  28   4   2    0.02    0.07
 -28   4  -2    0.12    0.07
  28   4   2    0.08    0.06
 -28  -4   2    0.06    0.08
  28  -4  -2    0.09    0.08
  28  -4  -2    0.25    0.09
  30  -4   2    1.06    0.14
 -30   4   2    0.93    0.13
  30   4  -2    0.93    0.16
 -30  -4  -2    1.23    0.16
  30  -4   2    1.12    0.15
  30   4   2    1.14    0.16
  30  -4  -2    0.72    0.13
 -30  -4   2    1.01    0.16
 -30   4  -2    1.26    0.15
  30  -4  -2    0.75    0.13
  32   4  -2   -0.04    0.08
  32  -4   2    0.18    0.09
 -32  -4  -2    0.01    0.08
  32  -4   2    0.05    0.07
 -32   4   2    0.08    0.08
  32   4   2    0.04    0.08
  32  -4  -2   -0.01    0.08
 -32  -4   2    0.02    0.09
 -32   4  -2   -0.10    0.07
  32  -4  -2    0.06    0.07
 -34  -4  -2    2.34    0.24
  34  -4   2    2.10    0.22
  34   4  -2    2.03    0.23
 -34   4   2    1.94    0.20
 -34  -4   2    2.34    0.24
  34   4   2    1.97    0.22
 -34   4  -2    2.08    0.20
  34  -4  -2    2.29    0.23
  34  -4  -2    2.31    0.23
 -36  -4  -2    0.33    0.13
  36  -4   2    0.29    0.11
  36   4  -2    0.32    0.13
  36   4   2    0.15    0.11
  36  -4  -2    0.26    0.11
  36  -4  -2    0.21    0.11
 -36  -4   2    0.26    0.13
 -38  -4  -2    0.27    0.13
  38   4  -2    0.24    0.12
  38  -4   2    0.29    0.13
  38  -4  -2    0.16    0.12
  38   4   2    0.38    0.13
 -38  -4   2    0.52    0.16
 -40  -4  -2    0.07    0.13
  40  -4   2    0.02    0.10
  40   4  -2    0.02    0.12
  40  -4  -2    0.17    0.12
  40   4   2    0.33    0.15
 -40  -4   2    0.05    0.13
  42  -4   2    0.43    0.14
  42   4  -2    0.46    0.16
  42   4   2    0.38    0.15
  42  -4  -2    0.33    0.14
 -42  -4   2    0.39    0.15
   0   6  -2    1.17    0.05
   0   6   2    1.20    0.07
   0  -6  -2    1.17    0.06
   0  -6  -2    1.19    0.06
   0   6   2    1.08    0.06
   0  -6   2    1.06    0.06
   0  -6   2    1.04    0.05
   2   6  -2  939.57   19.55
  -2  -6  -2  938.37   19.61
   2  -6   2  904.11   19.39
  -2  -6  -2  931.65   19.35
   2  -6   2  938.12   19.44
   2   6  -2  912.63   20.24
   2   6   2  880.34   19.34
   2  -6  -2  943.55   19.56
  -2   6  -2  943.58   20.12
   2  -6  -2  936.65   19.41
   2   6   2 1000.00   20.18
  -2  -6   2  921.16   19.42
   4   6  -2    0.64    0.05
  -4  -6  -2    0.60    0.05
   4  -6   2    0.47    0.05
   4   6  -2    0.60    0.06
   4  -6   2    0.68    0.05
  -4   6   2    0.53    0.05
  -4   6   2    0.49    0.05
  -4   6  -2    0.60    0.05
   4  -6  -2    0.61    0.05
   4  -6  -2    0.58    0.05
   4   6   2    0.69    0.06
   4   6   2    0.62    0.06
   4   6   2    0.54    0.03
  -4  -6   2    0.64    0.06
   6  -6   2   55.25    1.23
   6  -6   2   55.18    1.23
  -6  -6  -2   56.98    1.22
  -6   6   2   58.51    1.24
   6  -6   2   57.48    1.20
   6   6  -2   56.81    1.25
  -6   6   2   56.88    1.23
   6   6  -2   59.33    1.28
  -6   6  -2   58.07    1.26
   6  -6  -2   56.84    1.22
   6   6   2   56.98    1.27
   6  -6  -2   55.81    1.23
   6   6   2   55.68    1.25
   6   6   2   53.81    1.19
  -6  -6   2   56.43    1.24
  -8   6   2    0.21    0.03
   8  -6   2    0.17    0.03
  -8   6   2    0.17    0.04
   8  -6   2    0.20    0.04
  -8  -6  -2    0.21    0.04
   8   6  -2    0.21    0.05
   8  -6   2    0.15    0.04
   8   6  -2    0.17    0.04
   8   6   2    0.22    0.04
   8   6   2    0.19    0.04
   8  -6  -2    0.17    0.03
  -8  -6   2    0.16    0.04
   8  -6  -2    0.17    0.04
   8   6   2    0.19    0.03
  -8   6  -2    0.16    0.03
  10  -6   2  150.68    3.24
  10  -6   2  152.04    3.24
  10  -6   2  152.30    3.23
  10   6  -2  161.74    3.34
  10   6  -2  149.19    3.28
 -10   6   2  152.76    3.24
 -10  -6  -2  152.18    3.22
 -10   6   2  157.32    3.30
  10   6   2  155.10    3.34
  10   6   2  150.71    3.19
 -10  -6   2  151.89    3.24
 -10  -6   2  152.65    3.17
  10   6   2  153.98    3.28
 -10   6  -2  152.46    3.32
  10  -6  -2  155.33    3.25
 -12   6   2    0.77    0.06
  12  -6   2    0.97    0.09
  12  -6   2    0.97    0.08
  12   6  -2    0.59    0.08
  12   6  -2    0.91    0.08
  12  -6   2    0.88    0.07
 -12   6   2    0.86    0.08
 -12   6  -2    0.82    0.07
  12  -6  -2    0.83    0.07
  12   6   2    0.97    0.10
  12  -6  -2    0.78    0.08
  12   6   2    0.95    0.08
 -12  -6   2    0.59    0.07
 -12  -6   2    0.78    0.05
  12   6   2    0.91    0.06
  14   6  -2  211.56    4.59
 -14  -6  -2  206.49    4.52
  14   6  -2  228.78    4.67
 -14   6   2  218.03    4.53
  14  -6   2  210.99    4.53
  14  -6   2  208.77    4.54
  14  -6   2  212.88    4.54
 -14   6   2  219.21    4.63
  14   6   2  211.51    4.47
  14   6   2  211.26    4.59
  14   6   2  220.77    4.68
  14  -6  -2  212.04    4.54
  14  -6  -2  218.04    4.57
 -14  -6   2  220.29    4.47
 -14   6  -2  216.45    4.65
 -14  -6   2  215.65    4.54
  16   6  -2    0.26    0.07
  16  -6   2    0.21    0.05
 -16   6   2    0.27    0.06
 -16  -6  -2    0.35    0.06
  16  -6   2    0.24    0.06
  16  -6   2    0.30    0.06
 -16   6   2    0.38    0.05
  16   6  -2    0.31    0.06
  16   6   2    0.31    0.07
 -16   6  -2    0.36    0.06
  16  -6  -2    0.28    0.06
 -16  -6   2    0.25    0.06
  16   6   2    0.34    0.06
  16   6   2    0.35    0.05
 -16  -6   2    0.26    0.04
  16  -6  -2    0.26    0.06
  18   6  -2   58.43    1.39
 -18   6   2   60.50    1.34
  18  -6   2   58.09    1.34
  18  -6   2   57.99    1.35
  18  -6   2   57.88    1.34
 -18  -6  -2   57.87    1.34
 -18   6   2   59.12    1.32
  18   6  -2   59.30    1.36
  18   6   2   56.71    1.28
 -18  -6   2   59.83    1.36
  18  -6  -2   59.13    1.36
 -18  -6   2   58.39    1.27
  18   6   2   60.29    1.38
  18   6   2   57.96    1.37
 -18   6  -2   59.48    1.35
  18  -6  -2   57.54    1.36
 -20   6   2    0.06    0.04
  20   6  -2    0.13    0.05
  20  -6   2    0.15    0.06
 -20  -6  -2    0.10    0.06
 -20   6   2    0.02    0.05
  20   6  -2    0.11    0.06
  20  -6   2    0.05    0.04
  20  -6   2    0.14    0.06
 -20  -6   2    0.10    0.06
  20   6   2    0.17    0.07
  20   6   2    0.08    0.04
  20   6   2    0.06    0.05
 -20   6  -2    0.06    0.05
 -20  -6   2    0.17    0.04
  20  -6  -2   -0.02    0.05
  20  -6  -2    0.16    0.06
  22  -6   2   67.18    1.62
  22   6  -2   71.37    1.63
  22   6  -2   72.52    1.67
  22  -6   2   69.33    1.60
 -22  -6  -2   67.23    1.60
 -22   6   2   70.58    1.60
  22  -6   2   72.28    1.61
 -22  -6   2   69.60    1.53
  22  -6  -2   70.33    1.63
  22   6   2   71.83    1.66
 -22   6  -2   71.05    1.61
  22  -6  -2   69.70    1.63
 -22  -6   2   70.04    1.62
  22   6   2   68.98    1.54
  22   6   2   68.75    1.64
  24   6  -2    0.55    0.09
 -24   6   2    0.67    0.10
 -24  -6  -2    0.46    0.09
  24   6  -2    0.56    0.11
  24  -6   2    0.68    0.10
  24  -6   2    0.52    0.10
 -24   6  -2    0.54    0.10
  24   6   2    0.70    0.08
  24  -6  -2    0.78    0.12
  24   6   2    0.52    0.10
 -24   6  -2    0.57    0.09
  24   6   2    0.62    0.12
  24  -6  -2    0.46    0.09
 -24  -6   2    0.67    0.11
  26  -6   2   28.12    0.79
 -26   6   2   29.60    0.77
  26  -6   2   28.75    0.77
  26   6  -2   28.73    0.82
  26   6  -2   29.41    0.77
 -26  -6  -2   28.01    0.78
  26   6   2   28.24    0.81
  26  -6  -2   29.65    0.80
  26   6   2   27.92    0.78
 -26   6  -2   28.51    0.77
 -26  -6   2   28.55    0.80
  26  -6  -2   28.34    0.80
 -28  -6  -2    0.89    0.13
  28  -6   2    0.79    0.12
  28   6  -2    0.83    0.14
  28   6  -2    0.64    0.10
 -28   6   2    0.81    0.12
  28  -6   2    0.80    0.13
 -28   6  -2    0.65    0.12
  28  -6  -2    0.58    0.11
  28  -6  -2    0.31    0.10
 -28  -6   2    0.55    0.12
  28   6   2    0.91    0.13
  28   6   2    0.74    0.13
 -30   6   2   19.79    0.61
  30  -6   2   20.15    0.62
 -30  -6  -2   20.20    0.64
  30   6  -2   20.75    0.67
  30  -6   2   18.80    0.63
 -30   6  -2   19.73    0.61
  30  -6  -2   20.27    0.65
  30   6   2   18.76    0.61
  30  -6  -2   20.91    0.64
 -30  -6   2   20.67    0.65
  30   6   2   20.30    0.66
  32   6  -2   -0.09    0.08
  32  -6   2    0.00    0.08
 -32  -6  -2    0.13    0.09
 -32   6   2    0.14    0.09
  32  -6  -2   -0.06    0.07
 -32  -6   2   -0.12    0.07
  32   6   2   -0.14    0.06
 -32   6  -2    0.01    0.08
  32  -6  -2   -0.10    0.06
  34  -6   2   12.05    0.49
  34   6  -2   12.93    0.53
 -34   6   2   11.58    0.46
 -34  -6  -2   12.71    0.49
  34   6   2   12.08    0.51
 -34  -6   2   12.31    0.50
  34  -6  -2   12.56    0.50
 -34   6  -2   11.90    0.46
 -36  -6  -2    0.01    0.10
  36  -6   2    0.09    0.09
  36   6  -2    0.06    0.10
 -36   6   2   -0.07    0.08
  36  -6  -2   -0.15    0.08
  36   6   2    0.06    0.09
 -36   6  -2    0.11    0.10
 -36  -6   2   -0.02    0.10
 -38  -6  -2   10.93    0.49
  38  -6   2   10.82    0.49
  38   6  -2   11.52    0.53
 -38  -6   2   11.49    0.51
  38  -6  -2   11.29    0.50
  38   6   2   10.76    0.51
  40   6  -2    0.03    0.11
  40  -6   2    0.18    0.12
 -40  -6   2    0.14    0.14
  40   6   2    0.14    0.12
  40  -6  -2    0.04    0.11
  42   6  -2    2.13    0.27
  42  -6   2    1.70    0.23
 -42  -6   2    1.89    0.26
  42  -6  -2    1.98    0.25
  42   6   2    2.77    0.30
   0   8   2   -0.03    0.03
   0  -8   2   -0.08    0.03
   0  -8  -2   -0.07    0.02
   0  -8  -2   -0.06    0.03
   0   8   2   -0.10    0.02
   0  -8   2   -0.09    0.02
   0  -8   2   -0.11    0.02
   0   8  -2   -0.08    0.03
  -2  -8  -2   -0.12    0.03
  -2   8   2   -0.04    0.04
   2   8  -2   -0.11    0.03
   2   8  -2   -0.12    0.02
   2   8  -2   -0.13    0.03
   2  -8   2   -0.09    0.03
  -2  -8  -2   -0.12    0.03
  -2   8   2   -0.06    0.03
   2  -8   2   -0.04    0.04
   2  -8   2   -0.09    0.02
  -2  -8   2   -0.09    0.03
   2   8   2   -0.05    0.04
   2  -8  -2   -0.15    0.02
   2   8   2   -0.13    0.02
   2  -8  -2   -0.12    0.03
  -2   8  -2    0.00    0.04
   4   8  -2   -0.12    0.02
   4  -8   2   -0.10    0.02
   4   8  -2   -0.09    0.03
   4  -8   2   -0.08    0.02
  -4   8   2   -0.09    0.03
   4  -8   2   -0.11    0.03
  -4   8   2   -0.10    0.03
  -4  -8  -2   -0.12    0.02
   4   8   2   -0.12    0.03
   4  -8  -2   -0.08    0.02
  -4  -8   2   -0.09    0.03
   4  -8  -2   -0.10    0.03
   4   8   2   -0.09    0.02
  -4   8  -2   -0.09    0.03
   4   8   2   -0.10    0.03
   6   8  -2    0.28    0.06
   6  -8   2    0.13    0.04
   6  -8   2    0.19    0.02
  -6   8   2    0.18    0.04
  -6   8   2    0.18    0.04
   6  -8   2    0.22    0.04
   6   8  -2    0.23    0.05
  -6  -8  -2    0.30    0.04
  -6  -8   2    0.13    0.04
  -6   8  -2    0.24    0.04
   6  -8  -2    0.19    0.03
   6  -8  -2    0.21    0.04
   6   8   2    0.21    0.03
   6   8   2    0.24    0.05
   6   8   2    0.24    0.04
  -8   8   2    1.19    0.08
  -8  -8  -2    1.29    0.08
   8   8  -2    1.27    0.09
   8  -8   2    1.46    0.06
   8   8  -2    1.30    0.09
  -8   8   2    1.37    0.07
   8  -8   2    1.27    0.09
   8  -8   2    1.41    0.09
   8   8   2    1.35    0.06
   8   8   2    1.34    0.09
   8  -8  -2    1.31    0.09
   8   8   2    1.45    0.09
  -8   8  -2    1.25    0.08
  -8  -8   2    1.24    0.09
   8  -8  -2    1.24    0.07
  10   8  -2    3.02    0.14
  10  -8   2    2.88    0.11
 -10   8   2    2.66    0.10
  10  -8   2    2.98    0.13
 -10   8   2    2.75    0.13
  10   8  -2    2.66    0.13
 -10  -8  -2    2.92    0.13
  10  -8   2    2.81    0.14
 -10  -8   2    2.83    0.14
  10   8   2    2.78    0.14
  10   8   2    2.65    0.09
  10   8   2    3.13    0.14
  10  -8  -2    2.65    0.11
  10  -8  -2    2.86    0.14
 -12   8   2    0.49    0.07
  12  -8   2    0.45    0.06
  12   8  -2    0.51    0.07
  12  -8   2    0.50    0.07
  12  -8   2    0.45    0.05
  12   8  -2    0.62    0.08
 -12  -8  -2    0.39    0.06
 -12   8   2    0.55    0.05
  12   8   2    0.45    0.06
 -12   8  -2    0.53    0.06
  12  -8  -2    0.50    0.06
  12   8   2    0.54    0.08
  12  -8  -2    0.54    0.07
 -12  -8   2    0.51    0.07
 -12  -8   2    0.60    0.03
  12   8   2    0.53    0.04
 -14   8   2    8.66    0.24
  14  -8   2    8.19    0.25
  14  -8   2    8.53    0.28
 -14  -8  -2    8.48    0.27
  14   8  -2    8.88    0.30
  14   8  -2    8.60    0.28
  14  -8   2    8.59    0.29
 -14   8   2    8.72    0.28
 -14   8  -2    8.46    0.26
 -14  -8   2    8.25    0.21
  14   8   2    8.57    0.28
  14  -8  -2    8.67    0.29
  14  -8  -2    8.51    0.27
  14   8   2    8.86    0.22
  14   8   2    8.45    0.29
 -14  -8   2    8.20    0.28
 -16  -8  -2    0.54    0.08
  16  -8   2    0.64    0.09
  16   8  -2    0.59    0.09
  16  -8   2    0.66    0.07
 -16   8   2    0.72    0.06
  16   8  -2    0.67    0.08
  16  -8   2    0.51    0.08
 -16   8   2    0.74    0.09
 -16   8  -2    0.69    0.07
  16   8   2    0.69    0.09
 -16  -8   2    0.70    0.09
  16   8   2    0.78    0.09
  16   8   2    0.68    0.05
  16  -8  -2    0.72    0.09
 -16  -8   2    0.71    0.05
  16  -8  -2    0.69    0.08
  18   8  -2    1.80    0.12
  18  -8   2    1.86    0.13
 -18   8   2    1.95    0.13
  18  -8   2    1.79    0.11
  18   8  -2    1.56    0.13
 -18  -8  -2    2.17    0.13
 -18   8   2    1.62    0.09
  18  -8   2    1.72    0.13
  18   8   2    1.84    0.09
  18  -8  -2    1.84    0.13
 -18   8  -2    1.88    0.11
  18   8   2    1.52    0.13
 -18  -8   2    1.89    0.08
  18   8   2    1.96    0.13
  18  -8  -2    1.62    0.13
 -18  -8   2    1.86    0.13
  20   8  -2    0.54    0.10
 -20   8   2    0.77    0.10
 -20   8   2    0.56    0.07
  20  -8   2    0.69    0.10
 -20  -8  -2    0.59    0.09
  20  -8   2    0.70    0.09
  20   8  -2    0.81    0.10
  20  -8   2    0.71    0.10
 -20  -8   2    0.60    0.10
  20   8   2    0.69    0.11
  20  -8  -2    0.52    0.09
  20  -8  -2    0.64    0.09
  20   8   2    0.57    0.06
 -20   8  -2    0.59    0.08
  20   8   2    0.96    0.11
  22   8  -2    1.43    0.12
  22   8  -2    1.53    0.16
  22  -8   2    1.56    0.15
 -22  -8  -2    1.68    0.14
 -22   8   2    1.48    0.13
  22  -8   2    1.78    0.13
  22   8   2    1.54    0.13
  22  -8  -2    1.59    0.13
 -22   8  -2    1.55    0.12
  22  -8  -2    1.29    0.15
  22   8   2    1.74    0.17
 -22  -8   2    1.72    0.15
 -22   8  -2    1.37    0.14
 -24   8   2    0.29    0.08
 -24  -8  -2    0.20    0.08
  24  -8   2    0.10    0.06
  24   8  -2    0.10    0.06
  24  -8   2    0.21    0.08
  24   8  -2    0.29    0.09
  24  -8  -2    0.16    0.07
 -24  -8   2    0.35    0.09
 -24   8  -2    0.13    0.07
  24   8   2    0.06    0.07
  24  -8  -2    0.35    0.09
  24   8   2    0.24    0.09
 -26   8   2    0.74    0.12
  26   8  -2    1.04    0.13
  26  -8   2    0.82    0.13
 -26  -8  -2    1.12    0.14
  26   8  -2    1.00    0.15
  26  -8   2    0.79    0.11
 -26  -8   2    0.98    0.14
  26  -8  -2    1.05    0.14
  26  -8  -2    0.90    0.13
  26   8   2    1.13    0.15
 -26   8  -2    0.99    0.13
  26   8   2    1.00    0.13
 -28  -8  -2    0.06    0.07
  28  -8   2    0.13    0.08
  28   8  -2    0.01    0.06
 -28   8   2    0.09    0.07
  28   8  -2    0.14    0.08
  28  -8  -2    0.00    0.06
  28   8   2    0.06    0.07
 -28  -8   2    0.12    0.09
  28  -8  -2    0.10    0.07
  28   8   2    0.06    0.08
 -28   8  -2    0.15    0.08
 -30   8   2    4.06    0.24
  30   8  -2    3.44    0.26
 -30  -8  -2    3.77    0.24
  30  -8   2    4.65    0.27
 -30   8  -2    4.07    0.24
  30   8   2    3.59    0.25
  30  -8  -2    3.51    0.24
  30  -8  -2    3.54    0.23
  30   8   2    4.30    0.24
 -30  -8   2    3.18    0.24
 -32   8   2    0.05    0.08
  32   8  -2    0.00    0.08
 -32  -8  -2    0.06    0.08
  32  -8   2   -0.02    0.07
 -32  -8   2    0.15    0.10
  32  -8  -2    0.01    0.08
 -32   8  -2   -0.03    0.07
  32   8   2    0.05    0.09
  34   8  -2    2.39    0.25
 -34  -8  -2    2.64    0.23
 -34   8   2    2.73    0.23
  34  -8   2    2.27    0.23
  34   8   2    2.54    0.26
 -34   8  -2    2.68    0.22
  34  -8  -2    2.16    0.23
 -34  -8   2    2.62    0.26
 -36  -8  -2    0.10    0.10
 -36   8   2    0.09    0.10
  36   8  -2    0.05    0.09
  36  -8   2    0.14    0.10
  36   8   2    0.18    0.11
  36  -8  -2    0.09    0.10
 -36  -8   2    0.07    0.11
 -36   8  -2    0.09    0.10
  38  -8   2    0.97    0.18
 -38  -8  -2    0.84    0.18
  38   8  -2    0.87    0.19
 -38   8   2    1.08    0.18
 -38   8  -2    1.09    0.17
  38  -8  -2    0.88    0.17
 -38  -8   2    1.06    0.19
  38   8   2    1.12    0.20
  40  -8   2    0.06    0.11
  40   8  -2    0.26    0.13
 -40  -8   2    0.14    0.13
  40   8   2   -0.01    0.10
  40  -8  -2    0.05    0.10
  42   8  -2    0.90    0.20
  42  -8   2    1.05    0.19
 -42  -8   2    0.98    0.20
  42   8   2    0.73    0.19
   0  10   2    0.05    0.03
   0 -10   2    0.09    0.03
   0  10   2    0.02    0.03
   0  10  -2    0.05    0.04
   0 -10  -2    0.09    0.03
   0  10  -2    0.02    0.03
   0 -10  -2    0.13    0.04
   0 -10   2    0.10    0.04
  -2 -10  -2   33.39    0.76
   2  10  -2   33.61    0.74
   2 -10   2   33.43    0.78
  -2  10   2   34.86    0.80
   2 -10   2   34.20    0.75
   2 -10   2   33.04    0.76
  -2  10   2   34.14    0.77
   2  10  -2   33.50    0.76
  -2 -10  -2   33.91    0.78
   2  10  -2   33.63    0.82
   2  10   2   36.36    0.81
  -2 -10   2   33.95    0.78
  -2  10  -2   34.93    0.81
   2 -10  -2   33.80    0.77
   2 -10  -2   34.89    0.77
   2  10   2   31.12    0.75
  -4  10   2    0.84    0.07
  -4 -10  -2    0.87    0.07
   4 -10   2    1.03    0.05
  -4 -10  -2    0.91    0.07
   4 -10   2    0.79    0.06
   4 -10   2    1.18    0.08
  -4  10   2    0.83    0.07
   4  10  -2    0.91    0.08
   4  10  -2    0.91    0.07
   4  10  -2    0.65    0.04
   4  10   2    0.95    0.05
   4 -10  -2    1.05    0.06
   4 -10  -2    0.97    0.07
  -4  10  -2    0.90    0.07
   4  10   2    0.84    0.08
  -4 -10   2    0.85    0.07
  -6  10   2  217.08    4.56
   6 -10   2  212.89    4.41
   6 -10   2  206.31    4.41
  -6 -10  -2  210.98    4.40
   6  10  -2  195.61    4.58
   6 -10   2  209.57    4.42
   6  10  -2  208.42    4.45
  -6  10   2  208.64    4.42
  -6  10  -2  223.34    4.56
   6 -10  -2  218.17    4.43
   6  10   2  205.14    4.45
   6  10   2  220.47    4.58
   6  10   2  205.07    4.38
  -6 -10   2  213.01    4.42
   6 -10  -2  206.81    4.42
  -8  10   2    4.45    0.17
   8 -10   2    4.48    0.18
   8 -10   2    4.58    0.17
   8  10  -2    4.60    0.19
  -8  10   2    4.71    0.16
   8  10  -2    4.29    0.18
   8 -10   2    4.72    0.13
  -8 -10  -2    4.35    0.16
   8 -10  -2    4.48    0.15
   8 -10  -2    4.45    0.18
   8  10   2    4.92    0.18
  -8 -10   2    4.62    0.18
  -8  10  -2    4.53    0.16
   8  10   2    4.63    0.12
 -10  10   2  271.01    5.64
 -10  10   2  279.01    5.78
  10 -10   2  263.51    5.63
  10 -10   2  275.88    5.63
  10  10  -2  270.08    5.70
 -10 -10  -2  261.92    5.61
  10  10  -2  275.43    5.84
  10 -10   2  262.50    5.64
 -10  10  -2  274.38    5.79
  10  10   2  270.94    5.93
 -10 -10   2  268.36    5.63
  10  10   2  258.61    5.56
  10 -10  -2  274.77    5.65
  10 -10  -2  266.13    5.64
  10  10   2  264.01    5.69
  12 -10   2    3.59    0.16
 -12 -10  -2    3.33    0.15
 -12  10   2    3.27    0.12
  12  10  -2    3.62    0.17
 -12  10   2    3.30    0.16
  12 -10   2    3.33    0.13
  12  10  -2    3.61    0.17
  12 -10   2    3.62    0.17
 -12  10  -2    3.39    0.14
  12 -10  -2    3.55    0.17
  12  10   2    3.35    0.10
  12  10   2    3.74    0.17
  12 -10  -2    3.46    0.14
  14 -10   2   38.86    0.89
 -14  10   2   37.73    0.90
 -14  10   2   39.04    0.94
  14  10  -2   41.94    0.97
  14 -10   2   38.84    0.95
  14 -10   2   39.10    0.94
  14  10   2   38.31    0.85
  14 -10  -2   38.93    0.91
 -14  10  -2   38.86    0.92
  14  10   2   41.22    0.97
 -16 -10  -2    0.39    0.07
 -16  10   2    0.51    0.06
  16 -10   2    0.65    0.09
  16  10  -2    0.63    0.09
  16 -10   2    0.55    0.07
  16  10  -2    0.56    0.08
  16 -10   2    0.55    0.08
 -16  10   2    0.52    0.08
 -16 -10   2    0.40    0.08
  16  10   2    0.60    0.08
  16  10   2    0.55    0.05
  16 -10  -2    0.62    0.08
  16 -10  -2    0.49    0.08
 -16  10  -2    0.64    0.07
 -16 -10   2    0.54    0.04
  16  10   2    0.66    0.10
 -18  10   2  102.14    2.22
  18 -10   2   98.94    2.23
 -18  10   2  102.41    2.24
  18 -10   2   98.04    2.20
  18  10  -2  103.54    2.29
 -18 -10  -2  100.97    2.22
  18  10  -2   98.28    2.27
  18 -10   2   99.37    2.24
  18  10   2  101.40    2.28
  18  10   2   96.85    2.13
  18  10   2  106.62    2.30
 -18  10  -2  101.86    2.25
  18 -10  -2  102.19    2.23
 -18 -10   2  100.58    2.24
  18 -10  -2   99.18    2.24
 -20 -10  -2    1.43    0.13
  20 -10   2    1.69    0.14
  20  10  -2    1.18    0.14
 -20  10   2    1.33    0.13
  20  10  -2    1.48    0.13
  20 -10   2    1.20    0.10
  20  10   2    1.36    0.12
  20  10   2    1.21    0.14
  20 -10  -2    1.11    0.13
  20 -10  -2    1.31    0.13
 -20  10  -2    1.23    0.10
 -20  10  -2    1.21    0.13
 -20 -10   2    1.23    0.13
  22  10  -2   31.28    0.86
 -22  10   2   31.01    0.82
  22  10  -2   31.94    0.82
 -22 -10  -2   30.18    0.80
  22 -10   2   30.91    0.78
  22 -10   2   30.15    0.83
  22  10   2   30.73    0.83
  22  10   2   31.67    0.85
  22 -10  -2   30.46    0.83
 -22  10  -2   31.44    0.82
  22 -10  -2   30.55    0.80
 -22  10  -2   31.83    0.78
 -22 -10   2   31.00    0.82
  24  10  -2    1.45    0.17
 -24 -10  -2    1.17    0.14
  24 -10   2    1.53    0.16
  24  10  -2    1.52    0.14
 -24  10   2    1.54    0.15
  24 -10   2    1.32    0.12
  24 -10  -2    1.27    0.14
  24  10   2    1.27    0.15
  24  10   2    1.58    0.17
  24 -10  -2    1.56    0.17
 -24 -10   2    1.29    0.15
 -24  10  -2    1.08    0.13
  26  10  -2   44.96    1.19
  26  10  -2   46.70    1.15
 -26 -10  -2   44.10    1.13
 -26  10   2   44.74    1.13
  26 -10   2   44.11    1.15
 -26  10  -2   45.64    1.14
  26 -10  -2   45.19    1.13
  26  10   2   46.26    1.17
  26  10   2   43.66    1.17
 -26 -10   2   44.32    1.15
  26 -10  -2   44.56    1.16
  28  10  -2    0.22    0.08
 -28  10   2    0.21    0.09
  28 -10   2    0.00    0.07
  28  10  -2    0.17    0.09
 -28 -10  -2    0.07    0.07
  28 -10  -2    0.23    0.08
 -28  10  -2    0.17    0.08
  28  10   2    0.04    0.08
 -28 -10   2    0.22    0.10
  28 -10  -2    0.19    0.09
  28  10   2    0.09    0.09
 -30 -10  -2   19.04    0.61
  30  10  -2   19.13    0.61
  30 -10   2   17.93    0.62
 -30  10   2   19.34    0.61
  30  10  -2   20.79    0.67
  30  10   2   18.21    0.64
 -30  10  -2   18.79    0.61
 -30 -10   2   18.36    0.62
  30 -10  -2   18.89    0.64
  30  10   2   18.19    0.61
  32  10  -2    0.05    0.10
 -32  10   2    0.08    0.09
  32 -10   2    0.14    0.09
 -32 -10  -2    0.06    0.09
 -32  10  -2    0.10    0.09
  32  10   2   -0.06    0.07
 -32 -10   2   -0.04    0.09
  32 -10  -2    0.03    0.08
  32  10   2    0.00    0.09
 -34 -10  -2   10.79    0.45
 -34  10   2   10.63    0.45
  34 -10   2    9.94    0.45
  34  10  -2   11.16    0.50
  34  10   2   10.66    0.48
 -34 -10   2   10.26    0.46
  34 -10  -2   10.10    0.46
 -34  10  -2   10.97    0.45
 -36  10   2    0.38    0.13
 -36 -10  -2    0.53    0.14
  36 -10   2    0.51    0.14
  36  10  -2    0.52    0.15
 -36 -10   2    0.42    0.14
  36 -10  -2    0.45    0.13
  36  10   2    0.38    0.13
 -36  10  -2    0.40    0.13
  38  10  -2    9.60    0.49
  38 -10   2    8.83    0.45
 -38  10   2    9.49    0.44
 -38  10  -2    9.65    0.44
 -38 -10   2    8.48    0.45
  38 -10  -2    9.50    0.47
  38  10   2    8.88    0.46
  40  10  -2    0.26    0.13
  40 -10   2   -0.12    0.09
 -40  10   2    0.01    0.11
  40 -10  -2    0.08    0.10
 -40 -10   2    0.29    0.14
  40  10   2   -0.10    0.11
 -40  10  -2    0.27    0.13
   0 -12  -2    0.00    0.03
   0  12   2   -0.04    0.03
   0 -12   2   -0.05    0.02
   0  12   2   -0.05    0.03
   0  12  -2   -0.02    0.02
   0 -12  -2   -0.04    0.03
   0  12  -2    0.00    0.04
   0 -12   2   -0.01    0.03
   2  12  -2    0.16    0.06
   2  12  -2    0.21    0.05
   2 -12   2    0.08    0.04
   2  12  -2    0.23    0.04
  -2 -12  -2    0.14    0.04
  -2  12   2    0.24    0.06
  -2 -12  -2    0.22    0.05
   2 -12   2    0.23    0.04
  -2  12   2    0.17    0.05
   2 -12  -2    0.24    0.05
  -2  12  -2    0.26    0.04
   2 -12  -2    0.16    0.05
  -2 -12   2    0.12    0.04
  -2  12  -2    0.30    0.07
   2  12   2    0.16    0.04
   2  12   2    0.18    0.05
  -4 -12  -2    0.03    0.04
   4  12  -2    0.03    0.02
   4 -12   2   -0.02    0.02
   4  12  -2    0.03    0.05
  -4  12   2    0.06    0.04
  -4 -12  -2    0.07    0.04
   4  12  -2    0.05    0.04
   4 -12   2    0.02    0.04
  -4  12   2    0.06    0.04
  -4  12  -2    0.07    0.04
  -4 -12   2   -0.01    0.04
   4  12   2    0.12    0.03
   4 -12  -2    0.04    0.04
   4 -12  -2    0.02    0.03
   4  12   2    0.24    0.06
  -4  12  -2    0.04    0.05
  -6 -12  -2    2.30    0.11
  -6 -12  -2    1.94    0.12
  -6  12   2    2.18    0.12
   6 -12   2    1.97    0.08
   6  12  -2    1.88    0.13
   6  12  -2    2.05    0.11
  -6  12   2    2.20    0.12
   6 -12   2    2.08    0.11
   6  12  -2    1.91    0.07
   6 -12   2    2.34    0.13
   6  12   2    2.36    0.13
  -6 -12   2    2.06    0.12
   6 -12  -2    2.24    0.10
   6 -12  -2    2.15    0.12
  -6  12  -2    2.44    0.12
   6  12   2    2.22    0.12
   6  12   2    2.14    0.08
   8 -12   2    1.30    0.10
   8  12  -2    1.32    0.10
  -8 -12  -2    1.21    0.09
   8  12  -2    1.27    0.11
   8 -12   2    1.30    0.06
  -8  12   2    1.29    0.10
  -8  12   2    1.27    0.09
   8 -12   2    1.38    0.10
   8  12   2    1.25    0.10
   8  12   2    1.38    0.11
  -8 -12   2    1.42    0.10
   8  12   2    1.25    0.05
   8 -12  -2    1.27    0.10
  -8  12  -2    1.43    0.09
   8 -12  -2    1.13    0.07
  10 -12   2    8.63    0.23
 -10  12   2    8.76    0.26
  10 -12   2    7.93    0.28
  10  12  -2    8.32    0.29
  10  12  -2    8.37    0.28
 -10 -12  -2    8.36    0.27
 -10  12   2    8.24    0.27
  10  12   2    8.06    0.20
  10  12   2    8.59    0.29
  10  12   2    8.53    0.29
 -10  12  -2    8.91    0.26
 -10 -12   2    8.53    0.28
  10 -12  -2    8.47    0.29
  10 -12  -2    8.70    0.24
 -12  12   2    0.82    0.07
 -12 -12  -2    1.23    0.10
  12  12  -2    0.92    0.11
  12 -12   2    0.98    0.11
  12 -12   2    0.97    0.06
  12  12  -2    1.06    0.11
 -12  12   2    0.99    0.10
  12 -12   2    1.07    0.10
  12  12   2    1.11    0.10
 -12 -12   2    0.90    0.10
 -12  12  -2    1.00    0.08
  12  12   2    1.07    0.05
  12 -12  -2    1.08    0.08
  12 -12  -2    1.01    0.10
  12  12   2    1.10    0.11
  14 -12   2    2.47    0.15
  14  12  -2    2.26    0.14
  14 -12   2    2.24    0.14
 -14  12   2    2.16    0.14
  14  12  -2    2.15    0.15
 -14 -12  -2    2.35    0.14
 -14  12   2    2.18    0.11
  14 -12   2    2.19    0.10
  14 -12  -2    1.88    0.14
 -14  12  -2    2.07    0.14
  14 -12  -2    2.25    0.12
  14  12   2    2.23    0.08
 -14 -12   2    2.11    0.14
  14  12   2    2.13    0.14
  14  12   2    2.16    0.15
 -14  12  -2    2.08    0.12
  16 -12   2    0.07    0.05
  16  12  -2    0.00    0.04
 -16  12   2    0.08    0.04
  16  12  -2    0.06    0.05
  16 -12   2   -0.02    0.03
 -16  12   2    0.03    0.04
 -16 -12  -2    0.09    0.05
  16  12   2    0.06    0.05
  16  12   2    0.01    0.05
  16 -12  -2    0.05    0.03
 -16  12  -2   -0.01    0.04
  16 -12  -2    0.00    0.05
 -16  12  -2    0.12    0.05
 -16 -12   2   -0.05    0.04
  18  12  -2    4.60    0.24
  18  12  -2    5.25    0.24
 -18  12   2    5.03    0.18
 -18 -12  -2    4.75    0.22
  18 -12   2    4.89    0.23
 -18  12   2    5.07    0.23
  18 -12   2    4.62    0.19
  18 -12  -2    5.03    0.21
 -18 -12   2    4.84    0.23
 -18  12  -2    5.08    0.20
  18 -12  -2    4.94    0.24
  18  12   2    5.17    0.25
  18  12   2    4.73    0.23
 -18  12  -2    4.97    0.23
 -20  12   2    0.15    0.06
  20  12  -2    0.27    0.09
  20 -12   2    0.23    0.05
  20 -12   2    0.22    0.07
 -20 -12  -2    0.24    0.07
  20  12  -2    0.13    0.06
  20 -12  -2    0.20    0.07
  20  12   2    0.17    0.07
  20 -12  -2    0.42    0.08
  20  12   2    0.19    0.07
 -20 -12   2    0.22    0.08
 -20  12  -2    0.29    0.06
 -20  12  -2    0.14    0.08
  22  12  -2    3.48    0.20
  22  12  -2    3.32    0.22
 -22 -12  -2    3.42    0.20
 -22  12   2    3.01    0.20
  22 -12   2    3.44    0.21
 -22  12  -2    3.83    0.21
  22  12   2    3.60    0.21
  22  12   2    3.30    0.22
  22 -12  -2    2.84    0.20
 -22 -12   2    3.08    0.20
  22 -12  -2    3.29    0.18
  24  12  -2   -0.01    0.06
  24 -12   2    0.18    0.08
 -24 -12  -2    0.14    0.07
  24  12  -2    0.25    0.10
 -24  12   2    0.17    0.08
  24 -12  -2    0.03    0.05
  24  12   2    0.22    0.08
  24 -12  -2    0.09    0.07
 -24  12  -2    0.20    0.08
 -24 -12   2    0.31    0.09
  24  12   2    0.20    0.08
  26  12  -2    2.47    0.18
  26  12  -2    2.18    0.22
 -26  12   2    2.82    0.20
 -26 -12  -2    2.48    0.19
  26 -12   2    2.65    0.20
  26  12   2    2.26    0.20
  26 -12  -2    2.07    0.19
 -26  12  -2    2.32    0.19
  26  12   2    2.34    0.19
 -26 -12   2    2.76    0.20
 -28 -12  -2    0.68    0.12
  28  12  -2    0.65    0.12
  28  12  -2    0.71    0.13
 -28  12   2    0.88    0.14
  28 -12   2    0.82    0.14
  28 -12  -2    0.81    0.14
  28  12   2    0.63    0.14
 -28 -12   2    0.57    0.12
  28  12   2    0.61    0.12
 -28  12  -2    0.80    0.13
 -30 -12  -2    2.48    0.23
 -30  12   2    1.92    0.20
  30  12  -2    2.10    0.19
  30  12  -2    2.07    0.23
  30 -12   2    1.91    0.20
 -30 -12   2    2.00    0.21
 -30  12  -2    2.24    0.20
  30 -12  -2    1.68    0.20
  30  12   2    2.14    0.23
  30  12   2    2.09    0.19
 -32 -12  -2    0.04    0.09
 -32  12   2    0.24    0.12
  32  12  -2    0.18    0.11
  32 -12   2    0.22    0.11
  32 -12  -2    0.29    0.12
  32  12   2   -0.04    0.07
 -32  12  -2    0.11    0.10
  32  12   2    0.01    0.09
 -32 -12   2    0.10    0.10
 -34 -12  -2    0.91    0.16
 -34  12   2    0.94    0.17
  34 -12   2    0.61    0.15
  34  12  -2    1.26    0.20
 -34  12  -2    0.71    0.15
 -34 -12   2    0.99    0.17
  34  12   2    0.97    0.18
  34 -12  -2    0.79    0.16
  36  12  -2    0.19    0.12
  36 -12   2    0.14    0.10
 -36  12   2   -0.07    0.10
  36 -12  -2    0.08    0.10
 -36 -12   2    0.55    0.16
  36  12   2    0.07    0.10
 -36  12  -2    0.06    0.10
  38  12  -2    1.10    0.21
  38 -12   2    1.02    0.19
 -38  12   2    1.38    0.20
  38  12   2    0.95    0.20
 -38 -12   2    0.58    0.17
  38 -12  -2    1.27    0.21
 -38  12  -2    1.01    0.18
 -40  12   2    0.05    0.12
  40 -12   2    0.10    0.12
  40  12  -2    0.00    0.12
 -40  12  -2    0.18    0.13
  40 -12  -2    0.03    0.10
 -40 -12   2    0.16    0.13
  40  12   2    0.13    0.13
   0 -14  -2   16.13    0.42
   0 -14  -2   15.48    0.41
   0  14   2   15.96    0.44
   0  14  -2   15.80    0.46
   0 -14   2   15.81    0.40
   0 -14   2   16.04    0.43
   0  14   2   14.91    0.40
   0  14  -2   15.34    0.39
   2 -14   2  296.38    6.18
  -2 -14  -2  296.46    6.22
   2  14  -2  281.01    6.19
   2  14  -2  295.99    6.41
   2 -14   2  300.48    6.19
  -2 -14  -2  291.15    6.16
  -2  14   2  291.98    6.25
  -2  14   2  299.57    6.39
   2  14   2  300.29    6.53
   2 -14  -2  292.59    6.17
   2  14   2  274.57    6.14
  -2 -14   2  297.53    6.17
  -2  14  -2  309.63    6.42
   2 -14  -2  299.98    6.20
  -2 -14   2  300.76    6.21
  -2  14  -2  297.94    6.15
   4 -14   2   10.24    0.26
  -4  14   2    9.45    0.29
   4 -14   2    9.77    0.31
  -4  14   2    9.72    0.31
   4  14  -2    9.03    0.25
  -4  14  -2    8.53    0.31
  -4  14  -2    9.46    0.28
   4  14   2   10.68    0.33
   4 -14  -2    9.46    0.30
   4  14   2    9.96    0.26
   4 -14  -2   10.00    0.28
  -6 -14  -2  131.26    2.86
   6  14  -2  135.54    2.89
  -6  14   2  129.61    2.87
  -6  14   2  134.04    2.96
   6  14  -2  128.19    2.99
   6 -14   2  133.85    2.88
   6 -14   2  136.58    2.83
  -6 -14  -2  136.94    2.91
   6  14  -2  134.39    2.79
  -6 -14   2  132.44    2.87
  -6  14  -2  135.51    2.97
  -6  14  -2  135.26    2.86
   6  14   2  145.04    3.00
   6 -14  -2  134.70    2.86
   6 -14  -2  131.96    2.87
   6  14   2  131.30    2.80
  -8  14   2    6.61    0.24
   8 -14   2    6.54    0.24
  -8 -14  -2    6.28    0.23
   8  14  -2    6.28    0.26
   8  14  -2    6.46    0.24
  -8  14   2    6.46    0.23
   8 -14   2    6.65    0.18
   8  14   2    6.33    0.17
   8  14   2    6.85    0.24
   8  14   2    6.42    0.25
  -8  14  -2    6.79    0.24
   8 -14  -2    6.31    0.20
  -8 -14   2    6.71    0.24
   8 -14  -2    6.52    0.24
  -8  14  -2    6.86    0.23
  10 -14   2  103.35    2.12
  10  14  -2   94.26    2.27
  10  14  -2   99.46    2.20
  10 -14   2   95.44    2.18
 -10 -14  -2   98.66    2.16
 -10  14   2  102.13    2.22
 -10  14   2   99.21    2.18
  10  14   2   97.08    2.20
  10 -14  -2  101.81    2.14
 -10 -14   2   98.00    2.18
 -10  14  -2  101.52    2.18
 -10  14  -2  104.77    2.23
  10 -14  -2   98.11    2.19
  10  14   2   98.06    2.07
  10  14   2   99.87    2.26
 -12  14   2    2.26    0.14
  12 -14   2    2.12    0.14
 -12 -14  -2    2.04    0.13
 -12  14   2    2.09    0.12
  12  14  -2    2.29    0.15
  12  14  -2    1.91    0.14
  12 -14   2    2.16    0.10
 -12 -14   2    2.11    0.14
  12  14   2    2.12    0.14
  12 -14  -2    2.07    0.14
 -12  14  -2    2.05    0.14
  12 -14  -2    2.18    0.11
 -12  14  -2    2.19    0.12
  12  14   2    2.29    0.15
  14  14  -2   83.40    1.90
 -14 -14  -2   81.84    1.85
 -14  14   2   79.95    1.87
  14  14  -2   85.20    1.95
 -14  14   2   85.73    1.87
  14 -14   2   82.50    1.89
  14 -14   2   82.37    1.81
  14  14   2   82.72    1.90
 -14 -14   2   85.24    1.88
  14  14   2   85.61    1.95
 -14  14  -2   84.27    1.88
  14 -14  -2   81.88    1.88
  14 -14  -2   83.68    1.83
 -14  14  -2   85.38    1.89
 -16 -14  -2    0.10    0.06
  16  14  -2    0.17    0.07
 -16  14   2    0.12    0.06
  16 -14   2    0.24    0.07
  16  14  -2    0.07    0.06
  16 -14   2    0.17    0.04
 -16  14   2    0.10    0.04
  16  14   2    0.20    0.07
  16 -14  -2    0.18    0.07
 -16 -14   2    0.14    0.06
  16 -14  -2    0.15    0.05
 -16  14  -2    0.09    0.06
  16  14   2    0.24    0.07
 -16  14  -2    0.19    0.05
 -18 -14  -2   93.82    2.12
  18 -14   2   94.60    2.15
  18  14  -2   92.06    2.17
 -18  14   2   91.95    2.13
  18  14  -2   98.00    2.22
  18 -14  -2   97.31    2.11
 -18 -14   2   96.40    2.14
  18  14   2   93.02    2.18
 -18  14  -2   96.86    2.14
 -18  14  -2   97.85    2.14
  18  14   2   96.14    2.21
  18 -14  -2   93.66    2.15
  20 -14   2    0.86    0.13
  20  14  -2    1.01    0.14
  20  14  -2    0.88    0.12
 -20 -14  -2    0.98    0.12
 -20  14   2    0.88    0.12
 -20  14  -2    0.96    0.12
  20 -14  -2    0.72    0.12
 -20  14  -2    0.98    0.10
  20  14   2    0.99    0.14
 -20 -14   2    0.86    0.13
  20  14   2    0.86    0.12
  20 -14  -2    0.91    0.11
 -22 -14  -2   20.89    0.61
  22 -14   2   21.30    0.65
 -22  14   2   21.37    0.63
  22  14  -2   21.56    0.66
  22  14  -2   21.66    0.64
  22 -14  -2   21.93    0.65
  22  14   2   20.03    0.63
  22  14   2   21.17    0.66
 -22 -14   2   21.59    0.63
 -22  14  -2   20.82    0.63
  24 -14   2    0.94    0.14
  24  14  -2    0.86    0.14
  24  14  -2    1.12    0.15
 -24 -14  -2    0.68    0.12
 -24  14   2    0.85    0.13
  24  14   2    0.98    0.15
  24 -14  -2    1.01    0.14
  24  14   2    0.86    0.13
 -24 -14   2    0.84    0.13
 -24  14  -2    0.87    0.13
  26 -14   2   29.33    0.86
  26  14  -2   31.09    0.86
 -26 -14  -2   29.98    0.83
 -26  14   2   30.03    0.85
  26  14  -2   29.72    0.88
  26  14   2   29.67    0.86
  26  14   2   29.42    0.88
 -26  14  -2   31.13    0.85
  26 -14  -2   29.84    0.86
 -26 -14   2   29.63    0.84
  28  14  -2    0.01    0.07
  28 -14   2    0.09    0.08
 -28 -14  -2    0.00    0.08
 -28  14   2    0.11    0.09
  28  14  -2    0.09    0.09
 -28  14  -2    0.02    0.07
  28  14   2    0.05    0.09
  28  14   2    0.02    0.08
 -28 -14   2   -0.05    0.08
  28 -14  -2   -0.07    0.07
 -30 -14  -2    9.79    0.41
  30 -14   2    9.77    0.44
  30  14  -2    9.87    0.46
 -30  14   2   10.32    0.43
  30  14  -2   10.98    0.43
  30  14   2   10.16    0.45
 -30  14  -2   10.57    0.44
 -30 -14   2   10.00    0.43
  30  14   2   10.63    0.44
  30 -14  -2   10.33    0.45
 -32  14   2    0.28    0.12
 -32 -14  -2    0.37    0.12
  32 -14   2    0.25    0.11
  32  14  -2    0.11    0.10
  32  14   2    0.24    0.11
 -32  14  -2    0.32    0.12
 -32 -14   2    0.06    0.10
  32  14   2    0.29    0.13
  32 -14  -2    0.37    0.12
  34  14  -2   15.57    0.62
  34 -14   2   14.44    0.58
 -34  14   2   14.78    0.57
 -34  14  -2   15.09    0.57
  34  14   2   14.59    0.60
  34 -14  -2   14.88    0.59
 -34 -14   2   14.90    0.57
 -36  14   2    1.64    0.22
  36  14  -2    1.50    0.24
  36 -14   2    1.33    0.21
  36 -14  -2    1.77    0.23
 -36  14  -2    1.84    0.23
 -36 -14   2    1.75    0.23
  36  14   2    1.86    0.24
 -38  14   2    5.22    0.36
  38 -14   2    5.72    0.37
  38  14  -2    6.01    0.40
  38  14   2    6.73    0.41
  38 -14  -2    5.68    0.37
 -38 -14   2    6.10    0.38
 -38  14  -2    5.82    0.37
 -40  14   2   -0.08    0.11
  40 -14   2    0.26    0.14
  40  14   2   -0.01    0.10
 -40  14  -2    0.27    0.14
   0 -16   2    0.04    0.03
   0  16   2    0.02    0.04
   0 -16   2   -0.02    0.04
   0 -16  -2   -0.05    0.03
   0  16   2    0.02    0.04
   0  16  -2    0.02    0.04
   0  16  -2    0.01    0.03
   0 -16  -2   -0.01    0.04
  -2  16   2    0.62    0.09
  -2 -16  -2    0.53    0.07
   2 -16   2    0.55    0.08
  -2  16   2    0.58    0.08
   2 -16   2    0.63    0.06
   2  16  -2    0.61    0.09
   2  16  -2    0.69    0.06
  -2 -16  -2    0.55    0.07
  -2  16  -2    0.68    0.10
  -2  16  -2    0.72    0.07
  -2 -16   2    0.82    0.09
  -2 -16   2    0.75    0.08
   2 -16  -2    0.64    0.08
   2 -16  -2    0.66    0.07
   2  16   2    0.88    0.11
   2  16   2    0.51    0.06
   4 -16   2    1.40    0.11
   4  16  -2    1.41    0.08
   4  16  -2    1.36    0.12
  -4  16   2    1.20    0.10
   4 -16   2    1.46    0.08
  -4 -16  -2    1.12    0.10
  -4 -16  -2    1.28    0.10
  -4  16   2    1.27    0.11
   4  16   2    1.38    0.12
  -4  16  -2    1.30    0.12
  -4  16  -2    1.19    0.09
   4 -16  -2    1.43    0.11
   4  16   2    1.45    0.08
  -4 -16   2    1.39    0.11
   4 -16  -2    1.34    0.09
  -4 -16   2    1.38    0.10
   6  16  -2    0.29    0.08
  -6 -16  -2    0.34    0.06
  -6 -16  -2    0.36    0.07
   6 -16   2    0.37    0.07
   6  16  -2    0.33    0.04
   6  16  -2    0.38    0.06
  -6  16   2    0.26    0.06
  -6  16   2    0.21    0.06
   6 -16   2    0.43    0.05
   6  16   2    0.47    0.05
  -6 -16   2    0.37    0.07
   6  16   2    0.42    0.09
  -6  16  -2    0.40    0.07
   6 -16  -2    0.40    0.06
   6 -16  -2    0.38    0.07
  -6  16  -2    0.59    0.09
   8 -16   2    0.58    0.05
   8  16  -2    0.66    0.10
  -8  16   2    0.53    0.08
  -8 -16  -2    0.72    0.09
   8 -16   2    0.49    0.08
  -8  16   2    0.71    0.09
  -8 -16  -2    0.45    0.07
   8  16  -2    0.79    0.09
  -8  16  -2    0.67    0.09
   8 -16  -2    0.50    0.08
  -8 -16   2    0.61    0.09
   8  16   2    0.56    0.04
   8 -16  -2    0.57    0.06
   8  16   2    0.83    0.11
  -8  16  -2    0.66    0.08
  10 -16   2    1.35    0.12
 -10 -16  -2    1.30    0.11
  10  16  -2    1.38    0.12
  10  16  -2    1.13    0.12
  10 -16   2    1.58    0.08
 -10  16   2    1.40    0.12
 -10  16   2    1.28    0.11
 -10  16  -2    1.41    0.12
 -10 -16   2    1.39    0.12
  10 -16  -2    1.25    0.08
  10 -16  -2    1.36    0.12
  10  16   2    1.43    0.13
  10  16   2    1.43    0.12
 -10  16  -2    1.69    0.12
  10  16   2    1.34    0.06
  12 -16   2    0.06    0.05
 -12 -16  -2    0.02    0.05
  12  16  -2    0.14    0.07
 -12  16   2    0.15    0.05
 -12  16   2    0.07    0.05
  12  16  -2    0.05    0.05
  12 -16   2    0.07    0.03
 -12  16  -2    0.08    0.05
  12  16   2    0.00    0.04
  12 -16  -2    0.09    0.04
  12 -16  -2    0.04    0.05
 -12  16  -2    0.10    0.06
 -12 -16   2    0.08    0.06
  12  16   2    0.05    0.05
 -14 -16  -2    0.29    0.07
 -14  16   2    0.43    0.08
  14  16  -2    0.31    0.08
 -14  16   2    0.42    0.07
  14 -16   2    0.44    0.09
  14  16  -2    0.50    0.09
  14  16   2    0.45    0.09
  14 -16  -2    0.36    0.08
 -14  16  -2    0.39    0.07
 -14 -16   2    0.33    0.08
  14 -16  -2    0.41    0.06
  14  16   2    0.39    0.09
 -14  16  -2    0.37    0.08
  16  16  -2    0.21    0.08
 -16 -16  -2    0.12    0.06
  16 -16   2    0.10    0.06
 -16  16   2    0.04    0.05
 -16  16   2    0.05    0.05
  16  16  -2    0.06    0.06
 -16 -16   2    0.00    0.06
 -16  16  -2    0.10    0.05
  16 -16  -2    0.04    0.04
  16  16   2    0.04    0.06
  16 -16  -2    0.03    0.05
 -16  16  -2    0.00    0.05
  16  16   2   -0.01    0.06
  18  16  -2    3.51    0.22
 -18  16   2    3.29    0.20
 -18 -16  -2    3.50    0.20
  18  16  -2    3.24    0.20
  18 -16   2    3.36    0.21
  18  16   2    3.75    0.22
 -18  16  -2    3.26    0.17
  18 -16  -2    3.00    0.16
  18  16   2    3.43    0.21
 -18  16  -2    3.39    0.20
  18 -16  -2    3.82    0.22
 -18 -16   2    3.22    0.20
 -20 -16  -2    1.08    0.13
  20  16  -2    1.06    0.14
  20 -16   2    1.02    0.14
  20  16  -2    1.22    0.15
 -20  16   2    0.94    0.14
  20  16   2    0.85    0.13
  20 -16  -2    1.18    0.15
  20  16   2    1.01    0.14
 -20 -16   2    1.01    0.14
 -20  16  -2    0.94    0.13
  22  16  -2    2.37    0.20
 -22  16   2    2.09    0.18
  22  16  -2    1.96    0.18
  22 -16   2    2.37    0.19
 -22 -16  -2    2.37    0.18
 -22  16  -2    2.17    0.18
  22 -16  -2    1.89    0.19
  22  16   2    2.30    0.20
 -22 -16   2    1.96    0.19
  22  16   2    2.22    0.18
  24 -16   2    0.91    0.14
 -24  16   2    1.05    0.15
  24  16  -2    0.99    0.15
 -24 -16  -2    0.83    0.13
  24  16  -2    0.90    0.14
 -24  16  -2    0.96    0.14
  24 -16  -2    1.21    0.16
  24  16   2    0.88    0.14
  24  16   2    0.89    0.15
 -24 -16   2    0.85    0.14
 -26 -16  -2    0.71    0.13
  26  16  -2    0.45    0.11
  26 -16   2    0.69    0.13
  26  16  -2    0.36    0.11
 -26  16   2    0.63    0.12
  26 -16  -2    0.32    0.11
 -26 -16   2    0.57    0.13
 -26  16  -2    0.54    0.12
  26  16   2    0.60    0.14
  26  16   2    0.42    0.11
  28  16  -2    0.41    0.11
  28  16  -2    0.26    0.11
 -28  16   2    0.37    0.12
  28 -16   2    0.29    0.10
 -28 -16  -2    0.18    0.09
 -28 -16   2    0.12    0.09
  28  16   2    0.17    0.09
 -28  16  -2    0.35    0.11
  28 -16  -2    0.43    0.11
  28  16   2    0.26    0.11
 -30 -16  -2    1.95    0.20
  30  16  -2    1.80    0.23
 -30  16   2    1.61    0.20
  30 -16   2    1.73    0.21
  30  16  -2    1.42    0.19
  30 -16  -2    1.30    0.19
  30  16   2    1.32    0.20
  30  16   2    2.04    0.22
 -30 -16   2    1.35    0.19
 -30  16  -2    1.91    0.21
  32  16  -2    0.58    0.14
 -32  16   2    0.39    0.13
  32 -16   2    0.23    0.12
 -32 -16  -2    0.54    0.14
  32  16  -2    0.48    0.13
 -32 -16   2    0.36    0.12
  32  16   2    0.07    0.11
  32 -16  -2    0.55    0.14
  32  16   2    0.35    0.11
 -32  16  -2    0.27    0.12
  34 -16   2    1.18    0.19
 -34  16   2    1.24    0.20
  34  16  -2    1.46    0.22
  34  16   2    0.92    0.18
 -34 -16   2    1.47    0.22
 -34  16  -2    1.10    0.18
  34 -16  -2    1.23    0.19
  34  16   2    0.98    0.17
  36  16  -2    0.60    0.17
 -36  16   2    0.12    0.13
  36 -16   2    0.13    0.11
  36  16   2    0.16    0.12
  36 -16  -2    0.25    0.12
 -36 -16   2    0.14    0.12
 -36  16  -2    0.30    0.14
  38  16  -2    0.46    0.16
 -38  16   2    0.51    0.16
  38 -16   2    0.66    0.17
  38 -16  -2    0.72    0.17
 -38  16  -2    0.22    0.13
  38  16   2    0.67    0.17
   0 -18   2    6.82    0.26
   0  18   2    6.72    0.23
   0  18  -2    6.32    0.27
   0 -18  -2    6.70    0.25
   0  18  -2    6.50    0.22
   0 -18   2    6.72    0.22
   0 -18  -2    6.42    0.23
   0  18   2    6.54    0.26
   2  18  -2   62.97    1.37
   2 -18   2   62.31    1.43
  -2  18   2   59.26    1.40
   2 -18   2   62.47    1.38
  -2 -18  -2   63.13    1.41
  -2 -18  -2   63.03    1.42
   2  18  -2   64.56    1.50
  -2  18   2   60.81    1.47
   2 -18  -2   61.58    1.42
   2 -18  -2   62.06    1.40
   2  18   2   60.55    1.38
  -2  18  -2   61.40    1.38
  -2 -18   2   62.27    1.40
  -2 -18   2   61.02    1.42
  -2  18  -2   64.75    1.49
   2  18   2   63.02    1.48
   4  18  -2    3.09    0.12
  -4  18   2    3.24    0.16
  -4 -18  -2    3.27    0.16
   4 -18   2    3.17    0.13
   4 -18   2    3.30    0.18
  -4 -18  -2    3.61    0.17
  -4  18   2    3.20    0.17
   4  18  -2    3.10    0.19
   4 -18  -2    2.88    0.17
  -4 -18   2    3.26    0.16
   4  18   2    3.30    0.14
  -4  18  -2    3.13    0.15
  -4  18  -2    3.12    0.18
   4  18   2    3.43    0.19
   4 -18  -2    3.16    0.14
  -4 -18   2    3.39    0.17
   6  18  -2   62.20    1.53
  -6 -18  -2   63.74    1.44
  -6  18   2   63.44    1.50
   6  18  -2   64.01    1.36
   6 -18   2   63.49    1.39
  -6 -18  -2   62.90    1.47
   6 -18   2   63.97    1.47
  -6  18   2   62.69    1.45
  -6 -18   2   64.41    1.46
  -6  18  -2   64.72    1.44
   6  18   2   64.95    1.38
   6 -18  -2   63.80    1.46
   6  18   2   63.12    1.52
  -6 -18   2   62.05    1.46
  -6  18  -2   65.07    1.53
   6 -18  -2   63.74    1.42
   8 -18   2    0.89    0.06
  -8  18   2    0.87    0.10
  -8  18   2    0.90    0.11
   8  18  -2    0.95    0.12
  -8 -18  -2    0.85    0.10
  -8 -18  -2    0.98    0.11
   8 -18   2    1.08    0.12
   8  18  -2    1.00    0.10
  -8 -18   2    0.75    0.10
  -8  18  -2    0.90    0.11
   8 -18  -2    0.97    0.11
   8  18   2    0.90    0.06
   8 -18  -2    1.03    0.08
  -8  18  -2    0.89    0.10
   8  18   2    0.91    0.12
  10 -18   2   96.27    2.17
 -10  18   2   94.99    2.15
 -10 -18  -2   96.68    2.20
  10 -18   2   99.64    2.08
 -10 -18  -2   96.40    2.14
  10  18  -2   96.96    2.17
 -10  18   2   97.44    2.21
  10  18  -2   90.28    2.25
  10 -18  -2   95.46    2.17
 -10  18  -2  101.36    2.23
 -10  18  -2   99.88    2.15
  10  18   2   98.42    2.26
 -10 -18   2   97.26    2.16
  10 -18  -2   97.74    2.10
 -12 -18  -2    1.80    0.14
  12  18  -2    1.88    0.16
  12 -18   2    2.00    0.15
  12  18  -2    2.02    0.15
 -12  18   2    1.77    0.13
 -12  18   2    1.83    0.14
 -12 -18   2    1.78    0.14
  12 -18  -2    1.87    0.15
 -12  18  -2    1.59    0.14
 -12  18  -2    1.73    0.14
  12 -18  -2    1.92    0.11
  12  18   2    1.97    0.15
  12  18   2    1.69    0.15
  14 -18   2   69.84    1.65
 -14  18   2   70.32    1.63
  14  18  -2   72.82    1.66
 -14  18   2   69.47    1.64
 -14 -18  -2   66.76    1.61
  14  18  -2   68.24    1.70
  14  18   2   71.64    1.66
  14 -18  -2   71.59    1.57
  14  18   2   71.88    1.71
 -14 -18   2   71.50    1.63
 -14  18  -2   71.55    1.65
  14 -18  -2   70.45    1.65
 -14  18  -2   70.13    1.63
  16  18  -2    1.01    0.14
 -16  18   2    0.89    0.12
  16  18  -2    1.24    0.14
 -16  18   2    1.09    0.11
  16 -18   2    1.05    0.13
  16 -18  -2    1.08    0.13
 -16  18  -2    1.16    0.13
 -16  18  -2    1.05    0.11
 -16 -18   2    0.77    0.11
  16  18   2    1.13    0.15
  18  18  -2   22.50    0.67
  18 -18   2   21.66    0.66
 -18  18   2   21.96    0.65
  18  18  -2   20.82    0.67
 -18 -18  -2   21.60    0.63
 -18  18  -2   22.55    0.61
  18  18   2   22.21    0.67
 -18 -18   2   22.68    0.65
  18 -18  -2   22.65    0.67
  18  18   2   22.43    0.68
 -18  18  -2   22.59    0.65
  20 -18   2    0.72    0.12
  20  18  -2    0.60    0.12
  20  18  -2    0.57    0.12
 -20  18   2    0.66    0.12
 -20 -18  -2    0.70    0.11
  20  18   2    0.65    0.13
  20 -18  -2    0.63    0.12
 -20 -18   2    0.72    0.12
  20  18   2    0.64    0.12
 -20  18  -2    0.59    0.11
  22  18  -2   43.47    1.18
 -22 -18  -2   44.30    1.11
  22 -18   2   44.38    1.16
  22  18  -2   44.11    1.17
 -22  18   2   44.12    1.15
  22  18   2   44.01    1.17
  22 -18  -2   44.28    1.16
  22  18   2   45.36    1.19
 -22  18  -2   43.55    1.14
 -22 -18   2   45.11    1.14
  24  18  -2    1.40    0.17
  24  18  -2    1.41    0.19
 -24  18   2    1.07    0.15
 -24 -18  -2    1.22    0.15
  24 -18   2    1.37    0.17
 -24  18  -2    1.04    0.14
  24  18   2    1.19    0.17
  24  18   2    1.25    0.17
 -24 -18   2    1.12    0.15
  24 -18  -2    0.93    0.14
 -26  18   2   25.75    0.79
  26  18  -2   26.94    0.83
  26 -18   2   25.41    0.80
 -26 -18  -2   26.57    0.77
  26  18  -2   25.89    0.80
 -26  18  -2   26.71    0.79
  26  18   2   26.84    0.82
  26  18   2   26.63    0.82
 -26 -18   2   26.00    0.78
  26 -18  -2   26.07    0.80
  28  18  -2    0.14    0.11
  28  18  -2    0.20    0.10
 -28  18   2    0.07    0.09
 -28 -18  -2    0.20    0.10
  28 -18   2    0.27    0.11
  28  18   2    0.10    0.10
 -28 -18   2    0.21    0.10
  28  18   2    0.20    0.11
  28 -18  -2    0.01    0.08
 -28  18  -2    0.13    0.09
  30 -18   2    9.38    0.44
 -30 -18  -2    9.95    0.42
 -30  18   2    9.37    0.43
  30  18  -2    9.94    0.44
  30  18  -2    9.57    0.46
  30  18   2    9.95    0.46
 -30 -18   2    9.88    0.43
  30 -18  -2   10.22    0.45
  30  18   2    9.27    0.44
 -30  18  -2    9.50    0.43
  32 -18   2    0.40    0.13
  32  18  -2    0.38    0.15
 -32  18   2    0.34    0.13
  32  18  -2    0.41    0.13
 -32 -18   2    0.33    0.13
  32 -18  -2    0.61    0.15
  32  18   2    0.22    0.13
  32  18   2    0.44    0.13
 -32  18  -2    0.39    0.13
  34  18  -2   11.64    0.53
  34 -18   2   10.56    0.50
 -34  18   2   11.22    0.50
  34 -18  -2   11.69    0.52
  34  18   2   11.20    0.53
 -34 -18   2   10.69    0.48
  34  18   2   10.59    0.50
 -34  18  -2   11.40    0.50
  36 -18   2    0.10    0.12
 -36  18   2   -0.06    0.10
  36  18  -2    0.21    0.13
  36 -18  -2    0.01    0.10
 -36  18  -2    0.15    0.12
  36  18   2    0.02    0.12
  38 -18   2    3.52    0.31
  38  18  -2    3.49    0.37
 -38  18   2    3.49    0.33
  38 -18  -2    3.33    0.30
 -38  18  -2    3.14    0.32
  38  18   2    2.92    0.32
   0  20   2   -0.04    0.04
   0 -20   2    0.03    0.04
   0  20  -2    0.01    0.03
   0 -20  -2   -0.01    0.04
   0 -20  -2   -0.03    0.04
   0  20  -2    0.00    0.05
   0 -20   2   -0.04    0.05
   0  20   2   -0.04    0.04
   2  20  -2    0.02    0.05
   2 -20   2    0.01    0.03
   2 -20   2    0.03    0.05
  -2 -20  -2    0.02    0.05
  -2 -20  -2    0.13    0.06
  -2  20   2    0.05    0.05
  -2  20   2   -0.04    0.04
   2  20  -2    0.05    0.03
   2  20   2   -0.04    0.03
   2 -20  -2    0.08    0.05
   2 -20  -2   -0.03    0.03
  -2 -20   2   -0.01    0.04
   2  20   2    0.04    0.05
  -2 -20   2    0.07    0.04
  -2  20  -2    0.00    0.05
  -2  20  -2    0.02    0.04
   4  20  -2    0.22    0.05
  -4 -20  -2    0.16    0.06
   4 -20   2    0.22    0.05
   4  20  -2    0.25    0.08
   4 -20   2    0.20    0.07
  -4 -20  -2    0.13    0.06
  -4  20   2    0.15    0.06
  -4  20   2    0.12    0.05
   4 -20  -2    0.17    0.06
  -4  20  -2    0.24    0.06
  -4 -20   2    0.15    0.06
   4  20   2    0.16    0.07
   4  20   2    0.16    0.04
   4 -20  -2    0.22    0.05
  -4 -20   2    0.15    0.05
  -4  20  -2    0.15    0.07
  -6  20   2    0.15    0.06
  -6 -20  -2   -0.01    0.05
  -6  20   2    0.14    0.06
  -6 -20  -2    0.15    0.06
   6 -20   2    0.13    0.04
   6 -20   2    0.16    0.06
   6  20  -2    0.22    0.08
  -6 -20   2    0.14    0.06
  -6 -20   2    0.22    0.06
  -6  20  -2    0.13    0.05
   6  20   2    0.06    0.03
  -6  20  -2    0.15    0.07
   6 -20  -2    0.15    0.06
   6 -20  -2    0.25    0.05
   6  20   2    0.10    0.06
   8 -20   2    0.37    0.08
  -8  20   2    0.24    0.07
  -8  20   2    0.26    0.07
   8  20  -2    0.40    0.09
  -8 -20  -2    0.25    0.07
  -8 -20  -2    0.31    0.08
  -8  20  -2    0.24    0.08
  -8  20  -2    0.33    0.07
  -8 -20   2    0.32    0.08
  -8 -20   2    0.34    0.08
   8 -20  -2    0.22    0.07
   8 -20  -2    0.32    0.06
   8  20   2    0.29    0.09
 -10  20   2    1.79    0.15
 -10 -20  -2    1.67    0.14
  10  20  -2    1.78    0.16
 -10  20   2    1.83    0.14
  10  20  -2    1.59    0.14
  10 -20   2    1.72    0.15
 -10 -20  -2    1.66    0.15
  10 -20  -2    1.90    0.11
 -10 -20   2    1.65    0.15
 -10  20  -2    1.83    0.14
 -10  20  -2    2.16    0.17
  10 -20  -2    1.56    0.15
  10  20   2    1.46    0.16
  12 -20   2    0.63    0.11
 -12  20   2    0.66    0.10
 -12  20   2    0.55    0.10
  12  20  -2    0.55    0.11
 -12 -20  -2    0.59    0.11
 -12 -20  -2    0.52    0.09
  12  20  -2    0.93    0.12
 -12 -20   2    0.79    0.11
  12  20   2    0.44    0.10
 -12  20  -2    0.73    0.11
 -12  20  -2    0.59    0.10
  12 -20  -2    0.67    0.08
  12 -20  -2    0.43    0.09
  14  20  -2    0.81    0.12
 -14  20   2    0.59    0.10
  14 -20   2    0.54    0.10
 -14  20   2    0.66    0.10
  14  20  -2    0.54    0.11
 -14 -20  -2    0.75    0.13
 -14 -20  -2    0.72    0.11
 -14 -20   2    0.65    0.11
  14  20   2    0.54    0.11
 -14  20  -2    0.55    0.10
 -14  20  -2    0.81    0.12
  14 -20  -2    0.67    0.12
  16 -20   2    1.25    0.15
 -16 -20  -2    1.61    0.16
 -16  20   2    1.61    0.16
  16  20  -2    1.46    0.16
  16  20  -2    1.37    0.17
  16  20   2    1.30    0.16
 -16  20  -2    1.43    0.14
 -16 -20   2    1.68    0.16
  16  20   2    1.19    0.16
  16 -20  -2    1.38    0.15
 -16  20  -2    1.59    0.17
  18  20  -2    0.94    0.14
 -18 -20  -2    1.15    0.14
 -18  20   2    1.06    0.15
  18  20  -2    0.88    0.14
  18 -20   2    1.30    0.16
 -18 -20   2    1.04    0.14
 -18  20  -2    1.00    0.13
  18  20   2    1.07    0.15
 -18  20  -2    1.14    0.14
  18 -20  -2    1.08    0.15
  18  20   2    1.02    0.15
  20  20  -2    0.24    0.10
  20  20  -2    0.34    0.11
  20 -20   2    0.12    0.08
 -20  20   2    0.34    0.10
 -20 -20  -2    0.33    0.09
  20 -20  -2    0.26    0.09
 -20  20  -2    0.26    0.09
  20  20   2    0.19    0.09
 -20 -20   2    0.35    0.11
  20  20   2    0.27    0.10
  22 -20   2    0.87    0.15
  22  20  -2    1.05    0.16
  22  20  -2    1.15    0.16
 -22  20   2    0.95    0.15
 -22 -20  -2    1.01    0.14
 -22 -20   2    1.11    0.16
  22  20   2    0.88    0.16
  22  20   2    0.90    0.15
 -22  20  -2    0.77    0.13
  22 -20  -2    0.90    0.14
 -24  20   2   -0.01    0.08
  24  20  -2    0.07    0.10
  24 -20   2    0.03    0.07
  24  20  -2    0.20    0.09
 -24 -20  -2    0.03    0.08
 -24 -20   2    0.07    0.09
 -24  20  -2    0.23    0.09
  24  20   2    0.15    0.10
  24 -20  -2    0.25    0.10
  24  20   2   -0.03    0.08
  26 -20   2    1.05    0.17
 -26  20   2    0.87    0.15
  26  20  -2    0.97    0.17
  26  20  -2    1.08    0.17
 -26 -20  -2    1.28    0.17
 -26 -20   2    1.29    0.17
  26  20   2    1.09    0.17
 -26  20  -2    1.09    0.16
  26 -20  -2    0.93    0.16
  26  20   2    1.01    0.18
  28 -20   2    0.24    0.12
  28  20  -2    0.31    0.13
  28  20  -2    0.31    0.12
 -28 -20  -2    0.44    0.12
 -28  20   2    0.22    0.12
  28  20   2    0.16    0.12
  28 -20  -2    0.26    0.11
 -28  20  -2    0.25    0.12
 -28 -20   2    0.17    0.11
  28  20   2    0.25    0.12
  30  20  -2    1.64    0.21
  30 -20   2    1.71    0.22
  30  20  -2    1.76    0.23
 -30  20   2    1.78    0.23
 -30 -20   2    1.37    0.20
 -30  20  -2    1.67    0.22
  30  20   2    1.79    0.23
  30 -20  -2    1.77    0.22
  30  20   2    1.72    0.22
  32  20  -2    0.34    0.13
  32  20  -2    0.53    0.15
 -32  20   2    0.52    0.15
  32 -20   2    0.62    0.16
  32  20   2    0.30    0.13
  32 -20  -2    0.26    0.13
 -32 -20   2    0.33    0.14
 -32  20  -2    0.58    0.15
  32  20   2    0.25    0.12
  34 -20   2    0.99    0.19
  34  20  -2    0.76    0.18
 -34  20   2    0.87    0.18
  34 -20  -2    0.78    0.18
 -34 -20   2    0.49    0.16
  34  20   2    0.70    0.17
  34  20   2    0.82    0.18
 -34  20  -2    0.93    0.18
 -36  20   2    0.38    0.16
  36 -20   2    0.06    0.11
  36  20  -2    0.45    0.16
  36 -20  -2    0.05    0.12
 -36  20  -2    0.26    0.15
  36  20   2    0.62    0.17
   0  22   2    7.07    0.30
   0 -22   2    7.30    0.26
   0 -22   2    7.47    0.30
   0 -22  -2    7.14    0.27
   0  22  -2    7.00    0.31
   0  22   2    7.02    0.26
   0 -22  -2    6.99    0.28
   0  22  -2    7.39    0.25
  -2  22   2   92.90    2.13
   2 -22   2   91.96    2.07
   2  22  -2   94.44    2.16
   2 -22   2   92.97    2.01
  -2 -22  -2   88.66    2.05
  -2 -22  -2   90.64    2.05
   2  22  -2   92.88    1.99
  -2  22   2   90.38    2.03
   2 -22  -2   95.54    2.04
   2  22   2   89.94    2.14
   2  22   2   90.44    2.00
  -2  22  -2   91.52    2.15
   2 -22  -2   89.08    2.05
  -2 -22   2   92.52    2.04
  -2 -22   2   90.55    2.06
  -2  22  -2   89.93    2.01
   4 -22   2    0.41    0.06
  -4 -22  -2    0.38    0.08
   4  22  -2    0.43    0.10
   4 -22   2    0.27    0.07
  -4  22   2    0.28    0.07
   4  22  -2    0.33    0.06
  -4 -22  -2    0.11    0.06
  -4  22   2    0.30    0.08
  -4  22  -2    0.51    0.10
  -4 -22   2    0.53    0.10
   4  22   2    0.42    0.07
  -4 -22   2    0.31    0.07
   4  22   2    0.41    0.10
   4 -22  -2    0.42    0.07
   4 -22  -2    0.38    0.09
  -4  22  -2    0.33    0.07
   6 -22   2  113.32    2.49
   6  22  -2  110.31    2.59
  -6 -22  -2  110.78    2.46
  -6 -22  -2  111.46    2.49
  -6  22   2  111.44    2.54
  -6  22   2  109.22    2.46
  -6 -22   2  111.50    2.47
  -6 -22   2  113.51    2.49
   6 -22  -2  112.30    2.43
   6 -22  -2  109.68    2.48
  -6  22  -2  114.67    2.58
  -6  22  -2  109.43    2.44
   6  22   2  109.94    2.58
   8 -22   2    3.55    0.21
  -8  22   2    3.82    0.20
  -8 -22  -2    3.49    0.20
   8  22  -2    3.45    0.22
  -8 -22  -2    3.22    0.20
  -8  22   2    3.40    0.20
   8  22   2    3.46    0.22
  -8  22  -2    3.12    0.20
  -8 -22   2    3.38    0.20
   8 -22  -2    3.66    0.21
  -8 -22   2    3.52    0.20
   8 -22  -2    3.37    0.16
  -8  22  -2    3.82    0.20
  10 -22   2   38.66    1.00
 -10 -22  -2   38.84    1.01
 -10  22   2   37.85    0.97
 -10  22   2   37.48    0.98
  10  22  -2   37.87    1.04
 -10 -22  -2   38.52    0.97
  10  22   2   36.65    1.03
 -10 -22   2   39.59    1.00
 -10 -22   2   38.23    0.98
  10 -22  -2   37.85    0.99
 -10  22  -2   38.69    0.97
 -10  22  -2   41.11    1.03
 -12 -22  -2    1.39    0.14
  12  22  -2    1.12    0.14
 -12  22   2    1.03    0.13
  12  22  -2    1.17    0.16
 -12  22   2    1.02    0.12
  12 -22   2    1.19    0.14
 -12  22  -2    1.35    0.14
  12 -22  -2    1.05    0.13
  12  22   2    1.13    0.15
 -12  22  -2    1.00    0.14
 -14 -22  -2   37.24    1.01
  14 -22   2   36.26    0.98
  14  22  -2   37.65    0.97
 -14  22   2   35.78    0.95
  14  22  -2   35.10    1.02
 -14 -22  -2   37.60    0.95
 -14  22   2   36.71    0.97
 -14 -22   2   37.31    0.96
  14 -22  -2   37.83    0.99
 -14  22  -2   38.74    0.99
 -14  22  -2   37.07    0.96
  14  22   2   35.25    1.02
 -16 -22  -2    1.24    0.14
  16  22  -2    1.00    0.15
 -16 -22  -2    1.38    0.18
  16  22  -2    1.02    0.14
  16 -22   2    1.04    0.15
 -16  22   2    1.04    0.14
 -16 -22   2    1.08    0.15
  16  22   2    1.26    0.16
  16 -22  -2    1.20    0.16
 -16  22  -2    1.01    0.14
 -16  22  -2    1.31    0.15
  18  22  -2   50.78    1.29
 -18 -22  -2   50.92    1.25
  18  22  -2   49.09    1.33
  18 -22   2   50.90    1.29
 -18  22   2   51.24    1.28
 -18 -22  -2   49.94    1.33
  18 -22  -2   49.27    1.28
  18  22   2   48.91    1.33
 -18  22  -2   51.21    1.27
 -18 -22   2   51.85    1.27
 -20  22   2    0.74    0.14
 -20 -22  -2    1.04    0.14
  20 -22   2    0.83    0.14
  20  22  -2    0.78    0.14
  20  22  -2    0.64    0.13
  20 -22  -2    0.55    0.12
  20  22   2    0.65    0.14
 -20 -22   2    0.65    0.13
 -20  22  -2    0.90    0.14
  20  22   2    0.76    0.14
  22 -22   2   17.09    0.59
 -22  22   2   17.65    0.59
  22  22  -2   17.04    0.60
  22  22  -2   17.13    0.60
 -22 -22  -2   16.50    0.55
  22 -22  -2   16.02    0.58
 -22 -22   2   16.55    0.56
  22  22   2   16.02    0.60
 -22  22  -2   16.22    0.57
  22  22   2   16.70    0.60
  24  22  -2    0.27    0.12
  24  22  -2    0.47    0.13
 -24  22   2    0.31    0.11
 -24 -22  -2    0.36    0.11
  24 -22   2    0.30    0.11
  24  22   2    0.52    0.13
 -24 -22   2    0.15    0.10
  24 -22  -2    0.38    0.11
  24  22   2    0.45    0.13
 -24  22  -2    0.50    0.12
  26  22  -2    8.29    0.41
 -26 -22  -2    8.34    0.38
  26 -22   2    8.36    0.41
  26  22  -2    9.34    0.44
 -26  22   2    8.19    0.40
  26  22   2    8.22    0.42
 -26 -22   2    8.57    0.39
  26 -22  -2    8.27    0.41
  26  22   2    8.31    0.42
 -26  22  -2    8.69    0.41
  28 -22   2    0.56    0.14
  28  22  -2    0.49    0.14
  28  22  -2    0.14    0.11
 -28  22   2    0.15    0.12
 -28 -22   2    0.25    0.12
  28  22   2    0.53    0.14
 -28  22  -2    0.29    0.12
  28 -22  -2    0.54    0.13
  28  22   2    0.40    0.14
  30 -22   2   13.01    0.56
 -30  22   2   13.32    0.55
  30  22  -2   14.06    0.57
  30  22  -2   13.65    0.58
  30 -22  -2   14.46    0.58
 -30  22  -2   15.07    0.58
  30  22   2   13.51    0.58
 -30 -22   2   12.87    0.53
  30  22   2   12.46    0.56
  32  22  -2    0.60    0.17
 -32  22   2    0.67    0.17
  32  22  -2    0.62    0.15
  32 -22   2    0.70    0.16
 -32 -22   2    0.40    0.14
 -32  22  -2    0.83    0.18
  32 -22  -2    0.59    0.15
  32  22   2    0.37    0.16
  32  22   2    0.71    0.17
  34  22  -2    4.05    0.34
  34  22  -2    3.96    0.33
 -34  22   2    3.93    0.32
  34 -22   2    4.12    0.32
  34  22   2    4.54    0.35
  34  22   2    4.16    0.32
  34 -22  -2    4.27    0.32
 -34  22  -2    4.08    0.33
  36 -22   2    0.12    0.13
  36  22   2    0.21    0.14
   0  24   2    0.06    0.06
   0  24  -2    0.03    0.04
   0 -24   2    0.04    0.06
   0 -24  -2   -0.04    0.05
   0  24   2   -0.03    0.04
   0 -24  -2    0.01    0.05
   0 -24   2    0.02    0.05
   0  24  -2    0.11    0.07
   2  24  -2    0.14    0.05
   2 -24   2    0.04    0.06
   2 -24   2    0.10    0.05
  -2  24   2    0.11    0.07
  -2  24   2    0.02    0.05
  -2 -24  -2    0.04    0.06
   2  24  -2    0.20    0.09
  -2 -24  -2   -0.01    0.06
  -2 -24   2    0.14    0.07
  -2 -24   2    0.02    0.05
  -2  24  -2    0.03    0.07
   2  24   2    0.06    0.06
   2  24   2    0.02    0.04
   2 -24  -2    0.07    0.05
  -2  24  -2    0.07    0.05
   2 -24  -2    0.01    0.06
  -4 -24  -2    0.05    0.06
  -4  24   2    0.16    0.07
   4  24  -2   -0.05    0.06
  -4 -24  -2    0.14    0.07
  -4  24   2   -0.01    0.06
   4 -24   2   -0.04    0.06
  -4 -24   2    0.18    0.07
   4 -24  -2    0.10    0.07
   4  24   2    0.09    0.07
   4 -24  -2    0.04    0.05
  -4 -24   2    0.04    0.05
  -4  24  -2    0.05    0.07
  -4  24  -2    0.00    0.05
  -6 -24  -2    0.36    0.09
   6  24  -2    0.31    0.10
   6 -24   2    0.29    0.09
  -6  24   2    0.35    0.09
  -6  24   2    0.36    0.09
  -6 -24  -2    0.37    0.09
   6 -24  -2    0.43    0.10
   6 -24  -2    0.44    0.07
  -6 -24   2    0.31    0.09
  -6  24  -2    0.22    0.08
  -6 -24   2    0.39    0.09
   6  24   2    0.26    0.09
  -6  24  -2    0.40    0.09
  -8  24   2    0.16    0.08
  -8  24   2    0.08    0.07
   8  24  -2    0.18    0.09
  -8 -24  -2    0.04    0.06
  -8 -24  -2    0.08    0.07
   8 -24   2    0.11    0.08
  -8  24  -2    0.13    0.08
  -8  24  -2    0.12    0.07
   8 -24  -2    0.16    0.08
  -8 -24   2    0.26    0.09
   8  24   2    0.07    0.07
  -8 -24   2    0.17    0.08
  10  24  -2    2.06    0.19
 -10  24   2    2.38    0.18
  10 -24   2    2.38    0.19
 -10 -24  -2    2.42    0.19
 -10  24   2    2.48    0.18
 -10 -24  -2    2.78    0.19
 -10  24  -2    2.66    0.20
  10 -24  -2    2.86    0.20
 -10 -24   2    2.46    0.19
 -10  24  -2    2.83    0.19
  10  24   2    2.14    0.19
 -10 -24   2    2.33    0.19
 -12 -24  -2   -0.09    0.06
  12 -24   2    0.04    0.07
  12  24  -2    0.12    0.09
 -12 -24  -2    0.15    0.08
 -12  24   2    0.13    0.07
 -12  24   2    0.08    0.07
 -12 -24   2    0.15    0.09
 -12  24  -2    0.03    0.07
 -12  24  -2    0.13    0.07
  12  24   2    0.01    0.07
  12 -24  -2    0.09    0.08
 -12 -24   2   -0.03    0.07
 -14  24   2    1.60    0.17
  14  24  -2    1.65    0.20
 -14 -24  -2    1.59    0.18
 -14 -24  -2    1.76    0.18
  14 -24   2    1.64    0.18
 -14  24  -2    1.54    0.18
 -14 -24   2    1.63    0.17
 -14  24  -2    1.67    0.18
  14  24   2    1.30    0.17
  14 -24  -2    1.26    0.16
 -14 -24   2    1.83    0.20
 -16  24   2    0.72    0.13
  16  24  -2    0.72    0.14
 -16 -24  -2    0.78    0.15
  16 -24   2    0.70    0.13
 -16 -24  -2    0.59    0.12
  16  24  -2    0.83    0.15
 -16  24  -2    0.63    0.12
  16 -24  -2    0.54    0.12
 -16 -24   2    0.69    0.12
 -16  24  -2    0.87    0.13
  16  24   2    0.65    0.13
  18  24  -2    1.57    0.19
  18 -24   2    1.67    0.19
  18  24  -2    1.66    0.21
 -18  24   2    1.54    0.19
 -18 -24  -2    1.79    0.17
 -18 -24  -2    1.84    0.21
  18  24   2    1.15    0.17
 -18  24  -2    1.56    0.19
 -18 -24   2    1.39    0.17
  18 -24  -2    1.70    0.20
 -20 -24  -2    0.01    0.08
 -20  24   2    0.02    0.09
  20  24  -2   -0.02    0.08
 -20 -24  -2    0.17    0.10
  20  24  -2    0.04    0.09
  20 -24   2    0.09    0.08
 -20 -24   2    0.08    0.09
  20  24   2   -0.01    0.08
  20 -24  -2   -0.01    0.08
 -20  24  -2   -0.02    0.07
 -22 -24  -2    0.99    0.15
  22  24  -2    0.68    0.15
 -22 -24  -2    0.97    0.18
  22  24  -2    1.13    0.18
 -22  24   2    1.00    0.16
  22 -24   2    0.88    0.15
 -22  24  -2    0.81    0.15
 -22 -24   2    1.15    0.17
  22 -24  -2    1.06    0.17
  22  24   2    1.14    0.18
  24  24  -2    0.02    0.11
  24  24  -2    0.15    0.10
 -24  24   2    0.09    0.10
 -24 -24  -2    0.19    0.10
  24 -24   2    0.09    0.10
 -24 -24  -2    0.09    0.10
 -24  24  -2   -0.03    0.08
 -24 -24   2    0.05    0.10
  24  24   2    0.17    0.11
  24 -24  -2   -0.03    0.08
 -26  24   2    1.66    0.22
  26  24  -2    0.94    0.18
  26 -24   2    1.53    0.21
 -26 -24  -2    1.28    0.21
  26  24  -2    1.53    0.21
 -26  24  -2    1.45    0.20
  26 -24  -2    1.62    0.21
 -26 -24   2    1.57    0.20
  26  24   2    1.25    0.20
  28 -24   2    0.17    0.10
 -28 -24  -2   -0.05    0.10
 -28  24   2    0.02    0.11
  28  24  -2    0.07    0.12
  28  24  -2    0.09    0.11
  28 -24  -2    0.04    0.10
 -28 -24   2    0.24    0.12
 -28  24  -2    0.11    0.11
  28  24   2   -0.04    0.08
 -30  24   2    0.72    0.17
  30  24  -2    0.78    0.17
  30 -24   2    0.94    0.18
 -30 -24  -2    0.99    0.20
  30  24  -2    0.81    0.18
 -30 -24   2    1.03    0.18
  30 -24  -2    0.77    0.17
  30  24   2    1.06    0.20
 -30  24  -2    1.45    0.21
  32  24  -2    0.06    0.12
 -32  24   2   -0.11    0.11
  32 -24   2    0.01    0.11
  32  24  -2   -0.09    0.09
 -32 -24  -2   -0.01    0.11
  32 -24  -2    0.22    0.12
  32  24   2    0.05    0.11
 -32  24  -2    0.20    0.13
 -34  24   2    1.17    0.22
  34  24  -2    1.18    0.23
  34 -24   2    1.07    0.20
  34  24  -2    1.36    0.22
 -34 -24  -2    0.76    0.20
 -34  24  -2    0.70    0.19
  34  24   2    1.18    0.21
  34 -24  -2    1.03    0.20
   0  26  -2    3.08    0.22
   0 -26   2    3.28    0.21
   0 -26   2    3.09    0.17
   0  26   2    3.25    0.18
   0 -26  -2    2.91    0.20
   0  26   2    3.23    0.21
   0 -26  -2    3.22    0.18
   0  26  -2    3.24    0.17
  -2  26   2   44.35    1.06
  -2 -26  -2   41.54    1.08
   2 -26   2   42.65    1.10
  -2  26   2   41.29    1.12
  -2 -26  -2   42.67    1.07
   2  26  -2   44.84    1.16
  -2 -26   2   42.17    1.09
   2 -26  -2   43.06    1.04
  -2  26  -2   44.54    1.05
  -2 -26   2   43.03    1.05
   2  26   2   41.48    1.13
  -2  26  -2   42.77    1.14
   2 -26  -2   42.53    1.09
   4  26  -2    0.26    0.10
  -4 -26  -2    0.33    0.09
  -4  26   2    0.13    0.08
  -4  26   2    0.18    0.08
  -4 -26  -2    0.24    0.08
   4 -26   2    0.14    0.08
  -4 -26   2    0.17    0.07
  -4  26  -2    0.42    0.11
   4  26   2    0.11    0.09
  -4 -26   2    0.30    0.09
  -4  26  -2    0.06    0.06
   4 -26  -2    0.15    0.08
   6 -26   2   29.34    0.81
  -6  26   2   27.69    0.80
  -6 -26  -2   28.64    0.79
  -6  26   2   29.42    0.79
   6  26  -2   28.67    0.85
  -6 -26  -2   29.09    0.79
  -6 -26   2   28.33    0.78
  -6 -26   2   29.82    0.81
  -6  26  -2   29.51    0.83
  -6  26  -2   28.54    0.77
   6 -26  -2   29.10    0.81
   6  26   2   27.22    0.84
   8 -26   2    0.38    0.11
  -8  26   2    0.34    0.09
  -8 -26  -2    0.46    0.10
  -8 -26  -2    0.60    0.11
  -8  26   2    0.43    0.10
   8  26  -2    0.44    0.11
  -8 -26   2    0.23    0.09
  -8 -26   2    0.31    0.10
  -8  26  -2    0.53    0.10
  -8  26  -2    0.50    0.12
   8  26   2    0.48    0.11
   8 -26  -2    0.43    0.11
 -10 -26  -2   45.58    1.19
 -10  26   2   45.18    1.17
  10  26  -2   46.86    1.24
 -10 -26  -2   46.81    1.16
 -10  26   2   45.85    1.17
  10 -26   2   45.98    1.19
 -10  26  -2   45.06    1.20
 -10 -26   2   47.70    1.19
 -10  26  -2   46.64    1.15
  10 -26  -2   45.93    1.18
 -10 -26   2   47.38    1.18
  10  26   2   42.31    1.22
 -12 -26  -2    0.60    0.11
  12 -26   2    0.83    0.14
 -12  26   2    0.89    0.14
 -12  26   2    0.84    0.12
 -12 -26  -2    0.68    0.13
  12  26  -2    0.76    0.14
 -12 -26   2    0.49    0.11
 -12  26  -2    0.83    0.12
 -12  26  -2    0.92    0.13
  12  26   2    1.01    0.16
  12 -26  -2    0.69    0.13
 -12 -26   2    1.04    0.15
 -14  26   2   33.92    0.93
  14 -26   2   33.87    0.95
  14  26  -2   34.06    0.99
 -14 -26  -2   33.19    0.91
 -14 -26  -2   33.89    0.96
  14 -26  -2   33.17    0.94
 -14 -26   2   35.13    0.94
 -14 -26   2   33.97    0.96
 -14  26  -2   34.38    0.93
 -14  26  -2   35.91    0.95
  14  26   2   30.73    0.97
  16  26  -2    0.46    0.12
 -16 -26  -2    0.53    0.12
  16 -26   2    0.47    0.12
 -16 -26  -2    0.41    0.12
 -16  26   2    0.73    0.13
  16  26   2    0.20    0.11
 -16 -26   2    0.37    0.11
 -16 -26   2    0.21    0.10
  16 -26  -2    0.61    0.13
 -16  26  -2    0.80    0.13
 -18 -26  -2   22.65    0.75
  18 -26   2   23.89    0.74
 -18 -26  -2   22.48    0.69
  18  26  -2   22.68    0.76
 -18  26   2   22.51    0.71
  18 -26  -2   21.95    0.72
 -18 -26   2   23.95    0.76
 -18  26  -2   22.36    0.71
  18  26   2   20.88    0.74
 -18 -26   2   23.45    0.72
 -20  26   2    0.52    0.13
  20 -26   2    0.52    0.13
 -20 -26  -2    0.94    0.16
  20  26  -2    0.46    0.13
 -20 -26  -2    0.50    0.12
  20  26  -2    0.54    0.14
  20  26   2    0.36    0.13
 -20 -26   2    0.64    0.14
 -20 -26   2    0.70    0.13
  20 -26  -2    0.73    0.14
 -20  26  -2    0.48    0.12
 -22 -26  -2   12.21    0.47
 -22 -26  -2   11.92    0.53
  22  26  -2   11.54    0.51
 -22  26   2   11.65    0.49
  22  26  -2   11.95    0.51
  22 -26   2   11.71    0.50
  22 -26  -2   12.21    0.51
 -22 -26   2   13.07    0.49
 -22  26  -2   12.72    0.50
  22  26   2   11.14    0.51
  24  26  -2    0.34    0.14
  24  26  -2    0.72    0.16
  24 -26   2    1.11    0.18
 -24 -26  -2    0.83    0.18
 -24  26   2    0.71    0.15
  24 -26  -2    0.55    0.14
  24  26   2    0.58    0.15
 -24 -26   2    0.64    0.14
 -24  26  -2    0.83    0.16
  26  26  -2   21.23    0.76
  26  26  -2   22.80    0.77
 -26 -26  -2   20.50    0.79
  26 -26   2   21.55    0.75
 -26  26   2   22.33    0.76
  26 -26  -2   21.20    0.75
  26  26   2   21.14    0.77
 -26 -26   2   21.58    0.72
 -26  26  -2   22.02    0.75
 -28 -26  -2    0.36    0.14
  28  26  -2    0.28    0.13
  28  26  -2    0.07    0.13
 -28  26   2    0.41    0.14
  28 -26   2    0.37    0.14
  28  26   2    0.25    0.12
 -28 -26   2    0.26    0.13
 -28  26  -2    0.60    0.15
  28 -26  -2    0.41    0.14
  30  26  -2    6.39    0.39
 -30  26   2    6.84    0.41
 -30 -26  -2    5.78    0.41
  30  26  -2    6.46    0.41
  30 -26   2    6.74    0.40
 -30  26  -2    6.92    0.40
  30  26   2    5.85    0.38
  30 -26  -2    5.94    0.38
 -32  26   2    0.19    0.14
  32 -26   2    0.20    0.13
  32  26  -2    0.43    0.16
 -32 -26  -2    0.24    0.14
  32  26  -2    0.14    0.12
 -32  26  -2    0.21    0.14
  32  26   2    0.20    0.13
  32 -26  -2    0.17    0.11
  34  26  -2    5.42    0.37
  34  26   2    4.24    0.35
   0 -28   2    0.11    0.07
   0 -28  -2    0.10    0.07
   0 -28  -2    0.13    0.07
   0  28   2   -0.03    0.07
   0  28  -2   -0.08    0.07
  -2 -28  -2    0.64    0.11
  -2 -28  -2    0.45    0.11
   2 -28   2    0.43    0.10
   2  28  -2    0.51    0.12
  -2  28   2    0.62    0.13
  -2  28   2    0.55    0.10
  -2 -28   2    0.49    0.11
   2  28   2    0.43    0.12
  -2  28  -2    0.53    0.13
   2 -28  -2    0.54    0.11
  -2  28  -2    0.50    0.09
  -4 -28  -2    0.25    0.09
  -4 -28  -2    0.15    0.08
   4  28  -2    0.03    0.08
  -4  28   2    0.16    0.08
   4 -28   2    0.38    0.11
  -4  28   2    0.15    0.08
  -4 -28   2    0.43    0.11
  -4  28  -2    0.18    0.07
   4 -28  -2    0.07    0.08
   4  28   2    0.23    0.10
  -4  28  -2    0.25    0.10
  -4 -28   2    0.26    0.08
   6 -28   2    0.70    0.13
  -6  28   2    0.49    0.11
  -6  28   2    0.61    0.11
  -6 -28  -2    0.60    0.11
  -6 -28  -2    0.41    0.10
   6  28  -2    0.78    0.15
  -6  28  -2    0.85    0.12
  -6 -28   2    0.65    0.11
  -6 -28   2    0.95    0.14
  -6  28  -2    0.87    0.14
   6  28   2    0.63    0.13
   6 -28  -2    0.63    0.12
  -8 -28  -2    0.06    0.07
  -8  28   2   -0.01    0.07
  -8 -28  -2    0.10    0.08
   8 -28   2    0.02    0.07
  -8  28   2    0.01    0.07
   8  28  -2   -0.02    0.07
  -8  28  -2    0.08    0.07
   8 -28  -2    0.08    0.07
   8  28   2   -0.01    0.08
  -8 -28   2    0.07    0.08
  -8 -28   2    0.10    0.07
  -8  28  -2    0.11    0.09
 -10 -28  -2    0.29    0.09
 -10  28   2    0.07    0.07
 -10  28   2    0.23    0.09
  10 -28   2    0.17    0.09
  10  28  -2    0.13    0.09
 -10 -28  -2    0.21    0.09
  10  28   2    0.30    0.11
 -10 -28   2    0.45    0.11
 -10  28  -2    0.29    0.10
  10 -28  -2    0.20    0.09
 -10  28  -2    0.30    0.09
 -10 -28   2    0.21    0.09
 -12  28   2    1.76    0.20
  12 -28   2    1.97    0.21
 -12 -28  -2    1.94    0.20
 -12 -28  -2    1.77    0.20
  12  28  -2    1.62    0.20
  12  28   2    1.63    0.20
  12 -28  -2    1.77    0.20
 -12  28  -2    1.67    0.19
 -12 -28   2    2.23    0.21
 -12  28  -2    1.85    0.19
 -12 -28   2    1.97    0.20
 -14 -28  -2    0.15    0.09
  14  28  -2    0.03    0.09
  14 -28   2    0.13    0.09
 -14 -28  -2    0.10    0.09
 -14  28   2    0.10    0.08
  14  28   2    0.03    0.08
 -14 -28   2    0.11    0.09
 -14  28  -2    0.14    0.09
 -14 -28   2    0.20    0.10
  14 -28  -2    0.11    0.09
 -14  28  -2    0.12    0.09
 -16  28   2    0.02    0.08
 -16 -28  -2    0.06    0.09
  16 -28   2    0.05    0.08
 -16 -28  -2    0.17    0.10
  16  28  -2    0.24    0.11
  16 -28  -2    0.13    0.08
  16  28   2    0.09    0.09
 -16 -28   2    0.05    0.09
 -16  28  -2    0.08    0.08
 -16 -28   2    0.08    0.09
 -18 -28  -2    0.38    0.12
  18  28  -2    0.28    0.12
 -18  28   2    0.73    0.15
 -18 -28  -2    0.76    0.16
  18 -28   2    0.45    0.12
 -18 -28   2    0.67    0.15
 -18 -28   2    0.71    0.14
  18  28   2    0.33    0.13
  18 -28  -2    0.48    0.13
 -18  28  -2    0.54    0.13
 -20 -28  -2    0.38    0.14
 -20  28   2    0.20    0.11
 -20 -28  -2    0.40    0.12
  20 -28   2    0.22    0.11
  20  28  -2    0.18    0.11
 -20 -28   2    0.31    0.12
 -20 -28   2    0.20    0.11
  20 -28  -2    0.46    0.14
  20  28   2    0.22    0.13
 -20  28  -2    0.21    0.11
 -22 -28  -2    1.16    0.22
  22 -28   2    0.99    0.18
  22  28  -2    1.05    0.19
 -22  28   2    1.07    0.18
 -22 -28   2    1.06    0.17
  22 -28  -2    0.88    0.17
 -22 -28   2    1.19    0.19
  22  28   2    0.97    0.18
 -22  28  -2    1.25    0.19
  24 -28   2    0.17    0.11
 -24 -28  -2    0.16    0.12
  24  28  -2    0.00    0.10
 -24  28   2    0.06    0.11
  24  28   2    0.05    0.10
 -24 -28   2    0.18    0.11
  24 -28  -2    0.16    0.11
 -24  28  -2    0.11    0.11
 -24 -28   2    0.12    0.11
 -26 -28  -2    0.98    0.20
  26 -28   2    1.24    0.21
  26  28  -2    1.22    0.21
 -26  28   2    1.38    0.21
 -26 -28   2    1.69    0.22
 -26 -28   2    1.31    0.22
  26 -28  -2    1.07    0.19
  26  28   2    1.17    0.20
 -26  28  -2    1.42    0.21
  28 -28   2    0.40    0.15
  28  28  -2    0.46    0.16
 -28  28   2    0.34    0.15
 -28 -28  -2    0.46    0.17
 -28 -28   2    0.28    0.15
  28 -28  -2    0.54    0.15
 -28  28  -2    0.56    0.16
  28  28   2    0.48    0.16
 -30 -28  -2    0.53    0.18
  30 -28   2    0.79    0.18
 -30  28   2    0.58    0.18
  30  28  -2    0.32    0.14
  30 -28  -2    0.61    0.16
 -30 -28   2    0.39    0.15
 -30  28  -2    0.55    0.16
  30  28   2    0.48    0.16
  32  28  -2   -0.04    0.10
  32  28   2    0.14    0.14
   0  30  -2    2.09    0.22
   0 -30   2    2.19    0.21
   0 -30  -2    2.19    0.21
   0  30   2    2.12    0.22
   2  30  -2   46.94    1.24
   2 -30   2   44.63    1.18
  -2  30   2   44.19    1.20
  -2 -30  -2   44.25    1.16
  -2  30  -2   46.74    1.23
   2 -30  -2   45.27    1.18
  -2 -30   2   43.54    1.17
   2  30   2   44.73    1.22
  -4 -30  -2    0.31    0.10
   4  30  -2    0.25    0.11
  -4  30   2    0.32    0.11
   4 -30   2    0.57    0.12
  -4  30   2    0.46    0.10
  -4 -30  -2    0.52    0.11
  -4  30  -2    0.26    0.11
   4 -30  -2    0.35    0.10
   4  30   2    0.31    0.11
  -4 -30   2    0.53    0.12
   6  30  -2   34.50    1.03
   6 -30   2   36.59    1.00
  -6  30   2   35.06    0.99
  -6 -30  -2   35.46    0.97
  -6 -30  -2   34.27    0.96
  -6  30   2   37.82    0.96
  -6  30  -2   37.38    0.95
   6 -30  -2   34.28    0.98
  -6 -30   2   35.24    0.95
  -6  30  -2   36.21    1.01
  -6 -30   2   36.79    0.99
   6  30   2   34.38    1.02
   8  30  -2    1.08    0.17
  -8  30   2    0.92    0.14
  -8 -30  -2    0.91    0.14
   8 -30   2    1.42    0.18
  -8  30   2    1.12    0.15
  -8 -30  -2    1.07    0.15
   8  30   2    1.22    0.18
  -8  30  -2    1.17    0.17
  -8  30  -2    1.29    0.15
  -8 -30   2    1.07    0.15
   8 -30  -2    1.12    0.16
  10 -30   2   38.90    1.08
  10  30  -2   39.57    1.13
 -10 -30  -2   38.61    1.07
 -10  30   2   39.38    1.05
 -10 -30  -2   39.92    1.05
 -10  30   2   39.51    1.06
 -10 -30   2   39.09    1.06
 -10  30  -2   39.59    1.08
  10 -30  -2   37.21    1.06
 -10  30  -2   40.29    1.04
 -10 -30   2   39.36    1.06
  10  30   2   36.75    1.11
  12  30  -2    0.83    0.17
 -12 -30  -2    1.20    0.16
  12 -30   2    0.85    0.15
 -12  30   2    0.76    0.14
 -12 -30  -2    0.92    0.15
  12 -30  -2    0.97    0.16
 -12  30  -2    1.06    0.15
 -12  30  -2    0.75    0.14
 -12 -30   2    1.04    0.16
 -12 -30   2    1.18    0.17
  12  30   2    0.94    0.17
 -14 -30  -2   14.84    0.57
  14 -30   2   14.86    0.57
 -14  30   2   15.70    0.56
  14  30  -2   15.67    0.61
 -14 -30  -2   16.23    0.55
  14  30   2   14.65    0.59
 -14  30  -2   15.64    0.55
 -14 -30   2   15.31    0.56
 -14 -30   2   15.48    0.57
  14 -30  -2   15.23    0.57
 -16  30   2    0.77    0.15
 -16 -30  -2    0.63    0.14
 -16 -30  -2    0.94    0.15
  16  30  -2    0.67    0.15
  16 -30   2    1.01    0.17
  16 -30  -2    0.59    0.14
  16  30   2    1.28    0.20
 -16  30  -2    0.82    0.15
 -16 -30   2    0.78    0.15
 -16 -30   2    0.69    0.15
  18  30  -2   17.34    0.66
 -18 -30  -2   17.72    0.60
  18 -30   2   15.79    0.61
 -18  30   2   17.39    0.62
 -18 -30  -2   16.39    0.64
 -18 -30   2   17.15    0.61
 -18 -30   2   17.86    0.65
  18  30   2   16.38    0.65
 -18  30  -2   17.30    0.62
  18 -30  -2   17.71    0.63
  20  30  -2    0.78    0.18
 -20  30   2    0.77    0.17
  20 -30   2    0.58    0.14
 -20 -30  -2    0.58    0.16
 -20  30  -2    0.64    0.15
 -20 -30   2    0.57    0.15
  20 -30  -2    0.52    0.14
  20  30   2    0.89    0.18
 -20 -30   2    0.65    0.14
  22  30  -2   13.23    0.57
 -22  30   2   12.95    0.54
 -22 -30  -2   11.82    0.55
  22 -30   2   12.40    0.54
 -22 -30   2   12.50    0.56
  22  30   2   12.29    0.56
 -22  30  -2   12.56    0.53
 -22 -30   2   12.82    0.52
  22 -30  -2   13.33    0.55
 -24  30   2    0.69    0.16
 -24 -30  -2    0.65    0.17
  24  30  -2    0.74    0.18
  24 -30   2    0.36    0.13
 -24  30  -2    0.71    0.17
  24 -30  -2    0.68    0.17
 -24 -30   2    0.46    0.15
 -24 -30   2    0.92    0.19
  24  30   2    0.71    0.18
  26 -30   2    9.20    0.47
  26  30  -2    9.76    0.49
 -26  30   2    9.80    0.49
 -26 -30  -2    8.40    0.49
  26  30   2    8.41    0.47
  26 -30  -2    8.83    0.47
 -26 -30   2    8.64    0.49
 -26  30  -2    9.66    0.47
 -28 -30  -2    0.36    0.17
 -28  30   2    0.16    0.13
  28 -30   2    0.24    0.13
  28  30  -2    0.31    0.14
  28 -30  -2    0.39    0.15
 -28  30  -2    0.55    0.17
  28  30   2    0.49    0.15
 -28 -30   2    0.15    0.14
  30  30  -2    1.42    0.23
  30  30   2    1.65    0.25
   0  32  -2    0.05    0.09
   0  32   2    0.03    0.08
   0 -32  -2    0.00    0.08
   0 -32   2    0.19    0.09
  -2 -32  -2    0.04    0.08
   2 -32   2   -0.05    0.08
   2  32  -2    0.00    0.09
  -2  32   2    0.01    0.09
  -2  32  -2    0.06    0.09
  -2 -32   2    0.09    0.08
   2  32   2   -0.03    0.09
   2 -32  -2    0.07    0.08
  -4  32   2    0.12    0.09
   4 -32   2   -0.04    0.09
   4  32  -2   -0.01    0.08
  -4 -32  -2    0.01    0.08
   4  32   2   -0.02    0.08
  -4 -32   2    0.07    0.08
   4 -32  -2    0.14    0.09
  -4  32  -2    0.07    0.09
  -6 -32  -2   -0.03    0.08
   6 -32   2   -0.03    0.07
  -6  32   2   -0.08    0.08
  -6 -32  -2    0.07    0.08
  -6  32   2   -0.01    0.07
   6  32  -2   -0.07    0.08
   6 -32  -2    0.12    0.10
  -6 -32   2    0.03    0.09
  -6  32  -2   -0.05    0.08
   6  32   2    0.13    0.10
  -8  32   2   -0.12    0.07
  -8  32   2    0.08    0.10
  -8 -32  -2   -0.05    0.07
  -8 -32  -2    0.03    0.08
   8 -32   2   -0.02    0.08
   8  32  -2   -0.07    0.08
   8  32   2    0.06    0.09
  -8  32  -2    0.16    0.10
   8 -32  -2    0.14    0.09
  -8  32  -2    0.10    0.08
  -8 -32   2    0.01    0.08
  10 -32   2    0.03    0.09
 -10 -32  -2   -0.03    0.08
 -10 -32  -2    0.13    0.10
  10  32  -2    0.01    0.10
 -10  32   2    0.16    0.10
  10 -32  -2    0.00    0.08
 -10 -32   2   -0.02    0.09
 -10  32  -2   -0.01    0.08
 -10 -32   2    0.01    0.08
  10  32   2    0.05    0.10
 -10  32  -2    0.13    0.10
  12  32  -2    0.18    0.12
 -12  32   2   -0.01    0.09
  12 -32   2    0.22    0.11
 -12 -32  -2    0.31    0.11
 -12 -32  -2    0.04    0.09
  12 -32  -2    0.05    0.10
 -12  32  -2    0.03    0.09
  12  32   2    0.13    0.11
 -12 -32   2    0.11    0.09
 -12  32  -2    0.21    0.10
 -12 -32   2    0.06    0.09
 -14 -32  -2    0.33    0.13
 -14  32   2    0.12    0.10
 -14 -32  -2    0.22    0.11
  14  32  -2    0.12    0.11
  14 -32   2    0.18    0.10
 -14 -32   2    0.21    0.11
  14 -32  -2    0.42    0.13
 -14  32  -2    0.12    0.09
  14  32   2    0.24    0.13
 -14 -32   2    0.09    0.10
  16  32  -2    0.66    0.16
 -16 -32  -2    0.86    0.16
  16 -32   2    0.73    0.15
 -16  32   2    0.70    0.16
 -16 -32  -2    0.55    0.15
  16 -32  -2    0.82    0.16
 -16  32  -2    0.74    0.15
 -16 -32   2    0.52    0.15
 -16 -32   2    0.84    0.16
  16  32   2    0.68    0.16
 -18  32   2    0.90    0.17
  18  32  -2    0.87    0.18
 -18 -32  -2    0.79    0.17
  18 -32   2    0.87    0.18
 -18 -32   2    1.04    0.18
  18  32   2    1.05    0.20
 -18  32  -2    0.67    0.15
 -18 -32   2    0.94    0.18
  18 -32  -2    0.81    0.17
 -20  32   2    1.12    0.19
 -20 -32  -2    1.10    0.21
  20  32  -2    1.48    0.22
  20 -32   2    1.07    0.19
 -20  32  -2    1.49    0.21
 -20 -32   2    1.03    0.19
 -20 -32   2    1.25    0.20
  20  32   2    0.90    0.18
  20 -32  -2    1.21    0.20
 -22 -32  -2    1.57    0.24
  22 -32   2    1.64    0.23
 -22  32   2    1.52    0.23
  22  32  -2    1.42    0.23
 -22  32  -2    1.96    0.25
  22 -32  -2    1.75    0.24
 -22 -32   2    1.34    0.24
  22  32   2    1.72    0.24
 -22 -32   2    1.90    0.24
  24  32  -2    0.06    0.12
  24 -32   2    0.07    0.11
 -24 -32  -2    0.09    0.12
 -24  32   2    0.02    0.10
  24 -32  -2    0.10    0.12
 -24  32  -2   -0.05    0.10
 -24 -32   2    0.10    0.12
  24  32   2    0.15    0.12
 -26  32   2    0.49    0.16
  26  32  -2    0.41    0.15
  26 -32   2    0.57    0.17
 -26 -32  -2    0.77    0.19
 -26  32  -2    0.71    0.17
  26  32   2    0.79    0.19
  26 -32  -2    0.44    0.15
 -26 -32   2    0.62    0.18
  28  32  -2    0.20    0.14
 -28 -32   2   -0.14    0.12
   0  34  -2    0.48    0.14
   0  34   2    0.55    0.15
   0 -34  -2    0.76    0.15
   0 -34   2    0.67    0.15
  -2 -34  -2   16.27    0.59
   2  34  -2   17.79    0.64
   2 -34   2   16.74    0.61
  -2  34   2   16.45    0.61
   2  34   2   15.99    0.61
   2 -34  -2   17.48    0.61
  -2 -34   2   17.29    0.61
  -2  34  -2   16.22    0.61
  -4  34   2    1.23    0.18
  -4 -34  -2    1.42    0.19
   4 -34   2    1.56    0.20
   4  34  -2    1.48    0.21
   4 -34  -2    1.46    0.19
  -4  34  -2    1.38    0.20
   4  34   2    1.43    0.20
  -4 -34   2    1.49    0.19
  -6 -34  -2   17.75    0.63
  -6  34   2   17.36    0.63
   6 -34   2   19.40    0.67
   6  34  -2   18.22    0.68
  -6 -34   2   19.27    0.66
   6 -34  -2   18.04    0.64
  -6  34  -2   18.73    0.66
   6  34   2   19.57    0.69
   8 -34   2    1.73    0.22
   8  34  -2    1.39    0.21
  -8  34   2    1.39    0.19
  -8 -34  -2    1.38    0.19
   8 -34  -2    1.84    0.22
  -8 -34   2    1.78    0.21
  -8  34  -2    1.81    0.21
   8  34   2    1.55    0.22
 -10 -34  -2   10.14    0.44
 -10 -34  -2    9.70    0.44
  10 -34   2   10.23    0.47
 -10  34   2   10.94    0.45
  10  34  -2   10.10    0.48
 -10  34  -2   10.34    0.43
  10 -34  -2   10.33    0.46
 -10 -34   2   10.51    0.46
  10  34   2    9.94    0.48
 -10  34  -2   10.45    0.45
  12  34  -2    1.21    0.21
 -12  34   2    1.31    0.19
 -12 -34  -2    1.08    0.17
  12 -34   2    0.89    0.17
 -12 -34  -2    1.06    0.18
 -12 -34   2    1.18    0.18
  12 -34  -2    1.26    0.20
 -12  34  -2    1.09    0.17
  12  34   2    1.26    0.21
 -14 -34  -2   15.58    0.62
 -14  34   2   16.78    0.62
  14  34  -2   17.22    0.67
  14 -34   2   17.18    0.64
 -14 -34  -2   17.16    0.62
 -14 -34   2   16.04    0.61
  14 -34  -2   17.07    0.64
 -14 -34   2   16.38    0.62
  14  34   2   16.46    0.66
 -14  34  -2   16.80    0.61
  16  34  -2    0.36    0.15
 -16  34   2    0.35    0.13
 -16 -34  -2    0.44    0.14
  16 -34   2    0.32    0.13
  16 -34  -2    0.45    0.14
  16  34   2    0.25    0.13
 -16  34  -2    0.44    0.13
 -16 -34   2    0.37    0.13
 -16 -34   2    0.40    0.14
  18 -34   2   16.36    0.65
 -18 -34  -2   16.33    0.65
  18  34  -2   16.87    0.67
 -18  34   2   16.85    0.64
 -18  34  -2   15.90    0.62
  18 -34  -2   16.16    0.64
  18  34   2   15.47    0.65
 -18 -34   2   17.26    0.63
 -18 -34   2   15.57    0.64
 -20  34   2    0.46    0.15
  20  34  -2    0.15    0.13
  20 -34   2    0.09    0.11
 -20 -34  -2    0.49    0.15
 -20  34  -2    0.48    0.14
 -20 -34   2    0.24    0.13
  20  34   2    0.48    0.16
  20 -34  -2    0.29    0.13
 -20 -34   2    0.41    0.15
 -22  34   2    4.67    0.34
  22  34  -2    5.16    0.37
 -22 -34  -2    5.12    0.37
  22 -34   2    5.23    0.36
  22  34   2    4.69    0.36
 -22 -34   2    4.40    0.35
 -22  34  -2    4.52    0.33
  22 -34  -2    4.52    0.33
 -24  34   2    0.37    0.14
  24 -34   2    0.39    0.15
 -24 -34  -2    0.43    0.15
  24  34  -2    0.43    0.15
  24 -34  -2    0.33    0.15
 -24  34  -2    0.53    0.16
 -24 -34   2    0.35    0.14
  24  34   2    0.38    0.15
 -26 -34   2    6.47    0.43
   0  36   2    0.09    0.11
   0  36  -2    0.07    0.11
   0 -36  -2   -0.02    0.08
   0 -36   2    0.05    0.10
  -2  36   2   -0.04    0.09
   2  36  -2   -0.02    0.10
  -2 -36  -2    0.01    0.10
   2 -36   2   -0.07    0.08
   2 -36  -2    0.05    0.08
   2  36   2    0.11    0.11
  -2  36  -2    0.24    0.11
  -2 -36   2    0.24    0.11
  -4  36   2    0.20    0.12
  -4 -36  -2   -0.08    0.09
   4 -36   2   -0.02    0.09
   4  36  -2    0.01    0.10
   4  36   2   -0.02    0.10
  -4  36  -2    0.12    0.11
   4 -36  -2    0.07    0.09
  -4 -36   2   -0.07    0.08
   6 -36   2   -0.04    0.09
  -6 -36  -2   -0.14    0.07
   6  36  -2    0.10    0.11
  -6  36   2    0.11    0.10
  -6 -36   2    0.11    0.10
   6 -36  -2    0.10    0.10
  -6  36  -2    0.02    0.09
   6  36   2   -0.05    0.10
  -8 -36  -2    0.03    0.09
   8  36  -2    0.22    0.12
   8 -36   2    0.04    0.10
  -8 -36   2    0.26    0.12
  -8  36  -2    0.19    0.11
   8 -36  -2   -0.01    0.10
   8  36   2    0.02    0.11
  10  36  -2    0.04    0.12
 -10 -36  -2    0.02    0.10
  10 -36   2    0.09    0.10
 -10 -36   2    0.17    0.10
  10 -36  -2    0.09    0.10
  10  36   2    0.11    0.11
  12 -36   2    0.14    0.11
  12  36  -2    0.01    0.11
 -12  36   2    0.05    0.10
  12 -36  -2    0.12    0.11
 -12 -36   2    0.07    0.11
  12  36   2    0.02    0.11
 -14  36   2    0.56    0.15
  14  36  -2    0.38    0.16
 -14 -36  -2    0.63    0.15
  14 -36   2    0.63    0.16
  14  36   2    0.48    0.16
 -14  36  -2    0.44    0.14
  14 -36  -2    0.58    0.15
 -14 -36   2   -0.05    0.10
  16  36  -2    0.46    0.17
  16 -36   2    0.50    0.16
 -16  36   2    0.47    0.15
 -16 -36  -2    0.72    0.17
 -16 -36   2    0.49    0.15
  16 -36  -2    0.25    0.14
  16  36   2    0.32    0.15
 -16  36  -2    0.87    0.19
 -18 -36  -2    0.18    0.12
  18 -36   2    0.05    0.11
  18  36  -2    0.12    0.12
 -18  36   2   -0.03    0.10
 -18  36  -2    0.08    0.12
  18 -36  -2   -0.12    0.09
 -18 -36   2    0.14    0.12
 -18 -36   2   -0.06    0.10
  18  36   2   -0.12    0.10
  20  36  -2    0.35    0.15
 -20  36   2    0.28    0.14
 -20 -36  -2    0.43    0.15
  20 -36   2    0.28    0.15
 -20 -36   2    0.38    0.16
 -20  36  -2    0.10    0.12
  20 -36  -2    0.27    0.14
  20  36   2    0.35    0.16
 -22  36   2    0.08    0.13
 -22 -36  -2    0.45    0.16
  22 -36  -2    0.21    0.14
 -22 -36   2    0.12    0.12
 -22  36  -2    0.25    0.13
   0 -38   2    0.58    0.15
   0  38   2    0.48    0.15
   0 -38  -2    0.61    0.15
   0  38  -2    0.33    0.14
  -2 -38  -2   20.58    0.73
   2 -38   2   21.88    0.76
   2  38  -2   21.05    0.76
  -2  38   2   20.68    0.74
   2 -38  -2   21.92    0.74
  -2 -38   2   21.39    0.74
   2  38   2   21.46    0.76
  -2  38  -2   21.52    0.76
   4  38  -2    0.38    0.15
   4 -38   2    0.13    0.11
  -4 -38  -2    0.16    0.11
  -4  38   2    0.23    0.12
  -4  38  -2    0.21    0.13
   4  38   2   -0.03    0.11
   4 -38  -2    0.27    0.13
  -4 -38   2    0.24    0.12
   6  38  -2   18.03    0.69
  -6 -38  -2   18.05    0.65
   6 -38   2   17.81    0.67
  -6  38   2   16.87    0.66
  -6 -38   2   19.46    0.68
   6 -38  -2   17.37    0.66
   6  38   2   17.49    0.68
  -6  38  -2   17.33    0.66
  -8 -38  -2    0.60    0.15
   8  38  -2    0.30    0.14
   8 -38   2    0.52    0.15
  -8 -38   2    0.39    0.14
   8  38   2    0.33    0.14
  -8  38  -2    0.40    0.14
   8 -38  -2    0.49    0.15
  10  38  -2   18.26    0.72
  10 -38   2   17.08    0.67
  10  38   2   18.51    0.72
  10 -38  -2   17.85    0.68
 -10 -38   2   17.32    0.66
  12  38  -2    1.09    0.21
  12 -38   2    0.63    0.17
  12 -38  -2    0.58    0.16
 -12 -38   2    0.58    0.16
  12  38   2    0.44    0.16
  14  38  -2   13.93    0.62
  14 -38   2   13.54    0.59
  14 -38  -2   13.46    0.59
 -14 -38   2   13.00    0.56
  14  38   2   14.62    0.62
  16 -38   2    0.23    0.14
 -16  38   2    0.15    0.12
  16  38  -2    0.21    0.13
 -16  38  -2    0.34    0.14
  16 -38  -2    0.36    0.14
  16  38   2    0.32    0.15
 -18 -38  -2    3.90    0.32
 -18  38   2    3.86    0.32
  18 -38   2    3.78    0.33
  18 -38  -2    3.06    0.32
 -18  38  -2    3.69    0.31
   0  40   2    0.15    0.13
   0 -40  -2    0.04    0.11
   0 -40   2    0.00    0.10
   0  40  -2    0.02    0.11
  -2  40   2   -0.06    0.10
   2  40  -2    0.20    0.14
   2 -40   2    0.07    0.11
  -2 -40  -2    0.20    0.12
   2 -40  -2    0.22    0.11
  -2  40  -2    0.15    0.13
   2  40   2    0.03    0.12
  -2 -40   2    0.15    0.13
   4  40  -2    0.03    0.11
  -4 -40  -2   -0.01    0.11
  -4  40   2   -0.01    0.11
   4 -40   2    0.07    0.12
  -4  40  -2    0.07    0.11
   4 -40  -2    0.08    0.12
  -4 -40   2   -0.08    0.11
   4  40   2    0.08    0.12
   6 -40   2    0.29    0.14
   6  40  -2    0.25    0.14
  -6 -40  -2    0.29    0.14
   6  40   2    0.39    0.15
   6 -40  -2    0.42    0.15
  -6  40  -2    0.45    0.15
  -6 -40   2    0.22    0.13
   8  40  -2   -0.12    0.11
   8 -40   2   -0.04    0.10
   8 -40  -2   -0.08    0.10
  -8 -40   2    0.07    0.12
   8  40   2    0.20    0.14
  10  40  -2    0.14    0.14
  10 -40   2    0.25    0.13
 -10 -40   2    0.12    0.12
  10  40   2    0.15    0.13
  10 -40  -2    0.16    0.13
  12  40  -2    0.24    0.15
  12 -40   2    0.06    0.13
  12 -40  -2    0.13    0.13
  12  40   2    0.13    0.13
 -12 -40   2   -0.02    0.10
  14 -40  -2    0.15    0.13
   0 -42  -2    0.51    0.16
   0 -42   2    0.64    0.17
   0  42  -2    0.48    0.16
   0  42   2    0.68    0.18
   2 -42   2    7.31    0.44
   2  42  -2    8.04    0.45
  -2  42   2    7.19    0.43
  -2 -42  -2    7.60    0.42
   2  42   2    8.20    0.45
  -2 -42   2    7.81    0.44
   2 -42  -2    8.30    0.45
  -2  42  -2    7.98    0.45
   4  42  -2    0.92    0.21
   4 -42   2    1.14    0.21
  -4  42  -2    1.11    0.20
   4  42   2    0.70    0.19
  -4 -42   2    0.57    0.17
   4 -42  -2    0.84    0.18
   6 -42   2    5.83    0.39
   6  42  -2    5.73    0.45
   6  42   2    5.22    0.38
   6 -42  -2    5.34    0.37
  -6 -42   2    5.55    0.37
   8 -42  -2    0.12    0.13
  -8 -42   2    0.18    0.12
   1  -1   3   -0.22    0.02
  -1   1   3   -0.26    0.02
   1   1   3   -0.18    0.02
   1  -1  -3   -0.17    0.02
  -1   1  -3   -0.21    0.02
   3  -1   3    0.17    0.02
   3  -1   3    0.17    0.02
   3   1  -3    0.10    0.02
   3  -1   3    0.16    0.02
  -3  -1  -3    0.14    0.02
  -3   1   3    0.15    0.02
   3  -1  -3    0.10    0.02
   3   1   3    0.12    0.02
  -3  -1   3    0.15    0.03
   3   1   3    0.14    0.02
   3  -1  -3    0.14    0.02
   5   1  -3    0.08    0.02
  -5   1   3    0.07    0.02
   5  -1   3    0.09    0.03
   5  -1   3    0.06    0.02
   5   1  -3    0.06    0.02
   5   1  -3    0.07    0.03
   5  -1   3    0.04    0.02
   5  -1   3    0.07    0.02
   5   1   3    0.10    0.02
  -5  -1   3    0.06    0.02
   5   1   3    0.05    0.02
   5  -1  -3    0.09    0.03
   5  -1  -3    0.08    0.03
   5   1   3    0.10    0.02
   5   1   3    0.07    0.02
   7  -1   3    0.14    0.03
   7  -1   3    0.13    0.03
   7  -1   3    0.11    0.03
  -7   1   3    0.13    0.03
   7  -1   3    0.12    0.03
   7   1  -3    0.12    0.03
   7   1  -3    0.12    0.03
   7   1  -3    0.09    0.02
   7  -1  -3    0.12    0.03
   7   1   3    0.13    0.03
  -7  -1   3    0.11    0.02
   7  -1  -3    0.13    0.03
   7   1   3    0.09    0.03
   7   1   3    0.12    0.03
   7   1   3    0.13    0.03
   9   1  -3    3.25    0.13
  -9   1   3    3.23    0.11
   9   1  -3    3.24    0.13
   9  -1   3    3.47    0.12
   9  -1   3    3.37    0.12
   9  -1   3    3.13    0.11
   9  -1   3    3.36    0.12
   9   1  -3    3.07    0.10
   9   1   3    3.20    0.11
   9  -1  -3    3.11    0.10
   9  -1  -3    3.19    0.13
   9   1   3    3.25    0.12
   9   1   3    3.13    0.12
   9  -1  -3    3.15    0.13
  -9  -1   3    3.29    0.11
   9   1   3    3.30    0.12
  11  -1   3    0.43    0.05
  11   1  -3    0.35    0.04
  11  -1   3    0.42    0.05
  11  -1   3    0.42    0.05
  11   1  -3    0.44    0.06
  11   1  -3    0.38    0.06
 -11   1   3    0.35    0.05
  11  -1   3    0.43    0.05
  11  -1  -3    0.44    0.04
  11   1   3    0.38    0.05
 -11  -1   3    0.43    0.05
  11   1   3    0.41    0.05
  11   1   3    0.39    0.05
  11  -1  -3    0.32    0.05
  11   1   3    0.38    0.05
  11  -1  -3    0.40    0.06
  13  -1   3   10.30    0.29
  13   1  -3   10.20    0.32
 -13   1   3   10.26    0.28
  13   1  -3   10.77    0.28
  13  -1   3   10.61    0.30
  13  -1   3    9.90    0.29
  13  -1   3   10.65    0.30
  13   1  -3   10.46    0.31
  13   1   3    9.73    0.30
  13   1   3   10.27    0.29
  13  -1  -3   10.32    0.31
  13  -1  -3   10.14    0.31
 -13  -1   3   10.85    0.28
  13  -1  -3   10.45    0.27
  13   1   3   10.71    0.28
  13   1   3   10.40    0.30
 -15   1   3    0.42    0.06
  15  -1   3    0.31    0.05
  15  -1   3    0.54    0.06
  15   1  -3    0.33    0.06
  15  -1   3    0.55    0.06
  15   1  -3    0.48    0.05
  15  -1   3    0.47    0.06
  15   1  -3    0.34    0.06
  15   1   3    0.52    0.07
  15  -1  -3    0.50    0.07
 -15  -1   3    0.49    0.06
  15   1   3    0.55    0.07
  15   1   3    0.51    0.07
  15  -1  -3    0.45    0.05
  15  -1  -3    0.54    0.07
  15   1   3    0.39    0.05
  17  -1   3    9.64    0.31
  17  -1   3   10.14    0.30
 -17   1   3    9.82    0.29
  17   1  -3   10.41    0.29
  17  -1   3    9.69    0.31
  17   1  -3    9.64    0.33
  17   1  -3    9.55    0.32
  17  -1   3    9.79    0.29
  17   1   3    9.39    0.31
  17   1   3    9.51    0.28
  17  -1  -3   10.02    0.28
  17  -1  -3    9.79    0.32
  17   1   3    9.85    0.31
  17  -1  -3    9.09    0.32
 -17  -1   3    9.56    0.28
  17   1   3   10.30    0.31
  19  -1   3    0.35    0.06
  19   1  -3    0.18    0.06
  19   1  -3    0.30    0.05
  19  -1   3    0.15    0.05
  19   1  -3    0.34    0.07
 -19   1   3    0.38    0.06
  19  -1   3    0.33    0.07
  19  -1   3    0.32    0.06
  19   1   3    0.23    0.06
  19   1   3    0.23    0.06
  19   1   3    0.29    0.05
  19  -1  -3    0.33    0.07
  19  -1  -3    0.32    0.07
  19  -1  -3    0.22    0.04
 -19  -1   3    0.35    0.06
  19   1   3    0.23    0.06
  21  -1   3    0.06    0.05
  21   1  -3    0.20    0.07
  21  -1   3    0.09    0.05
  21  -1   3    0.17    0.06
  21   1  -3    0.20    0.05
  21   1  -3    0.16    0.06
  21  -1   3    0.09    0.04
 -21   1   3    0.22    0.06
 -21  -1   3    0.15    0.05
  21   1   3    0.14    0.05
  21   1   3    0.13    0.05
  21   1   3    0.15    0.05
  21  -1  -3    0.12    0.06
  21   1   3    0.12    0.06
  21  -1  -3    0.09    0.04
  21  -1  -3    0.15    0.06
  23  -1   3    0.32    0.08
 -23   1   3    0.39    0.07
  23  -1   3    0.29    0.07
  23  -1   3    0.37    0.08
  23   1  -3    0.32    0.08
  23  -1   3    0.26    0.06
  23   1  -3    0.22    0.06
  23   1  -3    0.30    0.08
  23  -1  -3    0.41    0.09
  23   1   3    0.36    0.08
 -23  -1   3    0.30    0.06
  23   1   3    0.27    0.07
  23  -1  -3    0.27    0.06
  23   1   3    0.33    0.07
  23  -1  -3    0.28    0.08
  23   1   3    0.44    0.09
  25   1  -3    3.87    0.23
  25  -1   3    3.64    0.21
  25  -1   3    3.76    0.19
  25   1  -3    3.81    0.22
  25  -1   3    3.84    0.21
 -25   1   3    3.91    0.19
  25  -1   3    3.95    0.20
  25   1   3    3.73    0.19
  25   1   3    3.54    0.20
  25  -1  -3    4.08    0.23
  25   1   3    3.96    0.22
  25   1   3    3.98    0.20
 -25  -1   3    3.85    0.19
  25  -1  -3    3.62    0.22
 -27   1   3    0.04    0.06
  27  -1   3    0.07    0.06
  27   1  -3    0.00    0.07
  27  -1   3    0.05    0.06
  27   1  -3    0.07    0.07
 -27  -1  -3    0.08    0.06
  27  -1   3    0.11    0.06
  27   1   3    0.07    0.07
  27   1   3    0.10    0.06
 -27   1  -3    0.11    0.06
  27  -1  -3    0.05    0.07
 -27  -1   3    0.07    0.06
  27   1   3    0.12    0.06
  27   1   3    0.04    0.06
  27  -1  -3    0.21    0.08
  29  -1   3    0.77    0.12
  29   1  -3    0.68    0.13
 -29   1   3    0.74    0.11
  29  -1   3    1.13    0.15
  29   1  -3    0.76    0.14
 -29  -1  -3    0.80    0.12
  29   1   3    0.61    0.11
  29   1   3    0.83    0.12
 -29   1  -3    0.99    0.13
  29  -1  -3    0.74    0.13
  29   1   3    0.96    0.14
 -29  -1   3    0.69    0.10
  29  -1  -3    0.53    0.12
 -31   1   3    0.83    0.12
  31  -1   3    0.62    0.12
  31  -1   3    0.83    0.13
  31   1  -3    0.66    0.13
  31   1  -3    0.88    0.15
  31  -1  -3    0.90    0.14
 -31   1  -3    0.92    0.13
  31  -1  -3    0.97    0.16
  31   1   3    0.94    0.15
  31   1   3    0.33    0.10
  33   1  -3    4.95    0.30
  33  -1   3    4.79    0.28
  33   1  -3    4.59    0.29
  33  -1   3    4.86    0.28
  33  -1  -3    4.45    0.29
  33  -1  -3    4.20    0.28
 -33   1  -3    4.55    0.27
  33   1   3    4.88    0.28
  33   1   3    4.74    0.29
  35   1  -3    0.31    0.12
  35  -1   3    0.48    0.13
  35  -1   3    0.44    0.12
 -35  -1   3    0.45    0.13
  35   1   3    0.24    0.11
  35  -1  -3    0.52    0.13
  35  -1  -3    0.44    0.12
  35   1   3    0.31    0.11
  37   1  -3    1.86    0.23
 -37  -1  -3    1.77    0.22
  37  -1   3    1.77    0.22
  37   1   3    1.74    0.22
 -37  -1   3    1.74    0.23
  37  -1  -3    2.09    0.24
  37  -1  -3    1.96    0.24
  39  -1   3    0.24    0.11
  39   1  -3    0.05    0.11
 -39   1   3    0.13    0.12
 -39  -1  -3    0.11    0.12
  39  -1  -3    0.27    0.12
 -39  -1   3    0.17    0.13
 -41  -1  -3   -0.17    0.11
 -41   1   3    0.15    0.14
  41   1  -3    0.14    0.12
 -41   1  -3    0.05    0.12
 -41  -1   3   -0.06    0.12
  -1  -3  -3    0.04    0.02
   1   3  -3    0.01    0.02
   1   3  -3    0.02    0.01
   1  -3   3    0.05    0.02
  -1   3   3    0.03    0.02
   1  -3   3    0.06    0.02
  -1  -3   3    0.02    0.02
  -1   3  -3    0.02    0.02
   1   3   3    0.03    0.01
   1  -3  -3    0.04    0.02
   1   3   3    0.04    0.02
   1  -3  -3    0.03    0.01
   3   3  -3    0.21    0.03
  -3  -3  -3    0.20    0.03
  -3   3   3    0.26    0.03
   3  -3   3    0.23    0.03
   3   3  -3    0.23    0.03
   3  -3   3    0.27    0.03
   3   3   3    0.23    0.02
  -3   3  -3    0.26    0.03
   3  -3  -3    0.26    0.03
   3  -3  -3    0.27    0.03
   3   3   3    0.22    0.03
  -3  -3   3    0.26    0.03
   5   3  -3    0.01    0.03
  -5  -3  -3    0.02    0.02
   5  -3   3   -0.01    0.02
   5  -3   3    0.04    0.03
   5   3  -3    0.04    0.03
  -5   3   3    0.04    0.03
   5   3   3   -0.01    0.02
  -5  -3   3    0.00    0.03
   5  -3  -3    0.07    0.03
   5   3   3    0.03    0.02
   5  -3  -3    0.02    0.03
   5   3   3    0.04    0.03
  -5   3  -3   -0.01    0.02
   7   3  -3    0.65    0.06
   7   3  -3    0.63    0.05
   7  -3   3    0.64    0.05
   7  -3   3    0.59    0.05
   7  -3   3    0.61    0.05
  -7   3   3    0.65    0.05
   7  -3   3    0.60    0.04
  -7   3  -3    0.53    0.05
   7   3   3    0.65    0.06
   7  -3  -3    0.61    0.05
   7   3   3    0.56    0.04
  -7  -3   3    0.61    0.04
  -7  -3   3    0.67    0.06
   7   3   3    0.73    0.05
   7   3   3    0.78    0.06
   7  -3  -3    0.65    0.06
   9  -3   3    1.55    0.08
   9   3  -3    1.54    0.09
  -9   3   3    1.65    0.08
   9   3  -3    1.73    0.08
   9  -3   3    1.55    0.08
   9  -3   3    1.53    0.07
   9  -3   3    1.60    0.08
   9  -3  -3    1.60    0.06
   9  -3  -3    1.54    0.09
   9   3   3    1.64    0.08
   9  -3  -3    1.46    0.08
  -9  -3   3    1.62    0.06
   9   3   3    1.53    0.08
  -9  -3   3    1.61    0.09
   9   3   3    1.66    0.07
   9   3   3    1.44    0.08
  11   3  -3    0.43    0.06
  11  -3   3    0.58    0.06
 -11   3   3    0.37    0.05
  11   3  -3    0.55    0.05
  11  -3   3    0.51    0.05
  11  -3   3    0.48    0.05
  11  -3   3    0.37    0.05
  11   3  -3    0.44    0.06
  11   3   3    0.54    0.06
  11  -3  -3    0.47    0.06
  11   3   3    0.60    0.05
  11  -3  -3    0.50    0.04
  11   3   3    0.44    0.05
  11   3   3    0.42    0.05
  11  -3  -3    0.34    0.05
 -11  -3   3    0.45    0.04
  13   3  -3    3.75    0.14
  13   3  -3    4.04    0.17
  13  -3   3    3.57    0.14
  13   3  -3    3.42    0.16
 -13   3   3    3.53    0.14
  13  -3   3    3.84    0.15
  13  -3   3    3.62    0.15
  13  -3   3    3.69    0.14
  13   3   3    3.68    0.15
  13  -3  -3    3.60    0.16
  13   3   3    3.74    0.13
  13  -3  -3    3.77    0.12
  13   3   3    3.74    0.15
  13   3   3    3.62    0.16
 -13  -3   3    3.79    0.13
  13  -3  -3    3.73    0.16
  15  -3   3    0.71    0.07
 -15   3   3    0.85    0.07
  15  -3   3    1.00    0.08
  15  -3   3    0.73    0.08
  15  -3   3    0.84    0.07
  15   3  -3    0.89    0.07
  15   3  -3    0.72    0.08
  15   3  -3    1.09    0.11
  15   3   3    0.84    0.09
  15  -3  -3    0.85    0.06
 -15  -3   3    0.77    0.06
  15  -3  -3    0.89    0.10
  15  -3  -3    0.65    0.08
  15   3   3    0.72    0.08
  15   3   3    0.85    0.08
  15   3   3    0.78    0.06
  17   3  -3    6.15    0.21
  17  -3   3    6.05    0.22
  17   3  -3    6.05    0.24
  17  -3   3    6.08    0.21
  17   3  -3    6.25    0.25
  17  -3   3    6.42    0.23
 -17   3   3    5.71    0.21
  17  -3   3    6.18    0.22
 -17  -3   3    6.06    0.19
  17  -3  -3    6.08    0.24
  17   3   3    5.95    0.23
  17  -3  -3    5.85    0.23
  17  -3  -3    5.92    0.19
  17   3   3    6.28    0.23
  17   3   3    6.23    0.22
  17   3   3    6.41    0.20
  19   3  -3    0.34    0.07
  19  -3   3    0.47    0.08
  19   3  -3    0.37    0.08
  19  -3   3    0.52    0.07
  19   3  -3    0.39    0.06
 -19   3   3    0.38    0.07
  19  -3   3    0.50    0.07
  19  -3   3    0.33    0.06
  19   3   3    0.39    0.07
 -19  -3   3    0.33    0.05
  19  -3  -3    0.23    0.07
  19   3   3    0.43    0.08
  19  -3  -3    0.26    0.06
  19  -3  -3    0.31    0.05
  19   3   3    0.35    0.05
  19   3   3    0.42    0.07
  21  -3   3    0.66    0.09
  21  -3   3    0.55    0.09
  21  -3   3    0.47    0.07
 -21   3   3    0.66    0.09
  21   3  -3    0.75    0.11
  21   3  -3    0.52    0.09
  21  -3   3    0.52    0.08
  21   3  -3    0.68    0.08
 -21  -3   3    0.61    0.07
  21  -3  -3    0.62    0.09
  21   3   3    0.71    0.09
  21   3   3    0.66    0.09
  21   3   3    0.75    0.11
  21   3   3    0.54    0.07
  21  -3  -3    0.56    0.09
  21  -3  -3    0.63    0.07
  23  -3   3    0.07    0.05
  23   3  -3    0.09    0.06
  23   3  -3    0.05    0.05
 -23   3   3    0.15    0.06
  23   3  -3   -0.01    0.06
  23  -3   3    0.04    0.06
  23  -3   3    0.10    0.05
  23  -3   3    0.12    0.06
  23   3   3    0.15    0.06
  23   3   3    0.05    0.06
 -23  -3   3    0.02    0.05
  23  -3  -3    0.13    0.06
  23  -3  -3    0.04    0.05
  23   3   3    0.04    0.04
  23   3   3    0.10    0.06
  25  -3   3    7.90    0.30
  25   3  -3    7.75    0.34
  25  -3   3    8.13    0.32
  25   3  -3    7.92    0.28
  25   3  -3    8.18    0.33
  25  -3   3    7.24    0.30
 -25   3   3    8.16    0.30
  25  -3   3    8.03    0.29
  25  -3  -3    7.88    0.33
  25   3   3    8.42    0.31
 -25  -3   3    7.48    0.27
  25  -3  -3    7.94    0.33
  25   3   3    8.40    0.32
  25   3   3    7.45    0.32
  25   3   3    7.70    0.27
  27   3  -3    0.78    0.13
  27  -3   3    0.92    0.13
 -27   3   3    0.82    0.11
  27   3  -3    1.11    0.15
  27  -3   3    0.99    0.14
  27  -3   3    0.83    0.11
  27  -3  -3    0.98    0.14
  27   3   3    1.03    0.15
 -27   3  -3    0.61    0.11
  27   3   3    0.82    0.12
  27  -3  -3    0.91    0.13
  27   3   3    0.85    0.12
  27   3   3    1.03    0.11
  29   3  -3    1.49    0.19
 -29   3   3    2.17    0.17
  29  -3   3    1.96    0.17
  29  -3   3    2.08    0.18
  29   3   3    2.11    0.17
  29  -3  -3    1.53    0.18
 -29  -3   3    1.85    0.19
 -29   3  -3    2.05    0.17
  29  -3  -3    1.91    0.19
  29   3   3    1.59    0.18
  29   3   3    1.71    0.15
  31   3  -3    0.90    0.15
  31  -3   3    1.10    0.15
 -31   3   3    0.82    0.12
 -31  -3  -3    0.68    0.14
  31  -3   3    0.73    0.13
 -31   3  -3    0.87    0.13
  31  -3  -3    0.70    0.13
  31   3   3    0.91    0.14
 -31  -3   3    0.65    0.14
  31  -3  -3    0.80    0.14
 -33   3   3    2.21    0.19
  33   3  -3    2.13    0.24
  33  -3   3    2.37    0.21
 -33  -3  -3    2.11    0.22
  33  -3   3    2.49    0.21
  33  -3  -3    2.01    0.22
 -33   3  -3    2.32    0.19
  33  -3  -3    2.36    0.24
 -33  -3   3    1.85    0.21
  33   3   3    2.35    0.21
  35  -3   3    0.29    0.11
  35   3  -3    0.39    0.12
 -35  -3  -3    0.36    0.12
  35   3   3    0.23    0.11
 -35   3  -3    0.09    0.10
 -35  -3   3    0.33    0.12
  35  -3  -3    0.29    0.12
  35  -3  -3    0.32    0.11
  37   3  -3    1.96    0.25
 -37  -3  -3    2.05    0.24
  37  -3   3    1.87    0.22
  37   3   3    1.96    0.24
  37  -3  -3    2.02    0.24
 -37  -3   3    2.11    0.25
  37  -3  -3    1.97    0.24
  39  -3   3    0.28    0.13
 -39  -3  -3    0.19    0.13
  39   3  -3    0.15    0.12
  39   3   3    0.34    0.14
 -39  -3   3    0.24    0.13
  39  -3  -3    0.15    0.11
  41   3  -3    1.16    0.21
  41  -3   3    1.35    0.21
 -41   3   3    0.96    0.21
 -41  -3   3    1.26    0.22
  -1  -5  -3    0.08    0.03
   1   5  -3    0.05    0.02
   1   5  -3    0.04    0.02
   1  -5   3    0.06    0.02
  -1   5   3    0.06    0.02
  -1   5   3    0.05    0.03
   1  -5   3    0.05    0.02
  -1  -5  -3    0.05    0.02
   1   5   3    0.06    0.02
   1  -5  -3    0.03    0.02
  -1   5  -3    0.08    0.03
  -1  -5   3    0.04    0.02
   1  -5  -3    0.04    0.02
  -1  -5   3    0.04    0.02
   1   5   3    0.00    0.02
   3   5  -3   -0.01    0.03
  -3   5   3   -0.01    0.03
  -3   5   3    0.03    0.02
   3  -5   3    0.01    0.02
   3   5  -3   -0.01    0.02
  -3  -5  -3    0.01    0.02
  -3  -5  -3    0.02    0.03
   3  -5   3    0.07    0.03
   3   5   3   -0.01    0.02
   3   5   3    0.01    0.02
  -3  -5   3    0.01    0.03
   3  -5  -3    0.03    0.03
  -3   5  -3    0.00    0.02
   3  -5  -3    0.02    0.03
  -5  -5  -3    0.39    0.04
   5  -5   3    0.40    0.04
  -5   5   3    0.48    0.05
   5   5  -3    0.45    0.05
   5  -5   3    0.44    0.05
   5   5  -3    0.50    0.05
  -5   5   3    0.38    0.03
   5   5   3    0.39    0.03
   5   5   3    0.32    0.04
   5   5   3    0.40    0.05
   5  -5  -3    0.41    0.04
  -5  -5   3    0.38    0.05
  -5   5  -3    0.45    0.05
   5  -5  -3    0.40    0.05
   7   5  -3    3.60    0.13
  -7  -5  -3    3.66    0.12
   7  -5   3    3.51    0.13
   7  -5   3    3.43    0.10
  -7   5   3    3.46    0.13
  -7   5   3    3.49    0.10
   7   5  -3    3.15    0.13
   7  -5  -3    3.49    0.13
  -7   5  -3    3.39    0.12
   7   5   3    3.53    0.13
  -7  -5   3    3.51    0.13
   7  -5  -3    3.40    0.12
   7   5   3    3.47    0.10
   7   5   3    3.44    0.13
   9   5  -3    0.49    0.06
   9   5  -3    0.35    0.05
   9  -5   3    0.49    0.06
   9  -5   3    0.47    0.04
  -9  -5  -3    0.50    0.05
  -9   5   3    0.48    0.04
  -9   5   3    0.52    0.06
   9  -5   3    0.52    0.06
   9  -5  -3    0.53    0.06
   9   5   3    0.62    0.07
   9   5   3    0.52    0.04
  -9   5  -3    0.57    0.05
  -9  -5   3    0.47    0.03
  -9  -5   3    0.50    0.06
   9  -5  -3    0.54    0.06
   9   5   3    0.40    0.05
  11  -5   3    4.19    0.16
 -11  -5  -3    4.07    0.15
  11   5  -3    4.30    0.15
 -11   5   3    4.05    0.15
 -11   5   3    4.06    0.12
  11  -5   3    4.25    0.14
  11  -5   3    3.93    0.16
  11   5  -3    3.97    0.17
  11   5   3    3.99    0.16
  11  -5  -3    3.75    0.16
  11   5   3    4.09    0.13
 -11  -5   3    3.86    0.16
  11  -5  -3    3.95    0.15
 -11  -5   3    4.07    0.12
 -11   5  -3    4.09    0.15
  11   5   3    4.22    0.17
 -13   5   3    0.60    0.05
  13   5  -3    0.69    0.08
  13  -5   3    0.77    0.06
 -13   5   3    0.77    0.08
  13  -5   3    0.77    0.08
  13  -5   3    0.62    0.07
 -13  -5  -3    0.75    0.07
  13   5  -3    0.71    0.07
  13   5   3    0.73    0.05
 -13   5  -3    0.71    0.07
  13   5   3    0.65    0.07
  13  -5  -3    0.66    0.07
 -13  -5   3    0.74    0.08
 -13  -5   3    0.73    0.05
  13   5   3    0.63    0.07
  13  -5  -3    0.55    0.08
  15  -5   3    4.78    0.19
  15  -5   3    4.65    0.19
 -15   5   3    5.07    0.15
  15  -5   3    4.78    0.17
 -15   5   3    4.55    0.18
 -15  -5  -3    4.64    0.18
 -15   5  -3    4.83    0.18
  15  -5  -3    4.58    0.19
  15   5   3    4.53    0.19
  15   5   3    5.54    0.21
 -15  -5   3    4.56    0.15
  15   5   3    4.68    0.16
  15  -5  -3    4.53    0.20
 -17   5   3    3.08    0.12
  17   5  -3    3.26    0.18
 -17   5   3    3.40    0.16
 -17  -5  -3    3.12    0.15
  17  -5   3    3.26    0.16
  17  -5   3    3.27    0.16
  17   5  -3    3.68    0.15
  17  -5   3    2.91    0.14
 -17   5  -3    3.13    0.15
  17   5   3    3.16    0.17
 -17  -5   3    3.15    0.12
  17   5   3    3.12    0.13
 -17  -5   3    3.20    0.17
  17  -5  -3    3.53    0.17
  17   5   3    3.21    0.16
  17  -5  -3    3.22    0.17
 -19  -5  -3    1.07    0.11
  19   5  -3    1.01    0.09
 -19   5   3    0.95    0.10
  19  -5   3    0.97    0.10
  19  -5   3    0.97    0.11
 -19   5   3    0.84    0.07
  19   5  -3    0.94    0.12
  19  -5   3    0.83    0.10
  19   5   3    1.13    0.08
  19  -5  -3    0.85    0.10
  19   5   3    0.93    0.11
 -19  -5   3    0.84    0.07
 -19  -5   3    0.73    0.10
  19   5   3    1.04    0.10
 -19   5  -3    1.01    0.09
  19  -5  -3    0.76    0.11
  21   5  -3    1.46    0.11
 -21  -5  -3    1.27    0.13
  21  -5   3    1.56    0.13
 -21   5   3    1.49    0.12
  21   5  -3    1.01    0.13
  21  -5   3    1.33    0.12
 -21   5   3    1.25    0.09
  21  -5   3    1.41    0.12
 -21  -5   3    1.44    0.10
  21   5   3    1.55    0.10
  21   5   3    1.42    0.12
 -21  -5   3    1.54    0.14
  21  -5  -3    1.55    0.13
  21   5   3    1.29    0.14
 -21   5  -3    1.16    0.11
  21  -5  -3    1.53    0.13
  23  -5   3    0.58    0.09
 -23  -5  -3    0.52    0.09
 -23   5   3    0.49    0.08
  23  -5   3    0.47    0.09
  23  -5   3    0.63    0.09
  23   5  -3    0.52    0.10
  23   5  -3    0.43    0.08
 -23  -5   3    0.45    0.07
 -23   5  -3    0.56    0.09
 -23  -5   3    0.35    0.08
  23   5   3    0.52    0.07
  23  -5  -3    0.76    0.11
  23   5   3    0.67    0.10
  23   5   3    0.77    0.12
  23  -5  -3    0.51    0.10
  25   5  -3   11.32    0.37
  25   5  -3   11.31    0.43
 -25  -5  -3   11.28    0.40
  25  -5   3   11.45    0.41
  25  -5   3   11.17    0.39
 -25   5   3   11.91    0.39
  25  -5   3   11.49    0.39
 -25   5  -3   11.17    0.38
  25   5   3   11.28    0.39
  25  -5  -3   11.67    0.42
  25   5   3   11.25    0.42
  25   5   3   11.98    0.35
 -25  -5   3   12.01    0.42
  25  -5  -3   11.95    0.42
  27  -5   3    2.63    0.19
 -27  -5  -3    2.27    0.18
  27   5  -3    2.90    0.21
  27  -5   3    2.77    0.18
  27   5  -3    2.44    0.16
 -27   5   3    2.61    0.18
  27   5   3    2.30    0.17
  27  -5  -3    2.20    0.18
 -27   5  -3    2.48    0.18
 -27  -5   3    2.74    0.20
  27   5   3    2.51    0.20
  27  -5  -3    2.61    0.20
  29  -5   3    2.19    0.18
 -29  -5  -3    2.61    0.20
  29  -5   3    3.17    0.21
  29   5  -3    2.37    0.21
 -29   5   3    2.37    0.18
 -29  -5   3    2.30    0.20
  29   5   3    2.46    0.18
  29  -5  -3    2.34    0.20
  29  -5  -3    2.59    0.21
 -29   5  -3    2.55    0.19
  29   5   3    2.63    0.21
  31   5  -3    0.59    0.14
  31  -5   3    0.26    0.09
 -31   5   3    0.60    0.12
  31  -5   3    0.78    0.13
 -31  -5  -3    0.49    0.12
  31  -5  -3    0.42    0.11
  31  -5  -3    0.54    0.12
 -31  -5   3    0.61    0.14
 -31   5  -3    0.48    0.11
  31   5   3    0.69    0.14
 -33   5   3    0.56    0.12
  33   5  -3    0.55    0.14
  33  -5   3    0.50    0.13
 -33  -5  -3    0.67    0.14
  33   5   3    0.73    0.14
  33  -5  -3    0.46    0.12
  33  -5  -3    0.69    0.14
 -33  -5   3    0.41    0.13
 -33   5  -3    0.54    0.12
 -35  -5  -3    0.05    0.09
  35   5  -3   -0.11    0.08
 -35   5   3   -0.06    0.07
  35  -5   3   -0.04    0.07
 -35  -5   3    0.05    0.10
  35  -5  -3    0.08    0.09
  35   5   3   -0.03    0.07
 -35   5  -3    0.01    0.09
  35  -5  -3   -0.10    0.07
 -37  -5  -3    1.92    0.23
  37   5  -3    1.99    0.25
  37  -5   3    2.36    0.25
  37   5   3    1.91    0.24
 -37  -5   3    1.78    0.23
  37  -5  -3    1.89    0.23
 -39  -5  -3    0.37    0.14
  39  -5   3    0.18    0.11
  39   5  -3    0.07    0.11
  39  -5  -3    0.22    0.12
  39   5   3    0.21    0.12
 -39  -5   3    0.07    0.13
  41   5  -3    1.59    0.24
  41  -5   3    1.64    0.23
  41  -5  -3    1.47    0.22
 -41  -5   3    1.17    0.21
  41   5   3    1.56    0.24
   1   7  -3    0.10    0.04
   1  -7   3    0.08    0.03
  -1   7   3    0.14    0.03
  -1  -7  -3    0.07    0.02
  -1   7   3    0.12    0.03
  -1  -7  -3    0.07    0.03
   1   7  -3    0.13    0.03
   1  -7   3    0.10    0.03
   1   7   3    0.08    0.03
  -1   7  -3    0.12    0.02
  -1   7  -3    0.14    0.04
  -1  -7   3    0.09    0.03
   1  -7  -3    0.14    0.03
   1   7   3    0.12    0.03
   1  -7  -3    0.14    0.03
  -1  -7   3    0.13    0.02
  -3   7   3    0.27    0.04
  -3  -7  -3    0.26    0.04
  -3  -7  -3    0.20    0.03
   3  -7   3    0.24    0.04
  -3   7   3    0.23    0.04
   3  -7   3    0.23    0.03
   3   7  -3    0.21    0.03
   3   7  -3    0.20    0.04
   3   7   3    0.19    0.03
  -3  -7   3    0.20    0.04
   3  -7  -3    0.20    0.03
   3   7   3    0.18    0.04
   3  -7  -3    0.20    0.04
  -3   7  -3    0.22    0.04
  -5  -7  -3    2.69    0.10
  -5   7   3    2.38    0.09
   5  -7   3    2.53    0.10
  -5   7   3    2.47    0.11
   5   7  -3    2.48    0.11
   5   7  -3    2.06    0.11
   5  -7   3    2.48    0.11
  -5   7  -3    2.59    0.10
   5   7   3    2.46    0.08
   5  -7  -3    2.54    0.11
   5   7   3    2.46    0.11
  -5  -7   3    2.50    0.11
   5  -7  -3    2.50    0.10
   5   7   3    2.56    0.11
   7  -7   3    0.26    0.03
  -7   7   3    0.38    0.05
  -7  -7  -3    0.31    0.04
   7  -7   3    0.29    0.05
   7   7  -3    0.25    0.05
   7  -7   3    0.31    0.04
   7   7  -3    0.39    0.06
  -7   7   3    0.34    0.04
   7  -7  -3    0.35    0.04
   7  -7  -3    0.24    0.04
   7   7   3    0.25    0.03
   7   7   3    0.25    0.04
   7   7   3    0.27    0.05
  -7   7  -3    0.23    0.04
  -7  -7   3    0.26    0.05
  -9   7   3    0.80    0.07
   9   7  -3    0.51    0.06
   9  -7   3    0.79    0.07
   9  -7   3    0.65    0.04
   9  -7   3    0.72    0.07
   9   7  -3    0.83    0.07
  -9   7   3    0.73    0.04
  -9  -7  -3    0.71    0.06
  -9  -7   3    0.74    0.07
   9   7   3    0.82    0.07
   9  -7  -3    0.71    0.06
   9   7   3    0.68    0.04
   9   7   3    0.58    0.07
  -9   7  -3    0.74    0.06
   9  -7  -3    0.63    0.07
 -11   7   3    1.50    0.10
  11   7  -3    1.54    0.10
  11  -7   3    1.52    0.10
 -11  -7  -3    1.63    0.09
 -11   7   3    1.50    0.07
  11   7  -3    1.32    0.10
  11  -7   3    1.61    0.10
  11  -7   3    1.48    0.07
 -11  -7   3    1.34    0.10
 -11  -7   3    1.50    0.05
  11  -7  -3    1.61    0.10
  11   7   3    1.47    0.07
  11   7   3    1.37    0.09
  11   7   3    1.35    0.10
  11  -7  -3    1.50    0.09
 -11   7  -3    1.52    0.09
  13  -7   3    1.21    0.08
 -13   7   3    1.07    0.09
  13   7  -3    1.49    0.11
  13  -7   3    1.16    0.10
  13  -7   3    1.34    0.10
 -13   7   3    1.46    0.07
 -13  -7  -3    1.13    0.09
  13   7  -3    1.36    0.09
  13   7   3    1.33    0.10
 -13  -7   3    1.23    0.10
  13  -7  -3    1.22    0.09
  13  -7  -3    1.09    0.10
  13   7   3    1.25    0.10
 -13  -7   3    1.28    0.06
  13   7   3    1.29    0.07
 -13   7  -3    1.21    0.08
  15  -7   3    1.09    0.10
  15   7  -3    0.98    0.11
  15   7  -3    1.16    0.09
 -15  -7  -3    1.18    0.09
  15  -7   3    1.14    0.09
 -15   7   3    0.86    0.09
  15  -7   3    1.04    0.08
 -15   7   3    1.00    0.06
  15  -7  -3    0.95    0.08
 -15   7  -3    1.13    0.08
  15   7   3    1.20    0.10
  15   7   3    1.15    0.07
 -15  -7   3    1.02    0.10
  15   7   3    1.15    0.10
  15  -7  -3    1.13    0.11
 -15  -7   3    1.07    0.06
 -17   7   3    2.27    0.10
  17  -7   3    2.61    0.14
 -17   7   3    2.36    0.14
  17  -7   3    2.25    0.12
  17  -7   3    2.38    0.14
 -17  -7  -3    2.36    0.13
  17   7  -3    2.33    0.15
  17   7  -3    2.50    0.13
  17   7   3    2.52    0.15
 -17  -7   3    2.37    0.10
  17  -7  -3    2.33    0.15
 -17  -7   3    2.30    0.15
 -17   7  -3    2.25    0.12
  17   7   3    2.45    0.10
  17  -7  -3    2.48    0.14
  17   7   3    2.67    0.15
 -19  -7  -3    0.46    0.08
 -19   7   3    0.47    0.06
 -19   7   3    0.42    0.08
  19  -7   3    0.54    0.09
  19  -7   3    0.56    0.09
  19  -7   3    0.36    0.06
  19   7  -3    0.44    0.09
  19   7  -3    0.47    0.07
 -19  -7   3    0.50    0.06
 -19   7  -3    0.47    0.07
  19   7   3    0.57    0.09
  19   7   3    0.56    0.06
 -19  -7   3    0.47    0.08
  19   7   3    0.46    0.09
  19  -7  -3    0.52    0.09
  19  -7  -3    0.41    0.08
  21   7  -3    2.76    0.16
 -21   7   3    2.81    0.17
  21   7  -3    2.71    0.19
 -21  -7  -3    2.86    0.17
  21  -7   3    2.86    0.15
  21  -7   3    2.66    0.17
  21  -7   3    2.93    0.17
  21   7   3    2.77    0.17
  21   7   3    2.93    0.13
 -21   7  -3    2.71    0.15
  21  -7  -3    2.90    0.18
  21   7   3    3.26    0.19
  21  -7  -3    2.66    0.17
 -21  -7   3    2.80    0.18
  23   7  -3   -0.01    0.06
 -23   7   3   -0.01    0.05
  23  -7   3   -0.01    0.05
  23  -7   3    0.02    0.04
  23   7  -3   -0.01    0.05
  23  -7   3   -0.07    0.04
 -23  -7  -3    0.10    0.06
  23   7   3    0.03    0.06
  23  -7  -3   -0.03    0.05
 -23  -7   3   -0.01    0.06
  23  -7  -3    0.02    0.05
  23   7   3    0.01    0.05
 -23   7  -3    0.04    0.05
  23   7   3    0.01    0.03
  25  -7   3    2.38    0.16
  25   7  -3    2.14    0.19
 -25  -7  -3    2.03    0.16
  25  -7   3    2.12    0.17
 -25   7   3    2.23    0.17
  25   7  -3    2.09    0.15
  25  -7  -3    2.05    0.17
 -25   7  -3    1.98    0.16
  25   7   3    2.14    0.18
  25   7   3    1.98    0.16
  25  -7  -3    1.82    0.16
 -25  -7   3    2.21    0.18
  27  -7   3    1.40    0.16
 -27  -7  -3    1.39    0.15
  27   7  -3    1.58    0.18
  27  -7   3    1.39    0.14
  27   7  -3    1.29    0.14
 -27   7   3    1.27    0.15
  27  -7  -3    1.39    0.16
  27  -7  -3    1.51    0.17
 -27  -7   3    1.49    0.17
 -27   7  -3    1.19    0.14
  27   7   3    1.38    0.17
  27   7   3    1.74    0.17
  29  -7   3    3.03    0.22
 -29  -7  -3    3.37    0.22
  29   7  -3    3.22    0.24
 -29   7   3    3.43    0.22
 -29   7  -3    3.64    0.22
  29  -7  -3    3.57    0.23
 -29  -7   3    3.10    0.23
  29  -7  -3    3.47    0.24
  29   7   3    3.36    0.22
  29   7   3    3.51    0.24
  31  -7   3    0.39    0.11
 -31   7   3    0.28    0.10
 -31  -7  -3    0.41    0.12
  31   7  -3    0.49    0.12
  31   7   3    0.58    0.13
 -31  -7   3    0.50    0.13
  31   7   3    0.50    0.11
  31  -7  -3    0.45    0.12
 -31   7  -3    0.45    0.11
  31  -7  -3    0.62    0.13
 -33   7   3    0.94    0.15
 -33  -7  -3    0.93    0.15
  33  -7   3    1.14    0.17
  33   7  -3    1.05    0.18
  33  -7  -3    0.95    0.16
 -33   7  -3    1.19    0.16
  33   7   3    0.98    0.17
  33  -7  -3    1.04    0.17
 -33  -7   3    1.18    0.17
 -35   7   3   -0.13    0.08
 -35  -7  -3    0.14    0.10
  35   7  -3    0.15    0.11
  35  -7   3   -0.03    0.08
  35   7   3    0.05    0.09
 -35   7  -3    0.13    0.09
 -35  -7   3    0.08    0.11
  35  -7  -3    0.02    0.09
  37   7  -3    1.94    0.25
 -37  -7  -3    2.03    0.23
  37  -7   3    2.13    0.24
 -37   7   3    2.07    0.23
 -37   7  -3    1.76    0.21
  37   7   3    2.15    0.26
 -37  -7   3    1.93    0.24
  37  -7  -3    2.17    0.24
  39   7  -3    0.05    0.12
  39  -7   3    0.18    0.11
  39  -7  -3    0.11    0.10
 -39  -7   3    0.14    0.12
  39   7   3    0.05    0.10
  41  -7   3    2.47    0.27
  41   7  -3    1.81    0.26
  41   7   3    1.72    0.25
  41  -7  -3    2.34    0.27
 -41  -7   3    2.13    0.27
  -1   9   3    1.54    0.08
  -1   9   3    1.75    0.09
   1  -9   3    1.47    0.07
   1  -9   3    1.65    0.07
  -1  -9  -3    1.60    0.08
   1   9  -3    1.55    0.07
   1  -9   3    1.57    0.09
   1   9  -3    1.54    0.10
  -1  -9  -3    1.50    0.08
   1  -9  -3    1.62    0.08
  -1  -9   3    1.55    0.06
   1   9   3    1.52    0.08
  -1  -9   3    1.44    0.08
  -1   9  -3    1.45    0.09
   1  -9  -3    1.69    0.08
   1   9   3    1.57    0.09
   3  -9   3    0.64    0.04
  -3  -9  -3    0.68    0.05
   3   9  -3    0.65    0.05
   3  -9   3    0.63    0.05
   3   9  -3    0.71    0.08
  -3   9   3    0.73    0.07
   3  -9   3    0.46    0.05
   3   9  -3    0.60    0.04
  -3   9   3    0.58    0.05
  -3  -9  -3    0.59    0.06
   3  -9  -3    0.63    0.05
   3   9   3    0.66    0.06
   3  -9  -3    0.66    0.06
   3   9   3    0.59    0.05
  -3   9  -3    0.59    0.06
  -3  -9   3    0.55    0.06
   5   9  -3    0.17    0.04
   5  -9   3    0.25    0.04
  -5  -9  -3    0.15    0.03
   5  -9   3    0.23    0.02
   5   9  -3    0.23    0.04
  -5   9   3    0.20    0.04
  -5   9   3    0.20    0.04
   5  -9   3    0.18    0.04
  -5  -9  -3    0.29    0.05
  -5   9  -3    0.18    0.04
   5  -9  -3    0.22    0.04
   5  -9  -3    0.24    0.04
   5   9   3    0.19    0.03
  -5  -9   3    0.14    0.04
   5   9   3    0.18    0.04
  -7   9   3    0.62    0.06
   7  -9   3    0.75    0.08
   7  -9   3    0.56    0.03
   7   9  -3    0.52    0.06
   7   9  -3    0.60    0.07
  -7  -9  -3    0.54    0.06
  -7   9   3    0.69    0.07
   7  -9   3    0.56    0.06
   7  -9  -3    0.68    0.07
   7  -9  -3    0.55    0.05
   7   9   3    0.52    0.06
   7   9   3    0.57    0.07
  -7   9  -3    0.54    0.06
  -7  -9   3    0.58    0.07
   7   9   3    0.52    0.04
   9   9  -3    0.31    0.06
   9  -9   3    0.37    0.06
  -9  -9  -3    0.32    0.05
   9  -9   3    0.25    0.03
   9  -9   3    0.28    0.05
   9   9  -3    0.25    0.05
  -9   9   3    0.33    0.04
  -9   9   3    0.30    0.05
   9   9   3    0.18    0.04
   9  -9  -3    0.32    0.05
  -9   9  -3    0.26    0.05
   9   9   3    0.30    0.03
   9  -9  -3    0.27    0.05
   9   9   3    0.35    0.06
  -9  -9   3    0.28    0.05
 -11  -9  -3    4.17    0.16
 -11   9   3    4.18    0.14
 -11   9   3    4.17    0.17
  11   9  -3    4.35    0.18
  11   9  -3    4.62    0.19
  11  -9   3    4.36    0.17
  11  -9   3    4.22    0.18
  11  -9   3    4.09    0.14
  11   9   3    4.16    0.12
  11   9   3    4.08    0.17
 -11  -9   3    4.09    0.18
  11  -9  -3    4.34    0.16
 -11   9  -3    4.16    0.16
  11   9   3    3.86    0.17
  11  -9  -3    4.22    0.18
 -13   9   3    0.26    0.04
  13   9  -3    0.35    0.07
 -13  -9  -3    0.32    0.06
  13  -9   3    0.26    0.06
  13   9  -3    0.32    0.06
 -13   9   3    0.35    0.06
  13  -9   3    0.32    0.05
  13  -9   3    0.21    0.05
 -13   9  -3    0.26    0.05
  13   9   3    0.13    0.05
  13  -9  -3    0.40    0.06
  13   9   3    0.31    0.04
 -13  -9   3    0.40    0.07
  13  -9  -3    0.28    0.06
  13   9   3    0.31    0.06
 -15   9   3    5.65    0.17
  15  -9   3    5.56    0.22
 -15   9   3    5.41    0.22
 -15  -9  -3    5.39    0.21
  15  -9   3    5.30    0.18
  15  -9   3    5.55    0.22
  15   9  -3    5.49    0.23
  15   9  -3    5.75    0.22
  15   9   3    5.46    0.22
 -15  -9   3    5.47    0.23
  15  -9  -3    5.53    0.20
 -15  -9   3    5.17    0.14
  15  -9  -3    5.69    0.23
  15   9   3    5.64    0.16
 -15   9  -3    5.37    0.20
  15   9   3    5.39    0.23
  17   9  -3    2.38    0.14
 -17   9   3    2.30    0.14
  17  -9   3    2.17    0.11
 -17  -9  -3    2.45    0.14
  17  -9   3    2.45    0.15
  17   9  -3    2.06    0.15
 -17   9   3    2.21    0.10
  17  -9   3    2.25    0.15
 -17  -9   3    2.31    0.15
  17  -9  -3    2.29    0.13
 -17  -9   3    2.42    0.09
  17  -9  -3    2.26    0.15
  17   9   3    2.39    0.16
 -17   9  -3    2.37    0.13
  17   9   3    2.38    0.14
  17   9   3    2.36    0.10
 -19  -9  -3    0.07    0.05
 -19   9   3    0.09    0.04
  19  -9   3    0.10    0.05
  19  -9   3    0.12    0.05
  19   9  -3    0.03    0.05
 -19   9   3    0.10    0.05
  19  -9   3    0.18    0.05
  19   9  -3    0.12    0.05
 -19  -9   3    0.07    0.06
 -19   9  -3    0.10    0.05
  19   9   3    0.07    0.05
  19  -9  -3    0.06    0.04
  19   9   3    0.03    0.03
  19   9   3    0.04    0.06
  19  -9  -3    0.14    0.06
  21   9  -3    0.98    0.13
  21  -9   3    1.23    0.13
  21  -9   3    0.99    0.10
 -21  -9  -3    1.06    0.12
 -21   9   3    0.97    0.12
  21  -9   3    1.04    0.12
  21   9  -3    1.08    0.12
  21  -9  -3    1.10    0.12
  21  -9  -3    1.10    0.13
  21   9   3    0.99    0.14
  21   9   3    1.09    0.13
 -21   9  -3    1.09    0.11
 -21  -9   3    1.09    0.13
  23  -9   3    1.90    0.13
 -23   9   3    2.07    0.16
 -23  -9  -3    1.72    0.15
  23   9  -3    2.04    0.17
  23   9  -3    1.74    0.14
  23  -9   3    1.81    0.16
 -23  -9   3    1.67    0.17
  23  -9  -3    1.63    0.16
  23   9   3    1.91    0.16
  23  -9  -3    1.75    0.14
  23   9   3    1.83    0.17
 -23   9  -3    1.83    0.13
 -23   9  -3    1.98    0.17
 -25   9   3    1.41    0.15
  25   9  -3    1.51    0.18
  25   9  -3    1.50    0.14
  25  -9   3    1.57    0.13
 -25  -9  -3    1.51    0.16
  25  -9   3    1.45    0.16
  25   9   3    1.34    0.15
  25  -9  -3    1.44    0.16
  25   9   3    1.68    0.18
 -25  -9   3    1.40    0.16
  25  -9  -3    1.49    0.15
 -25   9  -3    1.45    0.16
  27   9  -3    0.17    0.08
 -27  -9  -3    0.11    0.08
  27  -9   3    0.07    0.07
  27   9  -3    0.05    0.06
 -27   9   3    0.17    0.08
  27   9   3    0.11    0.07
  27   9   3    0.23    0.10
 -27   9  -3    0.20    0.09
  27  -9  -3    0.15    0.07
  27  -9  -3    0.01    0.07
 -27  -9   3    0.05    0.08
 -29   9   3    2.62    0.20
  29  -9   3    2.67    0.21
  29   9  -3    3.05    0.23
  29   9  -3    2.99    0.20
 -29  -9  -3    3.32    0.22
 -29  -9   3    2.72    0.22
  29   9   3    2.70    0.20
  29  -9  -3    2.67    0.20
  29  -9  -3    2.78    0.22
 -29   9  -3    2.75    0.20
  29   9   3    2.85    0.23
  31   9  -3    0.34    0.12
 -31   9   3    0.25    0.11
  31  -9   3    0.29    0.10
 -31  -9  -3    0.17    0.09
 -31  -9   3    0.28    0.11
 -31   9  -3    0.28    0.10
  31  -9  -3    0.40    0.11
  31   9   3    0.44    0.12
  31   9   3    0.42    0.11
 -33   9   3    0.56    0.13
  33   9  -3    0.50    0.14
  33  -9   3    0.50    0.12
 -33  -9  -3    0.54    0.13
 -33  -9   3    0.50    0.14
 -33   9  -3    0.63    0.13
  33  -9  -3    0.49    0.13
  33   9   3    0.56    0.14
 -35   9   3    0.08    0.10
 -35  -9  -3    0.17    0.11
  35   9  -3    0.21    0.12
  35  -9   3    0.20    0.11
 -35  -9   3    0.20    0.12
  35   9   3    0.03    0.10
 -35   9  -3    0.01    0.10
  35  -9  -3    0.16    0.10
  37  -9   3    2.55    0.26
 -37   9   3    2.70    0.26
  37   9  -3    2.42    0.28
 -37   9  -3    2.51    0.25
  37   9   3    2.25    0.26
  37  -9  -3    2.78    0.28
 -37  -9   3    2.89    0.29
  39   9  -3    0.08    0.11
 -39   9   3    0.26    0.14
  39  -9   3    0.44    0.14
 -39   9  -3    0.33    0.13
  39  -9  -3    0.52    0.14
  39   9   3    0.37    0.15
 -39  -9   3    0.32    0.14
  41   9  -3    0.40    0.15
  41  -9   3    0.43    0.14
  41  -9  -3    0.53    0.16
 -41  -9   3    0.26    0.14
  41   9   3    0.43    0.14
   1  11  -3    1.15    0.10
   1 -11   3    1.19    0.07
   1  11  -3    1.18    0.07
  -1  11   3    0.97    0.07
  -1 -11  -3    1.14    0.08
  -1  11   3    1.10    0.08
   1 -11   3    1.06    0.08
   1  11  -3    1.08    0.06
   1 -11   3    1.13    0.06
  -1 -11  -3    1.20    0.08
   1  11   3    1.04    0.07
   1 -11  -3    1.09    0.08
  -1  11  -3    1.25    0.09
   1 -11  -3    1.18    0.08
   1  11   3    1.02    0.08
  -1 -11   3    1.20    0.08
   3 -11   3    0.83    0.06
   3  11  -3    0.76    0.06
   3 -11   3    0.79    0.05
  -3 -11  -3    0.62    0.06
  -3 -11  -3    0.80    0.07
   3 -11   3    0.87    0.07
   3  11  -3    0.77    0.04
  -3  11   3    0.78    0.08
  -3  11   3    0.74    0.07
   3  11  -3    0.83    0.09
   3  11   3    0.79    0.08
   3  11   3    0.72    0.05
   3 -11  -3    0.85    0.07
  -3  11  -3    0.75    0.08
  -3 -11   3    0.77    0.08
   3 -11  -3    0.77    0.06
   5  11  -3    7.73    0.24
  -5  11   3    7.74    0.24
  -5 -11  -3    8.17    0.23
   5 -11   3    7.76    0.25
   5  11  -3    7.07    0.26
   5  11  -3    7.25    0.18
   5 -11   3    7.87    0.24
   5 -11   3    7.91    0.19
  -5 -11  -3    7.83    0.25
  -5  11   3    7.98    0.25
   5 -11  -3    7.87    0.24
   5 -11  -3    8.01    0.23
  -5 -11   3    8.09    0.25
   5  11   3    8.00    0.26
  -5  11  -3    8.49    0.25
   5  11   3    7.64    0.20
  -7 -11  -3    0.65    0.07
   7 -11   3    0.78    0.08
  -7  11   3    0.65    0.07
   7 -11   3    0.64    0.07
   7  11  -3    0.66    0.07
  -7  11   3    0.71    0.07
   7  11  -3    0.70    0.08
   7 -11   3    0.71    0.04
   7  11   3    0.79    0.09
   7  11   3    0.75    0.08
   7 -11  -3    0.64    0.08
  -7  11  -3    0.64    0.07
  -7 -11   3    0.42    0.06
   7 -11  -3    0.66    0.06
   7  11   3    0.74    0.05
   9 -11   3    1.37    0.06
   9 -11   3    1.77    0.11
   9 -11   3    1.49    0.10
  -9  11   3    1.49    0.09
   9  11  -3    1.30    0.11
  -9  11   3    1.53    0.10
   9 -11  -3    1.44    0.10
   9 -11  -3    1.42    0.08
  -9  11  -3    1.33    0.09
   9  11   3    1.53    0.11
  11  11  -3    0.61    0.08
 -11  11   3    0.41    0.07
 -11  11   3    0.61    0.06
 -11 -11  -3    0.43    0.06
  11 -11   3    0.47    0.07
  11 -11   3    0.47    0.07
  11  11  -3    0.57    0.09
  11 -11   3    0.53    0.04
  11  11   3    0.54    0.08
 -11  11  -3    0.63    0.07
  11  11   3    0.44    0.07
  11 -11  -3    0.61    0.06
  11 -11  -3    0.53    0.08
  11  11   3    0.48    0.04
 -11 -11   3    0.51    0.08
  13 -11   3    0.82    0.06
  13  11  -3    0.93    0.10
 -13  11   3    0.97    0.07
  13  11  -3    0.93    0.10
 -13  11   3    0.78    0.09
  13 -11   3    0.81    0.10
 -13 -11  -3    0.80    0.09
  13 -11   3    0.86    0.09
 -13  11  -3    0.87    0.08
  13  11   3    0.75    0.09
  13  11   3    1.00    0.10
 -13 -11   3    0.73    0.09
  13 -11  -3    0.80    0.07
  13  11   3    0.88    0.05
  13 -11  -3    0.81    0.10
  15  11  -3    0.59    0.09
 -15  11   3    0.57    0.08
 -15 -11  -3    0.61    0.08
  15 -11   3    0.58    0.06
  15  11  -3    0.41    0.08
  15 -11   3    0.56    0.08
 -15  11   3    0.62    0.06
  15 -11   3    0.61    0.09
  15 -11  -3    0.48    0.08
  15  11   3    0.54    0.08
 -15 -11   3    0.55    0.08
  15  11   3    0.58    0.05
  15 -11  -3    0.61    0.08
  15  11   3    0.56    0.09
 -15  11  -3    0.55    0.07
  17 -11   3    3.70    0.19
  17  11  -3    3.60    0.20
 -17 -11  -3    3.41    0.17
 -17  11   3    3.59    0.18
  17  11  -3    3.54    0.18
  17 -11   3    3.50    0.15
 -17  11   3    3.30    0.13
  17 -11   3    3.87    0.19
 -17 -11   3    3.58    0.19
  17 -11  -3    3.64    0.20
  17  11   3    3.87    0.20
  17 -11  -3    3.32    0.16
 -17  11  -3    3.58    0.16
  17  11   3    3.94    0.20
  17  11   3    3.64    0.12
 -19 -11  -3    0.75    0.10
  19 -11   3    0.94    0.11
  19  11  -3    0.57    0.09
 -19  11   3    0.77    0.10
  19 -11   3    0.80    0.11
  19 -11   3    0.79    0.08
  19  11  -3    0.75    0.12
  19 -11  -3    0.81    0.10
 -19  11  -3    0.68    0.09
  19 -11  -3    0.72    0.11
 -19 -11   3    0.70    0.11
  19  11   3    0.94    0.12
  19  11   3    0.83    0.12
 -21  11   3    2.29    0.16
  21 -11   3    2.40    0.13
  21  11  -3    2.14    0.17
  21 -11   3    2.18    0.17
  21  11  -3    1.94    0.15
 -21 -11  -3    2.14    0.15
  21 -11  -3    2.24    0.15
 -21  11  -3    2.41    0.17
  21  11   3    2.05    0.16
 -21  11  -3    1.98    0.13
  21 -11  -3    2.23    0.17
  21  11   3    2.23    0.17
 -21 -11   3    2.19    0.17
 -23 -11  -3    5.65    0.26
  23  11  -3    5.64    0.26
  23  11  -3    5.26    0.28
  23 -11   3    6.14    0.28
 -23  11   3    5.39    0.26
 -23 -11   3    5.75    0.28
  23  11   3    4.74    0.27
  23 -11  -3    5.24    0.27
  23  11   3    5.54    0.26
  23 -11  -3    5.49    0.25
 -23  11  -3    6.03    0.28
 -25 -11  -3    0.34    0.09
  25 -11   3    0.46    0.10
  25  11  -3    0.16    0.07
  25  11  -3    0.30    0.10
 -25  11   3    0.39    0.10
  25 -11  -3    0.37    0.10
  25  11   3    0.40    0.10
  25  11   3    0.39    0.10
  25 -11  -3    0.33    0.08
 -25  11  -3    0.12    0.08
 -25 -11   3    0.21    0.09
  27  11  -3    0.36    0.11
  27 -11   3    0.25    0.10
 -27  11   3    0.38    0.11
  27  11  -3    0.28    0.09
 -27 -11  -3    0.41    0.10
  27  11   3    0.47    0.11
 -27 -11   3    0.50    0.11
 -27  11  -3    0.40    0.10
  27 -11  -3    0.33    0.10
  27 -11  -3    0.31    0.09
  27  11   3    0.27    0.10
 -29  11   3    3.44    0.23
 -29 -11  -3    3.35    0.23
  29  11  -3    3.23    0.22
  29  11  -3    3.08    0.25
  29 -11   3    3.76    0.25
 -29  11  -3    3.43    0.23
 -29 -11   3    3.24    0.24
  29  11   3    2.85    0.23
  29 -11  -3    3.27    0.24
  29  11   3    3.41    0.23
 -31  11   3    0.05    0.09
  31  11  -3    0.02    0.09
  31 -11   3    0.04    0.08
 -31 -11  -3    0.29    0.11
 -31 -11   3    0.09    0.10
 -31  11  -3    0.10    0.08
  31  11   3    0.20    0.11
  31 -11  -3    0.03    0.08
  31  11   3   -0.10    0.06
  33 -11   3    2.90    0.24
  33  11  -3    2.85    0.26
 -33 -11  -3    2.87    0.24
 -33  11   3    2.49    0.24
  33 -11  -3    2.61    0.25
  33  11   3    2.91    0.25
 -33 -11   3    2.87    0.25
  33  11   3    2.30    0.21
 -33  11  -3    3.13    0.24
  35  11  -3    0.12    0.11
  35 -11   3    0.05    0.09
 -35  11   3    0.02    0.09
  35 -11  -3    0.19    0.11
 -35 -11   3    0.05    0.11
  35  11   3    0.06    0.10
 -35  11  -3    0.10    0.10
  37  11  -3    1.63    0.23
  37 -11   3    1.68    0.22
 -37  11   3    1.40    0.20
 -37 -11   3    1.64    0.23
  37 -11  -3    1.15    0.20
 -37  11  -3    1.46    0.20
  37  11   3    0.84    0.18
 -39  11   3    0.19    0.13
  39 -11   3    0.41    0.15
  39  11  -3    0.44    0.15
  39  11   3    0.17    0.13
 -39 -11   3    0.24    0.13
 -39  11  -3    0.05    0.11
  39 -11  -3    0.26    0.13
  41 -11   3    0.46    0.15
  41  11  -3    0.80    0.19
 -41  11  -3    0.91    0.18
 -41 -11   3    0.27    0.15
  41  11   3    0.79    0.18
  -1  13   3    4.55    0.18
   1 -13   3    4.85    0.15
   1  13  -3    4.62    0.20
  -1 -13  -3    4.63    0.17
  -1  13   3    4.29    0.17
   1 -13   3    4.62    0.18
  -1 -13  -3    4.95    0.18
   1  13  -3    4.75    0.15
   1 -13  -3    4.81    0.17
   1  13   3    4.38    0.16
   1  13   3    4.73    0.19
  -1  13  -3    4.53    0.16
   1 -13  -3    4.56    0.17
  -1 -13   3    4.51    0.16
  -1  13  -3    4.32    0.20
  -1 -13   3    4.63    0.18
   3 -13   3    1.33    0.10
   3  13  -3    1.25    0.06
  -3 -13  -3    1.43    0.10
  -3  13   3    1.37    0.10
   3 -13   3    1.40    0.07
  -3 -13  -3    1.29    0.09
  -3  13   3    1.32    0.09
   3  13  -3    1.23    0.11
   3 -13   3    1.24    0.08
   3  13  -3    1.13    0.08
   3  13   3    1.34    0.08
   3 -13  -3    1.25    0.09
  -3  13  -3    1.26    0.08
  -3  13  -3    1.24    0.11
   3  13   3    1.39    0.11
   3 -13  -3    1.24    0.08
   5 -13   3    0.42    0.04
   5  13  -3    0.42    0.08
   5 -13   3    0.38    0.06
  -5  13   3    0.40    0.06
  -5 -13  -3    0.28    0.06
   5  13  -3    0.38    0.04
  -5  13   3    0.39    0.06
   5  13  -3    0.46    0.06
  -5 -13  -3    0.35    0.06
   5 -13   3    0.44    0.07
  -5 -13   3    0.34    0.06
   5 -13  -3    0.36    0.06
   5  13   3    0.35    0.04
   5  13   3    0.37    0.07
  -5  13  -3    0.43    0.07
   5 -13  -3    0.41    0.05
  -7 -13  -3    0.55    0.08
   7  13  -3    0.70    0.09
  -7  13   3    0.61    0.08
  -7  13   3    0.79    0.08
   7  13  -3    0.72    0.08
   7 -13   3    0.75    0.08
   7 -13   3    0.64    0.04
  -7 -13  -3    0.59    0.07
   7 -13   3    0.50    0.07
  -7 -13   3    0.65    0.08
  -7  13  -3    0.66    0.08
   7 -13  -3    0.67    0.07
   7 -13  -3    0.54    0.07
   7  13   3    0.54    0.04
   7  13   3    0.84    0.10
   9 -13   3    0.44    0.04
   9 -13   3    0.44    0.07
  -9 -13  -3    0.46    0.07
  -9  13   3    0.46    0.07
   9  13  -3    0.37    0.07
   9  13  -3    0.39    0.07
  -9  13   3    0.48    0.07
   9 -13   3    0.39    0.07
   9 -13  -3    0.34    0.06
   9  13   3    0.46    0.04
   9 -13  -3    0.55    0.06
  -9  13  -3    0.37    0.06
   9  13   3    0.47    0.08
  -9 -13   3    0.61    0.08
   9  13   3    0.50    0.08
 -11  13   3    1.46    0.10
  11 -13   3    1.61    0.11
  11  13  -3    1.32    0.12
  11 -13   3    1.68    0.12
 -11  13   3    1.72    0.12
  11  13  -3    1.53    0.12
 -11 -13  -3    1.65    0.11
  11 -13   3    1.71    0.07
  11  13   3    1.54    0.06
  11  13   3    1.52    0.12
  11 -13  -3    1.69    0.09
 -11 -13   3    1.56    0.12
 -11  13  -3    1.68    0.11
  11  13   3    1.74    0.13
  11 -13  -3    1.53    0.12
  13 -13   3    1.05    0.07
 -13  13   3    0.94    0.08
  13  13  -3    1.07    0.11
 -13  13   3    1.15    0.12
  13 -13   3    1.08    0.11
 -13 -13  -3    1.17    0.10
  13 -13   3    1.22    0.12
  13  13  -3    1.11    0.12
 -13  13  -3    0.94    0.08
  13  13   3    0.97    0.11
 -13 -13   3    1.19    0.12
  13  13   3    1.03    0.05
  13 -13  -3    1.09    0.12
  13 -13  -3    1.01    0.08
  13  13   3    1.26    0.11
  15 -13   3    0.39    0.08
  15  13  -3    0.60    0.09
 -15  13   3    0.41    0.08
  15 -13   3    0.62    0.09
 -15 -13  -3    0.50    0.08
 -15  13   3    0.46    0.06
  15  13  -3    0.50    0.09
  15 -13   3    0.43    0.05
 -15 -13   3    0.42    0.08
  15  13   3    0.62    0.10
  15 -13  -3    0.55    0.07
  15 -13  -3    0.46    0.08
  15  13   3    0.32    0.08
 -15  13  -3    0.40    0.06
 -17  13   3    2.77    0.13
 -17  13   3    2.89    0.17
  17  13  -3    2.69    0.18
  17 -13   3    2.99    0.18
  17 -13   3    3.13    0.18
 -17 -13  -3    2.81    0.16
  17  13  -3    2.57    0.17
  17 -13   3    2.91    0.13
 -17  13  -3    2.76    0.14
 -17  13  -3    2.58    0.17
  17  13   3    3.07    0.18
  17 -13  -3    2.70    0.14
  17  13   3    3.09    0.19
  17 -13  -3    2.46    0.17
 -17 -13   3    2.99    0.18
  19 -13   3    0.44    0.09
 -19 -13  -3    0.27    0.07
  19  13  -3    0.61    0.11
 -19  13   3    0.48    0.09
  19  13  -3    0.49    0.10
 -19 -13   3    0.45    0.09
  19  13   3    0.44    0.09
  19  13   3    0.31    0.09
  19 -13  -3    0.53    0.10
 -19  13  -3    0.62    0.08
 -19  13  -3    0.53    0.09
  19 -13  -3    0.47    0.08
  21 -13   3    1.02    0.13
 -21 -13  -3    1.13    0.13
  21  13  -3    0.81    0.12
  21  13  -3    1.08    0.15
 -21  13   3    1.08    0.14
  21 -13  -3    0.83    0.12
  21  13   3    0.87    0.12
  21 -13  -3    0.99    0.12
 -21  13  -3    0.95    0.10
 -21  13  -3    0.96    0.13
 -21 -13   3    0.94    0.13
  21  13   3    0.85    0.13
 -23  13   3    3.16    0.21
  23  13  -3    2.79    0.21
 -23 -13  -3    3.24    0.20
  23 -13   3    3.36    0.22
  23  13  -3    3.13    0.20
  23 -13  -3    2.88    0.21
  23 -13  -3    3.20    0.19
  23  13   3    3.21    0.21
  23  13   3    3.41    0.23
 -23  13  -3    3.31    0.21
 -23 -13   3    2.95    0.21
 -25  13   3    0.16    0.09
  25  13  -3    0.13    0.07
 -25 -13  -3    0.17    0.08
  25 -13   3    0.19    0.08
  25  13  -3    0.11    0.09
 -25 -13   3    0.04    0.08
  25 -13  -3    0.04    0.07
 -25  13  -3    0.02    0.07
  25  13   3    0.15    0.08
  25  13   3    0.31    0.10
 -27  13   3    0.44    0.11
 -27 -13  -3    0.46    0.11
  27 -13   3    0.26    0.09
  27  13  -3    0.35    0.11
  27  13  -3    0.36    0.10
 -27  13  -3    0.47    0.11
  27  13   3    0.53    0.12
 -27 -13   3    0.43    0.12
  27  13   3    0.40    0.12
  27 -13  -3    0.31    0.10
  29 -13   3    3.71    0.25
 -29  13   3    3.52    0.25
  29  13  -3    3.93    0.24
  29  13  -3    3.61    0.26
 -29 -13  -3    3.72    0.24
  29  13   3    3.36    0.25
 -29 -13   3    3.44    0.24
 -29  13  -3    3.43    0.24
  29  13   3    3.43    0.24
  29 -13  -3    3.23    0.24
 -31  13   3    0.77    0.15
  31 -13   3    0.85    0.16
  31  13  -3    0.80    0.16
 -31 -13  -3    1.02    0.16
  31  13   3    0.76    0.14
 -31 -13   3    0.98    0.16
  31  13   3    0.97    0.16
  31 -13  -3    1.17    0.18
 -31  13  -3    0.67    0.14
  33  13  -3    1.12    0.19
  33 -13   3    0.94    0.17
 -33  13   3    1.08    0.18
 -33 -13  -3    1.24    0.18
  33  13   3    1.03    0.18
  33  13   3    1.16    0.18
 -33 -13   3    1.05    0.18
  33 -13  -3    1.01    0.18
 -33  13  -3    1.16    0.17
 -35  13   3    0.46    0.14
  35 -13   3    0.37    0.13
  35  13  -3    0.40    0.13
  35  13   3    0.10    0.11
 -35  13  -3    0.18    0.12
 -35 -13   3    0.36    0.14
  35 -13  -3    0.54    0.14
 -37  13   3    0.77    0.17
  37 -13   3    0.81    0.17
  37  13  -3    0.60    0.16
 -37  13  -3    0.29    0.14
  37 -13  -3    0.39    0.14
  37  13   3    0.59    0.16
 -37 -13   3    0.75    0.17
 -39  13   3    0.08    0.12
  39 -13   3    0.28    0.13
  39  13  -3   -0.03    0.10
 -39 -13   3    0.07    0.13
  39 -13  -3    0.11    0.12
 -39  13  -3    0.02    0.11
  39  13   3    0.18    0.13
   1 -15   3    0.39    0.05
  -1 -15  -3    0.42    0.06
  -1 -15  -3    0.33    0.06
   1  15  -3    0.61    0.09
   1  15  -3    0.43    0.05
   1 -15   3    0.44    0.07
  -1  15   3    0.41    0.06
  -1  15   3    0.47    0.07
   1  15   3    0.36    0.06
  -1 -15   3    0.40    0.06
   1  15   3    0.44    0.07
   1 -15  -3    0.44    0.06
  -1 -15   3    0.50    0.07
  -1  15  -3    0.48    0.08
  -1  15  -3    0.50    0.06
   1 -15  -3    0.50    0.07
   3  15  -3    2.09    0.14
  -3 -15  -3    1.89    0.11
   3 -15   3    1.93    0.09
  -3  15   3    1.84    0.11
   3  15  -3    2.05    0.11
   3  15  -3    2.07    0.09
   3 -15   3    2.07    0.13
  -3 -15  -3    1.89    0.12
  -3  15   3    1.97    0.12
  -3  15  -3    2.33    0.14
   3 -15  -3    1.94    0.11
   3 -15  -3    1.76    0.11
   3  15   3    2.00    0.13
   3  15   3    1.97    0.10
  -3 -15   3    2.06    0.12
  -3  15  -3    2.19    0.11
  -5  15   3   11.98    0.36
  -5 -15  -3   11.97    0.35
   5  15  -3   12.25    0.30
   5  15  -3   11.95    0.39
   5  15  -3   12.77    0.35
  -5 -15  -3   11.87    0.37
  -5  15   3   12.42    0.36
   5 -15   3   12.37    0.31
   5 -15   3   12.52    0.37
  -5 -15   3   12.30    0.37
   5 -15  -3   12.58    0.37
  -5  15  -3   12.26    0.35
   5 -15  -3   12.47    0.34
   5  15   3   12.57    0.39
   5  15   3   12.34    0.32
  -5  15  -3   12.66    0.38
   7 -15   3    0.52    0.08
  -7 -15  -3    0.65    0.08
  -7 -15  -3    0.62    0.09
   7 -15   3    0.66    0.05
  -7  15   3    0.57    0.08
  -7  15   3    0.61    0.08
   7  15  -3    0.69    0.10
   7  15  -3    0.58    0.07
   7  15   3    0.56    0.05
   7  15   3    0.56    0.08
  -7  15  -3    0.53    0.08
   7 -15  -3    0.55    0.08
  -7  15  -3    0.66    0.08
   7 -15  -3    0.68    0.07
  -7 -15   3    0.58    0.08
  -9 -15  -3    3.94    0.17
  -9 -15  -3    4.12    0.20
   9  15  -3    4.36    0.19
   9 -15   3    4.28    0.13
   9 -15   3    3.90    0.19
  -9  15   3    4.29    0.18
  -9  15   3    3.90    0.18
   9  15  -3    3.96    0.20
   9  15   3    4.73    0.21
  -9  15  -3    4.27    0.18
   9  15   3    4.10    0.12
  -9 -15   3    4.12    0.19
   9 -15  -3    4.16    0.16
  -9  15  -3    4.18    0.19
   9 -15  -3    4.04    0.19
 -11 -15  -3    0.26    0.06
  11 -15   3    0.24    0.06
  11 -15   3    0.27    0.04
 -11  15   3    0.16    0.06
  11  15  -3    0.19    0.06
  11  15  -3    0.15    0.06
 -11  15   3    0.20    0.06
 -11  15  -3    0.18    0.06
  11  15   3    0.19    0.06
 -11 -15   3    0.21    0.06
  11  15   3    0.16    0.03
  11  15   3    0.23    0.07
  11 -15  -3    0.19    0.04
  11 -15  -3    0.27    0.07
 -11  15  -3    0.06    0.05
 -13  15   3    1.40    0.12
 -13 -15  -3    1.48    0.12
 -13  15   3    1.22    0.10
  13  15  -3    1.48    0.13
  13 -15   3    1.44    0.12
  13 -15   3    1.23    0.07
  13  15  -3    1.43    0.12
  13  15   3    1.33    0.14
  13 -15  -3    1.17    0.12
 -13 -15   3    1.03    0.12
 -13  15  -3    1.03    0.11
 -13  15  -3    1.07    0.10
  13 -15  -3    1.32    0.09
  13  15   3    1.29    0.13
  15  15  -3    0.39    0.09
  15 -15   3    0.48    0.09
 -15  15   3    0.57    0.07
  15  15  -3    0.61    0.10
 -15 -15  -3    0.51    0.08
 -15  15   3    0.45    0.08
  15 -15  -3    0.63    0.08
  15  15   3    0.75    0.11
  15  15   3    0.64    0.10
  15 -15  -3    0.43    0.09
 -15  15  -3    0.60    0.08
 -15  15  -3    0.49    0.09
 -15 -15   3    0.54    0.09
 -17  15   3    0.88    0.12
  17 -15   3    1.12    0.13
  17  15  -3    1.00    0.13
 -17 -15  -3    1.10    0.12
  17  15  -3    1.08    0.14
 -17  15  -3    1.11    0.11
  17  15   3    1.02    0.13
 -17  15  -3    0.90    0.12
 -17 -15   3    1.13    0.13
  17 -15  -3    1.10    0.11
  17 -15  -3    0.98    0.12
  17  15   3    1.13    0.14
  19 -15   3    1.17    0.14
  19  15  -3    1.24    0.15
 -19 -15  -3    1.46    0.14
 -19  15   3    0.99    0.13
  19  15  -3    0.92    0.13
  19 -15  -3    1.18    0.14
 -19  15  -3    1.25    0.14
  19 -15  -3    1.17    0.12
 -19 -15   3    1.05    0.13
  19  15   3    1.03    0.13
  19  15   3    1.06    0.14
 -19  15  -3    1.06    0.11
  21  15  -3    3.35    0.23
 -21 -15  -3    3.12    0.19
  21  15  -3    3.17    0.21
  21 -15   3    3.34    0.22
 -21  15   3    3.45    0.21
 -21 -15   3    3.56    0.22
  21  15   3    3.28    0.21
  21  15   3    2.85    0.21
 -21  15  -3    3.28    0.20
 -21  15  -3    2.83    0.18
  21 -15  -3    2.97    0.18
  21 -15  -3    3.34    0.21
  23 -15   3    1.43    0.16
 -23  15   3    1.44    0.16
 -23 -15  -3    1.52    0.15
  23  15  -3    1.76    0.16
  23  15  -3    1.42    0.17
  23 -15  -3    1.56    0.17
  23  15   3    1.54    0.18
  23  15   3    1.75    0.19
 -23  15  -3    1.50    0.16
 -23 -15   3    1.73    0.18
  25  15  -3    3.97    0.27
 -25  15   3    4.31    0.25
 -25 -15  -3    4.74    0.25
  25  15  -3    3.95    0.24
  25 -15   3    4.02    0.25
  25 -15  -3    4.19    0.26
  25  15   3    4.44    0.26
 -25  15  -3    4.31    0.26
  25  15   3    4.71    0.28
 -25 -15   3    4.07    0.25
 -27 -15  -3    0.01    0.07
  27  15  -3    0.02    0.08
 -27  15   3    0.02    0.08
  27 -15   3    0.01    0.07
  27  15  -3   -0.17    0.06
 -27 -15   3   -0.11    0.07
  27  15   3   -0.04    0.08
  27  15   3   -0.03    0.06
  27 -15  -3   -0.02    0.07
 -27  15  -3    0.04    0.08
 -29 -15  -3    3.66    0.24
  29  15  -3    3.22    0.26
  29 -15   3    3.44    0.25
 -29  15   3    3.13    0.24
  29  15  -3    3.89    0.25
 -29 -15   3    3.37    0.25
 -29  15  -3    3.58    0.26
  29  15   3    3.17    0.25
  29  15   3    3.25    0.24
  29 -15  -3    4.38    0.28
 -31 -15  -3   -0.04    0.08
  31  15  -3    0.08    0.10
  31 -15   3   -0.05    0.07
  31  15  -3   -0.05    0.08
 -31  15   3   -0.05    0.08
  31  15   3    0.03    0.09
  31  15   3    0.07    0.09
  31 -15  -3    0.02    0.09
 -31  15  -3    0.05    0.09
 -31 -15   3   -0.03    0.10
  33  15  -3    0.82    0.17
 -33  15   3    1.18    0.19
  33 -15   3    0.92    0.17
 -33  15  -3    1.27    0.18
 -33 -15   3    1.01    0.18
  33  15   3    0.86    0.16
  33 -15  -3    0.91    0.17
  33  15   3    0.82    0.17
 -35  15   3    0.09    0.12
  35 -15   3   -0.04    0.09
  35  15  -3    0.07    0.10
 -35  15  -3   -0.13    0.09
  35 -15  -3    0.05    0.10
  35  15   3    0.14    0.12
 -35 -15   3    0.00    0.11
 -37  15   3    1.85    0.23
  37  15  -3    2.07    0.26
  37 -15   3    1.94    0.24
  37  15   3    1.76    0.25
 -37 -15   3    1.71    0.24
 -37  15  -3    1.58    0.21
  37 -15  -3    1.70    0.23
  39 -15   3    0.08    0.11
 -39  15   3   -0.05    0.11
  39  15  -3   -0.14    0.09
  39 -15  -3    0.00    0.10
  39  15   3   -0.01    0.10
 -39  15  -3   -0.08    0.12
 -39 -15   3    0.14    0.14
  -1 -17  -3    4.56    0.19
   1 -17   3    4.57    0.16
   1 -17   3    4.70    0.20
  -1 -17  -3    4.39    0.19
  -1  17   3    4.05    0.18
  -1  17   3    4.51    0.20
   1  17  -3    4.08    0.15
   1  17  -3    4.26    0.21
  -1 -17   3    4.21    0.19
   1  17   3    4.29    0.17
   1  17   3    4.42    0.20
   1 -17  -3    4.41    0.18
  -1  17  -3    4.38    0.21
  -1  17  -3    4.01    0.16
   1 -17  -3    4.43    0.19
  -1 -17   3    4.39    0.17
   3  17  -3    2.24    0.15
  -3  17   3    2.30    0.13
  -3 -17  -3    2.18    0.13
   3 -17   3    2.30    0.10
   3  17  -3    2.14    0.10
   3 -17   3    2.02    0.13
  -3  17   3    2.27    0.14
  -3 -17   3    2.40    0.13
  -3  17  -3    2.01    0.11
  -3 -17   3    2.20    0.14
   3  17   3    2.09    0.11
  -3  17  -3    2.27    0.15
   3  17   3    2.44    0.15
   3 -17  -3    2.30    0.12
   3 -17  -3    2.22    0.13
   5  17  -3    1.57    0.08
  -5  17   3    1.66    0.12
  -5  17   3    1.58    0.11
   5  17  -3    1.48    0.13
  -5 -17  -3    1.64    0.12
   5  17  -3    1.76    0.11
  -5 -17  -3    1.47    0.11
   5 -17   3    1.86    0.13
   5 -17   3    1.53    0.08
   5  17   3    1.68    0.13
   5 -17  -3    1.72    0.10
  -5 -17   3    1.65    0.12
   5 -17  -3    1.73    0.12
   5  17   3    1.75    0.09
  -5  17  -3    1.67    0.11
  -5  17  -3    1.56    0.13
   7 -17   3    0.96    0.11
   7 -17   3    1.11    0.06
  -7  17   3    1.03    0.11
   7  17  -3    1.04    0.05
  -7 -17  -3    0.99    0.11
  -7  17   3    0.97    0.10
   7  17  -3    1.12    0.10
  -7 -17  -3    1.24    0.10
   7  17  -3    1.21    0.14
   7  17   3    1.21    0.11
   7 -17  -3    1.08    0.08
   7  17   3    1.07    0.06
  -7  17  -3    0.86    0.11
  -7 -17   3    0.83    0.10
  -7  17  -3    1.06    0.10
   7 -17  -3    1.21    0.12
  -9 -17  -3    0.88    0.10
  -9 -17  -3    0.70    0.10
   9  17  -3    0.78    0.11
  -9  17   3    0.80    0.09
  -9  17   3    0.77    0.10
   9  17  -3    0.59    0.08
   9 -17   3    0.85    0.05
   9 -17   3    0.91    0.11
   9 -17  -3    0.79    0.07
  -9  17  -3    0.83    0.10
  -9  17  -3    0.57    0.09
   9  17   3    0.84    0.12
   9 -17  -3    0.79    0.10
  -9 -17   3    0.64    0.09
 -11 -17  -3    3.24    0.19
 -11  17   3    3.08    0.18
  11 -17   3    2.81    0.17
 -11 -17  -3    3.40    0.17
  11  17  -3    3.11    0.17
 -11  17   3    3.01    0.16
  11  17  -3    2.83    0.18
 -11 -17   3    3.04    0.18
  11 -17  -3    2.77    0.17
  11 -17  -3    2.80    0.13
  11  17   3    3.36    0.19
 -11  17  -3    3.11    0.17
 -11  17  -3    3.19    0.17
 -13  17   3    1.69    0.14
 -13 -17  -3    1.49    0.12
 -13  17   3    1.28    0.11
  13 -17   3    1.15    0.13
  13  17  -3    1.41    0.13
  13  17  -3    1.34    0.15
  13 -17  -3    1.43    0.14
  13 -17  -3    1.43    0.10
  13  17   3    1.48    0.13
 -13  17  -3    1.51    0.12
 -13 -17   3    1.31    0.13
 -13  17  -3    1.38    0.14
  13  17   3    1.17    0.13
 -15 -17  -3    0.20    0.06
  15  17  -3    0.28    0.09
  15  17  -3    0.28    0.08
  15 -17   3    0.39    0.08
 -15  17   3    0.38    0.09
 -15  17   3    0.26    0.07
 -15  17  -3    0.38    0.08
  15 -17  -3    0.26    0.08
 -15  17  -3    0.38    0.07
 -15 -17   3    0.35    0.08
  15 -17  -3    0.28    0.06
  15  17   3    0.49    0.09
  15  17   3    0.53    0.11
  17  17  -3    1.02    0.14
 -17 -17  -3    1.07    0.12
 -17  17   3    1.09    0.14
  17 -17   3    1.16    0.14
  17  17  -3    1.27    0.15
  17 -17  -3    1.18    0.10
  17 -17  -3    1.00    0.13
 -17  17  -3    0.97    0.11
 -17 -17   3    0.94    0.13
  17  17   3    0.90    0.13
  17  17   3    0.96    0.13
 -17  17  -3    0.99    0.12
  19  17  -3    1.61    0.17
 -19  17   3    1.62    0.17
 -19 -17  -3    1.75    0.15
  19 -17   3    1.44    0.16
  19  17  -3    1.32    0.16
 -19  17  -3    1.68    0.13
  19  17   3    2.03    0.18
 -19 -17   3    1.84    0.18
 -19  17  -3    1.63    0.17
  19  17   3    1.44    0.16
  19 -17  -3    1.54    0.17
  21 -17   3    1.84    0.19
  21  17  -3    1.36    0.16
 -21 -17  -3    1.71    0.17
 -21  17   3    1.40    0.16
  21  17  -3    1.70    0.19
 -21 -17   3    1.68    0.17
 -21  17  -3    1.95    0.17
  21  17   3    1.52    0.17
  21 -17  -3    1.79    0.18
  21  17   3    1.62    0.18
 -23 -17  -3    1.02    0.14
  23 -17   3    1.23    0.16
  23  17  -3    1.12    0.15
 -23  17   3    0.91    0.14
  23  17  -3    0.75    0.14
  23  17   3    0.97    0.15
  23  17   3    1.08    0.16
  23 -17  -3    0.98    0.15
 -23  17  -3    1.16    0.16
 -23 -17   3    1.09    0.14
 -25 -17  -3    2.52    0.20
  25  17  -3    2.47    0.22
  25  17  -3    2.52    0.21
 -25  17   3    2.40    0.21
  25 -17   3    2.32    0.23
 -25  17  -3    2.19    0.20
 -25 -17   3    2.73    0.21
  25  17   3    2.28    0.21
  25  17   3    2.13    0.22
  25 -17  -3    1.87    0.20
  27  17  -3    0.28    0.09
 -27 -17  -3    0.08    0.09
  27 -17   3    0.07    0.08
  27  17  -3    0.18    0.10
 -27  17   3    0.49    0.12
 -27  17  -3    0.28    0.10
  27  17   3    0.14    0.10
  27 -17  -3    0.06    0.09
  27  17   3    0.22    0.11
 -27 -17   3    0.19    0.11
  29  17  -3    1.77    0.20
  29  17  -3    1.51    0.20
 -29  17   3    1.74    0.21
  29 -17   3    1.33    0.19
 -29 -17  -3    1.89    0.20
  29  17   3    1.90    0.22
 -29 -17   3    2.09    0.22
  29 -17  -3    1.57    0.20
 -29  17  -3    1.98    0.22
  29  17   3    1.99    0.22
  31 -17   3    0.32    0.12
 -31  17   3    0.18    0.11
  31  17  -3    0.26    0.11
  31  17  -3    0.27    0.12
  31  17   3    0.24    0.11
 -31  17  -3    0.36    0.13
  31 -17  -3    0.20    0.10
 -31 -17   3    0.35    0.13
  31  17   3    0.30    0.12
  33  17  -3    0.43    0.14
 -33  17   3    0.56    0.15
  33 -17   3    0.72    0.15
  33  17   3    0.40    0.15
 -33 -17   3    0.43    0.14
 -33  17  -3    0.34    0.14
  33  17   3    0.43    0.13
  33 -17  -3    0.28    0.12
  35  17  -3   -0.07    0.11
  35 -17   3    0.14    0.10
 -35  17   3    0.30    0.13
 -35 -17   3    0.15    0.13
  35 -17  -3    0.42    0.14
 -35  17  -3    0.04    0.12
[truncated: 3,183,942 more chars]
